# Supplementary material for: Developmental Dynamics of the Gut Virome in Tibetan Pigs at High Altitude: A Metagenomic Perspective across Age Groups
Source: MDPI journal article supplement (doi:10.3390/v16040606), 2024-04-14

**Supplementary Figure S1. Venn diagram of results from three virus sequence identification tools**

IMG, VirFinder, VirSorter2 were used to identified putitive viral contigs.

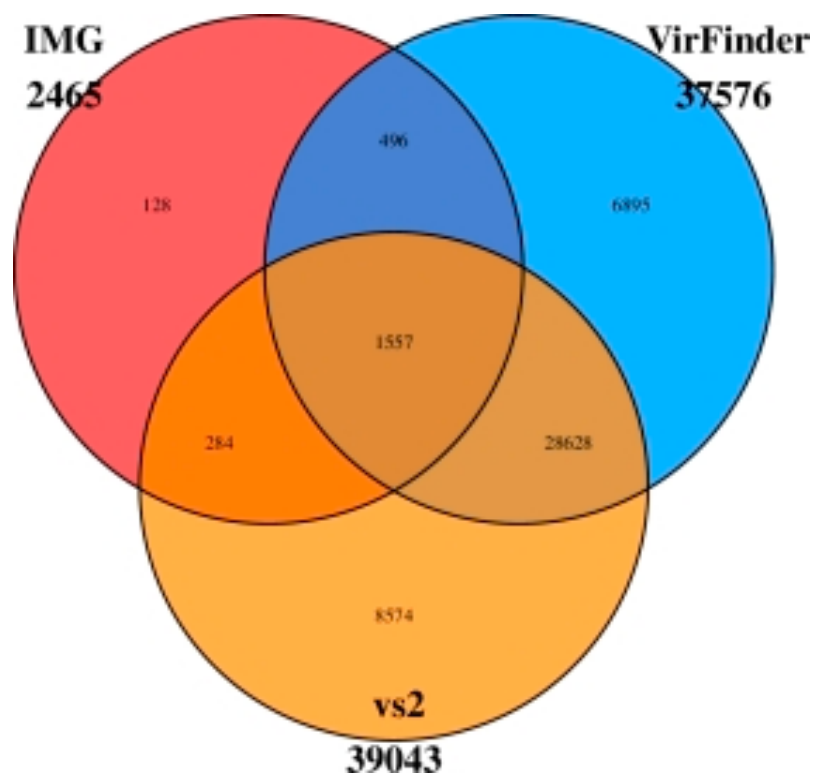

Supplement: s1 [file s1]
