# Supplementary material for: Developmental Dynamics of the Gut Virome in Tibetan Pigs at High Altitude: A Metagenomic Perspective across Age Groups
Source: Viruses. 2024 Apr 14;16(4):606. doi: 10.3390/v16040606 (PMC11054254; doi:10.3390/v16040606)
Supplement: Supplementary file 1 [file viruses-16-00606-s001.zip]

Archive with 6 entries (6 files):
- Supplemental Figure S1.pdf
- Supplemental Table S1.xls
- Supplemental Table S2.xls
- Supplemental Table S3.xlsx
- Supplemental Table S4.xlsx
- Supplemental Table S5.xls
