# Supplementary material for: Developmental Dynamics of the Gut Virome in Tibetan Pigs at High Altitude: A Metagenomic Perspective across Age Groups
Source: Viruses. 2024 Apr 14;16(4):606. doi: 10.3390/v16040606 (PMC11054254; doi:10.3390/v16040606)
Supplement: Supplementary file 1 [file viruses-16-00606-s001.zip › Supplemental Table S1.xls]

## Sheet: Supplemental Table1
Table S1:Removing read sequences from clean reads that are aligned to the host genome.
SampleID	TotalInputReadsPair	host	nohostReadsPair	nohostrate(%)
B1Y	99827	12155	40089779	87.82
B2Y	99827	12155	31596988	87.82
B3Y	99827	12155	36413344	87.82
B4Y	99827	12155	44759805	87.82
B5Y	99827	12155	28659502	87.82
Y1Y	99827	12155	50153082	87.82
Y2Y	99827	12155	46258289	87.82
Y3Y	99827	12155	36256486	87.82
Y4Y	99827	12155	39596223	87.82
Y5Y	99827	12155	49501714	87.82
Z1Y	99827	12155	49557288	87.82
Z2Y	99827	12155	39844693	87.82
Z3Y	99827	12155	53793621	87.82
Z4Y	99827	12155	57462315	87.82
Z5Y	99827	12155	62292760	87.82
