# Supplementary material for: Developmental Dynamics of the Gut Virome in Tibetan Pigs at High Altitude: A Metagenomic Perspective across Age Groups
Source: Viruses. 2024 Apr 14;16(4):606. doi: 10.3390/v16040606 (PMC11054254; doi:10.3390/v16040606)
Supplement: Supplementary file 1 [file viruses-16-00606-s001.zip › Supplemental Table S2.xls]

## Sheet: Sheet1
Table S2. Statistics on splicing results of metagenomic samples
SampleID	Number	Length	N50	N90	Max	Min
B1Y	72232	61484378	1075	377	96907	200
B2Y	58700	53498916	1241	387	97803	200
B3Y	34377	34215158	1545	389	405580	200
B4Y	40437	38716055	1354	388	405583	200
B5Y	33069	33130010	1523	395	405407	200
Y1Y	53971	56361016	1629	405	146132	200
Y2Y	34729	31113018	1201	377	164077	200
Y3Y	32981	30072840	1273	382	63391	200
Y4Y	60989	59194235	1405	397	151474	200
Y5Y	20708	17701545	1136	367	58288	200
Z1Y	14814	16768988	2255	416	150762	200
Z2Y	77128	68623781	1142	385	150539	200
Z3Y	38963	44576065	2113	420	107462	200
Z4Y	65802	75378595	2015	420	385193	200
Z5Y	29327	28417416	1335	392	174034	200
