# Supplementary material for: Developmental Dynamics of the Gut Virome in Tibetan Pigs at High Altitude: A Metagenomic Perspective across Age Groups
Source: Viruses. 2024 Apr 14;16(4):606. doi: 10.3390/v16040606 (PMC11054254; doi:10.3390/v16040606)
Supplement: Supplementary file 1 [file viruses-16-00606-s001.zip › Supplemental Table S3.xlsx]

## Sheet: annotation.table
Table S3 Total annotations of vOTUs fragments.
GeneID	Length	NR_tophit_name	NR_tophit_descrip	NR_top_%-Simil	Swiss_tophit_name	Swissprot_tophit_descrip	Swissprot_top_%-Simil	GOs	COG/KOG	Function	KO/Gene_ID	KEGG_GENE_NAME
B1Y__10007_1	204	_	_	_	_	_	_	_	_	_	_	_
B1Y__10007_2	40	_	_	_	_	_	_	_	_	_	_	_
B1Y__10007_3	92	_	_	_	_	_	_	_	_	_	_	_
B1Y__10007_4	605	major capsid protein	d__Viruses;p__norank;c__norank;o__norank;f__Microviridae;g__norank;s__Alces alces faeces associated microvirus MP10 5560 [ssDNA]	38.5	sp|P11333|CAPSD_SPV4	Capsid protein VP1 OS=Spiroplasma virus 4 OX=10855 GN=ORF1 PE=1 SV=1	35	_	_	_	_	_
B1Y__10007_5	134	DNA pilot protein VP2	d__Viruses;p__norank;c__norank;o__norank;f__Microviridae;g__norank;s__Gokushovirinae Bog5712	85.7	_	_	_	_	_	_	_	_
B1Y__10009_1	226	minor capsid protein	d__Viruses;p__norank;c__norank;o__norank;f__Microviridae;g__norank;s__Lynx canadensis associated microvirus CLP 9413 [ssDNA]	60.6	_	_	_	_	_	_	_	_
B1Y__10009_2	553	major capsid protein	d__Viruses;p__norank;c__norank;o__norank;f__Microviridae;g__norank;s__Lynx canadensis associated microvirus CLP 9413 [ssDNA]	70.5	sp|P19192|CAPSD_BPCHP	Capsid protein VP1 OS=Chlamydia phage 1 OX=2003327 GN=ORF1 PE=1 SV=2	41.2	_	_	_	_	_
B1Y__10009_3	168	_	_	_	_	_	_	_	_	_	_	_
B1Y__10009_4	90	_	_	_	_	_	_	_	_	_	_	_
B1Y__10009_5	38	_	_	_	_	_	_	_	_	_	_	_
B1Y__10009_6	78	_	_	_	_	_	_	_	_	_	_	_
B1Y__10059_1	154	terminase small subunit	d__Viruses;p__norank;c__norank;o__norank;f__norank;g__Phietavirus;s__Phietavirus ETA [dsDNA]	40.4	_	_	_	_	COG3728	L	K07474	xtmA
B1Y__10059_2	461	terminase family protein	d__Viruses;p__norank;c__norank;o__norank;f__Siphoviridae;g__norank;s__Enterococcus phage EFC-1 [dsDNA]	66.8	_	_	_	_	_	_	K06909	xtmB
B1Y__10059_3	95	_	_	_	_	_	_	_	_	_	_	_
B1Y__10059_4	417	portal protein	d__Viruses;p__norank;c__norank;o__norank;f__Siphoviridae;g__norank;s__Streptococcus phage SMP [dsDNA]	53.4	_	_	_	GO:0005575;GO:0019012;GO:0019028;GO:0032991;GO:0044423;GO:0046729;GO:0046798	_	_	_	_
B1Y__10077_1	152	minor capsid protein	d__Viruses;p__norank;c__norank;o__norank;f__Microviridae;g__norank;s__Lynx canadensis associated microvirus CLP 9413 [ssDNA]	45.6	_	_	_	_	_	_	_	_
B1Y__10077_2	90	_	_	_	_	_	_	_	_	_	_	_
B1Y__10077_3	38	_	_	_	_	_	_	_	_	_	_	_
B1Y__10077_4	327	replication initiation protein	d__Viruses;p__norank;c__norank;o__norank;f__Microviridae;g__norank;s__Lynx canadensis associated microvirus CLP 9413 [ssDNA]	48.2	_	_	_	_	_	_	_	_
B1Y__10077_5	58	_	_	_	_	_	_	_	_	_	_	_
B1Y__10077_6	155	_	_	_	_	_	_	_	_	_	_	_
B1Y__10092_1	809	tail protein	d__Viruses;p__norank;c__norank;o__norank;f__Siphoviridae;g__norank;s__Streptococcus phage P9 [dsDNA]	47.8	_	_	_	GO:0005575;GO:0008150;GO:0016032;GO:0018995;GO:0019012;GO:0019058;GO:0019062;GO:0022610;GO:0033643;GO:0033644;GO:0043657;GO:0044215;GO:0044216;GO:0044217;GO:0044218;GO:0044228;GO:0044279;GO:0044403;GO:0044406;GO:0044419;GO:0044423;GO:0044650;GO:0051704;GO:0098015;GO:0098024	COG1511|COG4733|COG4926	S	_	_
B1Y__10092_2	284	hypothetical protein	d__Viruses;p__norank;c__norank;o__norank;f__Siphoviridae;g__norank;s__Streptococcus phage P9 [dsDNA]	42	_	_	_	GO:0005575;GO:0019012;GO:0044423;GO:0098015	_	_	_	_
B1Y__10092_3	910	tape measure protein	d__Viruses;p__norank;c__norank;o__norank;f__Siphoviridae;g__norank;s__Streptococcus phage P9 [dsDNA]	38.8	_	_	_	_	COG1196|COG5412	D	_	_
B1Y__1009_1	25	_	_	_	_	_	_	_	_	_	_	_
B1Y__1009_10	61	_	_	_	_	_	_	_	_	_	_	_
B1Y__1009_11	126	_	_	_	_	_	_	_	_	_	_	_
B1Y__1009_12	88	_	_	_	_	_	_	_	_	_	_	_
B1Y__1009_13	83	_	_	_	_	_	_	_	_	_	_	_
B1Y__1009_14	439	_	_	_	_	_	_	_	_	_	_	_
B1Y__1009_2	271	_	_	_	_	_	_	_	_	_	_	_
B1Y__1009_3	119	_	_	_	_	_	_	_	_	_	_	_
B1Y__1009_4	100	_	_	_	_	_	_	_	_	_	_	_
B1Y__1009_5	245	site-specific DNA-methyltransferase	d__Viruses;p__norank;c__norank;o__norank;f__norank;g__Sextaecvirus;s__Sextaecvirus SEP9 [dsDNA]	29.9	sp|P29538|MTH1_HAEPA	Modification methylase HpaI OS=Haemophilus parainfluenzae OX=729 GN=hpaIM PE=3 SV=1	30	_	COG0863	L	K00571	E2.1.1.72
B1Y__1009_6	197	hypothetical protein	d__Viruses;p__norank;c__norank;o__norank;f__norank;g__Polybotosvirus;s__Polybotosvirus Atuph07 [dsDNA]	37.1	_	_	_	_	_	_	_	_
B1Y__1009_7	31	_	_	_	_	_	_	_	_	_	_	_
B1Y__1009_8	195	_	_	_	_	_	_	_	_	_	_	_
B1Y__1009_9	87	_	_	_	_	_	_	_	_	_	_	_
B1Y__10122_1	524	_	_	_	_	_	_	_	_	_	_	_
B1Y__10122_2	73	_	_	_	_	_	_	_	_	_	_	_
B1Y__10122_3	108	_	_	_	_	_	_	_	_	_	_	_
B1Y__10122_4	398	_	_	_	_	_	_	_	_	_	_	_
B1Y__10122_5	125	_	_	_	_	_	_	_	_	_	_	_
B1Y__10140_1	941	tape measure protein	d__Viruses;p__norank;c__norank;o__norank;f__norank;g__Scapunavirus;s__Scapunavirus scap1 [dsDNA]	36.1	_	_	_	_	COG5412	S	_	_
B1Y__10140_2	274	lysin	d__Viruses;p__norank;c__norank;o__norank;f__Herelleviridae;g__Hopescreekvirus;s__Hopescreekvirus LfeInf [dsDNA]	71.1	_	_	_	_	_	_	_	_
B1Y__10162_1	1267	transglycosylase CwlP	d__Viruses;p__norank;c__norank;o__norank;f__norank;g__Spbetavirus;s__Spbetavirus SPbeta [dsDNA]	29.7	sp|O31976|YOMI_BACSU	SPbeta prophage-derived uncharacterized transglycosylase YomI OS=Bacillus subtilis (strain 168) OX=224308 GN=yomI PE=3 SV=2	29.7	_	COG0739|COG0741|COG1196	M	_	_
B1Y__10162_2	684	putative minor structural protein	d__Viruses;p__norank;c__norank;o__norank;f__Herelleviridae;g__Jeonjuvirus;s__Jeonjuvirus BSP38 [dsDNA]	24.5	_	_	_	GO:0003674;GO:0005488;GO:0005515;GO:0005575;GO:0008150;GO:0016032;GO:0019012;GO:0019058;GO:0019062;GO:0022610;GO:0042802;GO:0044403;GO:0044406;GO:0044419;GO:0044423;GO:0044650;GO:0051704;GO:0098015;GO:0098024	_	_	_	_
B1Y__10162_3	516	tape measure protein	d__Viruses;p__norank;c__norank;o__norank;f__norank;g__Fromanvirus;s__Mycobacterium phage Pioneer [dsDNA]	39.2	_	_	_	_	_	_	_	_
B1Y__10175_1	85	_	_	_	_	_	_	_	_	_	_	_
B1Y__10175_2	46	_	_	_	_	_	_	_	_	_	_	_
B1Y__10175_3	122	_	_	_	_	_	_	_	_	_	_	_
B1Y__10175_4	138	_	_	_	_	_	_	_	_	_	_	_
B1Y__10175_5	195	_	_	_	_	_	_	_	_	_	_	_
B1Y__10175_6	297	_	_	_	_	_	_	_	_	_	_	_
B1Y__10175_7	164	_	_	_	_	_	_	_	_	_	_	_
B1Y__10175_8	264	_	_	_	_	_	_	_	_	_	_	_
B1Y__10183_1	560	major capsid protein	d__Viruses;p__norank;c__norank;o__norank;f__Microviridae;g__norank;s__Alces alces faeces associated microvirus MP18 4940 [ssDNA]	43.1	_	_	_	_	_	_	_	_
B1Y__10183_2	160	_	_	_	_	_	_	_	_	_	_	_
B1Y__10183_3	88	_	_	_	_	_	_	_	_	_	_	_
B1Y__10183_4	323	replication initiator protein	d__Viruses;p__norank;c__norank;o__norank;f__Microviridae;g__norank;s__Chimpanzee faeces associated microphage 2 [ssDNA]	37	_	_	_	_	_	_	_	_
B1Y__10183_5	233	_	_	_	_	_	_	_	_	_	_	_
B1Y__10183_6	115	_	_	_	_	_	_	_	_	_	_	_
B1Y__10183_7	83	_	_	_	_	_	_	_	_	_	_	_
B1Y__10183_8	107	major CP	d__Viruses;p__norank;c__norank;o__norank;f__Microviridae;g__norank;s__Chimpanzee faeces associated microphage 2 [ssDNA]	63.4	_	_	_	_	_	_	_	_
B1Y__10188_1	309	major capsid protein	d__Viruses;p__norank;c__norank;o__norank;f__norank;g__Sherbrookevirus;s__Sherbrookevirus CDHM11 [dsDNA]	23.3	_	_	_	_	COG4653	S	_	_
B1Y__10188_10	120	gp18	d__Viruses;p__norank;c__norank;o__norank;f__Siphoviridae;g__norank;s__Brochothrix phage BL3 [dsDNA]	54.7	_	_	_	_	_	_	_	_
B1Y__10188_11	166	tail protein	d__Viruses;p__norank;c__norank;o__norank;f__Siphoviridae;g__norank;s__Lactococcus phage PLgT-1 [dsDNA]	35.4	_	_	_	GO:0008150;GO:0044403;GO:0044409;GO:0044411;GO:0044419;GO:0051701;GO:0051704;GO:0051828;GO:0051830;GO:0085027	COG0845	M	_	_
B1Y__10188_2	66	_	_	_	_	_	_	_	_	_	_	_
B1Y__10188_3	119	_	_	_	_	_	_	_	_	_	_	_
B1Y__10188_4	156	hypothetical protein	d__Viruses;p__norank;c__norank;o__norank;f__Siphoviridae;g__norank;s__Paenibacillus phage PG1 [dsDNA]	39.9	_	_	_	_	_	_	_	_
B1Y__10188_5	133	_	_	_	_	_	_	_	_	_	_	_
B1Y__10188_6	138	hypothetical protein	d__Viruses;p__norank;c__norank;o__norank;f__Siphoviridae;g__norank;s__Paenibacillus phage PG1 [dsDNA]	59.8	_	_	_	_	_	_	_	_
B1Y__10188_7	116	_	_	_	_	_	_	_	_	_	_	_
B1Y__10188_8	103	_	_	_	_	_	_	_	_	_	_	_
B1Y__10188_9	991	_	_	_	_	_	_	_	_	_	_	_
B1Y__10202_1	147	major capsid protein	d__Viruses;p__norank;c__norank;o__norank;f__Microviridae;g__norank;s__Alces alces faeces associated microvirus MP10 5560 [ssDNA]	52.6	sp|Q9G059|CAPSD_BPPHM	Capsid protein VP1 OS=Bdellovibrio phage phiMH2K OX=145579 GN=ORF1 PE=3 SV=1	44.1	_	_	_	_	_
B1Y__10202_2	157	_	_	_	_	_	_	_	_	_	_	_
B1Y__10202_3	84	_	_	_	_	_	_	_	_	_	_	_
B1Y__10202_4	59	_	_	_	_	_	_	_	_	_	_	_
B1Y__10202_5	40	_	_	_	_	_	_	_	_	_	_	_
B1Y__10202_6	328	replication initiator protein	d__Viruses;p__norank;c__norank;o__norank;f__Microviridae;g__norank;s__Chimpanzee faeces associated microphage 2 [ssDNA]	38.3	_	_	_	_	_	_	_	_
B1Y__10211_1	94	_	_	_	_	_	_	_	_	_	_	_
B1Y__10211_2	94	gp7	d__Viruses;p__norank;c__norank;o__norank;f__norank;g__Slepowronvirus;s__Listeria phage B025 [dsDNA]	43	_	_	_	_	_	_	_	_
B1Y__10211_3	54	gp6	d__Viruses;p__norank;c__norank;o__norank;f__norank;g__Slepowronvirus;s__Listeria phage B025 [dsDNA]	50	_	_	_	_	_	_	_	_
B1Y__10211_4	385	major capsid protein	d__Viruses;p__norank;c__norank;o__norank;f__Siphoviridae;g__norank;s__Bacillus phage vB	55.5	_	_	_	_	COG4653	S	_	_
B1Y__10211_5	268	putative ClpP protease	d__Viruses;p__norank;c__norank;o__norank;f__Siphoviridae;g__norank;s__Lactobacillus phage JCL1032 [dsDNA]	36.6	_	_	_	_	_	_	K01358	clpP, CLPP
B1Y__1022_1	28	_	_	_	_	_	_	_	_	_	_	_
B1Y__1022_10	71	_	_	_	_	_	_	_	_	_	_	_
B1Y__1022_2	109	_	_	_	_	_	_	_	_	_	_	_
B1Y__1022_3	69	_	_	_	_	_	_	_	_	_	_	_
B1Y__1022_4	87	_	_	_	_	_	_	_	_	_	_	_
B1Y__1022_5	70	_	_	_	_	_	_	_	_	_	_	_
B1Y__1022_6	140	_	_	_	_	_	_	_	_	_	_	_
B1Y__1022_7	83	_	_	_	_	_	_	_	_	_	_	_
B1Y__1022_8	67	_	_	_	_	_	_	_	_	_	_	_
B1Y__1022_9	96	hypothetical protein	d__Viruses;p__norank;c__norank;o__norank;f__norank;g__Camtrevirus;s__Camtrevirus BtCS33 [dsDNA]	34.1	_	_	_	_	_	_	_	_
B1Y__10249_1	48	_	_	_	_	_	_	_	_	_	_	_
B1Y__10249_2	176	_	_	_	_	_	_	_	_	_	_	_
B1Y__10249_3	114	_	_	_	_	_	_	_	_	_	_	_
B1Y__10249_4	130	_	_	_	_	_	_	_	_	_	_	_
B1Y__10249_5	314	_	_	_	_	_	_	_	_	_	_	_
B1Y__10249_6	64	_	_	_	_	_	_	_	_	_	_	_
B1Y__10278_1	64	_	_	_	_	_	_	_	_	_	_	_
B1Y__10278_10	92	_	_	_	_	_	_	_	_	_	_	_
B1Y__10278_2	56	_	_	_	_	_	_	_	_	_	_	_
B1Y__10278_3	87	_	_	_	_	_	_	_	_	_	_	_
B1Y__10278_4	290	_	_	_	_	_	_	_	_	_	_	_
B1Y__10278_5	124	_	_	_	_	_	_	_	_	_	_	_
B1Y__10278_6	594	_	_	_	_	_	_	_	_	_	_	_
B1Y__10278_7	134	_	_	_	_	_	_	_	_	_	_	_
B1Y__10278_8	56	_	_	_	_	_	_	_	_	_	_	_
B1Y__10278_9	212	_	_	_	_	_	_	_	_	_	_	_
B1Y__10279_1	59	_	_	_	_	_	_	_	_	_	_	_
B1Y__10279_2	251	rep	d__Viruses;p__norank;c__norank;o__norank;f__Genomoviridae;g__Gemykibivirus;s__Gemykibivirus monas1 [ssDNA]	98	_	_	_	GO:0008150;GO:0016032;GO:0019058;GO:0019079;GO:0039682;GO:0039684;GO:0039687;GO:0039693;GO:0044403;GO:0044419;GO:0051701;GO:0051704	_	_	_	_
B1Y__10279_3	120	rep	d__Viruses;p__norank;c__norank;o__norank;f__Genomoviridae;g__Gemykibivirus;s__Gemykibivirus monas1 [ssDNA]	88.2	sp|P31618|REP_TYDVA	Replication-associated protein OS=Tobacco yellow dwarf virus (strain Australia) OX=31599 GN=C1/C2 PE=3 SV=2	42.5	_	_	_	_	_
B1Y__10279_4	337	capsid	d__Viruses;p__norank;c__norank;o__norank;f__Genomoviridae;g__Gemykibivirus;s__Gemykibivirus monas1 [ssDNA]	99.2	_	_	_	_	_	_	_	_
B1Y__10312_1	115	minor capsid protein	d__Viruses;p__norank;c__norank;o__norank;f__Microviridae;g__norank;s__Lynx canadensis associated microvirus CLP 9413 [ssDNA]	67.6	_	_	_	_	_	_	_	_
B1Y__10312_2	349	replication initiation protein	d__Viruses;p__norank;c__norank;o__norank;f__Microviridae;g__norank;s__Lynx canadensis associated microvirus CLP 9413 [ssDNA]	51.5	sp|P11334|REP_SPV4	Replication-associated protein ORF2 OS=Spiroplasma virus 4 OX=10855 GN=ORF2 PE=3 SV=1	29.4	_	_	_	_	_
B1Y__10312_3	82	nonstructural protein	d__Viruses;p__norank;c__norank;o__norank;f__Microviridae;g__norank;s__Alces alces faeces associated microvirus MP18 4940 [ssDNA]	47.4	_	_	_	_	_	_	_	_
B1Y__10312_4	83	minor capsid protein	d__Viruses;p__norank;c__norank;o__norank;f__Microviridae;g__norank;s__Lynx canadensis associated microvirus CLP 9413 [ssDNA]	61	_	_	_	_	_	_	_	_
B1Y__10316_1	119	hypothetical protein	d__Viruses;p__norank;c__norank;o__norank;f__norank;g__norank;s__crAssphage cr1	84.9	_	_	_	_	_	_	_	_
B1Y__10316_2	153	hypothetical protein	d__Viruses;p__norank;c__norank;o__norank;f__norank;g__norank;s__crAssphage cr109	59.1	_	_	_	_	_	_	_	_
B1Y__10316_3	337	outer capsid protein/viral fiber	d__Viruses;p__norank;c__norank;o__norank;f__norank;g__norank;s__crAssphage cr4	53.5	_	_	_	_	_	_	_	_
B1Y__10316_4	39	_	_	_	_	_	_	_	_	_	_	_
B1Y__1033_1	179	hypothetical protein	d__Viruses;p__norank;c__norank;o__norank;f__norank;g__Fremauxvirus;s__Fremauxvirus fv1706 [dsDNA]	34.3	_	_	_	_	_	_	_	_
B1Y__1033_2	129	hypothetical protein	d__Viruses;p__norank;c__norank;o__norank;f__norank;g__Mudcatvirus;s__Mudcatvirus circum [dsDNA]	35.5	_	_	_	_	_	_	_	_
B1Y__1033_3	477	tapemeasure protein	d__Viruses;p__norank;c__norank;o__norank;f__norank;g__Galaxyvirus;s__Galaxyvirus galaxy [dsDNA]	30.8	_	_	_	_	COG1196|COG3941|COG5283	D	_	_
B1Y__10393_1	437	_	_	_	_	_	_	_	_	_	_	_
B1Y__10393_2	325	_	_	_	_	_	_	_	_	_	_	_
B1Y__103_1	213	glucosaminidase domain-containing protein	d__Viruses;p__norank;c__norank;o__norank;f__Siphoviridae;g__norank;s__Streptococcus phage SMP [dsDNA]	41.5	sp|O03979|ALYS_BPDP1	Lysin OS=Pneumococcus phage Dp-1 OX=59241 GN=PAL PE=1 SV=1	50	_	COG0791|COG3023	M	_	_
B1Y__103_2	773	_	_	_	_	_	_	_	_	_	_	_
B1Y__10408_1	148	_	_	_	_	_	_	_	_	_	_	_
B1Y__10408_2	575	_	_	_	_	_	_	_	_	_	_	_
B1Y__10408_3	201	_	_	_	_	_	_	_	_	_	_	_
B1Y__10445_1	169	major CP	d__Viruses;p__norank;c__norank;o__norank;f__Microviridae;g__norank;s__Chimpanzee faeces associated microphage 2 [ssDNA]	75.7	_	_	_	_	_	_	_	_
B1Y__10445_2	275	_	_	_	_	_	_	_	_	_	_	_
B1Y__10445_3	43	_	_	_	_	_	_	_	_	_	_	_
B1Y__10445_4	309	_	_	_	_	_	_	_	_	_	_	_
B1Y__10456_1	64	_	_	_	_	_	_	_	_	_	_	_
B1Y__10456_2	53	_	_	_	_	_	_	_	_	_	_	_
B1Y__10456_3	267	_	_	_	_	_	_	_	_	_	_	_
B1Y__10456_4	54	_	_	_	_	_	_	_	_	_	_	_
B1Y__10456_5	34	_	_	_	_	_	_	_	_	_	_	_
B1Y__10476_1	524	putative terminase large subunit	d__Viruses;p__norank;c__norank;o__norank;f__norank;g__Becedseptimavirus;s__Becedseptimavirus BCD7 [dsDNA]	53.8	_	_	_	_	_	_	_	_
B1Y__10476_10	91	_	_	_	_	_	_	_	_	_	_	_
B1Y__10476_11	256	hypothetical protein	d__Viruses;p__norank;c__norank;o__norank;f__Siphoviridae;g__norank;s__Clostridium phage phiCD211 [dsDNA]	34.3	_	_	_	_	_	_	_	_
B1Y__10476_12	549	vitamin B12-dependent ribonucleotide reductase	d__Viruses;p__norank;c__norank;o__norank;f__norank;g__norank;s__crAssphage cr126	28.6	sp|Q9HI70|NDRZ_THEAC	Vitamin B12-dependent ribonucleoside-diphosphate reductase OS=Thermoplasma acidophilum (strain ATCC 25905 / DSM 1728 / JCM 9062 / NBRC 15155 / AMRC-C165) OX=273075 GN=Ta1475 PE=1 SV=2	34.2	_	_	_	_	_
B1Y__10476_2	220	_	_	_	_	_	_	_	_	_	_	_
B1Y__10476_3	170	_	_	_	_	_	_	_	_	_	_	_
B1Y__10476_4	98	_	_	_	_	_	_	_	_	_	_	_
B1Y__10476_5	80	_	_	_	_	_	_	_	_	_	_	_
B1Y__10476_6	399	putative ATP-dependent DNA ligase	d__Viruses;p__norank;c__norank;o__norank;f__norank;g__Becedseptimavirus;s__Becedseptimavirus BCD7 [dsDNA]	30.2	sp|Q8PTK1|DNLI2_METMA	DNA ligase 2 OS=Methanosarcina mazei (strain ATCC BAA-159 / DSM 3647 / Goe1 / Go1 / JCM 11833 / OCM 88) OX=192952 GN=lig2 PE=3 SV=1	24.7	GO:0003674;GO:0003824;GO:0003909;GO:0003910;GO:0005575;GO:0005622;GO:0005623;GO:0005737;GO:0006139;GO:0006259;GO:0006260;GO:0006261;GO:0006266;GO:0006271;GO:0006273;GO:0006281;GO:0006725;GO:0006807;GO:0006950;GO:0006974;GO:0008150;GO:0008152;GO:0009058;GO:0009059;GO:0009987;GO:0016070;GO:0016874;GO:0016886;GO:0022616;GO:0033554;GO:0034641;GO:0034645;GO:0043170;GO:0044237;GO:0044238;GO:0044249;GO:…	COG1793	L	_	_
B1Y__10476_7	178	_	_	_	_	_	_	_	_	_	_	_
B1Y__10476_8	49	_	_	_	_	_	_	_	_	_	_	_
B1Y__10476_9	188	deoxyuridine 5-triphosphate nucleotidohydrolase	d__Viruses;p__norank;c__norank;o__norank;f__norank;g__Denvervirus;s__Denvervirus dv9183 [dsDNA]	35.4	sp|Q9CJ30|DUT_LACLA	Deoxyuridine 5'-triphosphate nucleotidohydrolase OS=Lactococcus lactis subsp. lactis (strain IL1403) OX=272623 GN=dut PE=3 SV=1	35.3	GO:0000287;GO:0003674;GO:0003824;GO:0004170;GO:0005488;GO:0006139;GO:0006220;GO:0006221;GO:0006226;GO:0006244;GO:0006725;GO:0006753;GO:0006793;GO:0006796;GO:0006807;GO:0008150;GO:0008152;GO:0009056;GO:0009058;GO:0009117;GO:0009123;GO:0009124;GO:0009129;GO:0009130;GO:0009141;GO:0009143;GO:0009147;GO:0009149;GO:0009157;GO:0009162;GO:0009165;GO:0009166;GO:0009176;GO:0009177;GO:0009200;GO:0009204;GO:…	COG0756	F	K01520	dut, DUT
B1Y__10477_1	59	_	_	_	_	_	_	_	_	_	_	_
B1Y__10477_2	193	DEAD/DEAH box helicase family protein	d__Viruses;p__norank;c__norank;o__norank;f__norank;g__Oengusvirus;s__Oengusvirus oengus [dsDNA]	65.6	_	_	_	_	_	_	_	_
B1Y__10477_3	199	DEAD/DEAH box helicase family protein	d__Viruses;p__norank;c__norank;o__norank;f__norank;g__Oengusvirus;s__Oengusvirus oengus [dsDNA]	61.3	_	_	_	_	_	_	_	_
B1Y__10477_4	107	hypothetical protein	d__Viruses;p__norank;c__norank;o__norank;f__norank;g__Oengusvirus;s__Oengusvirus oengus [dsDNA]	51.9	_	_	_	_	_	_	_	_
B1Y__10477_5	173	Cas4 family exonuclease	d__Viruses;p__norank;c__norank;o__norank;f__norank;g__Tanisvirus;s__Tanisvirus tanis [dsDNA]	62.8	_	_	_	_	_	_	_	_
B1Y__10490_1	349	replication initiator protein	d__Viruses;p__norank;c__norank;o__norank;f__Microviridae;g__norank;s__Chimpanzee faeces associated microphage 2 [ssDNA]	46	_	_	_	_	_	_	_	_
B1Y__10490_2	52	_	_	_	_	_	_	_	_	_	_	_
B1Y__10490_3	38	_	_	_	_	_	_	_	_	_	_	_
B1Y__10490_4	68	_	_	_	_	_	_	_	_	_	_	_
B1Y__10490_5	45	_	_	_	_	_	_	_	_	_	_	_
B1Y__10490_6	82	nonstructural protein	d__Viruses;p__norank;c__norank;o__norank;f__Microviridae;g__norank;s__Lynx canadensis associated microvirus CLP 9413 [ssDNA]	46.1	_	_	_	_	_	_	_	_
B1Y__10490_7	181	minor capsid protein	d__Viruses;p__norank;c__norank;o__norank;f__Microviridae;g__norank;s__Lynx canadensis associated microvirus CLP 9413 [ssDNA]	48.4	_	_	_	_	_	_	_	_
B1Y__10490_8	28	_	_	_	_	_	_	_	_	_	_	_
B1Y__10492_1	108	putative RNA-polymerase subunit	d__Viruses;p__norank;c__norank;o__norank;f__norank;g__norank;s__crAssphage cr128	69.2	_	_	_	_	_	_	_	_
B1Y__10492_2	1065	putative RNA-polymerase subunit	d__Viruses;p__norank;c__norank;o__norank;f__norank;g__norank;s__crAssphage cr85	67.4	_	_	_	_	_	_	_	_
B1Y__10495_1	156	_	_	_	_	_	_	_	_	_	_	_
B1Y__10495_2	87	_	_	_	_	_	_	_	_	_	_	_
B1Y__10495_3	283	_	_	_	_	_	_	_	_	_	_	_
B1Y__10495_4	70	_	_	_	_	_	_	_	_	_	_	_
B1Y__10528_1	220	_	_	_	_	_	_	_	_	_	_	_
B1Y__10528_2	535	capsid protein	d__Viruses;p__norank;c__norank;o__norank;f__Microviridae;g__Enterogokushovirus;s__Enterogokushovirus EC6098 [ssDNA]	56.3	sp|Q9G059|CAPSD_BPPHM	Capsid protein VP1 OS=Bdellovibrio phage phiMH2K OX=145579 GN=ORF1 PE=3 SV=1	48.6	_	_	_	_	_
B1Y__10533_1	35	_	_	_	_	_	_	_	_	_	_	_
B1Y__10533_2	297	HD domain-containing protein	d__Viruses;p__norank;c__norank;o__norank;f__norank;g__Eponavirus;s__Eponavirus epona [dsDNA]	33.5	_	_	_	_	COG3481	S	_	_
B1Y__10533_3	93	_	_	_	_	_	_	_	_	_	_	_
B1Y__10533_4	137	_	_	_	_	_	_	_	_	_	_	_
B1Y__10533_5	55	_	_	_	_	_	_	_	_	_	_	_
B1Y__10538_1	100	hypothetical protein	d__Viruses;p__norank;c__norank;o__norank;f__Siphoviridae;g__norank;s__Psychrobacter phage Psymv2 [dsDNA]	81.7	_	_	_	_	_	_	_	_
B1Y__10538_2	158	_	_	_	_	_	_	_	_	_	_	_
B1Y__10538_3	139	_	_	_	_	_	_	_	_	_	_	_
B1Y__10538_4	82	_	_	_	_	_	_	_	_	_	_	_
B1Y__10538_5	364	phage tail tape measure	d__Viruses;p__norank;c__norank;o__norank;f__Siphoviridae;g__norank;s__Psychrobacter phage Psymv2 [dsDNA]	33.5	_	_	_	GO:0005575;GO:0018995;GO:0019012;GO:0030430;GO:0033643;GO:0033646;GO:0043656;GO:0043657;GO:0044215;GO:0044216;GO:0044217	COG5283	S	_	_
B1Y__10592_1	611	DNA polymerase III alpha	d__Viruses;p__norank;c__norank;o__norank;f__norank;g__Finchvirus;s__Finchvirus finch [dsDNA]	27.8	sp|O84549|DPO3A_CHLTR	DNA polymerase III subunit alpha OS=Chlamydia trachomatis (strain D/UW-3/Cx) OX=272561 GN=dnaE PE=3 SV=1	29.5	_	_	_	_	_
B1Y__10592_2	196	predicted alternative thymidylate synthase	d__Viruses;p__norank;c__norank;o__norank;f__Siphoviridae;g__norank;s__Clostridium phage phiCP34O [dsDNA]	38	sp|Q5V325|THYX_HALMA	Flavin-dependent thymidylate synthase OS=Haloarcula marismortui (strain ATCC 43049 / DSM 3752 / JCM 8966 / VKM B-1809) OX=272569 GN=thyX PE=3 SV=1	32.1	_	_	_	K03465	thyX, thy1
B1Y__10592_3	70	_	_	_	_	_	_	_	_	_	_	_
B1Y__10592_4	117	_	_	_	_	_	_	_	_	_	_	_
B1Y__10617_1	234	_	_	_	_	_	_	_	_	_	_	_
B1Y__10617_2	291	hypothetical protein	d__Viruses;p__norank;c__norank;o__norank;f__Phycodnaviridae;g__Prasinovirus;s__Ostreococcus lucimarinus virus 1 [dsDNA]	47.1	sp|P43871|MTH3_HAEIN	Modification methylase HindIII OS=Haemophilus influenzae (strain ATCC 51907 / DSM 11121 / KW20 / Rd) OX=71421 GN=hindIIIM PE=1 SV=1	29.7	_	COG0863	L	K00571	E2.1.1.72
B1Y__10617_3	198	putative Seg-like homing endonuclease	d__Viruses;p__norank;c__norank;o__norank;f__Straboviridae;g__Lazarusvirus;s__Lazarusvirus kimel [dsDNA]	43.7	sp|P13325|SEGB_BPT4	Putative endonuclease segB OS=Enterobacteria phage T4 OX=10665 GN=segB PE=4 SV=4	46	_	_	_	_	_
B1Y__10622_1	24	_	_	_	_	_	_	_	_	_	_	_
B1Y__10622_2	35	_	_	_	_	_	_	_	_	_	_	_
B1Y__10622_3	267	replication initiator protein	d__Viruses;p__norank;c__norank;o__norank;f__Microviridae;g__norank;s__Chimpanzee faeces associated microphage 2 [ssDNA]	33.5	_	_	_	_	_	_	_	_
B1Y__10622_4	246	_	_	_	_	_	_	_	_	_	_	_
B1Y__10622_5	40	_	_	_	_	_	_	_	_	_	_	_
B1Y__10622_6	87	_	_	_	_	_	_	_	_	_	_	_
B1Y__10622_7	236	major capsid protein	d__Viruses;p__norank;c__norank;o__norank;f__Microviridae;g__norank;s__Alces alces faeces associated microvirus MP18 4940 [ssDNA]	44	_	_	_	_	_	_	_	_
B1Y__10625_1	323	_	_	_	_	_	_	_	_	_	_	_
B1Y__10625_2	290	_	_	_	_	_	_	_	_	_	_	_
B1Y__10625_3	197	_	_	_	_	_	_	_	_	_	_	_
B1Y__10625_4	94	_	_	_	_	_	_	_	_	_	_	_
B1Y__10625_5	171	_	_	_	_	_	_	_	_	_	_	_
B1Y__1062_1	166	DNA encapsidation protein	d__Viruses;p__norank;c__norank;o__norank;f__Salasmaviridae;g__Beecentumtrevirus;s__Beecentumtrevirus Nf [dsDNA]	47.3	sp|Q37897|PKG16_BPB03	DNA packaging protein OS=Bacillus phage B103 OX=10778 GN=16 PE=3 SV=1	47.8	GO:0003674;GO:0003676;GO:0003723;GO:0003824;GO:0005488;GO:0008150;GO:0016032;GO:0016462;GO:0016787;GO:0016817;GO:0016818;GO:0016887;GO:0017111;GO:0019058;GO:0019068;GO:0019072;GO:0019073;GO:0044403;GO:0044419;GO:0051704;GO:0097159;GO:1901363	_	_	_	_
B1Y__1062_2	40	_	_	_	_	_	_	_	_	_	_	_
B1Y__1062_3	560	DNA polymerase	d__Viruses;p__norank;c__norank;o__norank;f__Salasmaviridae;g__Beecentumtrevirus;s__Beecentumtrevirus Goe1 [dsDNA]	47.7	sp|P19894|DPOL_BPM2	DNA polymerase OS=Bacillus phage M2 OX=331976 GN=G PE=3 SV=1	47.5	GO:0003674;GO:0003824;GO:0003887;GO:0006139;GO:0006259;GO:0006725;GO:0006807;GO:0008150;GO:0008152;GO:0009058;GO:0009059;GO:0009987;GO:0016032;GO:0016740;GO:0016772;GO:0016779;GO:0018130;GO:0019058;GO:0019079;GO:0019438;GO:0034061;GO:0034641;GO:0034645;GO:0034654;GO:0039687;GO:0039693;GO:0043170;GO:0044237;GO:0044238;GO:0044249;GO:0044260;GO:0044271;GO:0044403;GO:0044419;GO:0046483;GO:0051704;GO:…	_	_	K21237	gp2
B1Y__1062_4	228	_	_	_	_	_	_	_	_	_	_	_
B1Y__10630_1	376	major capsid protein	d__Viruses;p__norank;c__norank;o__norank;f__Microviridae;g__norank;s__Lynx canadensis associated microvirus CLP 9413 [ssDNA]	57.4	sp|P19192|CAPSD_BPCHP	Capsid protein VP1 OS=Chlamydia phage 1 OX=2003327 GN=ORF1 PE=1 SV=2	38.1	_	_	_	_	_
B1Y__10630_2	159	minor capsid protein	d__Viruses;p__norank;c__norank;o__norank;f__Microviridae;g__norank;s__Lynx canadensis associated microvirus CLP 9413 [ssDNA]	35.8	_	_	_	_	_	_	_	_
B1Y__10630_3	83	_	_	_	_	_	_	_	_	_	_	_
B1Y__10630_4	38	_	_	_	_	_	_	_	_	_	_	_
B1Y__10630_5	378	replication initiation protein	d__Viruses;p__norank;c__norank;o__norank;f__Microviridae;g__norank;s__Alces alces faeces associated microvirus MP18 4940 [ssDNA]	40.7	_	_	_	_	_	_	_	_
B1Y__10630_6	303	minor capsid protein	d__Viruses;p__norank;c__norank;o__norank;f__Microviridae;g__norank;s__Lynx canadensis associated microvirus CLP 9413 [ssDNA]	31	sp|Q9G055|H_BPPHM	Minor spike protein H OS=Bdellovibrio phage phiMH2K OX=145579 GN=ORF2 PE=3 SV=1	63.4	_	_	_	_	_
B1Y__10630_7	371	major CP	d__Viruses;p__norank;c__norank;o__norank;f__Microviridae;g__norank;s__Chimpanzee faeces associated microphage 2 [ssDNA]	58.3	sp|P19192|CAPSD_BPCHP	Capsid protein VP1 OS=Chlamydia phage 1 OX=2003327 GN=ORF1 PE=1 SV=2	39.6	_	_	_	_	_
B1Y__10662_1	235	_	_	_	_	_	_	_	_	_	_	_
B1Y__10662_2	176	_	_	_	_	_	_	_	_	_	_	_
B1Y__10662_3	802	_	_	_	_	_	_	_	_	_	_	_
B1Y__10686_1	218	transglycosylase	d__Viruses;p__norank;c__norank;o__norank;f__norank;g__Borockvirus;s__Borockvirus brock [dsDNA]	68.1	_	_	_	GO:0003674;GO:0005488;GO:0008150;GO:0010035;GO:0010038;GO:0030955;GO:0031420;GO:0035864;GO:0042221;GO:0043167;GO:0043169;GO:0046872;GO:0050896	COG1652	M	_	_
B1Y__10686_2	353	_	_	_	sp|P57795|ISCS_METTE	Cysteine desulfurase IscS OS=Methanosarcina thermophila OX=2210 GN=iscS PE=3 SV=1	33	_	_	_	K04487	iscS, NFS1
B1Y__10686_3	295	hypothetical protein	d__Viruses;p__norank;c__norank;o__norank;f__norank;g__Myxoctovirus;s__Myxoctovirus Mx8 [dsDNA]	42	_	_	_	_	_	_	_	_
B1Y__10686_4	182	_	_	_	_	_	_	_	_	_	_	_
B1Y__10686_5	23	_	_	_	_	_	_	_	_	_	_	_
B1Y__10697_1	184	hypothetical protein	d__Viruses;p__norank;c__norank;o__norank;f__norank;g__Rimavirus;s__Rimavirus drgrey [dsDNA]	50.3	_	_	_	_	_	_	_	_
B1Y__10697_2	134	hypothetical protein	d__Viruses;p__norank;c__norank;o__norank;f__norank;g__Oengusvirus;s__Oengusvirus oengus [dsDNA]	51.6	_	_	_	_	_	_	_	_
B1Y__10697_3	228	major tail protein	d__Viruses;p__norank;c__norank;o__norank;f__norank;g__Rimavirus;s__Rimavirus rima [dsDNA]	63.3	_	_	_	_	_	_	_	_
B1Y__10697_4	102	hypothetical protein	d__Viruses;p__norank;c__norank;o__norank;f__norank;g__Secretariatvirus;s__Secretariatvirus secretariat [dsDNA]	53.9	_	_	_	_	_	_	_	_
B1Y__10697_5	108	hypothetical protein	d__Viruses;p__norank;c__norank;o__norank;f__norank;g__Gordonvirus;s__Gordonvirus captnmurica [dsDNA]	57.9	_	_	_	_	_	_	_	_
B1Y__10697_6	580	major capsid protein	d__Viruses;p__norank;c__norank;o__norank;f__norank;g__Oengusvirus;s__Oengusvirus oengus [dsDNA]	49.1	_	_	_	_	_	_	K06904	K06904
B1Y__10697_7	417	portal protein	d__Viruses;p__norank;c__norank;o__norank;f__norank;g__Kenoshavirus;s__Kenoshavirus crocheter [dsDNA]	61.6	_	_	_	_	_	_	_	_
B1Y__10697_8	170	_	_	_	_	_	_	_	_	_	_	_
B1Y__10697_9	56	terminase large subunit	d__Viruses;p__norank;c__norank;o__norank;f__norank;g__Scapunavirus;s__Scapunavirus scap1 [dsDNA]	81.8	_	_	_	_	_	_	_	_
B1Y__1071_1	706	_	_	_	_	_	_	_	_	_	_	_
B1Y__1071_2	172	putative TerL large-subunit terminase	d__Viruses;p__norank;c__norank;o__norank;f__norank;g__Popoffvirus;s__Popoffvirus pv56 [dsDNA]	32.5	_	_	_	_	COG5362|COG5410	S	_	_
B1Y__10721_1	47	_	_	_	_	_	_	_	_	_	_	_
B1Y__10721_2	92	_	_	_	_	_	_	_	_	_	_	_
B1Y__10721_3	533	major capsid protein VP1	d__Viruses;p__norank;c__norank;o__norank;f__Microviridae;g__norank;s__Microviridae Fen7918	34.6	sp|P11333|CAPSD_SPV4	Capsid protein VP1 OS=Spiroplasma virus 4 OX=10855 GN=ORF1 PE=1 SV=1	29.2	_	_	_	_	_
B1Y__1073_1	276	_	_	_	_	_	_	_	_	_	_	_
B1Y__1073_2	628	_	_	_	_	_	_	_	_	_	_	_
B1Y__1073_3	63	_	_	_	_	_	_	_	_	_	_	_
B1Y__1073_4	32	_	_	_	_	_	_	_	_	_	_	_
B1Y__1073_5	412	_	_	_	_	_	_	_	_	_	_	_
B1Y__1073_6	126	_	_	_	_	_	_	_	_	_	_	_
B1Y__1073_7	358	_	_	_	_	_	_	_	_	_	_	_
B1Y__10747_1	128	_	_	_	_	_	_	_	_	_	_	_
B1Y__10747_10	147	_	_	_	_	_	_	_	_	_	_	_
B1Y__10747_2	113	_	_	_	_	_	_	_	_	_	_	_
B1Y__10747_3	37	_	_	_	_	_	_	_	_	_	_	_
B1Y__10747_4	71	_	_	_	_	_	_	_	_	_	_	_
B1Y__10747_5	74	_	_	_	_	_	_	_	_	_	_	_
B1Y__10747_6	182	_	_	_	_	_	_	_	_	_	_	_
B1Y__10747_7	37	_	_	_	_	_	_	_	_	_	_	_
B1Y__10747_8	299	_	_	_	_	_	_	_	_	_	_	_
B1Y__10747_9	100	_	_	_	_	_	_	_	_	_	_	_
B1Y__10751_1	43	_	_	_	_	_	_	_	_	_	_	_
B1Y__10751_2	80	_	_	_	_	_	_	_	_	_	_	_
B1Y__10751_3	40	_	_	_	_	_	_	_	_	_	_	_
B1Y__10751_4	62	_	_	_	_	_	_	_	_	_	_	_
B1Y__10751_5	90	_	_	_	_	_	_	_	_	_	_	_
B1Y__10757_1	34	_	_	_	_	_	_	_	_	_	_	_
B1Y__10757_2	77	_	_	_	_	_	_	_	_	_	_	_
B1Y__10757_3	566	capsid protein	d__Viruses;p__norank;c__norank;o__norank;f__Microviridae;g__Spiromicrovirus;s__Spiromicrovirus SpV4 [ssDNA]	38	sp|P11333|CAPSD_SPV4	Capsid protein VP1 OS=Spiroplasma virus 4 OX=10855 GN=ORF1 PE=1 SV=1	38	_	_	_	_	_
B1Y__10757_4	197	_	_	_	_	_	_	_	_	_	_	_
B1Y__10757_5	283	replication initiation protein	d__Viruses;p__norank;c__norank;o__norank;f__Microviridae;g__Enterogokushovirus;s__Enterogokushovirus EC6098 [ssDNA]	35.3	_	_	_	_	_	_	_	_
B1Y__10757_6	59	_	_	_	_	_	_	_	_	_	_	_
B1Y__10757_7	175	_	_	_	_	_	_	_	_	_	_	_
B1Y__10757_8	55	_	_	_	_	_	_	_	_	_	_	_
B1Y__10757_9	20	_	_	_	_	_	_	_	_	_	_	_
B1Y__10761_1	67	_	_	_	_	_	_	_	_	_	_	_
B1Y__10761_2	127	_	_	_	_	_	_	_	_	_	_	_
B1Y__10761_3	42	_	_	_	_	_	_	_	_	_	_	_
B1Y__10761_4	99	_	_	_	_	_	_	_	_	_	_	_
B1Y__10761_5	63	_	_	_	_	_	_	_	_	_	_	_
B1Y__10761_6	72	_	_	_	_	_	_	_	_	_	_	_
B1Y__10761_7	51	_	_	_	_	_	_	_	_	_	_	_
B1Y__10761_8	103	_	_	_	_	_	_	_	_	_	_	_
B1Y__10761_9	97	hypothetical protein	d__Viruses;p__norank;c__norank;o__norank;f__norank;g__Latrobevirus;s__Latrobevirus FNU1 [dsDNA]	48.4	_	_	_	_	_	_	_	_
B1Y__10798_1	30	_	_	_	_	_	_	_	_	_	_	_
B1Y__10798_10	155	_	_	_	_	_	_	_	_	_	_	_
B1Y__10798_2	376	endolysin	d__Viruses;p__norank;c__norank;o__norank;f__norank;g__Rimavirus;s__Rimavirus drgrey [dsDNA]	37.7	_	_	_	GO:0005575;GO:0005623;GO:0007155;GO:0008150;GO:0009279;GO:0009405;GO:0009987;GO:0016020;GO:0019867;GO:0022610;GO:0030260;GO:0030312;GO:0030313;GO:0031589;GO:0031975;GO:0042710;GO:0043708;GO:0044403;GO:0044409;GO:0044419;GO:0044462;GO:0044464;GO:0044764;GO:0051701;GO:0051704;GO:0051806;GO:0051828;GO:0071944;GO:0090605	COG3103	T	_	_
B1Y__10798_3	89	DUF6275 family protein	d__Viruses;p__norank;c__norank;o__norank;f__Siphoviridae;g__norank;s__Lactococcus phage PLgT-1 [dsDNA]	43.5	_	_	_	_	_	_	_	_
B1Y__10798_4	71	_	_	_	_	_	_	_	_	_	_	_
B1Y__10798_5	150	_	_	_	_	_	_	_	_	_	_	_
B1Y__10798_6	84	_	_	_	_	_	_	_	_	_	_	_
B1Y__10798_7	159	DUF1617 family protein	d__Viruses;p__norank;c__norank;o__norank;f__Siphoviridae;g__norank;s__Streptococcus phage phiNIH1.1 [dsDNA]	32.3	_	_	_	_	_	_	_	_
B1Y__10798_8	2119	tail protein	d__Viruses;p__norank;c__norank;o__norank;f__norank;g__Iaduovirus;s__Iaduovirus iA2 [dsDNA]	55.6	_	_	_	_	_	_	_	_
B1Y__10798_9	246	tail protein	d__Viruses;p__norank;c__norank;o__norank;f__Siphoviridae;g__norank;s__Lactobacillus phage Lv-1 [dsDNA]	24.3	_	_	_	GO:0005575;GO:0019012;GO:0044423;GO:0098015	_	_	_	_
B1Y__10799_1	142	_	_	_	_	_	_	_	_	_	_	_
B1Y__10799_2	265	_	_	_	_	_	_	_	_	_	_	_
B1Y__10799_3	149	holin family protein	d__Viruses;p__norank;c__norank;o__norank;f__norank;g__Camtrevirus;s__Camtrevirus CM3 [dsDNA]	46.8	sp|P58701|Y383_CLOPE	Uncharacterized protein CPE0383 OS=Clostridium perfringens (strain 13 / Type A) OX=195102 GN=CPE0383 PE=3 SV=1	38.8	GO:0005575;GO:0018995;GO:0033643;GO:0033644;GO:0043657;GO:0044215;GO:0044216;GO:0044217;GO:0044218;GO:0044279	_	_	_	_
B1Y__10799_4	137	_	_	_	_	_	_	_	_	_	_	_
B1Y__10799_5	187	_	_	_	_	_	_	_	_	_	_	_
B1Y__10813_1	557	major capsid protein	d__Viruses;p__norank;c__norank;o__norank;f__Microviridae;g__norank;s__Lynx canadensis associated microvirus CLP 9413 [ssDNA]	61.6	sp|Q9G059|CAPSD_BPPHM	Capsid protein VP1 OS=Bdellovibrio phage phiMH2K OX=145579 GN=ORF1 PE=3 SV=1	41.5	_	_	_	_	_
B1Y__10813_2	147	minor capsid protein	d__Viruses;p__norank;c__norank;o__norank;f__Microviridae;g__norank;s__Alces alces faeces associated microvirus MP18 4940 [ssDNA]	35.2	_	_	_	_	_	_	_	_
B1Y__10813_3	86	_	_	_	_	_	_	_	_	_	_	_
B1Y__10813_4	197	_	_	_	_	_	_	_	_	_	K01448	amiABC
B1Y__10813_5	60	_	_	_	_	_	_	_	_	_	_	_
B1Y__10813_6	327	replication initiation protein	d__Viruses;p__norank;c__norank;o__norank;f__Microviridae;g__norank;s__Alces alces faeces associated microvirus MP18 4940 [ssDNA]	40	_	_	_	_	_	_	_	_
B1Y__10813_7	56	_	_	_	_	_	_	_	_	_	_	_
B1Y__10813_8	213	minor CP 2	d__Viruses;p__norank;c__norank;o__norank;f__Microviridae;g__norank;s__Chimpanzee faeces associated microphage 3 [ssDNA]	80.6	_	_	_	_	_	_	_	_
B1Y__10813_9	43	major CP	d__Viruses;p__norank;c__norank;o__norank;f__Microviridae;g__norank;s__Chimpanzee faeces associated microphage 2 [ssDNA]	78	_	_	_	_	_	_	_	_
B1Y__10817_1	151	tail tape measure protein	d__Viruses;p__norank;c__norank;o__norank;f__norank;g__Agmunavirus;s__Agmunavirus AGM1 [dsDNA]	50.6	_	_	_	_	COG5283	D	_	_
B1Y__10817_2	376	hypothetical protein	d__Viruses;p__norank;c__norank;o__norank;f__norank;g__Audreyjarvisvirus;s__Audreyjarvisvirus AM1 [dsDNA]	35.4	sp|Q91FL7|VF307_IIV6	Uncharacterized protein 307L OS=Invertebrate iridescent virus 6 OX=176652 GN=IIV6-307L PE=3 SV=1	44.6	_	_	_	_	_
B1Y__10817_3	35	_	_	_	_	_	_	_	_	_	_	_
B1Y__10822_1	23	_	_	_	_	_	_	_	_	_	_	_
B1Y__10822_2	280	_	_	_	_	_	_	_	_	_	_	_
B1Y__10822_3	140	_	_	_	_	_	_	_	_	_	_	_
B1Y__10822_4	662	major capsid protein VP1	d__Viruses;p__norank;c__norank;o__norank;f__Microviridae;g__norank;s__Microviridae Fen7786	28.5	_	_	_	_	_	_	_	_
B1Y__10822_5	81	_	_	_	_	_	_	_	_	_	_	_
B1Y__10822_6	278	replication initiation protein	d__Viruses;p__norank;c__norank;o__norank;f__Microviridae;g__norank;s__Alces alces faeces associated microvirus MP15 5067 [ssDNA]	30.4	_	_	_	_	_	_	_	_
B1Y__10822_7	100	_	_	_	_	_	_	_	_	_	_	_
B1Y__10822_8	76	_	_	_	_	_	_	_	_	_	_	_
B1Y__10822_9	86	_	_	_	_	_	_	_	_	_	_	_
B1Y__10892_1	650	hypothetical protein	d__Viruses;p__norank;c__norank;o__norank;f__norank;g__Spbetavirus;s__Spbetavirus SPbeta [dsDNA]	47.6	sp|O64076|YONO_BPSPB	DNA-directed RNA polymerase YonO OS=Bacillus phage SPbeta OX=66797 GN=yonO PE=3 SV=1	47.6	_	_	_	_	_
B1Y__10892_2	357	gp330	d__Viruses;p__norank;c__norank;o__norank;f__norank;g__Donellivirus;s__Donellivirus gee [dsDNA]	51.1	_	_	_	_	_	_	_	_
B1Y__10892_3	214	_	_	_	_	_	_	_	_	_	_	_
B1Y__10892_4	476	hypothetical protein	d__Viruses;p__norank;c__norank;o__norank;f__Siphoviridae;g__norank;s__Clostridium phage c-st [dsDNA]	29.7	sp|Q86A79|CPSF3_DICDI	Cleavage and polyadenylation specificity factor subunit 3 OS=Dictyostelium discoideum OX=44689 GN=cpsf3 PE=3 SV=1	24.7	_	COG1236	J	_	_
B1Y__10892_5	61	_	_	_	_	_	_	_	_	_	_	_
B1Y__10892_6	397	hypothetical protein	d__Viruses;p__norank;c__norank;o__norank;f__norank;g__Spbetavirus;s__Spbetavirus SPbeta [dsDNA]	37.5	sp|O31948|YONJ_BACSU	SPbeta prophage-derived uncharacterized protein YonJ OS=Bacillus subtilis (strain 168) OX=224308 GN=yonJ PE=4 SV=2	37.5	_	_	_	_	_
B1Y__10892_7	274	_	_	_	_	_	_	_	_	_	_	_
B1Y__10893_1	60	_	_	_	_	_	_	_	_	_	_	_
B1Y__10893_10	491	nicotinate phosphoribosyltransferase	d__Viruses;p__norank;c__norank;o__norank;f__Herelleviridae;g__Kayvirus;s__Kayvirus G1 [dsDNA]	37.1	sp|P43490|NAMPT_HUMAN	Nicotinamide phosphoribosyltransferase OS=Homo sapiens OX=9606 GN=NAMPT PE=1 SV=1	29.1	_	_	_	K03462	NAMPT
B1Y__10893_11	259	_	_	_	_	_	_	_	_	_	K07074	K07074
B1Y__10893_12	216	_	_	_	_	_	_	_	_	_	_	_
B1Y__10893_13	168	hypothetical protein	d__Viruses;p__norank;c__norank;o__norank;f__norank;g__norank;s__Nitrincola phage 1M3-16 [dsDNA]	31.8	_	_	_	_	COG2110	S	_	_
B1Y__10893_14	86	_	_	_	_	_	_	_	_	_	_	_
B1Y__10893_15	183	_	_	_	_	_	_	_	_	_	_	_
B1Y__10893_16	65	_	_	_	_	_	_	_	_	_	_	_
B1Y__10893_17	124	_	_	_	_	_	_	_	_	_	_	_
B1Y__10893_18	258	_	_	_	sp|C6A5B5|NADE_THESM	NH(3)-dependent NAD(+) synthetase OS=Thermococcus sibiricus (strain MM 739 / DSM 12597) OX=604354 GN=nadE PE=3 SV=1	39.8	_	_	_	_	_
B1Y__10893_19	234	_	_	_	_	_	_	_	_	_	_	_
B1Y__10893_2	147	hypothetical protein	d__Viruses;p__norank;c__norank;o__norank;f__norank;g__Otagovirus;s__Otagovirus Psa374 [dsDNA]	39.9	sp|Q05280|VG66_BPML5	Gene 66 protein OS=Mycobacterium phage L5 OX=31757 GN=66 PE=4 SV=1	33.8	_	_	_	_	_
B1Y__10893_20	181	putative deoxyUTP pyrophosphatase	d__Viruses;p__norank;c__norank;o__norank;f__Demerecviridae;g__Shenzhenvirus;s__Shenzhenvirus AhSzw1 [dsDNA]	47.3	sp|B4S912|DUT_PROA2	Deoxyuridine 5'-triphosphate nucleotidohydrolase OS=Prosthecochloris aestuarii (strain DSM 271 / SK 413) OX=290512 GN=dut PE=3 SV=1	30.1	GO:0003674;GO:0003824;GO:0004170;GO:0016462;GO:0016787;GO:0016817;GO:0016818;GO:0047429	_	_	K01520	dut, DUT
B1Y__10893_21	51	_	_	_	_	_	_	_	_	_	_	_
B1Y__10893_22	34	_	_	_	_	_	_	_	_	_	_	_
B1Y__10893_3	62	_	_	_	_	_	_	_	_	_	_	_
B1Y__10893_4	117	_	_	_	_	_	_	_	_	_	_	_
B1Y__10893_5	185	_	_	_	_	_	_	_	_	_	_	_
B1Y__10893_6	60	_	_	_	_	_	_	_	_	_	_	_
B1Y__10893_7	272	putative ribose-phosphate pyrophosphokinase	d__Viruses;p__norank;c__norank;o__norank;f__Herelleviridae;g__Wphvirus;s__Wphvirus BPS10C [dsDNA]	35.7	sp|Q4J9A6|KPRS_SULAC	Ribose-phosphate pyrophosphokinase OS=Sulfolobus acidocaldarius (strain ATCC 33909 / DSM 639 / JCM 8929 / NBRC 15157 / NCIMB 11770) OX=330779 GN=prs PE=3 SV=1	26.3	_	_	_	K00948	PRPS, prsA
B1Y__10893_8	47	_	_	_	_	_	_	_	_	_	_	_
B1Y__10893_9	99	_	_	_	_	_	_	_	_	_	_	_
B1Y__10923_1	227	minor CP 2	d__Viruses;p__norank;c__norank;o__norank;f__Microviridae;g__norank;s__Chimpanzee faeces associated microphage 3 [ssDNA]	68	_	_	_	_	_	_	_	_
B1Y__10923_2	353	replication initiation protein	d__Viruses;p__norank;c__norank;o__norank;f__Microviridae;g__norank;s__Alces alces faeces associated microvirus MP18 4940 [ssDNA]	42.3	_	_	_	_	_	_	_	_
B1Y__10923_3	38	_	_	_	_	_	_	_	_	_	_	_
B1Y__10923_4	52	_	_	_	_	_	_	_	_	_	_	_
B1Y__10923_5	89	_	_	_	_	_	_	_	_	_	_	_
B1Y__10923_6	173	minor capsid protein	d__Viruses;p__norank;c__norank;o__norank;f__Microviridae;g__norank;s__Lynx canadensis associated microvirus CLP 9413 [ssDNA]	57.3	_	_	_	_	_	_	_	_
B1Y__10923_7	553	major capsid protein	d__Viruses;p__norank;c__norank;o__norank;f__Microviridae;g__norank;s__Lynx canadensis associated microvirus CLP 9413 [ssDNA]	68	sp|P19192|CAPSD_BPCHP	Capsid protein VP1 OS=Chlamydia phage 1 OX=2003327 GN=ORF1 PE=1 SV=2	42.4	_	_	_	_	_
B1Y__10923_8	46	_	_	_	_	_	_	_	_	_	_	_
B1Y__10994_1	164	_	_	_	_	_	_	_	_	_	_	_
B1Y__10994_10	241	_	_	_	_	_	_	_	_	_	_	_
B1Y__10994_2	147	_	_	_	_	_	_	_	_	_	_	_
B1Y__10994_3	149	_	_	_	_	_	_	_	_	_	_	_
B1Y__10994_4	86	_	_	_	_	_	_	_	_	_	_	_
B1Y__10994_5	81	_	_	_	_	_	_	_	_	_	_	_
B1Y__10994_6	137	_	_	_	_	_	_	_	_	_	_	_
B1Y__10994_7	296	spike protein/glycoprotein	d__Viruses;p__norank;c__norank;o__norank;f__norank;g__norank;s__crAssphage cr1	36.2	_	_	_	_	_	_	_	_
B1Y__10994_8	49	_	_	_	_	_	_	_	_	_	_	_
B1Y__10994_9	109	_	_	_	_	_	_	_	_	_	_	_
B1Y__1099_1	270	_	_	_	_	_	_	_	_	_	_	_
B1Y__1099_2	73	_	_	_	_	_	_	_	_	_	_	_
B1Y__1099_3	32	_	_	_	_	_	_	_	_	_	_	_
B1Y__1099_4	483	replication initiation protein	d__Viruses;p__norank;c__norank;o__norank;f__Microviridae;g__norank;s__Alces alces faeces associated microvirus MP15 5067 [ssDNA]	24.6	_	_	_	_	_	_	_	_
B1Y__11033_1	147	recombination protein RecT	d__Viruses;p__norank;c__norank;o__norank;f__Siphoviridae;g__norank;s__Bacillus phage SPP1 [dsDNA]	47.3	sp|P33228|RECT_ECOLI	Protein RecT OS=Escherichia coli (strain K12) OX=83333 GN=recT PE=1 SV=1	42.6	_	_	_	K07455	recT
B1Y__11033_2	143	putative ssDNA binding protein	d__Viruses;p__norank;c__norank;o__norank;f__Siphoviridae;g__norank;s__Geobacillus virus E2 [dsDNA]	44.6	sp|P37455|SSBA_BACSU	Single-stranded DNA-binding protein A OS=Bacillus subtilis (strain 168) OX=224308 GN=ssbA PE=1 SV=1	42.6	_	_	_	K03111	ssb
B1Y__11033_3	102	_	_	_	_	_	_	_	_	_	_	_
B1Y__11033_4	126	_	_	_	_	_	_	_	_	_	K01160	rusA
B1Y__11033_5	250	_	_	_	_	_	_	_	_	_	_	_
B1Y__11033_6	44	_	_	_	_	_	_	_	_	_	_	_
B1Y__11033_7	145	adenine methyltransferase	d__Viruses;p__norank;c__norank;o__norank;f__norank;g__Skunavirus;s__Skunavirus MV10L [dsDNA]	61.9	_	_	_	_	_	_	_	_
B1Y__11033_8	73	_	_	_	_	_	_	_	_	_	_	_
B1Y__11033_9	217	_	_	_	_	_	_	_	_	_	_	_
B1Y__11042_1	68	_	_	_	_	_	_	_	_	_	_	_
B1Y__11042_10	44	_	_	_	_	_	_	_	_	_	_	_
B1Y__11042_11	28	_	_	_	_	_	_	_	_	_	_	_
B1Y__11042_2	110	_	_	_	_	_	_	_	_	_	_	_
B1Y__11042_3	70	_	_	_	_	_	_	_	_	_	_	_
B1Y__11042_4	71	_	_	_	_	_	_	_	_	_	_	_
B1Y__11042_5	445	_	_	_	_	_	_	_	_	_	_	_
B1Y__11042_6	58	_	_	_	_	_	_	_	_	_	_	_
B1Y__11042_7	84	_	_	_	_	_	_	_	_	_	_	_
B1Y__11042_8	207	_	_	_	_	_	_	_	_	_	_	_
B1Y__11042_9	254	_	_	_	_	_	_	_	_	_	_	_
B1Y__11053_1	41	_	_	_	_	_	_	_	_	_	_	_
B1Y__11053_2	40	_	_	_	_	_	_	_	_	_	_	_
B1Y__11053_3	106	_	_	_	_	_	_	_	_	_	_	_
B1Y__11053_4	319	_	_	_	_	_	_	_	_	_	_	_
B1Y__11088_1	697	_	_	_	_	_	_	_	_	_	_	_
B1Y__11098_1	68	_	_	_	_	_	_	_	_	_	_	_
B1Y__11098_2	415	replication protein VP4	d__Viruses;p__norank;c__norank;o__norank;f__Microviridae;g__norank;s__Gokushovirinae GNX3R [ssDNA]	33.6	_	_	_	_	_	_	_	_
B1Y__11098_3	613	major CP	d__Viruses;p__norank;c__norank;o__norank;f__Microviridae;g__norank;s__Chimpanzee faeces associated microphage 2 [ssDNA]	32.4	sp|Q9G059|CAPSD_BPPHM	Capsid protein VP1 OS=Bdellovibrio phage phiMH2K OX=145579 GN=ORF1 PE=3 SV=1	32.2	_	_	_	_	_
B1Y__11098_4	144	_	_	_	_	_	_	_	_	_	_	_
B1Y__11098_5	36	_	_	_	_	_	_	_	_	_	_	_
B1Y__11098_6	82	_	_	_	_	_	_	_	_	_	_	_
B1Y__11098_7	73	_	_	_	_	_	_	_	_	_	_	_
B1Y__11098_8	150	DNA pilot protein VP2	d__Viruses;p__norank;c__norank;o__norank;f__Microviridae;g__norank;s__Gokushovirinae GAIR4 [ssDNA]	65.9	_	_	_	_	_	_	_	_
B1Y__1109_1	871	putative RNA-polymerase subunit	d__Viruses;p__norank;c__norank;o__norank;f__norank;g__norank;s__crAssphage cr85	87.3	_	_	_	_	_	_	_	_
B1Y__11107_1	425	hypothetical protein	d__Viruses;p__norank;c__norank;o__norank;f__Siphoviridae;g__norank;s__Bacillus phage vB	39.7	_	_	_	_	COG4733	S	_	_
B1Y__11107_2	270	hypothetical protein	d__Viruses;p__norank;c__norank;o__norank;f__Herelleviridae;g__Goettingenvirus;s__Goettingenvirus goe8 [dsDNA]	33.3	_	_	_	_	_	_	_	_
B1Y__11108_1	41	_	_	_	_	_	_	_	_	_	_	_
B1Y__11108_2	146	_	_	_	_	_	_	_	_	_	_	_
B1Y__11108_3	279	tyrosine integrase	d__Viruses;p__norank;c__norank;o__norank;f__norank;g__Brujitavirus;s__Brujitavirus brujita [dsDNA]	21.6	sp|Q980D9|XERA_SACS2	Tyrosine recombinase XerA OS=Saccharolobus solfataricus (strain ATCC 35092 / DSM 1617 / JCM 11322 / P2) OX=273057 GN=xerA PE=1 SV=1	25.5	GO:0006139;GO:0006259;GO:0006725;GO:0006807;GO:0008150;GO:0008152;GO:0009987;GO:0015074;GO:0034641;GO:0043170;GO:0044237;GO:0044238;GO:0044260;GO:0046483;GO:0071704;GO:0090304;GO:1901360	_	_	_	_
B1Y__11108_4	67	_	_	_	_	_	_	_	_	_	_	_
B1Y__11108_5	92	putative DNA-binding protein	d__Viruses;p__norank;c__norank;o__norank;f__Ackermannviridae;g__Tedavirus;s__Tedavirus A829 [dsDNA]	43.2	sp|Q2SCF7|IHFB_HAHCH	Integration host factor subunit beta OS=Hahella chejuensis (strain KCTC 2396) OX=349521 GN=ihfB PE=3 SV=1	45.1	_	COG0776	L	_	_
B1Y__11109_1	73	_	_	_	_	_	_	_	_	_	_	_
B1Y__11109_10	57	_	_	_	_	_	_	_	_	_	_	_
B1Y__11109_11	57	_	_	_	_	_	_	_	_	_	_	_
B1Y__11109_12	54	_	_	_	_	_	_	_	_	_	_	_
B1Y__11109_13	53	_	_	_	_	_	_	_	_	_	_	_
B1Y__11109_14	136	terminase small subunit	d__Viruses;p__norank;c__norank;o__norank;f__Siphoviridae;g__norank;s__Streptococcus phage IC1 [dsDNA]	55.4	_	_	_	_	COG3728	L	K07474	xtmA
B1Y__11109_15	464	terminase family protein	d__Viruses;p__norank;c__norank;o__norank;f__Siphoviridae;g__norank;s__Enterococcus phage EFC-1 [dsDNA]	66.1	_	_	_	_	_	_	K06909	xtmB
B1Y__11109_16	380	portal protein	d__Viruses;p__norank;c__norank;o__norank;f__Siphoviridae;g__norank;s__Streptococcus phage SMP [dsDNA]	51.9	_	_	_	GO:0005575;GO:0019012;GO:0019028;GO:0032991;GO:0044423;GO:0046729;GO:0046798	_	_	_	_
B1Y__11109_2	143	_	_	_	_	_	_	_	_	_	_	_
B1Y__11109_3	101	_	_	_	_	_	_	_	_	_	_	_
B1Y__11109_4	62	putative restriction alleviation protein	d__Viruses;p__norank;c__norank;o__norank;f__Siphoviridae;g__norank;s__Geobacillus virus E3 [dsDNA]	42.9	_	_	_	_	_	_	_	_
B1Y__11109_5	46	_	_	_	_	_	_	_	_	_	_	_
B1Y__11109_6	65	_	_	_	_	_	_	_	_	_	_	_
B1Y__11109_7	50	_	_	_	_	_	_	_	_	_	_	_
B1Y__11109_8	94	protein of unknown function DUF3310	d__Viruses;p__norank;c__norank;o__norank;f__Siphoviridae;g__norank;s__Clostridium phage phiCP13O [dsDNA]	57.6	_	_	_	_	_	_	_	_
B1Y__11109_9	52	_	_	_	_	_	_	_	_	_	_	_
B1Y__1110_1	194	_	_	_	_	_	_	_	_	_	_	_
B1Y__1110_2	376	endolysin	d__Viruses;p__norank;c__norank;o__norank;f__norank;g__Saundersvirus;s__Saundersvirus Tp84 [dsDNA]	26	sp|P25310|LYSM1_STRGL	Lysozyme M1 OS=Streptomyces globisporus OX=1908 GN=acm PE=1 SV=1	27.2	GO:0005575;GO:0005576;GO:0005622;GO:0005623;GO:0005737;GO:0044424;GO:0044464	COG1388|COG3757	G	K07273	acm
B1Y__1110_3	271	putative peptidase	d__Viruses;p__norank;c__norank;o__norank;f__Herelleviridae;g__Grisebachstrassevirus;s__Grisebachstrassevirus goe3 [dsDNA]	34.4	sp|P00781|SUBD_BACLI	Subtilisin DY OS=Bacillus licheniformis OX=1402 GN=apr PE=1 SV=1	37.5	_	COG1404	O	_	_
B1Y__1110_4	233	_	_	_	_	_	_	_	_	_	_	_
B1Y__11115_1	744	anaerobic ribonucleoside triphosphate reductase	d__Viruses;p__norank;c__norank;o__norank;f__Siphoviridae;g__norank;s__Clostridium phage phiCD211 [dsDNA]	33.4	sp|P07071|NRDD_BPT4	Anaerobic ribonucleoside-triphosphate reductase OS=Enterobacteria phage T4 OX=10665 GN=nrdD PE=1 SV=4	31.1	_	_	_	K21636	nrdD
B1Y__11115_2	169	anaerobic ribonucleoside-triphosphate reductase activating protein	d__Viruses;p__norank;c__norank;o__norank;f__norank;g__Eneladusvirus;s__Eneladusvirus Yen904 [dsDNA]	45.8	sp|P07075|NRDG_BPT4	Anaerobic ribonucleoside-triphosphate reductase-activating protein OS=Enterobacteria phage T4 OX=10665 GN=NRDG PE=3 SV=1	45.6	_	_	_	K04068	nrdG
B1Y__11115_3	55	_	_	_	_	_	_	_	_	_	_	_
B1Y__11116_1	96	_	_	_	_	_	_	_	_	_	_	_
B1Y__11116_2	595	putative virion structural protein 12	d__Viruses;p__norank;c__norank;o__norank;f__norank;g__Seoulvirus;s__Seoulvirus SPN3US [dsDNA]	32.1	_	_	_	_	_	_	_	_
B1Y__11116_3	230	_	_	_	_	_	_	_	_	_	_	_
B1Y__11116_4	117	_	_	_	_	_	_	_	_	_	_	_
B1Y__11116_5	55	_	_	_	_	_	_	_	_	_	_	_
B1Y__11116_6	130	gp21	d__Viruses;p__norank;c__norank;o__norank;f__Siphoviridae;g__norank;s__Brochothrix phage NF5 [dsDNA]	37.5	_	_	_	_	_	_	_	_
B1Y__11116_7	87	_	_	_	_	_	_	_	_	_	_	_
B1Y__11116_8	294	N-acetylmuramoyl-L-alanine amidase	d__Viruses;p__norank;c__norank;o__norank;f__norank;g__Kamchatkavirus;s__Kamchatkavirus AP45 [dsDNA]	35.5	_	_	_	_	COG3409|COG5632	M	_	_
B1Y__11195_1	190	minor CP 2	d__Viruses;p__norank;c__norank;o__norank;f__Microviridae;g__norank;s__Chimpanzee faeces associated microphage 2 [ssDNA]	82.4	_	_	_	_	_	_	_	_
B1Y__11195_2	546	major capsid protein	d__Viruses;p__norank;c__norank;o__norank;f__Microviridae;g__norank;s__Lynx canadensis associated microvirus CLP 9413 [ssDNA]	63.4	sp|P11333|CAPSD_SPV4	Capsid protein VP1 OS=Spiroplasma virus 4 OX=10855 GN=ORF1 PE=1 SV=1	46.6	_	_	_	_	_
B1Y__11195_3	166	minor capsid protein	d__Viruses;p__norank;c__norank;o__norank;f__Microviridae;g__norank;s__Lynx canadensis associated microvirus CLP 9413 [ssDNA]	40	_	_	_	_	_	_	_	_
B1Y__11195_4	76	_	_	_	_	_	_	_	_	_	_	_
B1Y__11195_5	38	_	_	_	_	_	_	_	_	_	_	_
B1Y__11195_6	70	_	_	_	_	_	_	_	_	_	_	_
B1Y__11195_7	331	replication initiation protein	d__Viruses;p__norank;c__norank;o__norank;f__Microviridae;g__norank;s__Alces alces faeces associated microvirus MP18 4940 [ssDNA]	40.4	sp|P11334|REP_SPV4	Replication-associated protein ORF2 OS=Spiroplasma virus 4 OX=10855 GN=ORF2 PE=3 SV=1	36	_	_	_	_	_
B1Y__11195_8	46	_	_	_	_	_	_	_	_	_	_	_
B1Y__11195_9	174	_	_	_	_	_	_	_	_	_	_	_
B1Y__11222_1	112	_	_	_	_	_	_	_	_	_	_	_
B1Y__11222_2	105	_	_	_	_	_	_	_	_	_	_	_
B1Y__11222_3	562	_	_	_	_	_	_	_	_	_	_	_
B1Y__11222_4	111	_	_	_	_	_	_	_	_	_	_	_
B1Y__11222_5	95	_	_	_	_	_	_	_	_	_	_	_
B1Y__11222_6	90	_	_	_	_	_	_	_	_	_	_	_
B1Y__11222_7	498	_	_	_	_	_	_	_	_	_	_	_
B1Y__11222_8	86	_	_	_	_	_	_	_	_	_	_	_
B1Y__11222_9	609	_	_	_	_	_	_	_	_	_	_	_
B1Y__11232_1	60	_	_	_	_	_	_	_	_	_	_	_
B1Y__11232_2	552	_	_	_	_	_	_	_	_	_	_	_
B1Y__11235_1	267	recombinase RecT	d__Viruses;p__norank;c__norank;o__norank;f__Myoviridae;g__norank;s__Streptococcus phage EJ-1 [dsDNA]	51.7	_	_	_	_	COG3723	L	K07455	recT
B1Y__11235_10	83	_	_	_	_	_	_	_	_	_	_	_
B1Y__11235_11	179	_	_	_	_	_	_	_	_	_	_	_
B1Y__11235_12	85	_	_	_	_	_	_	_	_	_	_	_
B1Y__11235_13	123	endodeoxyribonuclease	d__Viruses;p__norank;c__norank;o__norank;f__Siphoviridae;g__norank;s__Lactobacillus phage phig1e [dsDNA]	49.6	_	_	_	_	_	_	K01160	rusA
B1Y__11235_14	179	single-stranded DNA-binding protein	d__Viruses;p__norank;c__norank;o__norank;f__Siphoviridae;g__norank;s__Streptococcus phage 20617 [dsDNA]	61.5	sp|Q839Y9|SSB_ENTFA	Single-stranded DNA-binding protein OS=Enterococcus faecalis (strain ATCC 700802 / V583) OX=226185 GN=ssb PE=3 SV=1	60.8	_	_	_	K03111	ssb
B1Y__11235_2	310	PD-(D/E)XK nuclease-like domain-containing protein	d__Viruses;p__norank;c__norank;o__norank;f__norank;g__Lafunavirus;s__Lafunavirus LF1 [dsDNA]	37	_	_	_	_	COG1074	L	_	_
B1Y__11235_3	331	replisome organizer N-terminal domain-containing protein	d__Viruses;p__norank;c__norank;o__norank;f__Siphoviridae;g__norank;s__Listeria phage A500 [dsDNA]	51.1	_	_	_	_	_	_	_	_
B1Y__11235_4	275	ATP-binding protein	d__Viruses;p__norank;c__norank;o__norank;f__Siphoviridae;g__norank;s__Lactobacillus phage phig1e [dsDNA]	35.9	_	_	_	_	COG1484	L	K02315	dnaC
B1Y__11235_5	81	_	_	_	_	_	_	_	_	_	_	_
B1Y__11235_6	73	_	_	_	_	_	_	_	_	_	_	_
B1Y__11235_7	50	_	_	_	_	_	_	_	_	_	_	_
B1Y__11235_8	150	_	_	_	_	_	_	_	_	_	_	_
B1Y__11235_9	75	_	_	_	_	_	_	_	_	_	_	_
B1Y__11247_1	21	_	_	_	_	_	_	_	_	_	_	_
B1Y__11247_2	48	_	_	_	_	_	_	_	_	_	_	_
B1Y__11247_3	340	replication initiation protein	d__Viruses;p__norank;c__norank;o__norank;f__Microviridae;g__norank;s__Lynx canadensis associated microvirus CLP 9413 [ssDNA]	49.4	_	_	_	_	_	_	_	_
B1Y__11247_4	270	_	_	_	_	_	_	_	_	_	_	_
B1Y__11247_5	552	major capsid protein	d__Viruses;p__norank;c__norank;o__norank;f__Microviridae;g__norank;s__Lynx canadensis associated microvirus CLP 9413 [ssDNA]	69.3	sp|P11333|CAPSD_SPV4	Capsid protein VP1 OS=Spiroplasma virus 4 OX=10855 GN=ORF1 PE=1 SV=1	44.1	_	_	_	_	_
B1Y__11247_6	161	minor CP 1	d__Viruses;p__norank;c__norank;o__norank;f__Microviridae;g__norank;s__Chimpanzee faeces associated microphage 2 [ssDNA]	43.4	_	_	_	_	_	_	_	_
B1Y__11247_7	90	_	_	_	_	_	_	_	_	_	_	_
B1Y__11255_1	172	minor capsid protein	d__Viruses;p__norank;c__norank;o__norank;f__Microviridae;g__norank;s__Lynx canadensis associated microvirus CLP 9413 [ssDNA]	49	_	_	_	_	_	_	_	_
B1Y__11255_2	84	nonstructural protein	d__Viruses;p__norank;c__norank;o__norank;f__Microviridae;g__norank;s__Alces alces faeces associated microvirus MP18 4940 [ssDNA]	50	_	_	_	_	_	_	_	_
B1Y__11255_3	36	_	_	_	_	_	_	_	_	_	_	_
B1Y__11255_4	38	_	_	_	_	_	_	_	_	_	_	_
B1Y__11255_5	356	replication initiator protein	d__Viruses;p__norank;c__norank;o__norank;f__Microviridae;g__norank;s__Chimpanzee faeces associated microphage 2 [ssDNA]	51.7	sp|P11334|REP_SPV4	Replication-associated protein ORF2 OS=Spiroplasma virus 4 OX=10855 GN=ORF2 PE=3 SV=1	34	_	_	_	_	_
B1Y__11255_6	36	_	_	_	_	_	_	_	_	_	_	_
B1Y__11255_7	275	minor capsid protein	d__Viruses;p__norank;c__norank;o__norank;f__Microviridae;g__norank;s__Lynx canadensis associated microvirus CLP 9413 [ssDNA]	57.8	_	_	_	_	_	_	_	_
B1Y__11255_8	558	major capsid protein	d__Viruses;p__norank;c__norank;o__norank;f__Microviridae;g__norank;s__Lynx canadensis associated microvirus CLP 9413 [ssDNA]	70.5	sp|P19192|CAPSD_BPCHP	Capsid protein VP1 OS=Chlamydia phage 1 OX=2003327 GN=ORF1 PE=1 SV=2	42.9	_	_	_	_	_
B1Y__11255_9	39	_	_	_	_	_	_	_	_	_	_	_
B1Y__11289_1	252	regulatory protein	d__Viruses;p__norank;c__norank;o__norank;f__norank;g__norank;s__crAssphage cr114	70.4	_	_	_	_	_	_	_	_
B1Y__11289_2	296	_	_	_	_	_	_	_	_	_	_	_
B1Y__11301_1	60	_	_	_	_	_	_	_	_	_	_	_
B1Y__11301_2	166	_	_	_	_	_	_	_	_	_	_	_
B1Y__11301_3	175	hypothetical protein	d__Viruses;p__norank;c__norank;o__norank;f__norank;g__Nipunavirus;s__Nipunavirus NP1 [dsDNA]	44.4	_	_	_	_	_	_	_	_
B1Y__11301_4	249	ATPase	d__Viruses;p__norank;c__norank;o__norank;f__norank;g__Amoyvirus;s__Amoyvirus R7M [dsDNA]	49	_	_	_	_	_	_	_	_
B1Y__11301_5	152	_	_	_	_	_	_	_	_	_	_	_
B1Y__11301_6	38	_	_	_	_	_	_	_	_	_	_	_
B1Y__11337_1	64	_	_	_	_	_	_	_	_	_	_	_
B1Y__11337_2	135	_	_	_	_	_	_	_	_	_	_	_
B1Y__11337_3	133	_	_	_	_	_	_	_	_	_	_	_
B1Y__11337_4	349	major capsid protein	d__Viruses;p__norank;c__norank;o__norank;f__norank;g__norank;s__Dragonfly-associated microphage 1 [ssDNA]	40.1	_	_	_	_	_	_	_	_
B1Y__11345_1	109	_	_	_	_	_	_	_	_	_	_	_
B1Y__11345_2	241	_	_	_	_	_	_	_	_	_	_	_
B1Y__11345_3	52	_	_	_	_	_	_	_	_	_	_	_
B1Y__11345_4	314	replication initiation protein	d__Viruses;p__norank;c__norank;o__norank;f__Microviridae;g__norank;s__Alces alces faeces associated microvirus MP12 5423 [ssDNA]	30.7	_	_	_	_	_	_	_	_
B1Y__11345_5	232	_	_	_	_	_	_	_	_	_	_	_
B1Y__11391_1	88	_	_	_	_	_	_	_	_	_	_	_
B1Y__11391_2	141	minor capsid protein	d__Viruses;p__norank;c__norank;o__norank;f__Microviridae;g__Bdellomicrovirus;s__Bdellomicrovirus MH2K [ssDNA]	38.2	sp|Q9G053|B_BPPHM	Internal scaffolding protein VP3 OS=Bdellovibrio phage phiMH2K OX=145579 GN=ORF3 PE=3 SV=1	38.2	_	_	_	_	_
B1Y__11391_3	312	replication protein VP4	d__Viruses;p__norank;c__norank;o__norank;f__Microviridae;g__norank;s__Gokushovirinae GNX3R [ssDNA]	52.9	sp|Q9G050|REP_BPPHM	Replication-associated protein VP4 OS=Bdellovibrio phage phiMH2K OX=145579 GN=ORF4 PE=3 SV=1	30.9	_	_	_	_	_
B1Y__11391_4	87	nonstructural protein	d__Viruses;p__norank;c__norank;o__norank;f__Microviridae;g__Bdellomicrovirus;s__Bdellomicrovirus MH2K [ssDNA]	35.4	sp|Q9G052|C_BPPHM	Protein VP5 OS=Bdellovibrio phage phiMH2K OX=145579 GN=ORF5 PE=3 SV=1	35.4	_	_	_	_	_
B1Y__11391_5	103	major capsid protein VP1	d__Viruses;p__norank;c__norank;o__norank;f__Microviridae;g__norank;s__Gokushovirinae Bog1183	69.5	sp|P19192|CAPSD_BPCHP	Capsid protein VP1 OS=Chlamydia phage 1 OX=2003327 GN=ORF1 PE=1 SV=2	64.5	_	_	_	_	_
B1Y__11392_1	138	_	_	_	_	_	_	_	_	_	_	_
B1Y__11392_2	100	_	_	_	_	_	_	_	_	_	_	_
B1Y__11392_3	145	hypothetical protein	d__Viruses;p__norank;c__norank;o__norank;f__Siphoviridae;g__norank;s__Geobacillus virus E3 [dsDNA]	36.4	_	_	_	_	_	_	_	_
B1Y__11392_4	205	_	_	_	_	_	_	_	_	_	_	_
B1Y__11392_5	340	hypothetical protein	d__Viruses;p__norank;c__norank;o__norank;f__Siphoviridae;g__norank;s__Bacillus phage vB	27.6	_	_	_	_	_	_	_	_
B1Y__11392_6	170	_	_	_	_	_	_	_	_	_	_	_
B1Y__11392_7	331	_	_	_	_	_	_	_	_	_	_	_
B1Y__11424_1	760	ribonucleotide reductase of class II	d__Viruses;p__norank;c__norank;o__norank;f__Schitoviridae;g__Pomeroyivirus;s__Pomeroyivirus V13 [dsDNA]	31.8	sp|P9WH76|NRDZ_MYCTO	Vitamin B12-dependent ribonucleoside-diphosphate reductase OS=Mycobacterium tuberculosis (strain CDC 1551 / Oshkosh) OX=83331 GN=nrdZ PE=2 SV=1	30.9	GO:0001959;GO:0001960;GO:0003674;GO:0003824;GO:0004748;GO:0005575;GO:0008150;GO:0008152;GO:0009966;GO:0009968;GO:0010646;GO:0010648;GO:0010803;GO:0010804;GO:0016491;GO:0016725;GO:0016728;GO:0018995;GO:0023051;GO:0023057;GO:0030430;GO:0033643;GO:0033646;GO:0043656;GO:0043657;GO:0044215;GO:0044216;GO:0044217;GO:0048519;GO:0048523;GO:0048583;GO:0048585;GO:0050789;GO:0050794;GO:0055114;GO:0060759;GO:…	_	_	K00525	E1.17.4.1A, nrdA, nrdE
B1Y__11424_2	94	_	_	_	_	_	_	_	_	_	_	_
B1Y__11434_1	38	_	_	_	_	_	_	_	_	_	_	_
B1Y__11434_2	74	_	_	_	_	_	_	_	_	_	_	_
B1Y__11434_3	109	_	_	_	_	_	_	_	_	_	_	_
B1Y__11434_4	154	_	_	_	_	_	_	_	_	_	_	_
B1Y__11434_5	133	_	_	_	_	_	_	_	_	_	_	_
B1Y__11434_6	109	_	_	_	_	_	_	_	_	_	_	_
B1Y__11434_7	148	_	_	_	_	_	_	_	_	_	_	_
B1Y__11434_8	155	_	_	_	_	_	_	_	_	_	_	_
B1Y__11449_1	203	_	_	_	_	_	_	_	_	_	_	_
B1Y__11449_2	138	_	_	_	_	_	_	_	_	_	_	_
B1Y__11449_3	666	hypothetical protein	d__Viruses;p__norank;c__norank;o__norank;f__norank;g__Astrithrvirus;s__Astrithrvirus astrithr [dsDNA]	32.7	_	_	_	GO:0003674;GO:0003824;GO:0003887;GO:0006139;GO:0006259;GO:0006725;GO:0006807;GO:0008150;GO:0008152;GO:0009058;GO:0009059;GO:0009987;GO:0016032;GO:0016740;GO:0016772;GO:0016779;GO:0018130;GO:0019058;GO:0019079;GO:0019438;GO:0034061;GO:0034641;GO:0034645;GO:0034654;GO:0039687;GO:0039693;GO:0043170;GO:0044237;GO:0044238;GO:0044249;GO:0044260;GO:0044271;GO:0044403;GO:0044419;GO:0046483;GO:0051704;GO:…	_	_	_	_
B1Y__11455_1	79	_	_	_	_	_	_	_	_	_	_	_
B1Y__11455_2	286	minor capsid protein	d__Viruses;p__norank;c__norank;o__norank;f__Microviridae;g__norank;s__Lynx canadensis associated microvirus CLP 9413 [ssDNA]	48.1	_	_	_	_	_	_	_	_
B1Y__11455_3	561	major capsid protein	d__Viruses;p__norank;c__norank;o__norank;f__Microviridae;g__norank;s__Lynx canadensis associated microvirus CLP 9413 [ssDNA]	69.1	sp|P11333|CAPSD_SPV4	Capsid protein VP1 OS=Spiroplasma virus 4 OX=10855 GN=ORF1 PE=1 SV=1	43.2	_	_	_	_	_
B1Y__11455_4	62	_	_	_	_	_	_	_	_	_	_	_
B1Y__11455_5	44	_	_	_	_	_	_	_	_	_	_	_
B1Y__11455_6	139	minor capsid protein	d__Viruses;p__norank;c__norank;o__norank;f__Microviridae;g__norank;s__Lynx canadensis associated microvirus CLP 9413 [ssDNA]	48.7	_	_	_	_	_	_	_	_
B1Y__11455_7	88	_	_	_	_	_	_	_	_	_	_	_
B1Y__11455_8	38	_	_	_	_	_	_	_	_	_	_	_
B1Y__11455_9	308	replication initiator protein	d__Viruses;p__norank;c__norank;o__norank;f__Microviridae;g__norank;s__Chimpanzee faeces associated microphage 2 [ssDNA]	50.2	_	_	_	_	_	_	_	_
B1Y__11456_1	277	hypothetical protein	d__Viruses;p__norank;c__norank;o__norank;f__norank;g__Badaztecvirus;s__Badaztecvirus badaargau2 [dsDNA]	67.6	_	_	_	_	_	_	_	_
B1Y__11456_2	936	_	_	_	_	_	_	_	_	_	_	_
B1Y__11456_3	176	_	_	_	_	_	_	_	_	_	_	_
B1Y__11456_4	561	DNA polymerase	d__Viruses;p__norank;c__norank;o__norank;f__Salasmaviridae;g__Beecentumtrevirus;s__Beecentumtrevirus B103 [dsDNA]	46.6	sp|Q37882|DPOL_BPB03	DNA polymerase OS=Bacillus phage B103 OX=10778 GN=2 PE=3 SV=1	46.6	GO:0003674;GO:0003824;GO:0003887;GO:0006139;GO:0006259;GO:0006725;GO:0006807;GO:0008150;GO:0008152;GO:0009058;GO:0009059;GO:0009987;GO:0016032;GO:0016740;GO:0016772;GO:0016779;GO:0018130;GO:0019058;GO:0019079;GO:0019438;GO:0034061;GO:0034641;GO:0034645;GO:0034654;GO:0039687;GO:0039693;GO:0043170;GO:0044237;GO:0044238;GO:0044249;GO:0044260;GO:0044271;GO:0044403;GO:0044419;GO:0046483;GO:0051704;GO:…	_	_	K21237	gp2
B1Y__11456_5	194	_	_	_	_	_	_	_	_	_	_	_
B1Y__11456_6	27	_	_	_	_	_	_	_	_	_	_	_
B1Y__1148_1	607	major capsid protein VP1	d__Viruses;p__norank;c__norank;o__norank;f__Microviridae;g__norank;s__Microviridae Bog1249	27.2	_	_	_	_	_	_	_	_
B1Y__1148_2	58	_	_	_	_	_	_	_	_	_	_	_
B1Y__11509_1	227	major capsid protein VP1	d__Viruses;p__norank;c__norank;o__norank;f__Microviridae;g__norank;s__Microviridae Fen7918	45.5	_	_	_	_	_	_	_	_
B1Y__11509_2	300	_	_	_	_	_	_	_	_	_	_	_
B1Y__11509_3	135	_	_	_	_	_	_	_	_	_	_	_
B1Y__11509_4	94	_	_	_	_	_	_	_	_	_	_	_
B1Y__1151_1	264	_	_	_	_	_	_	_	_	_	_	_
B1Y__1151_2	198	_	_	_	_	_	_	_	_	_	_	_
B1Y__1151_3	137	_	_	_	_	_	_	_	_	_	_	_
B1Y__11550_1	48	_	_	_	_	_	_	_	_	_	_	_
B1Y__11550_2	467	hypothetical protein	d__Viruses;p__norank;c__norank;o__norank;f__norank;g__norank;s__crAssphage cr53	43.3	_	_	_	_	_	_	_	_
B1Y__11550_3	122	_	_	_	_	_	_	_	_	_	_	_
B1Y__11552_1	155	replication initiation protein	d__Viruses;p__norank;c__norank;o__norank;f__Microviridae;g__norank;s__Alces alces faeces associated microvirus MP18 4940 [ssDNA]	44	_	_	_	_	_	_	_	_
B1Y__11552_2	283	minor capsid protein	d__Viruses;p__norank;c__norank;o__norank;f__Microviridae;g__norank;s__Lynx canadensis associated microvirus CLP 9413 [ssDNA]	56.9	_	_	_	_	_	_	_	_
B1Y__11552_3	556	major capsid protein	d__Viruses;p__norank;c__norank;o__norank;f__Microviridae;g__norank;s__Lynx canadensis associated microvirus CLP 9413 [ssDNA]	69.1	sp|P19192|CAPSD_BPCHP	Capsid protein VP1 OS=Chlamydia phage 1 OX=2003327 GN=ORF1 PE=1 SV=2	40.3	_	_	_	_	_
B1Y__11552_4	159	minor capsid protein	d__Viruses;p__norank;c__norank;o__norank;f__Microviridae;g__norank;s__Lynx canadensis associated microvirus CLP 9413 [ssDNA]	49.2	_	_	_	_	_	_	_	_
B1Y__11552_5	86	nonstructural protein	d__Viruses;p__norank;c__norank;o__norank;f__Microviridae;g__norank;s__Alces alces faeces associated microvirus MP18 4940 [ssDNA]	45.3	_	_	_	_	_	_	_	_
B1Y__11552_6	37	_	_	_	_	_	_	_	_	_	_	_
B1Y__11552_7	240	replication initiation protein	d__Viruses;p__norank;c__norank;o__norank;f__Microviridae;g__norank;s__Lynx canadensis associated microvirus CLP 9413 [ssDNA]	51.1	_	_	_	_	_	_	_	_
B1Y__1156_1	759	tape measure protein	d__Viruses;p__norank;c__norank;o__norank;f__norank;g__Scapunavirus;s__Scapunavirus scap1 [dsDNA]	29.3	_	_	_	_	COG5412	S	_	_
B1Y__11576_1	37	_	_	_	_	_	_	_	_	_	_	_
B1Y__11576_2	55	_	_	_	_	_	_	_	_	_	_	_
B1Y__11576_3	43	_	_	_	_	_	_	_	_	_	_	_
B1Y__11576_4	66	MAG hypothetical protein	d__Viruses;p__norank;c__norank;o__norank;f__norank;g__norank;s__CrAssphage sp. [dsDNA]	65.6	_	_	_	_	_	_	_	_
B1Y__11576_5	116	MAG hypothetical protein	d__Viruses;p__norank;c__norank;o__norank;f__norank;g__norank;s__CrAssphage sp. [dsDNA]	47.8	_	_	_	_	_	_	_	_
B1Y__11576_6	42	_	_	_	_	_	_	_	_	_	_	_
B1Y__11591_1	80	_	_	_	_	_	_	_	_	_	_	_
B1Y__11591_2	557	major capsid protein VP1	d__Viruses;p__norank;c__norank;o__norank;f__Microviridae;g__norank;s__Microviridae Fen7918	23.9	_	_	_	_	_	_	_	_
B1Y__11598_1	695	hypothetical protein	d__Viruses;p__norank;c__norank;o__norank;f__norank;g__Astrithrvirus;s__Astrithrvirus astrithr [dsDNA]	25.8	_	_	_	GO:0003674;GO:0003824;GO:0003887;GO:0006139;GO:0006259;GO:0006725;GO:0006807;GO:0008150;GO:0008152;GO:0009058;GO:0009059;GO:0009987;GO:0016032;GO:0016740;GO:0016772;GO:0016779;GO:0018130;GO:0019058;GO:0019079;GO:0019438;GO:0034061;GO:0034641;GO:0034645;GO:0034654;GO:0039687;GO:0039693;GO:0043170;GO:0044237;GO:0044238;GO:0044249;GO:0044260;GO:0044271;GO:0044403;GO:0044419;GO:0046483;GO:0051704;GO:…	_	_	_	_
B1Y__11598_2	396	_	_	_	_	_	_	_	_	_	_	_
B1Y__11598_3	664	_	_	_	_	_	_	_	_	_	_	_
B1Y__11598_4	222	putative endolysin	d__Viruses;p__norank;c__norank;o__norank;f__norank;g__Arawnvirus;s__Arawnvirus arawn [dsDNA]	36.8	_	_	_	_	COG1388|COG1705	NU	K02395	flgJ
B1Y__11598_5	149	_	_	_	_	_	_	_	_	_	_	_
B1Y__11598_6	221	_	_	_	_	_	_	_	_	_	_	_
B1Y__11598_7	222	_	_	_	_	_	_	_	_	_	_	_
B1Y__11598_8	50	_	_	_	_	_	_	_	_	_	_	_
B1Y__11614_1	167	tail knob protein	d__Viruses;p__norank;c__norank;o__norank;f__Salasmaviridae;g__Huangshavirus;s__Huangshavirus dlcuna [dsDNA]	36	_	_	_	_	_	_	_	_
B1Y__11614_2	319	upper collar connector	d__Viruses;p__norank;c__norank;o__norank;f__Salasmaviridae;g__Beecentumtrevirus;s__Beecentumtrevirus Goe1 [dsDNA]	36	sp|Q37891|PORTL_BPB03	Portal protein OS=Bacillus phage B103 OX=10778 GN=10 PE=3 SV=1	34.9	GO:0005575;GO:0008150;GO:0016032;GO:0019012;GO:0019028;GO:0019058;GO:0019068;GO:0019072;GO:0019073;GO:0032991;GO:0044403;GO:0044419;GO:0044423;GO:0046729;GO:0046798;GO:0051704	_	_	_	_
B1Y__11614_3	204	hypothetical protein	d__Viruses;p__norank;c__norank;o__norank;f__norank;g__Badaztecvirus;s__Badaztecvirus badaargau2 [dsDNA]	29.3	_	_	_	_	_	_	_	_
B1Y__11614_4	204	_	_	_	_	_	_	_	_	_	_	_
B1Y__11614_5	391	_	_	_	_	_	_	_	_	_	_	_
B1Y__11614_6	54	_	_	_	_	_	_	_	_	_	_	_
B1Y__11614_7	104	hypothetical protein	d__Viruses;p__norank;c__norank;o__norank;f__Guelinviridae;g__Brucesealvirus;s__Brucesealvirus CPS2 [dsDNA]	43.2	sp|Q67JC7|SP5G_SYMTH	Putative septation protein SpoVG OS=Symbiobacterium thermophilum (strain T / IAM 14863) OX=292459 GN=spoVG PE=3 SV=2	40	_	_	_	K06412	spoVG
B1Y__11614_8	34	_	_	_	_	_	_	_	_	_	_	_
B1Y__11616_1	275	minor CP 2	d__Viruses;p__norank;c__norank;o__norank;f__Microviridae;g__norank;s__Chimpanzee faeces associated microphage 3 [ssDNA]	48.6	sp|Q9G055|H_BPPHM	Minor spike protein H OS=Bdellovibrio phage phiMH2K OX=145579 GN=ORF2 PE=3 SV=1	50.6	_	_	_	_	_
B1Y__11616_2	564	major capsid protein	d__Viruses;p__norank;c__norank;o__norank;f__Microviridae;g__norank;s__Lynx canadensis associated microvirus CLP 9413 [ssDNA]	58.9	sp|P11333|CAPSD_SPV4	Capsid protein VP1 OS=Spiroplasma virus 4 OX=10855 GN=ORF1 PE=1 SV=1	39.8	_	_	_	_	_
B1Y__11616_3	152	_	_	_	_	_	_	_	_	_	_	_
B1Y__11616_4	103	_	_	_	_	_	_	_	_	_	_	_
B1Y__11616_5	35	_	_	_	_	_	_	_	_	_	_	_
B1Y__11616_6	40	_	_	_	_	_	_	_	_	_	_	_
B1Y__11616_7	346	replication protein VP4	d__Viruses;p__norank;c__norank;o__norank;f__Microviridae;g__norank;s__Gokushovirinae Fen672	33.7	_	_	_	_	_	_	_	_
B1Y__11616_8	52	_	_	_	_	_	_	_	_	_	_	_
B1Y__11635_1	98	_	_	_	_	_	_	_	_	_	_	_
B1Y__11635_2	376	_	_	_	_	_	_	_	_	_	_	_
B1Y__11635_3	367	replication-associated protein	d__Viruses;p__norank;c__norank;o__norank;f__norank;g__norank;s__Millipede associated circular virus 1 [ssDNA]	25.2	_	_	_	GO:0008150;GO:0016032;GO:0019058;GO:0019079;GO:0039682;GO:0039684;GO:0039687;GO:0039693;GO:0044403;GO:0044419;GO:0051704	_	_	_	_
B1Y__11635_4	50	_	_	_	_	_	_	_	_	_	_	_
B1Y__11637_1	79	_	_	_	_	_	_	_	_	_	_	_
B1Y__11637_2	118	_	_	_	_	_	_	_	_	_	_	_
B1Y__11637_3	130	_	_	_	_	_	_	_	_	_	_	_
B1Y__11637_4	73	_	_	_	_	_	_	_	_	_	_	_
B1Y__11637_5	106	_	_	_	_	_	_	_	_	_	_	_
B1Y__11637_6	120	_	_	_	_	_	_	_	_	_	_	_
B1Y__11637_7	42	_	_	_	_	_	_	_	_	_	_	_
B1Y__11637_8	110	_	_	_	_	_	_	_	_	_	_	_
B1Y__11671_1	368	terminase large subunit	d__Viruses;p__norank;c__norank;o__norank;f__norank;g__Pepyhexavirus;s__Pepyhexavirus poco6 [dsDNA]	82.6	_	_	_	_	_	_	_	_
B1Y__11671_2	145	_	_	_	_	_	_	_	_	_	_	_
B1Y__11671_3	264	hypothetical protein	d__Viruses;p__norank;c__norank;o__norank;f__norank;g__Kenoshavirus;s__Kenoshavirus chikenjars [dsDNA]	27.1	_	_	_	_	_	_	_	_
B1Y__11671_4	128	hypothetical protein	d__Viruses;p__norank;c__norank;o__norank;f__norank;g__Gordonvirus;s__Gordonvirus gordon [dsDNA]	51.4	_	_	_	_	_	_	_	_
B1Y__11671_5	140	endonuclease	d__Viruses;p__norank;c__norank;o__norank;f__norank;g__Oengusvirus;s__Oengusvirus oengus [dsDNA]	53.1	_	_	_	_	_	_	_	_
B1Y__11681_1	94	major capsid protein	d__Viruses;p__norank;c__norank;o__norank;f__Microviridae;g__norank;s__Lynx canadensis associated microvirus CLP 9413 [ssDNA]	61.3	sp|Q9G059|CAPSD_BPPHM	Capsid protein VP1 OS=Bdellovibrio phage phiMH2K OX=145579 GN=ORF1 PE=3 SV=1	44.6	_	_	_	_	_
B1Y__11681_2	162	minor CP 1	d__Viruses;p__norank;c__norank;o__norank;f__Microviridae;g__norank;s__Chimpanzee faeces associated microphage 2 [ssDNA]	34.7	_	_	_	_	_	_	_	_
B1Y__11681_3	97	_	_	_	_	_	_	_	_	_	_	_
B1Y__11681_4	38	_	_	_	_	_	_	_	_	_	_	_
B1Y__11681_5	35	_	_	_	_	_	_	_	_	_	_	_
B1Y__11681_6	322	replication initiator protein	d__Viruses;p__norank;c__norank;o__norank;f__Microviridae;g__norank;s__Chimpanzee faeces associated microphage 2 [ssDNA]	43.2	sp|Q9G050|REP_BPPHM	Replication-associated protein VP4 OS=Bdellovibrio phage phiMH2K OX=145579 GN=ORF4 PE=3 SV=1	34.3	_	_	_	_	_
B1Y__11681_7	233	_	_	_	_	_	_	_	_	_	_	_
B1Y__11681_8	529	major capsid protein	d__Viruses;p__norank;c__norank;o__norank;f__Microviridae;g__norank;s__Lynx canadensis associated microvirus CLP 9413 [ssDNA]	52.4	_	_	_	_	_	_	_	_
B1Y__11728_1	359	_	_	_	_	_	_	_	_	_	_	_
B1Y__11728_10	51	_	_	_	_	_	_	_	_	_	_	_
B1Y__11728_11	184	_	_	_	_	_	_	_	_	_	_	_
B1Y__11728_12	80	_	_	_	_	_	_	_	_	_	_	_
B1Y__11728_2	54	_	_	_	_	_	_	_	_	_	_	_
B1Y__11728_3	53	_	_	_	_	_	_	_	_	_	_	_
B1Y__11728_4	158	_	_	_	_	_	_	_	_	_	_	_
B1Y__11728_5	50	_	_	_	_	_	_	_	_	_	_	_
B1Y__11728_6	56	_	_	_	_	_	_	_	_	_	_	_
B1Y__11728_7	65	_	_	_	_	_	_	_	_	_	_	_
B1Y__11728_8	50	_	_	_	_	_	_	_	_	_	_	_
B1Y__11728_9	211	_	_	_	_	_	_	_	_	_	_	_
B1Y__11734_1	557	capsid protein	d__Viruses;p__norank;c__norank;o__norank;f__Microviridae;g__Enterogokushovirus;s__Enterogokushovirus EC6098 [ssDNA]	47.9	sp|P19192|CAPSD_BPCHP	Capsid protein VP1 OS=Chlamydia phage 1 OX=2003327 GN=ORF1 PE=1 SV=2	42	_	_	_	_	_
B1Y__11734_2	118	_	_	_	_	_	_	_	_	_	_	_
B1Y__11744_1	624	major capsid protein	d__Viruses;p__norank;c__norank;o__norank;f__Microviridae;g__norank;s__Microviridae IME-16 [ssDNA]	30.3	_	_	_	_	_	_	_	_
B1Y__11744_2	33	_	_	_	_	_	_	_	_	_	_	_
B1Y__11745_1	193	replication initiation protein	d__Viruses;p__norank;c__norank;o__norank;f__Microviridae;g__norank;s__Alces alces faeces associated microvirus MP15 5067 [ssDNA]	48.8	_	_	_	_	_	_	_	_
B1Y__11745_2	261	_	_	_	_	_	_	_	_	_	_	_
B1Y__11745_3	119	_	_	_	_	_	_	_	_	_	_	_
B1Y__11745_4	554	major capsid protein VP1	d__Viruses;p__norank;c__norank;o__norank;f__Microviridae;g__norank;s__Microviridae Fen7918	34.7	sp|Q9G059|CAPSD_BPPHM	Capsid protein VP1 OS=Bdellovibrio phage phiMH2K OX=145579 GN=ORF1 PE=3 SV=1	30.4	_	_	_	_	_
B1Y__11784_1	201	_	_	_	_	_	_	_	_	_	_	_
B1Y__11784_10	87	_	_	_	_	_	_	_	_	_	_	_
B1Y__11784_11	124	_	_	_	_	_	_	_	_	_	_	_
B1Y__11784_2	121	_	_	_	_	_	_	_	_	_	_	_
B1Y__11784_3	48	_	_	_	_	_	_	_	_	_	_	_
B1Y__11784_4	365	_	_	_	_	_	_	_	_	_	_	_
B1Y__11784_5	111	_	_	_	_	_	_	_	_	_	_	_
B1Y__11784_6	203	_	_	_	_	_	_	_	_	_	_	_
B1Y__11784_7	69	_	_	_	_	_	_	_	_	_	_	_
B1Y__11784_8	37	_	_	_	_	_	_	_	_	_	_	_
B1Y__11784_9	41	_	_	_	_	_	_	_	_	_	_	_
B1Y__11793_1	94	_	_	_	_	_	_	_	_	_	_	_
B1Y__11793_2	98	_	_	_	_	_	_	_	_	_	_	_
B1Y__11793_3	138	_	_	_	_	_	_	_	_	_	_	_
B1Y__11793_4	138	_	_	_	_	_	_	_	_	_	_	_
B1Y__11793_5	324	_	_	_	_	_	_	_	_	_	_	_
B1Y__11801_1	307	putative intron endonuclease	d__Viruses;p__norank;c__norank;o__norank;f__Straboviridae;g__Lazarusvirus;s__Lazarusvirus lazarus [dsDNA]	44.8	sp|P16010|SEGC_BPT4	Putative endonuclease segC OS=Enterobacteria phage T4 OX=10665 GN=segC PE=4 SV=3	43.6	_	_	_	_	_
B1Y__11801_2	119	_	_	_	_	_	_	_	_	_	_	_
B1Y__11835_1	28	_	_	_	_	_	_	_	_	_	_	_
B1Y__11835_2	53	_	_	_	_	_	_	_	_	_	_	_
B1Y__11835_3	44	_	_	_	_	_	_	_	_	_	_	_
B1Y__11835_4	349	replication initiator protein	d__Viruses;p__norank;c__norank;o__norank;f__Microviridae;g__norank;s__Chimpanzee faeces associated microphage 2 [ssDNA]	47.6	sp|P11334|REP_SPV4	Replication-associated protein ORF2 OS=Spiroplasma virus 4 OX=10855 GN=ORF2 PE=3 SV=1	29.7	_	_	_	_	_
B1Y__11835_5	301	minor capsid protein	d__Viruses;p__norank;c__norank;o__norank;f__Microviridae;g__norank;s__Lynx canadensis associated microvirus CLP 9413 [ssDNA]	71.7	_	_	_	_	_	_	_	_
B1Y__11837_1	63	_	_	_	_	_	_	_	_	_	_	_
B1Y__11837_2	674	_	_	_	_	_	_	_	_	_	_	_
B1Y__11837_3	332	_	_	_	_	_	_	_	_	_	_	_
B1Y__11837_4	108	_	_	_	_	_	_	_	_	_	_	_
B1Y__11837_5	136	_	_	_	_	_	_	_	_	_	_	_
B1Y__1186_1	212	minor capsid protein	d__Viruses;p__norank;c__norank;o__norank;f__Microviridae;g__norank;s__Alces alces faeces associated microvirus MP12 5423 [ssDNA]	47.2	_	_	_	_	_	_	_	_
B1Y__1186_2	324	replication initiator protein	d__Viruses;p__norank;c__norank;o__norank;f__Microviridae;g__norank;s__Chimpanzee faeces associated microphage 2 [ssDNA]	39.1	_	_	_	_	_	_	_	_
B1Y__1186_3	38	_	_	_	_	_	_	_	_	_	_	_
B1Y__1186_4	93	_	_	_	_	_	_	_	_	_	_	_
B1Y__1186_5	40	_	_	_	_	_	_	_	_	_	_	_
B1Y__1186_6	153	_	_	_	_	_	_	_	_	_	_	_
B1Y__1186_7	572	major capsid protein	d__Viruses;p__norank;c__norank;o__norank;f__Microviridae;g__norank;s__Lynx canadensis associated microvirus CLP 9413 [ssDNA]	52	sp|Q9G059|CAPSD_BPPHM	Capsid protein VP1 OS=Bdellovibrio phage phiMH2K OX=145579 GN=ORF1 PE=3 SV=1	36.4	_	_	_	_	_
B1Y__1186_8	188	_	_	_	_	_	_	_	_	_	_	_
B1Y__11880_1	607	tail protein	d__Viruses;p__norank;c__norank;o__norank;f__Siphoviridae;g__norank;s__Streptococcus phage SMP [dsDNA]	44.8	_	_	_	GO:0008150;GO:0044403;GO:0044409;GO:0044411;GO:0044419;GO:0051701;GO:0051704;GO:0051828;GO:0051830;GO:0085027	COG1511|COG4926	S	_	_
B1Y__11880_2	258	tail family protein	d__Viruses;p__norank;c__norank;o__norank;f__Siphoviridae;g__norank;s__Streptococcus phage SMP [dsDNA]	43.5	_	_	_	_	COG4722	S	_	_
B1Y__11880_3	137	tape measure protein	d__Viruses;p__norank;c__norank;o__norank;f__Siphoviridae;g__norank;s__Lactobacillus phage LfeSau [dsDNA]	39.5	_	_	_	_	COG5283|COG5412	S	_	_
B1Y__11889_1	67	_	_	_	_	_	_	_	_	_	_	_
B1Y__11889_2	83	_	_	_	_	_	_	_	_	_	_	_
B1Y__11889_3	84	_	_	_	_	_	_	_	_	_	_	_
B1Y__11889_4	174	_	_	_	_	_	_	_	_	_	_	_
B1Y__11889_5	166	anaerobic ribonucleoside-triphosphate reductase activating protein	d__Viruses;p__norank;c__norank;o__norank;f__norank;g__Alcyoneusvirus;s__Alcyoneusvirus RaK2 [dsDNA]	34.2	sp|Q9KM76|NRDG_VIBCH	Anaerobic ribonucleoside-triphosphate reductase-activating protein OS=Vibrio cholerae serotype O1 (strain ATCC 39315 / El Tor Inaba N16961) OX=243277 GN=nrdG PE=3 SV=1	37.4	_	_	_	K04068	nrdG
B1Y__11889_6	118	anaerobic ribonucleotide reductase subunit	d__Viruses;p__norank;c__norank;o__norank;f__Straboviridae;g__Tulanevirus;s__Tulanevirus aes508 [dsDNA]	45	_	_	_	_	_	_	_	_
B1Y__11891_1	248	VOG5461	d__Viruses;p__norank;c__norank;o__norank;f__norank;g__norank;s__crAssphage cr6	30.9	_	_	_	_	_	_	_	_
B1Y__11891_2	525	DNA polymerase III subunit alpha	d__Viruses;p__norank;c__norank;o__norank;f__norank;g__Spbetavirus;s__Spbetavirus SPbeta [dsDNA]	36.3	sp|O31902|YORL_BACSU	Probable DNA polymerase YorL OS=Bacillus subtilis (strain 168) OX=224308 GN=yorL PE=3 SV=1	36.3	_	_	_	_	_
B1Y__11891_3	781	putative RecD/TraA family helicase	d__Viruses;p__norank;c__norank;o__norank;f__Siphoviridae;g__norank;s__Brevibacillus phage Sundance [dsDNA]	33.1	sp|O34481|RECDL_BACSU	ATP-dependent RecD-like DNA helicase OS=Bacillus subtilis (strain 168) OX=224308 GN=yrrC PE=3 SV=1	27.1	_	COG0507	L	K03581	recD
B1Y__11891_4	127	_	_	_	_	_	_	_	_	_	_	_
B1Y__11891_5	172	_	_	_	_	_	_	_	_	_	_	_
B1Y__11891_6	339	hypothetical protein	d__Viruses;p__norank;c__norank;o__norank;f__Siphoviridae;g__norank;s__Bacillus phage vB	27.5	_	_	_	_	_	_	_	_
B1Y__11891_7	51	_	_	_	_	_	_	_	_	_	_	_
B1Y__11893_1	99	_	_	_	_	_	_	_	_	_	_	_
B1Y__11893_10	66	_	_	_	_	_	_	_	_	_	_	_
B1Y__11893_11	76	_	_	_	_	_	_	_	_	_	_	_
B1Y__11893_12	393	_	_	_	_	_	_	_	_	_	_	_
B1Y__11893_13	565	_	_	_	_	_	_	_	_	_	_	_
B1Y__11893_14	400	_	_	_	_	_	_	_	_	_	_	_
B1Y__11893_2	103	_	_	_	_	_	_	_	_	_	_	_
B1Y__11893_3	48	_	_	_	_	_	_	_	_	_	_	_
B1Y__11893_4	96	_	_	_	_	_	_	_	_	_	_	_
B1Y__11893_5	110	_	_	_	_	_	_	_	_	_	_	_
B1Y__11893_6	52	_	_	_	_	_	_	_	_	_	_	_
B1Y__11893_7	124	_	_	_	_	_	_	_	_	_	_	_
B1Y__11893_8	67	_	_	_	_	_	_	_	_	_	_	_
B1Y__11893_9	65	_	_	_	_	_	_	_	_	_	_	_
B1Y__11909_1	564	hypothetical protein	d__Viruses;p__norank;c__norank;o__norank;f__norank;g__Astrithrvirus;s__Astrithrvirus astrithr [dsDNA]	56	_	_	_	GO:0003674;GO:0003824;GO:0003887;GO:0006139;GO:0006259;GO:0006725;GO:0006807;GO:0008150;GO:0008152;GO:0009058;GO:0009059;GO:0009987;GO:0016032;GO:0016740;GO:0016772;GO:0016779;GO:0018130;GO:0019058;GO:0019079;GO:0019438;GO:0034061;GO:0034641;GO:0034645;GO:0034654;GO:0039687;GO:0039693;GO:0043170;GO:0044237;GO:0044238;GO:0044249;GO:0044260;GO:0044271;GO:0044403;GO:0044419;GO:0046483;GO:0051704;GO:…	_	_	_	_
B1Y__11909_2	230	hypothetical protein	d__Viruses;p__norank;c__norank;o__norank;f__norank;g__Astrithrvirus;s__Astrithrvirus astrithr [dsDNA]	64.5	_	_	_	GO:0003674;GO:0003676;GO:0003723;GO:0003824;GO:0005488;GO:0008150;GO:0016032;GO:0016462;GO:0016787;GO:0016817;GO:0016818;GO:0016887;GO:0017111;GO:0019058;GO:0019068;GO:0019072;GO:0019073;GO:0044403;GO:0044419;GO:0051704;GO:0097159;GO:1901363	_	_	_	_
B1Y__11918_1	148	_	_	_	_	_	_	_	_	_	_	_
B1Y__11918_2	56	_	_	_	_	_	_	_	_	_	_	_
B1Y__11918_3	143	_	_	_	_	_	_	_	_	_	_	_
B1Y__11918_4	208	_	_	_	_	_	_	_	_	_	_	_
B1Y__11918_5	81	_	_	_	_	_	_	_	_	_	_	_
B1Y__11918_6	143	_	_	_	_	_	_	_	_	_	_	_
B1Y__11925_1	177	_	_	_	_	_	_	_	_	_	_	_
B1Y__11925_2	393	_	_	_	_	_	_	_	_	_	_	_
B1Y__11925_3	362	hypothetical protein	d__Viruses;p__norank;c__norank;o__norank;f__norank;g__Nankokuvirus;s__Nankokuvirus Ab03 [dsDNA]	32.8	_	_	_	GO:0005575;GO:0019012;GO:0044423;GO:0098015;GO:0098025	_	_	_	_
B1Y__11936_1	115	_	_	_	_	_	_	_	_	_	_	_
B1Y__11936_2	162	_	_	_	_	_	_	_	_	_	_	_
B1Y__11936_3	88	_	_	_	_	_	_	_	_	_	_	_
B1Y__11936_4	67	_	_	_	_	_	_	_	_	_	_	_
B1Y__11936_5	38	_	_	_	_	_	_	_	_	_	_	_
B1Y__11936_6	328	replication initiation protein	d__Viruses;p__norank;c__norank;o__norank;f__Microviridae;g__norank;s__Lynx canadensis associated microvirus CLP 9413 [ssDNA]	48.3	_	_	_	_	_	_	_	_
B1Y__11936_7	70	_	_	_	_	_	_	_	_	_	_	_
B1Y__11936_8	31	_	_	_	_	_	_	_	_	_	_	_
B1Y__11936_9	270	minor capsid protein	d__Viruses;p__norank;c__norank;o__norank;f__Microviridae;g__norank;s__Lynx canadensis associated microvirus CLP 9413 [ssDNA]	56.1	_	_	_	_	_	_	_	_
B1Y__11961_1	109	_	_	_	_	_	_	_	_	_	_	_
B1Y__11961_2	58	_	_	_	_	_	_	_	_	_	_	_
B1Y__11961_3	75	_	_	_	_	_	_	_	_	_	_	_
B1Y__11961_4	163	_	_	_	_	_	_	_	_	_	_	_
B1Y__11961_5	61	_	_	_	_	_	_	_	_	_	_	_
B1Y__11961_6	196	_	_	_	_	_	_	_	_	_	_	_
B1Y__11967_1	133	thymidylate synthase	d__Viruses;p__norank;c__norank;o__norank;f__Herelleviridae;g__Kochikohdavirus;s__Kochikohdavirus EF24C [dsDNA]	54.9	sp|Q5D189|TYSY_BACNA	Thymidylate synthase OS=Bacillus subtilis subsp. natto OX=86029 GN=thyA PE=3 SV=1	48.3	GO:0003674;GO:0003824;GO:0004799;GO:0008150;GO:0008152;GO:0008168;GO:0016740;GO:0016741;GO:0032259;GO:0042083	_	_	_	_
B1Y__11967_2	149	_	_	_	_	_	_	_	_	_	_	_
B1Y__11967_3	109	_	_	_	_	_	_	_	_	_	_	_
B1Y__11967_4	111	_	_	_	_	_	_	_	_	_	_	_
B1Y__11981_1	285	putative anaerobic ribonucleoside triphosphate reductase	d__Viruses;p__norank;c__norank;o__norank;f__norank;g__norank;s__crAssphage cr111	62.5	_	_	_	_	_	_	_	_
B1Y__11981_2	354	PD-(D/E)XK superfamily exonuclease	d__Viruses;p__norank;c__norank;o__norank;f__Steigviridae;g__Paundivirus;s__Paundivirus hollandii [dsDNA]	67.6	_	_	_	_	_	_	_	_
B1Y__11981_3	84	_	_	_	_	_	_	_	_	_	_	_
B1Y__11981_4	40	hypothetical protein	d__Viruses;p__norank;c__norank;o__norank;f__Steigviridae;g__Paundivirus;s__Paundivirus hollandii [dsDNA]	74.2	_	_	_	_	_	_	_	_
B1Y__11982_1	93	_	_	_	_	_	_	_	_	_	_	_
B1Y__11982_2	77	_	_	_	_	_	_	_	_	_	_	_
B1Y__11982_3	74	_	_	_	_	_	_	_	_	_	_	_
B1Y__11982_4	432	DNA replication initiation protein	d__Viruses;p__norank;c__norank;o__norank;f__Microviridae;g__norank;s__Microviridae phi-CA82 [ssDNA]	25.2	_	_	_	_	_	_	_	_
B1Y__11982_5	518	major capsid protein VP1	d__Viruses;p__norank;c__norank;o__norank;f__Microviridae;g__norank;s__Microviridae Bog9017	26.5	_	_	_	_	_	_	_	_
B1Y__11982_6	98	_	_	_	_	_	_	_	_	_	_	_
B1Y__11982_7	99	_	_	_	_	_	_	_	_	_	_	_
B1Y__11982_8	385	_	_	_	_	_	_	_	_	_	_	_
B1Y__11990_1	625	DNA-directed RNA polymerase subunit 1	d__Viruses;p__norank;c__norank;o__norank;f__Mimiviridae;g__Mimivirus;s__Megavirus chiliensis [dsDNA]	26.1	sp|A4IJI2|RPOC_GEOTN	DNA-directed RNA polymerase subunit beta' OS=Geobacillus thermodenitrificans (strain NG80-2) OX=420246 GN=rpoC PE=3 SV=2	60.2	GO:0008150;GO:0016032;GO:0019080;GO:0019083;GO:0039695;GO:0044403;GO:0044419;GO:0051704	_	_	K03046	rpoC
B1Y__11990_2	89	_	_	_	_	_	_	_	_	_	_	_
B1Y__1199_1	42	_	_	_	_	_	_	_	_	_	_	_
B1Y__1199_2	360	DNA pilot protein VP2	d__Viruses;p__norank;c__norank;o__norank;f__Microviridae;g__norank;s__Microviridae Fen7918	27.7	_	_	_	_	_	_	_	_
B1Y__1199_3	141	_	_	_	_	_	_	_	_	_	_	_
B1Y__1199_4	576	major capsid protein VP1	d__Viruses;p__norank;c__norank;o__norank;f__Microviridae;g__norank;s__Parabacteroides phage YZ-2015a [ssDNA]	28.8	_	_	_	_	_	_	_	_
B1Y__1199_5	533	_	_	_	_	_	_	_	_	_	_	_
B1Y__1199_6	98	_	_	_	_	_	_	_	_	_	_	_
B1Y__12003_1	221	hypothetical protein	d__Viruses;p__norank;c__norank;o__norank;f__norank;g__Brigitvirus;s__Brigitvirus brigit [dsDNA]	35.3	_	_	_	_	_	_	_	_
B1Y__12003_2	170	_	_	_	_	_	_	_	_	_	_	_
B1Y__12003_3	83	_	_	_	_	_	_	_	_	_	_	_
B1Y__12003_4	50	_	_	_	_	_	_	_	_	_	_	_
B1Y__12012_1	98	_	_	_	_	_	_	_	_	_	_	_
B1Y__12012_2	533	structural protein	d__Viruses;p__norank;c__norank;o__norank;f__Microviridae;g__Chlamydiamicrovirus;s__Chlamydiamicrovirus Chp2 [ssDNA]	53.6	sp|Q9G059|CAPSD_BPPHM	Capsid protein VP1 OS=Bdellovibrio phage phiMH2K OX=145579 GN=ORF1 PE=3 SV=1	49.3	_	_	_	_	_
B1Y__12012_3	149	internal scaffolding protein VP3	d__Viruses;p__norank;c__norank;o__norank;f__Microviridae;g__norank;s__Gokushovirinae GNX3R [ssDNA]	36.6	_	_	_	_	_	_	_	_
B1Y__12018_1	854	DUF5906 domain-containing protein	d__Viruses;p__norank;c__norank;o__norank;f__norank;g__Psavirus;s__Psavirus PSA [dsDNA]	43.3	_	_	_	_	COG3378|COG4983	L	_	_
B1Y__12018_2	95	_	_	_	_	_	_	_	_	_	_	_
B1Y__12028_1	133	_	_	_	_	_	_	_	_	_	_	_
B1Y__12028_2	94	_	_	_	_	_	_	_	_	_	_	_
B1Y__12028_3	105	_	_	_	_	_	_	_	_	_	_	_
B1Y__12028_4	373	major capsid protein VP1	d__Viruses;p__norank;c__norank;o__norank;f__Microviridae;g__norank;s__Microviridae Bog9017	25.6	_	_	_	_	_	_	_	_
B1Y__12053_1	346	replication protein VP4	d__Viruses;p__norank;c__norank;o__norank;f__Microviridae;g__norank;s__Gokushovirinae Fen672	32.7	_	_	_	_	_	_	_	_
B1Y__12053_2	35	_	_	_	_	_	_	_	_	_	_	_
B1Y__12053_3	35	_	_	_	_	_	_	_	_	_	_	_
B1Y__12053_4	102	_	_	_	_	_	_	_	_	_	_	_
B1Y__12053_5	150	_	_	_	_	_	_	_	_	_	_	_
B1Y__12053_6	579	major capsid protein	d__Viruses;p__norank;c__norank;o__norank;f__Microviridae;g__norank;s__Lynx canadensis associated microvirus CLP 9413 [ssDNA]	56.2	sp|Q9G059|CAPSD_BPPHM	Capsid protein VP1 OS=Bdellovibrio phage phiMH2K OX=145579 GN=ORF1 PE=3 SV=1	40.1	_	_	_	_	_
B1Y__12053_7	262	minor CP 2	d__Viruses;p__norank;c__norank;o__norank;f__Microviridae;g__norank;s__Chimpanzee faeces associated microphage 3 [ssDNA]	57	sp|Q9G055|H_BPPHM	Minor spike protein H OS=Bdellovibrio phage phiMH2K OX=145579 GN=ORF2 PE=3 SV=1	49.4	_	_	_	_	_
B1Y__12058_1	352	major capsid protein VP1	d__Viruses;p__norank;c__norank;o__norank;f__Microviridae;g__norank;s__Parabacteroides phage YZ-2015b [ssDNA]	35.8	_	_	_	_	_	_	_	_
B1Y__12058_2	287	replication initiation protein	d__Viruses;p__norank;c__norank;o__norank;f__Microviridae;g__norank;s__Alces alces faeces associated microvirus MP15 5067 [ssDNA]	30.9	_	_	_	_	_	_	_	_
B1Y__12060_1	64	_	_	_	_	_	_	_	_	_	_	_
B1Y__12060_10	57	_	_	_	_	_	_	_	_	_	_	_
B1Y__12060_11	255	SWI/SNF chromatin-remodeling complex subunit snf22	d__Viruses;p__norank;c__norank;o__norank;f__Siphoviridae;g__norank;s__Croceibacter phage P2559Y [dsDNA]	36.5	sp|Q9T1Q7|VP41_BPAPS	Putative protein p41 OS=Acyrthosiphon pisum secondary endosymbiont phage 1 OX=67571 GN=41 PE=4 SV=1	30.4	_	COG0553	L	_	_
B1Y__12060_2	99	_	_	_	_	_	_	_	_	_	_	_
B1Y__12060_3	127	_	_	_	_	_	_	_	_	_	_	_
B1Y__12060_4	65	_	_	_	_	_	_	_	_	_	_	_
B1Y__12060_5	159	_	_	_	_	_	_	_	_	_	_	_
B1Y__12060_6	82	_	_	_	_	_	_	_	_	_	_	_
B1Y__12060_7	288	_	_	_	_	_	_	_	_	_	_	_
B1Y__12060_8	44	_	_	_	_	_	_	_	_	_	_	_
B1Y__12060_9	463	_	_	_	_	_	_	_	_	_	_	_
B1Y__12078_1	462	phosphatase	d__Viruses;p__norank;c__norank;o__norank;f__Steigviridae;g__Paundivirus;s__Paundivirus hollandii [dsDNA]	38.4	_	_	_	_	_	_	_	_
B1Y__12078_2	155	MAG hypothetical protein	d__Viruses;p__norank;c__norank;o__norank;f__norank;g__norank;s__CrAssphage sp. [dsDNA]	50	_	_	_	_	_	_	_	_
B1Y__12078_3	67	_	_	_	_	_	_	_	_	_	_	_
B1Y__12078_4	58	putative pholin	d__Viruses;p__norank;c__norank;o__norank;f__norank;g__norank;s__crAssphage cr107	50.9	_	_	_	_	_	_	_	_
B1Y__12120_1	341	replication initiation protein	d__Viruses;p__norank;c__norank;o__norank;f__Microviridae;g__norank;s__Alces alces faeces associated microvirus MP18 4940 [ssDNA]	39.2	_	_	_	_	_	_	_	_
B1Y__12120_2	60	_	_	_	_	_	_	_	_	_	_	_
B1Y__12120_3	194	_	_	_	_	_	_	_	_	_	K01448	amiABC
B1Y__12120_4	82	_	_	_	_	_	_	_	_	_	_	_
B1Y__12120_5	151	minor capsid protein	d__Viruses;p__norank;c__norank;o__norank;f__Microviridae;g__norank;s__Alces alces faeces associated microvirus MP18 4940 [ssDNA]	32.9	_	_	_	_	_	_	_	_
B1Y__12120_6	558	major capsid protein	d__Viruses;p__norank;c__norank;o__norank;f__Microviridae;g__norank;s__Lynx canadensis associated microvirus CLP 9413 [ssDNA]	62.3	sp|Q9G059|CAPSD_BPPHM	Capsid protein VP1 OS=Bdellovibrio phage phiMH2K OX=145579 GN=ORF1 PE=3 SV=1	41.4	_	_	_	_	_
B1Y__12120_7	212	minor CP 2	d__Viruses;p__norank;c__norank;o__norank;f__Microviridae;g__norank;s__Chimpanzee faeces associated microphage 3 [ssDNA]	72.6	_	_	_	_	_	_	_	_
B1Y__12120_8	60	_	_	_	_	_	_	_	_	_	_	_
B1Y__12120_9	39	_	_	_	_	_	_	_	_	_	_	_
B1Y__12142_1	60	_	_	_	_	_	_	_	_	_	_	_
B1Y__12142_2	251	hypothetical protein	d__Viruses;p__norank;c__norank;o__norank;f__Herelleviridae;g__Kochikohdavirus;s__Kochikohdavirus EF24C [dsDNA]	44.3	_	_	_	_	_	_	_	_
B1Y__12142_3	156	hypothetical protein	d__Viruses;p__norank;c__norank;o__norank;f__Herelleviridae;g__Kochikohdavirus;s__Kochikohdavirus EF24C [dsDNA]	41.7	_	_	_	_	_	_	_	_
B1Y__12142_4	226	_	_	_	_	_	_	_	_	_	_	_
B1Y__12157_1	409	LysM peptidoglycan-binding domain-containing protein	d__Viruses;p__norank;c__norank;o__norank;f__Myoviridae;g__norank;s__Thermus phage phi OH2 [dsDNA]	68.3	sp|Q7A123|LYTN_STAAW	Probable cell wall hydrolase LytN OS=Staphylococcus aureus (strain MW2) OX=196620 GN=lytN PE=3 SV=2	65.9	GO:0005575;GO:0018995;GO:0020002;GO:0033643;GO:0033644;GO:0043657;GO:0044215;GO:0044216;GO:0044217;GO:0044218;GO:0044279	_	_	_	_
B1Y__12157_2	269	tape measure protein	d__Viruses;p__norank;c__norank;o__norank;f__norank;g__Scapunavirus;s__Scapunavirus scap1 [dsDNA]	35.6	_	_	_	_	COG5412	S	_	_
B1Y__12188_1	132	major capsid protein VP1	d__Viruses;p__norank;c__norank;o__norank;f__Microviridae;g__norank;s__Gokushovirinae Fen672	36.4	_	_	_	_	_	_	_	_
B1Y__12188_2	232	DNA pilot protein VP2	d__Viruses;p__norank;c__norank;o__norank;f__Microviridae;g__norank;s__Gokushovirinae GAIR4 [ssDNA]	53.8	_	_	_	_	_	_	_	_
B1Y__12188_3	341	replication initiator protein	d__Viruses;p__norank;c__norank;o__norank;f__Microviridae;g__norank;s__Chimpanzee faeces associated microphage 2 [ssDNA]	42.9	_	_	_	_	_	_	_	_
B1Y__12188_4	93	_	_	_	_	_	_	_	_	_	_	_
B1Y__12188_5	151	_	_	_	_	_	_	_	_	_	_	_
B1Y__12188_6	54	_	_	_	_	_	_	_	_	_	_	_
B1Y__12197_1	146	_	_	_	_	_	_	_	_	_	_	_
B1Y__12197_2	75	_	_	_	_	_	_	_	_	_	_	_
B1Y__12197_3	289	RecT family protein	d__Viruses;p__norank;c__norank;o__norank;f__Pachyviridae;g__Baltivirus;s__Baltivirus phi13duo [dsDNA]	32	_	_	_	_	_	_	K07455	recT
B1Y__12197_4	121	_	_	_	_	_	_	_	_	_	_	_
B1Y__12263_1	33	_	_	_	_	_	_	_	_	_	_	_
B1Y__12263_10	227	LysM peptidoglycan-binding domain-containing protein	d__Viruses;p__norank;c__norank;o__norank;f__Myoviridae;g__norank;s__Thermus phage phi OH2 [dsDNA]	47.5	_	_	_	GO:0005575;GO:0018995;GO:0020002;GO:0033643;GO:0033644;GO:0043657;GO:0044215;GO:0044216;GO:0044217;GO:0044218;GO:0044279	_	_	_	_
B1Y__12263_11	585	_	_	_	_	_	_	_	_	_	_	_
B1Y__12263_12	162	_	_	_	_	_	_	_	_	_	_	_
B1Y__12263_13	388	hypothetical protein	d__Viruses;p__norank;c__norank;o__norank;f__norank;g__Astrithrvirus;s__Astrithrvirus astrithr [dsDNA]	57.1	_	_	_	_	_	_	_	_
B1Y__12263_14	277	_	_	_	_	_	_	_	_	_	_	_
B1Y__12263_15	313	hypothetical protein	d__Viruses;p__norank;c__norank;o__norank;f__norank;g__Astrithrvirus;s__Astrithrvirus astrithr [dsDNA]	42	_	_	_	GO:0005575;GO:0008150;GO:0016032;GO:0019012;GO:0019028;GO:0019058;GO:0019068;GO:0019072;GO:0019073;GO:0032991;GO:0044403;GO:0044419;GO:0044423;GO:0046729;GO:0046798;GO:0051704	_	_	_	_
B1Y__12263_16	65	_	_	_	_	_	_	_	_	_	_	_
B1Y__12263_17	49	_	_	_	_	_	_	_	_	_	_	_
B1Y__12263_2	64	_	_	_	_	_	_	_	_	_	_	_
B1Y__12263_3	75	_	_	_	_	_	_	_	_	_	_	_
B1Y__12263_4	118	_	_	_	_	_	_	_	_	_	_	_
B1Y__12263_5	126	_	_	_	_	_	_	_	_	_	_	_
B1Y__12263_6	68	_	_	_	_	_	_	_	_	_	_	_
B1Y__12263_7	269	_	_	_	_	_	_	_	_	_	_	_
B1Y__12263_8	730	hypothetical protein	d__Viruses;p__norank;c__norank;o__norank;f__norank;g__Astrithrvirus;s__Astrithrvirus astrithr [dsDNA]	47.4	_	_	_	GO:0003674;GO:0003824;GO:0003887;GO:0006139;GO:0006259;GO:0006725;GO:0006807;GO:0008150;GO:0008152;GO:0009058;GO:0009059;GO:0009987;GO:0016032;GO:0016740;GO:0016772;GO:0016779;GO:0018130;GO:0019058;GO:0019079;GO:0019438;GO:0034061;GO:0034641;GO:0034645;GO:0034654;GO:0039687;GO:0039693;GO:0043170;GO:0044237;GO:0044238;GO:0044249;GO:0044260;GO:0044271;GO:0044403;GO:0044419;GO:0046483;GO:0051704;GO:…	_	_	_	_
B1Y__12263_9	369	hypothetical protein	d__Viruses;p__norank;c__norank;o__norank;f__norank;g__Astrithrvirus;s__Astrithrvirus astrithr [dsDNA]	55.1	sp|P07541|PKG16_BPPZA	DNA packaging protein OS=Bacillus phage PZA OX=10757 GN=16 PE=3 SV=1	26.2	GO:0003674;GO:0003676;GO:0003723;GO:0003824;GO:0005488;GO:0008150;GO:0016032;GO:0016462;GO:0016787;GO:0016817;GO:0016818;GO:0016887;GO:0017111;GO:0019058;GO:0019068;GO:0019072;GO:0019073;GO:0044403;GO:0044419;GO:0051704;GO:0097159;GO:1901363	_	_	_	_
B1Y__12285_1	542	major capsid protein	d__Viruses;p__norank;c__norank;o__norank;f__Microviridae;g__norank;s__Alces alces faeces associated microvirus MP10 5560 [ssDNA]	53.6	sp|Q9G059|CAPSD_BPPHM	Capsid protein VP1 OS=Bdellovibrio phage phiMH2K OX=145579 GN=ORF1 PE=3 SV=1	43.2	_	_	_	_	_
B1Y__12285_2	168	_	_	_	_	_	_	_	_	_	_	_
B1Y__12285_3	98	_	_	_	_	_	_	_	_	_	_	_
B1Y__12285_4	328	replication initiation protein	d__Viruses;p__norank;c__norank;o__norank;f__Microviridae;g__norank;s__Alces alces faeces associated microvirus MP10 5560 [ssDNA]	38.6	sp|P11334|REP_SPV4	Replication-associated protein ORF2 OS=Spiroplasma virus 4 OX=10855 GN=ORF2 PE=3 SV=1	39.7	_	_	_	_	_
B1Y__12303_1	126	major capsid protein	d__Viruses;p__norank;c__norank;o__norank;f__Steigviridae;g__Paundivirus;s__Paundivirus hollandii [dsDNA]	65.6	_	_	_	_	_	_	_	_
B1Y__12303_2	297	endonuclease	d__Viruses;p__norank;c__norank;o__norank;f__norank;g__norank;s__crAssphage cr115	46.3	_	_	_	_	_	_	_	_
B1Y__12303_3	202	major capsid protein	d__Viruses;p__norank;c__norank;o__norank;f__Steigviridae;g__Paundivirus;s__Paundivirus hollandii [dsDNA]	68.1	_	_	_	_	_	_	_	_
B1Y__12303_4	174	hypothetical protein	d__Viruses;p__norank;c__norank;o__norank;f__norank;g__norank;s__crAssphage cr128	55.4	_	_	_	_	_	_	_	_
B1Y__1230_1	29	_	_	_	_	_	_	_	_	_	_	_
B1Y__1230_2	301	replication protein VP4	d__Viruses;p__norank;c__norank;o__norank;f__Microviridae;g__norank;s__Gokushovirinae Bog1183	45.1	sp|P11334|REP_SPV4	Replication-associated protein ORF2 OS=Spiroplasma virus 4 OX=10855 GN=ORF2 PE=3 SV=1	32.3	_	_	_	_	_
B1Y__1230_3	96	_	_	_	_	_	_	_	_	_	_	_
B1Y__1230_4	71	_	_	_	_	_	_	_	_	_	_	_
B1Y__1230_5	148	internal scaffolding protein VP3	d__Viruses;p__norank;c__norank;o__norank;f__Microviridae;g__norank;s__Gokushovirinae Bog1183	40.8	_	_	_	_	_	_	_	_
B1Y__12311_1	22	_	_	_	_	_	_	_	_	_	_	_
B1Y__12311_10	126	_	_	_	_	_	_	_	_	_	_	_
B1Y__12311_11	95	hypothetical protein	d__Viruses;p__norank;c__norank;o__norank;f__norank;g__Maenadvirus;s__Maenadvirus P1 [dsDNA]	57	_	_	_	_	_	_	_	_
B1Y__12311_12	78	_	_	_	_	_	_	_	_	_	_	_
B1Y__12311_13	22	_	_	_	_	_	_	_	_	_	_	_
B1Y__12311_2	39	_	_	_	_	_	_	_	_	_	_	_
B1Y__12311_3	188	_	_	_	_	_	_	_	_	_	_	_
B1Y__12311_4	64	_	_	_	_	_	_	_	_	_	_	_
B1Y__12311_5	66	_	_	_	_	_	_	_	_	_	_	_
B1Y__12311_6	52	_	_	_	_	_	_	_	_	_	_	_
B1Y__12311_7	75	_	_	_	_	_	_	_	_	_	_	_
B1Y__12311_8	79	_	_	_	_	_	_	_	_	_	_	_
B1Y__12311_9	110	_	_	_	_	_	_	_	_	_	_	_
B1Y__12314_1	294	_	_	_	_	_	_	_	_	_	_	_
B1Y__12314_2	58	_	_	_	_	_	_	_	_	_	_	_
B1Y__12314_3	112	_	_	_	_	_	_	_	_	_	_	_
B1Y__12314_4	149	_	_	_	_	_	_	_	_	_	_	_
B1Y__12314_5	45	_	_	_	_	_	_	_	_	_	_	_
B1Y__12314_6	87	_	_	_	_	_	_	_	_	_	_	_
B1Y__12314_7	36	_	_	_	_	_	_	_	_	_	_	_
B1Y__12314_8	202	_	_	_	_	_	_	_	_	_	_	_
B1Y__12328_1	144	_	_	_	_	_	_	_	_	_	_	_
B1Y__12328_2	535	major capsid protein	d__Viruses;p__norank;c__norank;o__norank;f__Microviridae;g__norank;s__Alces alces faeces associated microvirus MP10 5560 [ssDNA]	50.8	sp|P11333|CAPSD_SPV4	Capsid protein VP1 OS=Spiroplasma virus 4 OX=10855 GN=ORF1 PE=1 SV=1	41.9	_	_	_	_	_
B1Y__12328_3	197	DNA pilot protein VP2	d__Viruses;p__norank;c__norank;o__norank;f__Microviridae;g__norank;s__Gokushovirinae Bog1183	65.7	_	_	_	_	_	_	_	_
B1Y__12328_4	82	_	_	_	_	_	_	_	_	_	_	_
B1Y__12328_5	86	_	_	_	_	_	_	_	_	_	_	_
B1Y__12358_1	436	major capsid protein	d__Viruses;p__norank;c__norank;o__norank;f__Microviridae;g__norank;s__Lynx canadensis associated microvirus CLP 9413 [ssDNA]	69.7	_	_	_	_	_	_	_	_
B1Y__12358_2	284	minor capsid protein	d__Viruses;p__norank;c__norank;o__norank;f__Microviridae;g__norank;s__Lynx canadensis associated microvirus CLP 9413 [ssDNA]	43	_	_	_	_	_	_	_	_
B1Y__12358_3	52	_	_	_	_	_	_	_	_	_	_	_
B1Y__12358_4	129	_	_	_	_	_	_	_	_	_	_	_
B1Y__12409_1	222	toprim domain-containing protein	d__Viruses;p__norank;c__norank;o__norank;f__norank;g__Lederbergvirus;s__Salmonella phage epsilon34 [dsDNA]	28.3	_	_	_	_	_	_	_	_
B1Y__12409_10	65	_	_	_	_	_	_	_	_	_	_	_
B1Y__12409_11	49	_	_	_	_	_	_	_	_	_	_	_
B1Y__12409_12	47	_	_	_	_	_	_	_	_	_	_	_
B1Y__12409_2	70	_	_	_	_	_	_	_	_	_	_	_
B1Y__12409_3	44	_	_	_	_	_	_	_	_	_	_	_
B1Y__12409_4	66	_	_	_	_	_	_	_	_	_	_	_
B1Y__12409_5	140	RusA family crossover junction endodeoxyribonuclease	d__Viruses;p__norank;c__norank;o__norank;f__Siphoviridae;g__norank;s__Lactobacillus phage LL-H [dsDNA]	48.1	sp|P45911|YQAN_BACSU	Uncharacterized protein YqaN OS=Bacillus subtilis (strain 168) OX=224308 GN=yqaN PE=4 SV=1	39.3	_	COG4570	L	K01160	rusA
B1Y__12409_6	53	_	_	_	_	_	_	_	_	_	_	_
B1Y__12409_7	55	_	_	_	_	_	_	_	_	_	_	_
B1Y__12409_8	78	hypothetical protein	d__Viruses;p__norank;c__norank;o__norank;f__norank;g__Phietavirus;s__Phietavirus B236 [dsDNA]	55.2	_	_	_	_	_	_	_	_
B1Y__12409_9	197	HNH endonuclease	d__Viruses;p__norank;c__norank;o__norank;f__Siphoviridae;g__norank;s__Streptococcus phage SMP [dsDNA]	39.2	_	_	_	_	_	_	_	_
B1Y__12421_1	53	_	_	_	_	_	_	_	_	_	_	_
B1Y__12421_2	84	_	_	_	_	_	_	_	_	_	_	_
B1Y__12421_3	96	_	_	_	_	_	_	_	_	_	_	_
B1Y__12421_4	68	_	_	_	_	_	_	_	_	_	_	_
B1Y__12421_5	77	_	_	_	_	_	_	_	_	_	_	_
B1Y__12421_6	74	_	_	_	_	_	_	_	_	_	_	_
B1Y__12421_7	103	IS200/IS605 family element transposase accessory protein TnpB	d__Viruses;p__norank;c__norank;o__norank;f__Siphoviridae;g__norank;s__Geobacillus virus E3 [dsDNA]	53.5	sp|P76102|INSQ_ECOLI	Putative transposase InsQ for insertion sequence element IS609 OS=Escherichia coli (strain K12) OX=83333 GN=insQ PE=3 SV=2	36.6	_	COG0675	L	K07496	K07496
B1Y__1243_1	162	putative RNA-polymerase subunit	d__Viruses;p__norank;c__norank;o__norank;f__norank;g__norank;s__crAssphage cr85	67.9	_	_	_	_	_	_	_	_
B1Y__1243_2	952	putative RNA-polymerase subunit	d__Viruses;p__norank;c__norank;o__norank;f__norank;g__norank;s__crAssphage cr85	75.7	_	_	_	_	_	_	_	_
B1Y__12446_1	205	_	_	_	_	_	_	_	_	_	_	_
B1Y__12446_2	539	capsid protein	d__Viruses;p__norank;c__norank;o__norank;f__Microviridae;g__Enterogokushovirus;s__Enterogokushovirus EC6098 [ssDNA]	55.3	sp|Q9G059|CAPSD_BPPHM	Capsid protein VP1 OS=Bdellovibrio phage phiMH2K OX=145579 GN=ORF1 PE=3 SV=1	49.7	_	_	_	_	_
B1Y__12446_3	31	_	_	_	_	_	_	_	_	_	_	_
B1Y__1244_1	304	_	_	_	_	_	_	_	_	_	_	_
B1Y__1244_2	68	_	_	_	_	_	_	_	_	_	_	_
B1Y__1244_3	673	_	_	_	_	_	_	_	_	_	_	_
B1Y__1244_4	491	_	_	_	_	_	_	_	_	_	_	_
B1Y__1244_5	69	_	_	_	_	_	_	_	_	_	_	_
B1Y__1244_6	74	_	_	_	_	_	_	_	_	_	_	_
B1Y__1244_7	81	_	_	_	_	_	_	_	_	_	_	_
B1Y__1244_8	179	replication protein VP4	d__Viruses;p__norank;c__norank;o__norank;f__Microviridae;g__norank;s__Microviridae Bog5275	36.4	_	_	_	_	_	_	_	_
B1Y__12468_1	79	_	_	_	_	_	_	_	_	_	_	_
B1Y__12468_2	57	_	_	_	_	_	_	_	_	_	_	_
B1Y__12468_3	64	_	_	_	_	_	_	_	_	_	_	_
B1Y__12468_4	71	_	_	_	_	_	_	_	_	_	_	_
B1Y__12473_1	373	_	_	_	_	_	_	_	_	_	_	_
B1Y__12473_2	82	_	_	_	_	_	_	_	_	_	_	_
B1Y__12473_3	100	_	_	_	_	_	_	_	_	_	_	_
B1Y__12473_4	60	_	_	_	_	_	_	_	_	_	_	_
B1Y__12473_5	94	_	_	_	_	_	_	_	_	_	_	_
B1Y__12473_6	57	_	_	_	_	_	_	_	_	_	_	_
B1Y__12473_7	166	_	_	_	_	_	_	_	_	_	_	_
B1Y__12509_1	480	_	_	_	_	_	_	_	_	_	_	_
B1Y__12509_2	50	_	_	_	_	_	_	_	_	_	_	_
B1Y__12509_3	200	ERF family protein	d__Viruses;p__norank;c__norank;o__norank;f__norank;g__Lubbockvirus;s__Clostridium virus phiCD27 [dsDNA]	58.7	sp|P04892|ERF_BPP22	Essential recombination function protein OS=Salmonella phage P22 OX=10754 GN=erf PE=4 SV=2	62.6	_	_	_	_	_
B1Y__12509_4	68	_	_	_	_	_	_	_	_	_	_	_
B1Y__12509_5	62	_	_	_	_	_	_	_	_	_	_	_
B1Y__12509_6	95	_	_	_	_	_	_	_	_	_	_	_
B1Y__12509_7	93	_	_	_	_	_	_	_	_	_	_	_
B1Y__12509_8	52	_	_	_	_	_	_	_	_	_	_	_
B1Y__12521_1	39	_	_	_	_	_	_	_	_	_	_	_
B1Y__12521_10	232	_	_	_	_	_	_	_	_	_	_	_
B1Y__12521_11	70	_	_	_	_	_	_	_	_	_	_	_
B1Y__12521_2	63	_	_	_	_	_	_	_	_	_	_	_
B1Y__12521_3	87	_	_	_	_	_	_	_	_	_	_	_
B1Y__12521_4	282	_	_	_	_	_	_	_	_	_	_	_
B1Y__12521_5	55	_	_	_	_	_	_	_	_	_	_	_
B1Y__12521_6	117	_	_	_	_	_	_	_	_	_	_	_
B1Y__12521_7	529	_	_	_	_	_	_	_	_	_	_	_
B1Y__12521_8	166	_	_	_	_	_	_	_	_	_	_	_
B1Y__12521_9	50	_	_	_	_	_	_	_	_	_	_	_
B1Y__12546_1	55	_	_	_	_	_	_	_	_	_	_	_
B1Y__12546_2	50	_	_	_	_	_	_	_	_	_	_	_
B1Y__12546_3	126	_	_	_	_	_	_	_	_	_	_	_
B1Y__12546_4	225	_	_	_	_	_	_	_	_	_	_	_
B1Y__12546_5	53	_	_	_	_	_	_	_	_	_	_	_
B1Y__12556_1	101	_	_	_	_	_	_	_	_	_	_	_
B1Y__12556_2	272	_	_	_	_	_	_	_	_	_	_	_
B1Y__12556_3	106	_	_	_	_	_	_	_	_	_	_	_
B1Y__12556_4	245	spike protein/glycoprotein	d__Viruses;p__norank;c__norank;o__norank;f__norank;g__norank;s__crAssphage cr52	27.4	_	_	_	_	_	_	_	_
B1Y__12564_1	38	_	_	_	_	_	_	_	_	_	_	_
B1Y__12564_2	262	_	_	_	_	_	_	_	_	_	_	_
B1Y__12564_3	554	major capsid protein	d__Viruses;p__norank;c__norank;o__norank;f__Microviridae;g__norank;s__Alces alces faeces associated microvirus MP11 5517 [ssDNA]	73.8	sp|Q9G059|CAPSD_BPPHM	Capsid protein VP1 OS=Bdellovibrio phage phiMH2K OX=145579 GN=ORF1 PE=3 SV=1	43.9	_	_	_	_	_
B1Y__12564_4	137	minor capsid protein	d__Viruses;p__norank;c__norank;o__norank;f__Microviridae;g__norank;s__Alces alces faeces associated microvirus MP11 5517 [ssDNA]	69.5	_	_	_	_	_	_	_	_
B1Y__12564_5	71	_	_	_	_	_	_	_	_	_	_	_
B1Y__12564_6	145	nonstructural protein	d__Viruses;p__norank;c__norank;o__norank;f__Microviridae;g__norank;s__Alces alces faeces associated microvirus MP11 5517 [ssDNA]	60	_	_	_	_	_	_	_	_
B1Y__12564_7	362	replication initiation protein	d__Viruses;p__norank;c__norank;o__norank;f__Microviridae;g__norank;s__Alces alces faeces associated microvirus MP11 5517 [ssDNA]	85	sp|P11334|REP_SPV4	Replication-associated protein ORF2 OS=Spiroplasma virus 4 OX=10855 GN=ORF2 PE=3 SV=1	29.9	_	_	_	_	_
B1Y__12564_8	38	_	_	_	_	_	_	_	_	_	_	_
B1Y__12564_9	249	_	_	_	_	_	_	_	_	_	_	_
B1Y__12601_1	311	major capsid protein	d__Viruses;p__norank;c__norank;o__norank;f__norank;g__Oengusvirus;s__Oengusvirus oengus [dsDNA]	40.6	_	_	_	_	_	_	K06904	K06904
B1Y__12601_2	417	portal protein	d__Viruses;p__norank;c__norank;o__norank;f__norank;g__Kenoshavirus;s__Kenoshavirus crocheter [dsDNA]	61.1	_	_	_	_	_	_	_	_
B1Y__12601_3	56	terminase large subunit	d__Viruses;p__norank;c__norank;o__norank;f__norank;g__Scapunavirus;s__Scapunavirus scap1 [dsDNA]	81.8	_	_	_	_	_	_	_	_
B1Y__12614_1	82	_	_	_	_	_	_	_	_	_	_	_
B1Y__12614_2	92	_	_	_	_	_	_	_	_	_	_	_
B1Y__12614_3	65	_	_	_	_	_	_	_	_	_	_	_
B1Y__12614_4	55	_	_	_	_	_	_	_	_	_	_	_
B1Y__12614_5	91	_	_	_	_	_	_	_	_	_	_	_
B1Y__12614_6	31	_	_	_	_	_	_	_	_	_	_	_
B1Y__12614_7	104	_	_	_	_	_	_	_	_	_	_	_
B1Y__12614_8	79	_	_	_	_	_	_	_	_	_	_	_
B1Y__12624_1	308	DNA polymerase	d__Viruses;p__norank;c__norank;o__norank;f__Rountreeviridae;g__Rosenblumvirus;s__Rosenblumvirus GRCS [dsDNA]	54.5	_	_	_	GO:0003674;GO:0003824;GO:0003887;GO:0006139;GO:0006259;GO:0006725;GO:0006807;GO:0008150;GO:0008152;GO:0009058;GO:0009059;GO:0009987;GO:0016032;GO:0016740;GO:0016772;GO:0016779;GO:0018130;GO:0019058;GO:0019079;GO:0019438;GO:0034061;GO:0034641;GO:0034645;GO:0034654;GO:0039687;GO:0039693;GO:0043170;GO:0044237;GO:0044238;GO:0044249;GO:0044260;GO:0044271;GO:0044403;GO:0044419;GO:0046483;GO:0051704;GO:…	_	_	_	_
B1Y__12624_2	82	_	_	_	_	_	_	_	_	_	_	_
B1Y__12624_3	58	_	_	_	_	_	_	_	_	_	_	_
B1Y__12624_4	389	capsid protein	d__Viruses;p__norank;c__norank;o__norank;f__Rountreeviridae;g__Andhravirus;s__Andhravirus St134 [dsDNA]	65.9	sp|G9M952|CAPSD_BPPS4	Major capsid protein OS=Staphylococcus phage S24-1 OX=1010614 GN=ORF19 PE=1 SV=1	63.8	_	_	_	_	_
B1Y__12624_5	325	upper collar protein	d__Viruses;p__norank;c__norank;o__norank;f__Rountreeviridae;g__Andhravirus;s__Andhravirus St134 [dsDNA]	47.6	sp|Q859K6|PORTL_BP44A	Portal protein OS=Staphylococcus phage 44AHJD OX=204086 PE=3 SV=1	46	GO:0005575;GO:0008150;GO:0016032;GO:0019012;GO:0019028;GO:0019058;GO:0019068;GO:0019072;GO:0019073;GO:0032991;GO:0044403;GO:0044419;GO:0044423;GO:0046729;GO:0046798;GO:0051704	_	_	_	_
B1Y__12665_1	857	hypothetical protein	d__Viruses;p__norank;c__norank;o__norank;f__Siphoviridae;g__norank;s__Croceibacter phage P2559Y [dsDNA]	40.6	_	_	_	_	_	_	_	_
B1Y__12665_2	290	hypothetical protein	d__Viruses;p__norank;c__norank;o__norank;f__Siphoviridae;g__norank;s__Croceibacter phage P2559Y [dsDNA]	41.1	_	_	_	_	_	_	_	_
B1Y__12665_3	651	hypothetical protein	d__Viruses;p__norank;c__norank;o__norank;f__Siphoviridae;g__norank;s__Croceibacter phage P2559S [dsDNA]	34.8	_	_	_	_	_	_	_	_
B1Y__12680_1	90	HNH endonuclease	d__Viruses;p__norank;c__norank;o__norank;f__norank;g__norank;s__crAssphage cr6	47	_	_	_	_	_	_	_	_
B1Y__12680_2	648	_	_	_	_	_	_	_	_	_	_	_
B1Y__12680_3	260	_	_	_	_	_	_	_	_	_	_	_
B1Y__12680_4	205	putative structural protein	d__Viruses;p__norank;c__norank;o__norank;f__Siphoviridae;g__norank;s__Brevibacillus phage Sundance [dsDNA]	30.8	_	_	_	_	_	_	_	_
B1Y__12779_1	187	_	_	_	_	_	_	_	_	_	_	_
B1Y__12779_2	92	_	_	_	_	_	_	_	_	_	_	_
B1Y__12779_3	112	_	_	_	_	_	_	_	_	_	_	_
B1Y__12779_4	47	_	_	_	_	_	_	_	_	_	_	_
B1Y__12779_5	192	_	_	_	_	_	_	_	_	_	_	_
B1Y__12786_1	42	_	_	_	_	_	_	_	_	_	_	_
B1Y__12786_2	193	_	_	_	_	_	_	_	_	_	_	_
B1Y__12786_3	334	hypothetical protein	d__Viruses;p__norank;c__norank;o__norank;f__Siphoviridae;g__norank;s__Clostridium phage c-st [dsDNA]	24.9	_	_	_	_	_	_	_	_
B1Y__12786_4	94	_	_	_	_	_	_	_	_	_	_	_
B1Y__12797_1	251	_	_	_	_	_	_	_	_	_	_	_
B1Y__12797_2	173	scaffolding protein	d__Viruses;p__norank;c__norank;o__norank;f__norank;g__Janusvirus;s__Janusvirus janus [dsDNA]	50	_	_	_	_	_	_	_	_
B1Y__12797_3	250	capsid maturation protease	d__Viruses;p__norank;c__norank;o__norank;f__norank;g__Thetabobvirus;s__Mycobacterium virus ThetaBob [dsDNA]	33.6	_	_	_	_	_	_	_	_
B1Y__12797_4	304	portal protein	d__Viruses;p__norank;c__norank;o__norank;f__norank;g__Emalynvirus;s__Emalynvirus emalyn [dsDNA]	40.6	sp|O64207|PORTL_BPMD2	Portal protein OS=Mycobacterium phage D29 OX=28369 GN=14 PE=3 SV=1	37.1	_	_	_	_	_
B1Y__12800_1	117	DNA polymerase	d__Viruses;p__norank;c__norank;o__norank;f__norank;g__Lidleunavirus;s__Lidleunavirus Ldl1 [dsDNA]	42.9	sp|O31902|YORL_BACSU	Probable DNA polymerase YorL OS=Bacillus subtilis (strain 168) OX=224308 GN=yorL PE=3 SV=1	42.2	_	_	_	_	_
B1Y__12800_2	117	single-stranded DNA-binding protein	d__Viruses;p__norank;c__norank;o__norank;f__Siphoviridae;g__norank;s__Staphylococcus phage SPbeta-like [dsDNA]	33	_	_	_	_	_	_	_	_
B1Y__12800_3	240	homing endonuclease	d__Viruses;p__norank;c__norank;o__norank;f__Herelleviridae;g__Schiekvirus;s__Schiekvirus EFDG1 [dsDNA]	46.3	_	_	_	_	_	_	_	_
B1Y__12800_4	226	putative single stranded DNA exonuclease	d__Viruses;p__norank;c__norank;o__norank;f__Siphoviridae;g__norank;s__Geobacillus virus E3 [dsDNA]	42.2	sp|O64145|YORK_BPSPB	Putative single-strand DNA-specific exonuclease yorK OS=Bacillus phage SPbeta OX=66797 GN=yorK PE=3 SV=1	32.6	_	COG0608	L	K07462	recJ
B1Y__12801_1	51	_	_	_	_	_	_	_	_	_	_	_
B1Y__12801_2	309	replication protein VP4	d__Viruses;p__norank;c__norank;o__norank;f__Microviridae;g__norank;s__Gokushovirinae Bog1183	43.2	_	_	_	_	_	_	_	_
B1Y__12801_3	42	_	_	_	_	_	_	_	_	_	_	_
B1Y__12801_4	267	_	_	_	_	_	_	_	_	_	_	_
B1Y__12801_5	529	structural protein	d__Viruses;p__norank;c__norank;o__norank;f__Microviridae;g__Chlamydiamicrovirus;s__Chlamydiamicrovirus Chp2 [ssDNA]	57.6	sp|Q9G059|CAPSD_BPPHM	Capsid protein VP1 OS=Bdellovibrio phage phiMH2K OX=145579 GN=ORF1 PE=3 SV=1	50.8	_	_	_	_	_
B1Y__12801_6	46	_	_	_	_	_	_	_	_	_	_	_
B1Y__12814_1	506	_	_	_	_	_	_	_	_	_	_	_
B1Y__12814_2	514	_	_	_	_	_	_	_	_	_	_	_
B1Y__12839_1	389	_	_	_	_	_	_	_	_	_	_	_
B1Y__12839_2	448	_	_	_	_	_	_	_	_	_	_	_
B1Y__12839_3	91	_	_	_	_	_	_	_	_	_	_	_
B1Y__12845_1	121	terminase large subunit	d__Viruses;p__norank;c__norank;o__norank;f__Herelleviridae;g__Pecentumvirus;s__Pecentumvirus LMSP25 [dsDNA]	55.8	_	_	_	GO:0005575;GO:0008150;GO:0016032;GO:0018995;GO:0019058;GO:0019068;GO:0019072;GO:0019073;GO:0030430;GO:0032991;GO:0033643;GO:0033646;GO:0043493;GO:0043656;GO:0043657;GO:0044215;GO:0044216;GO:0044217;GO:0044403;GO:0044419;GO:0051704;GO:0098009;GO:1902494;GO:1904949	_	_	_	_
B1Y__12845_2	143	hypothetical protein	d__Viruses;p__norank;c__norank;o__norank;f__Herelleviridae;g__Schiekvirus;s__Schiekvirus EFDG1 [dsDNA]	37.1	_	_	_	_	_	_	_	_
B1Y__12845_3	95	hypothetical protein	d__Viruses;p__norank;c__norank;o__norank;f__Herelleviridae;g__Pecentumvirus;s__Pecentumvirus list36 [dsDNA]	56	_	_	_	_	_	_	_	_
B1Y__12845_4	126	_	_	_	_	_	_	_	_	_	_	_
B1Y__12845_5	119	hypothetical protein	d__Viruses;p__norank;c__norank;o__norank;f__Herelleviridae;g__Pecentumvirus;s__Pecentumvirus list36 [dsDNA]	44.6	_	_	_	_	_	_	_	_
B1Y__12845_6	128	hypothetical protein	d__Viruses;p__norank;c__norank;o__norank;f__Herelleviridae;g__Agatevirus;s__Agatevirus bobb [dsDNA]	38.8	_	_	_	_	_	_	_	_
B1Y__12845_7	89	_	_	_	_	_	_	_	_	_	_	_
B1Y__1287_1	678	_	_	_	_	_	_	_	_	_	_	_
B1Y__12885_1	521	putative type III restriction protein res subunit	d__Viruses;p__norank;c__norank;o__norank;f__norank;g__Becedseptimavirus;s__Becedseptimavirus BCD7 [dsDNA]	38.6	_	_	_	_	_	_	_	_
B1Y__12885_10	162	_	_	_	_	_	_	_	_	_	_	_
B1Y__12885_2	162	_	_	_	_	_	_	_	_	_	_	_
B1Y__12885_3	106	_	_	_	_	_	_	_	_	_	_	_
B1Y__12885_4	86	_	_	_	_	_	_	_	_	_	_	_
B1Y__12885_5	107	_	_	_	_	_	_	_	_	_	_	_
B1Y__12885_6	82	_	_	_	_	_	_	_	_	_	_	_
B1Y__12885_7	100	_	_	_	_	_	_	_	_	_	_	_
B1Y__12885_8	109	_	_	_	_	_	_	_	_	_	_	_
B1Y__12885_9	109	_	_	_	_	_	_	_	_	_	_	_
B1Y__12902_1	160	major tail protein	d__Viruses;p__norank;c__norank;o__norank;f__norank;g__Bingvirus;s__Bingvirus bing [dsDNA]	62.8	_	_	_	_	_	_	_	_
B1Y__12902_2	121	hypothetical protein	d__Viruses;p__norank;c__norank;o__norank;f__norank;g__Oengusvirus;s__Oengusvirus oengus [dsDNA]	48.3	_	_	_	_	_	_	_	_
B1Y__12902_3	180	hypothetical protein	d__Viruses;p__norank;c__norank;o__norank;f__norank;g__Rimavirus;s__Rimavirus rima [dsDNA]	55.8	_	_	_	_	_	_	_	_
B1Y__12902_4	104	_	_	_	_	_	_	_	_	_	_	_
B1Y__12902_5	127	hypothetical protein	d__Viruses;p__norank;c__norank;o__norank;f__norank;g__Mudcatvirus;s__Mudcatvirus circum [dsDNA]	57.1	_	_	_	_	_	_	_	_
B1Y__12902_6	259	tape measure protein	d__Viruses;p__norank;c__norank;o__norank;f__norank;g__Oengusvirus;s__Oengusvirus oengus [dsDNA]	60.2	_	_	_	_	COG5412	S	_	_
B1Y__12908_1	31	_	_	_	_	_	_	_	_	_	_	_
B1Y__12908_2	163	_	_	_	_	_	_	_	_	_	_	_
B1Y__12908_3	423	_	_	_	_	_	_	_	_	_	_	_
B1Y__12908_4	154	_	_	_	_	_	_	_	_	_	_	_
B1Y__12921_1	92	_	_	_	_	_	_	_	_	_	_	_
B1Y__12921_2	34	_	_	_	_	_	_	_	_	_	_	_
B1Y__12921_3	37	_	_	_	_	_	_	_	_	_	_	_
B1Y__12921_4	50	_	_	_	_	_	_	_	_	_	_	_
B1Y__12921_5	50	_	_	_	_	_	_	_	_	_	_	_
B1Y__12932_1	512	major capsid protein VP1	d__Viruses;p__norank;c__norank;o__norank;f__Microviridae;g__norank;s__Microviridae Fen7786	28.5	_	_	_	_	_	_	_	_
B1Y__12932_2	145	_	_	_	_	_	_	_	_	_	_	_
B1Y__12932_3	197	_	_	_	_	_	_	_	_	_	_	_
B1Y__12980_1	163	_	_	_	_	_	_	_	_	_	_	_
B1Y__12980_2	228	_	_	_	sp|P03858|REPY_STAAU	Replication protein OS=Staphylococcus aureus OX=1280 GN=repF PE=3 SV=2	33.3	_	_	_	_	_
B1Y__12980_3	97	_	_	_	_	_	_	_	_	_	_	_
B1Y__12980_4	77	_	_	_	_	_	_	_	_	_	_	_
B1Y__12980_5	316	_	_	_	_	_	_	_	_	_	_	_
B1Y__12981_1	334	_	_	_	_	_	_	_	_	_	_	_
B1Y__12981_2	257	_	_	_	_	_	_	_	_	_	_	_
B1Y__12981_3	346	DnaX DNA polymerase III clamp loader complex gamma-tau-delta subunit	d__Viruses;p__norank;c__norank;o__norank;f__Siphoviridae;g__norank;s__Streptococcus phage Dp-1 [dsDNA]	39.5	sp|P09122|DPO3X_BACSU	DNA polymerase III subunit gamma/tau OS=Bacillus subtilis (strain 168) OX=224308 GN=dnaX PE=3 SV=3	39	GO:0008150;GO:0016032;GO:0019058;GO:0019079;GO:0039686;GO:0039693;GO:0044403;GO:0044419;GO:0051704	_	_	K02343	dnaX
B1Y__12981_4	175	_	_	_	_	_	_	_	_	_	_	_
B1Y__12981_5	391	RecA	d__Viruses;p__norank;c__norank;o__norank;f__Siphoviridae;g__norank;s__Streptococcus phage Dp-1 [dsDNA]	39	sp|C0R4E1|RECA_WOLWR	Protein RecA OS=Wolbachia sp. subsp. Drosophila simulans (strain wRi) OX=66084 GN=recA PE=3 SV=1	29.6	_	_	_	_	_
B1Y__12981_6	166	_	_	_	_	_	_	_	_	_	_	_
B1Y__12999_1	409	major CP	d__Viruses;p__norank;c__norank;o__norank;f__Microviridae;g__norank;s__Chimpanzee faeces associated microphage 2 [ssDNA]	49.9	sp|P11333|CAPSD_SPV4	Capsid protein VP1 OS=Spiroplasma virus 4 OX=10855 GN=ORF1 PE=1 SV=1	40.8	_	_	_	_	_
B1Y__12999_2	202	minor CP 2	d__Viruses;p__norank;c__norank;o__norank;f__Microviridae;g__norank;s__Chimpanzee faeces associated microphage 3 [ssDNA]	74.2	_	_	_	_	_	_	_	_
B1Y__129_1	24	_	_	_	_	_	_	_	_	_	_	_
B1Y__129_10	71	_	_	_	_	_	_	_	_	_	_	_
B1Y__129_11	67	_	_	_	_	_	_	_	_	_	_	_
B1Y__129_2	82	_	_	_	_	_	_	_	_	_	_	_
B1Y__129_3	60	_	_	_	_	_	_	_	_	_	_	_
B1Y__129_4	47	_	_	_	_	_	_	_	_	_	_	_
B1Y__129_5	68	_	_	_	_	_	_	_	_	_	_	_
B1Y__129_6	121	_	_	_	_	_	_	_	_	_	_	_
B1Y__129_7	53	_	_	_	_	_	_	_	_	_	_	_
B1Y__129_8	42	_	_	_	_	_	_	_	_	_	_	_
B1Y__129_9	173	_	_	_	_	_	_	_	_	_	K01449	cwlJ, sleB
B1Y__13026_1	40	_	_	_	_	_	_	_	_	_	_	_
B1Y__13026_2	146	internal scaffolding protein VP3	d__Viruses;p__norank;c__norank;o__norank;f__Microviridae;g__norank;s__Gokushovirinae Bog8989	31	_	_	_	_	_	_	_	_
B1Y__13026_3	88	_	_	_	_	_	_	_	_	_	_	_
B1Y__13026_4	324	replication protein VP4	d__Viruses;p__norank;c__norank;o__norank;f__Microviridae;g__norank;s__Gokushovirinae Bog1183	47	_	_	_	_	_	_	_	_
B1Y__13026_5	39	_	_	_	_	_	_	_	_	_	_	_
B1Y__13026_6	249	minor CP 2	d__Viruses;p__norank;c__norank;o__norank;f__Microviridae;g__norank;s__Chimpanzee faeces associated microphage 3 [ssDNA]	44.3	_	_	_	_	_	_	_	_
B1Y__13026_7	544	major CP	d__Viruses;p__norank;c__norank;o__norank;f__Microviridae;g__norank;s__Chimpanzee faeces associated microphage 1 [ssDNA]	50.5	sp|Q9G059|CAPSD_BPPHM	Capsid protein VP1 OS=Bdellovibrio phage phiMH2K OX=145579 GN=ORF1 PE=3 SV=1	43.1	_	_	_	_	_
B1Y__13026_8	52	_	_	_	_	_	_	_	_	_	_	_
B1Y__13034_1	53	_	_	_	_	_	_	_	_	_	_	_
B1Y__13034_2	594	major CP	d__Viruses;p__norank;c__norank;o__norank;f__Microviridae;g__norank;s__Chimpanzee faeces associated microphage 2 [ssDNA]	41.3	sp|P11333|CAPSD_SPV4	Capsid protein VP1 OS=Spiroplasma virus 4 OX=10855 GN=ORF1 PE=1 SV=1	37	_	_	_	_	_
B1Y__13034_3	32	_	_	_	_	_	_	_	_	_	_	_
B1Y__13050_1	54	_	_	_	_	_	_	_	_	_	_	_
B1Y__13050_2	297	_	_	_	_	_	_	_	_	_	_	_
B1Y__13050_3	133	_	_	_	_	_	_	_	_	_	_	_
B1Y__13050_4	578	major capsid protein VP1	d__Viruses;p__norank;c__norank;o__norank;f__Microviridae;g__norank;s__Parabacteroides phage YZ-2015a [ssDNA]	34.3	_	_	_	_	_	_	_	_
B1Y__13050_5	106	_	_	_	_	_	_	_	_	_	_	_
B1Y__13050_6	288	replication protein VP4	d__Viruses;p__norank;c__norank;o__norank;f__Microviridae;g__norank;s__Parabacteroides phage YZ-2015a [ssDNA]	33.2	sp|Q9G050|REP_BPPHM	Replication-associated protein VP4 OS=Bdellovibrio phage phiMH2K OX=145579 GN=ORF4 PE=3 SV=1	26.1	_	_	_	_	_
B1Y__13050_7	53	_	_	_	_	_	_	_	_	_	_	_
B1Y__13078_1	214	DNA pilot protein VP2	d__Viruses;p__norank;c__norank;o__norank;f__Microviridae;g__norank;s__Gokushovirinae Bog8989	58.3	_	_	_	_	_	_	_	_
B1Y__13078_2	578	major capsid protein	d__Viruses;p__norank;c__norank;o__norank;f__Microviridae;g__norank;s__Lynx canadensis associated microvirus CLP 9413 [ssDNA]	47.9	_	_	_	_	_	_	_	_
B1Y__13078_3	149	_	_	_	_	_	_	_	_	_	_	_
B1Y__13078_4	81	_	_	_	_	_	_	_	_	_	_	_
B1Y__13078_5	235	tail-type lysozyme domain-containing protein	d__Viruses;p__norank;c__norank;o__norank;f__norank;g__Lagaffevirus;s__Lagaffevirus lagaffe [dsDNA]	39	_	_	_	_	COG0860|COG3023	MV	K01447	xlyAB
B1Y__13078_6	41	_	_	_	_	_	_	_	_	_	_	_
B1Y__13078_7	184	replication initiation protein	d__Viruses;p__norank;c__norank;o__norank;f__Microviridae;g__norank;s__Lynx canadensis associated microvirus CLP 9413 [ssDNA]	26.9	_	_	_	_	_	_	_	_
B1Y__13104_1	78	_	_	_	_	_	_	_	_	_	_	_
B1Y__13104_2	361	_	_	_	_	_	_	_	_	_	_	_
B1Y__13104_3	136	_	_	_	_	_	_	_	_	_	_	_
B1Y__13104_4	115	_	_	_	_	_	_	_	_	_	_	_
B1Y__13105_1	277	_	_	_	_	_	_	_	_	_	_	_
B1Y__13105_10	103	_	_	_	_	_	_	_	_	_	_	_
B1Y__13105_11	67	_	_	_	_	_	_	_	_	_	_	_
B1Y__13105_2	110	_	_	_	_	_	_	_	_	_	_	_
B1Y__13105_3	103	_	_	_	_	_	_	_	_	_	_	_
B1Y__13105_4	63	_	_	_	_	_	_	_	_	_	_	_
B1Y__13105_5	100	_	_	_	_	_	_	_	_	_	_	_
B1Y__13105_6	195	_	_	_	sp|P20045|REPB_LACPN	Replication protein RepB OS=Lactobacillus plantarum OX=1590 GN=repB PE=3 SV=1	32.7	_	_	_	_	_
B1Y__13105_7	57	_	_	_	_	_	_	_	_	_	_	_
B1Y__13105_8	81	_	_	_	_	_	_	_	_	_	_	_
B1Y__13105_9	249	_	_	_	_	_	_	_	_	_	_	_
B1Y__13113_1	858	hypothetical protein	d__Viruses;p__norank;c__norank;o__norank;f__norank;g__norank;s__crAssphage cr271	47.9	_	_	_	_	_	_	_	_
B1Y__13125_1	86	_	_	_	_	_	_	_	_	_	_	_
B1Y__13125_2	554	major capsid protein VP1	d__Viruses;p__norank;c__norank;o__norank;f__Microviridae;g__norank;s__Microviridae Fen7918	35.2	sp|P11333|CAPSD_SPV4	Capsid protein VP1 OS=Spiroplasma virus 4 OX=10855 GN=ORF1 PE=1 SV=1	30.5	_	_	_	_	_
B1Y__13125_3	88	_	_	_	_	_	_	_	_	_	_	_
B1Y__13125_4	46	_	_	_	_	_	_	_	_	_	_	_
B1Y__13133_1	83	_	_	_	_	_	_	_	_	_	_	_
B1Y__13133_2	107	_	_	_	_	_	_	_	_	_	_	_
B1Y__13133_3	130	_	_	_	_	_	_	_	_	_	_	_
B1Y__13133_4	97	_	_	_	_	_	_	_	_	_	_	_
B1Y__13136_1	64	_	_	_	_	_	_	_	_	_	_	_
B1Y__13136_2	68	_	_	_	_	_	_	_	_	_	_	_
B1Y__13136_3	146	_	_	_	_	_	_	_	_	_	_	_
B1Y__13136_4	184	_	_	_	_	_	_	_	_	_	_	_
B1Y__13136_5	352	_	_	_	_	_	_	_	_	_	_	_
B1Y__13136_6	233	_	_	_	_	_	_	_	_	_	_	_
B1Y__13136_7	143	_	_	_	_	_	_	_	_	_	_	_
B1Y__13136_8	418	_	_	_	_	_	_	_	_	_	_	_
B1Y__13136_9	46	_	_	_	_	_	_	_	_	_	_	_
B1Y__13140_1	440	_	_	_	_	_	_	_	_	_	_	_
B1Y__13140_2	279	_	_	_	sp|O52776|REP_STRP2	Protein rep OS=Streptococcus pneumoniae serotype 2 (strain D39 / NCTC 7466) OX=373153 GN=rep PE=3 SV=1	52.1	_	_	_	_	_
B1Y__13165_1	65	_	_	_	_	_	_	_	_	_	_	_
B1Y__13165_2	317	_	_	_	_	_	_	_	_	_	_	_
B1Y__13165_3	92	_	_	_	_	_	_	_	_	_	_	_
B1Y__13165_4	57	_	_	_	_	_	_	_	_	_	_	_
B1Y__13165_5	58	_	_	_	_	_	_	_	_	_	_	_
B1Y__13183_1	99	_	_	_	_	_	_	_	_	_	_	_
B1Y__13183_2	113	gp010	d__Viruses;p__norank;c__norank;o__norank;f__norank;g__Pepyhexavirus;s__Pepyhexavirus poco6 [dsDNA]	61.6	_	_	_	_	_	_	_	_
B1Y__13183_3	317	_	_	_	_	_	_	_	_	_	_	_
B1Y__13183_4	150	_	_	_	_	_	_	_	_	_	_	_
B1Y__13183_5	84	_	_	_	_	_	_	_	_	_	_	_
B1Y__13183_6	156	_	_	_	_	_	_	_	_	_	_	_
B1Y__13218_1	168	_	_	_	_	_	_	_	_	_	_	_
B1Y__13218_2	59	_	_	_	_	_	_	_	_	_	_	_
B1Y__13218_3	46	_	_	_	_	_	_	_	_	_	K09005	K09005
B1Y__13218_4	33	_	_	_	_	_	_	_	_	_	_	_
B1Y__13218_5	51	_	_	_	_	_	_	_	_	_	_	_
B1Y__13218_6	88	_	_	_	_	_	_	_	_	_	_	_
B1Y__13224_1	206	_	_	_	_	_	_	_	_	_	_	_
B1Y__13224_2	118	_	_	_	_	_	_	_	_	_	_	_
B1Y__13224_3	76	_	_	_	_	_	_	_	_	_	_	_
B1Y__13224_4	211	_	_	_	_	_	_	_	_	_	_	_
B1Y__13224_5	55	_	_	_	_	_	_	_	_	_	_	_
B1Y__13224_6	84	_	_	_	_	_	_	_	_	_	_	_
B1Y__13224_7	274	_	_	_	_	_	_	_	_	_	_	_
B1Y__13224_8	33	_	_	_	_	_	_	_	_	_	_	_
B1Y__13243_1	167	_	_	_	_	_	_	_	_	_	_	_
B1Y__13243_2	411	hypothetical protein	d__Viruses;p__norank;c__norank;o__norank;f__norank;g__norank;s__crAssphage cr108	38	_	_	_	_	_	_	_	_
B1Y__13243_3	453	_	_	_	_	_	_	_	_	_	_	_
B1Y__13243_4	113	putative COOH-NH2 ligase	d__Viruses;p__norank;c__norank;o__norank;f__norank;g__norank;s__crAssphage cr108	48.6	_	_	_	_	_	_	_	_
B1Y__13266_1	93	_	_	_	_	_	_	_	_	_	_	_
B1Y__13266_2	93	_	_	_	_	_	_	_	_	_	_	_
B1Y__13266_3	200	_	_	_	_	_	_	_	_	_	_	_
B1Y__13266_4	55	_	_	_	_	_	_	_	_	_	_	_
B1Y__13266_5	39	_	_	_	_	_	_	_	_	_	_	_
B1Y__13266_6	71	_	_	_	_	_	_	_	_	_	_	_
B1Y__13266_7	62	_	_	_	_	_	_	_	_	_	_	_
B1Y__13266_8	256	_	_	_	_	_	_	_	_	_	_	_
B1Y__13266_9	376	_	_	_	_	_	_	_	_	_	_	_
B1Y__1326_1	104	_	_	_	_	_	_	_	_	_	_	_
B1Y__1326_2	65	_	_	_	_	_	_	_	_	_	_	_
B1Y__1326_3	50	_	_	_	_	_	_	_	_	_	_	_
B1Y__1326_4	69	_	_	_	_	_	_	_	_	_	_	_
B1Y__1326_5	214	_	_	_	_	_	_	_	_	_	_	_
B1Y__1326_6	107	_	_	_	_	_	_	_	_	_	_	_
B1Y__1326_7	260	gp069	d__Viruses;p__norank;c__norank;o__norank;f__norank;g__Pepyhexavirus;s__Pepyhexavirus pepy6 [dsDNA]	26	_	_	_	_	_	_	_	_
B1Y__1326_8	134	_	_	_	_	_	_	_	_	_	_	_
B1Y__1326_9	46	_	_	_	_	_	_	_	_	_	_	_
B1Y__13285_1	172	_	_	_	_	_	_	_	_	_	_	_
B1Y__13285_2	143	_	_	_	_	_	_	_	_	_	_	_
B1Y__13285_3	1592	_	_	_	_	_	_	_	_	_	_	_
B1Y__13290_1	108	hypothetical protein	d__Viruses;p__norank;c__norank;o__norank;f__Siphoviridae;g__norank;s__Bacillus phage vB	59	_	_	_	GO:0006139;GO:0006259;GO:0006725;GO:0006807;GO:0008150;GO:0008152;GO:0009987;GO:0015074;GO:0034641;GO:0043170;GO:0044237;GO:0044238;GO:0044260;GO:0046483;GO:0071704;GO:0090304;GO:1901360	_	_	_	_
B1Y__13290_2	755	hypothetical protein	d__Viruses;p__norank;c__norank;o__norank;f__Siphoviridae;g__norank;s__Bacillus phage vB	40	sp|O34481|RECDL_BACSU	ATP-dependent RecD-like DNA helicase OS=Bacillus subtilis (strain 168) OX=224308 GN=yrrC PE=3 SV=1	25.6	_	_	_	K03581	recD
B1Y__13328_1	1049	minor tail protein	d__Viruses;p__norank;c__norank;o__norank;f__norank;g__Audreyjarvisvirus;s__Audreyjarvisvirus AM4 [dsDNA]	34.9	sp|O31976|YOMI_BACSU	SPbeta prophage-derived uncharacterized transglycosylase YomI OS=Bacillus subtilis (strain 168) OX=224308 GN=yomI PE=3 SV=2	28	_	_	_	_	_
B1Y__13341_1	406	_	_	_	_	_	_	_	_	_	_	_
B1Y__13341_2	258	hypothetical protein	d__Viruses;p__norank;c__norank;o__norank;f__Siphoviridae;g__norank;s__Bacillus phage vB	24.5	_	_	_	_	_	_	_	_
B1Y__13344_1	114	_	_	_	_	_	_	_	_	_	_	_
B1Y__13344_2	63	_	_	_	_	_	_	_	_	_	_	_
B1Y__13344_3	166	_	_	_	_	_	_	_	_	_	_	_
B1Y__13344_4	204	_	_	_	_	_	_	_	_	_	_	_
B1Y__13344_5	39	_	_	_	_	_	_	_	_	_	_	_
B1Y__13349_1	84	_	_	_	_	_	_	_	_	_	_	_
B1Y__13349_2	276	putative structural protein	d__Viruses;p__norank;c__norank;o__norank;f__norank;g__Audreyjarvisvirus;s__Audreyjarvisvirus L47 [dsDNA]	32.2	_	_	_	_	_	_	_	_
B1Y__13349_3	234	_	_	_	_	_	_	_	_	_	_	_
B1Y__13349_4	423	_	_	_	_	_	_	_	_	_	_	_
B1Y__13476_1	112	YqaJ viral recombinase family protein	d__Viruses;p__norank;c__norank;o__norank;f__norank;g__Phifelvirus;s__Phifelvirus FL1 [dsDNA]	35.1	_	_	_	GO:0003674;GO:0003824;GO:0004518;GO:0004519;GO:0004520;GO:0004527;GO:0004529;GO:0004536;GO:0006139;GO:0006259;GO:0006725;GO:0006807;GO:0008150;GO:0008152;GO:0009987;GO:0016787;GO:0016788;GO:0034641;GO:0043170;GO:0044237;GO:0044238;GO:0044260;GO:0046483;GO:0071704;GO:0090304;GO:0090305;GO:0140097;GO:1901360	_	_	_	_
B1Y__13476_10	216	_	_	_	_	_	_	_	_	_	_	_
B1Y__13476_11	472	recombinase family protein	d__Viruses;p__norank;c__norank;o__norank;f__Siphoviridae;g__norank;s__Enterococcus phage EFC-1 [dsDNA]	45.4	sp|P10427|YIM3_BPPH1	Uncharacterized immunity region protein 3 OS=Bacillus phage phi105 OX=10717 PE=3 SV=1	45.5	_	_	_	K06400	spoIVCA
B1Y__13476_12	241	N-acetylmuramoyl-L-alanine amidase	d__Viruses;p__norank;c__norank;o__norank;f__norank;g__Kamchatkavirus;s__Kamchatkavirus AP45 [dsDNA]	41.2	_	_	_	_	COG3409|COG5632	M	_	_
B1Y__13476_2	413	DNA helicase	d__Viruses;p__norank;c__norank;o__norank;f__norank;g__Knuthellervirus;s__Knuthellervirus PMBT14 [dsDNA]	24.1	sp|Q9US25|HRP1_SCHPO	Chromodomain helicase hrp1 OS=Schizosaccharomyces pombe (strain 972 / ATCC 24843) OX=284812 GN=hrp1 PE=1 SV=1	38.4	_	COG0553	L	_	_
B1Y__13476_3	97	_	_	_	_	_	_	_	_	_	_	_
B1Y__13476_4	65	_	_	_	_	_	_	_	_	_	_	_
B1Y__13476_5	65	_	_	_	_	_	_	_	_	_	_	_
B1Y__13476_6	63	_	_	_	_	_	_	_	_	_	_	_
B1Y__13476_7	60	_	_	_	_	_	_	_	_	_	_	_
B1Y__13476_8	78	helix-turn-helix transcriptional regulator	d__Viruses;p__norank;c__norank;o__norank;f__norank;g__Fibralongavirus;s__Fibralongavirus fv2638A [dsDNA]	53.6	_	_	_	_	COG1396	K	_	_
B1Y__13476_9	227	XRE family transcriptional regulator	d__Viruses;p__norank;c__norank;o__norank;f__norank;g__Fibralongavirus;s__Fibralongavirus fv2638A [dsDNA]	40.3	_	_	_	_	COG2932	K	_	_
B1Y__13590_1	334	minor tail protein	d__Viruses;p__norank;c__norank;o__norank;f__norank;g__Leonardvirus;s__Leonardvirus ali17 [dsDNA]	45.9	_	_	_	_	COG4409	G	_	_
B1Y__13590_2	198	hypothetical protein	d__Viruses;p__norank;c__norank;o__norank;f__norank;g__Otagovirus;s__Otagovirus Psa374 [dsDNA]	53	_	_	_	_	_	_	_	_
B1Y__13590_3	212	glycoside hydrolase family 19 protein	d__Viruses;p__norank;c__norank;o__norank;f__Siphoviridae;g__norank;s__Pseudomonas phage JBD44 [dsDNA]	44.7	sp|P44187|Y1415_HAEIN	Uncharacterized protein HI_1415 OS=Haemophilus influenzae (strain ATCC 51907 / DSM 11121 / KW20 / Rd) OX=71421 GN=HI_1415 PE=4 SV=1	41.7	_	COG3179	S	K03791	K03791
B1Y__13590_4	94	_	_	_	_	_	_	_	_	_	_	_
B1Y__13647_1	119	_	_	_	_	_	_	_	_	_	_	_
B1Y__13647_2	550	_	_	_	_	_	_	_	_	_	_	_
B1Y__13671_1	105	major CP	d__Viruses;p__norank;c__norank;o__norank;f__Microviridae;g__norank;s__Chimpanzee faeces associated microphage 2 [ssDNA]	79	_	_	_	_	_	_	_	_
B1Y__13671_2	170	minor CP 1	d__Viruses;p__norank;c__norank;o__norank;f__Microviridae;g__norank;s__Chimpanzee faeces associated microphage 2 [ssDNA]	57.9	_	_	_	_	_	_	_	_
B1Y__13671_3	83	nonstructural protein	d__Viruses;p__norank;c__norank;o__norank;f__Microviridae;g__norank;s__Alces alces faeces associated microvirus MP18 4940 [ssDNA]	50	_	_	_	_	_	_	_	_
B1Y__13671_4	38	_	_	_	_	_	_	_	_	_	_	_
B1Y__13671_5	345	replication initiator protein	d__Viruses;p__norank;c__norank;o__norank;f__Microviridae;g__norank;s__Chimpanzee faeces associated microphage 2 [ssDNA]	54.2	_	_	_	_	_	_	_	_
B1Y__13681_1	473	DnaD domain protein	d__Viruses;p__norank;c__norank;o__norank;f__norank;g__Taranisvirus;s__Taranisvirus taranis [dsDNA]	57.5	_	_	_	_	COG3935	L	_	_
B1Y__13681_2	442	replicative DNA helicase	d__Viruses;p__norank;c__norank;o__norank;f__Siphoviridae;g__norank;s__Pseudomonas phage YMC11/02/R656 [dsDNA]	28.9	sp|P03006|VG12_BPP22	Replicative DNA helicase OS=Salmonella phage P22 OX=10754 GN=12 PE=3 SV=1	29.7	_	_	_	K02314	dnaB
B1Y__13681_3	64	_	_	_	_	_	_	_	_	_	_	_
B1Y__13681_4	215	_	_	_	_	_	_	_	_	_	_	_
B1Y__13681_5	371	_	_	_	_	_	_	_	_	_	_	_
B1Y__13681_6	605	_	_	_	_	_	_	_	_	_	_	_
B1Y__13681_7	110	_	_	_	_	_	_	_	_	_	_	_
B1Y__13681_8	428	_	_	_	_	_	_	_	_	_	_	_
B1Y__13726_1	288	minor capsid protein	d__Viruses;p__norank;c__norank;o__norank;f__Microviridae;g__norank;s__Lynx canadensis associated microvirus CLP 9413 [ssDNA]	44	_	_	_	_	_	_	_	_
B1Y__13726_2	565	major capsid protein	d__Viruses;p__norank;c__norank;o__norank;f__Microviridae;g__norank;s__Lynx canadensis associated microvirus CLP 9413 [ssDNA]	65.1	sp|P19192|CAPSD_BPCHP	Capsid protein VP1 OS=Chlamydia phage 1 OX=2003327 GN=ORF1 PE=1 SV=2	40.8	_	_	_	_	_
B1Y__13726_3	173	minor capsid protein	d__Viruses;p__norank;c__norank;o__norank;f__Microviridae;g__norank;s__Lynx canadensis associated microvirus CLP 9413 [ssDNA]	46.1	_	_	_	_	_	_	_	_
B1Y__13726_4	91	nonstructural protein	d__Viruses;p__norank;c__norank;o__norank;f__Microviridae;g__norank;s__Lynx canadensis associated microvirus CLP 9413 [ssDNA]	51.4	_	_	_	_	_	_	_	_
B1Y__13726_5	39	_	_	_	_	_	_	_	_	_	_	_
B1Y__13726_6	119	replication initiation protein	d__Viruses;p__norank;c__norank;o__norank;f__Microviridae;g__norank;s__Lynx canadensis associated microvirus CLP 9413 [ssDNA]	47.5	_	_	_	_	_	_	_	_
B1Y__13776_1	202	_	_	_	_	_	_	_	_	_	_	_
B1Y__13776_2	108	_	_	_	_	_	_	_	_	_	_	_
B1Y__13776_3	82	_	_	_	_	_	_	_	_	_	_	_
B1Y__13776_4	151	_	_	_	_	_	_	_	_	_	_	_
B1Y__13776_5	351	_	_	_	_	_	_	_	_	_	_	_
B1Y__13776_6	131	_	_	_	_	_	_	_	_	_	_	_
B1Y__13776_7	138	_	_	_	_	_	_	_	_	_	_	_
B1Y__13782_1	563	capsid protein	d__Viruses;p__norank;c__norank;o__norank;f__Microviridae;g__Enterogokushovirus;s__Enterogokushovirus EC6098 [ssDNA]	50.5	sp|Q9G059|CAPSD_BPPHM	Capsid protein VP1 OS=Bdellovibrio phage phiMH2K OX=145579 GN=ORF1 PE=3 SV=1	44.1	_	_	_	_	_
B1Y__13782_2	48	_	_	_	_	_	_	_	_	_	_	_
B1Y__13782_3	38	_	_	_	_	_	_	_	_	_	_	_
B1Y__13782_4	124	_	_	_	_	_	_	_	_	_	_	_
B1Y__13830_1	157	_	_	_	_	_	_	_	_	_	_	_
B1Y__13830_2	111	_	_	_	_	_	_	_	_	_	_	_
B1Y__13830_3	40	_	_	_	_	_	_	_	_	_	_	_
B1Y__13830_4	336	replication initiation protein	d__Viruses;p__norank;c__norank;o__norank;f__Microviridae;g__norank;s__Alces alces faeces associated microvirus MP10 5560 [ssDNA]	35.4	_	_	_	_	_	_	_	_
B1Y__13848_1	932	_	_	_	_	_	_	_	_	_	_	_
B1Y__13850_1	21	_	_	_	_	_	_	_	_	_	_	_
B1Y__13850_10	92	_	_	_	_	_	_	_	_	_	_	_
B1Y__13850_11	75	_	_	_	_	_	_	_	_	_	_	_
B1Y__13850_12	703	ribonucleotide reductase	d__Viruses;p__norank;c__norank;o__norank;f__Zierdtviridae;g__Ceetrepovirus;s__Ceetrepovirus kimchi1738 [dsDNA]	62.7	sp|P0CH00|RIR1B_MYCS2	Ribonucleoside-diphosphate reductase subunit alpha 2 OS=Mycobacterium smegmatis (strain ATCC 700084 / mc(2)155) OX=246196 GN=nrdE2 PE=1 SV=1	59.2	GO:0005575;GO:0005622;GO:0005623;GO:0005737;GO:0005829;GO:0005971;GO:0006139;GO:0006725;GO:0006753;GO:0006793;GO:0006796;GO:0006807;GO:0008150;GO:0008152;GO:0009058;GO:0009117;GO:0009165;GO:0009262;GO:0009263;GO:0009987;GO:0015949;GO:0018130;GO:0019438;GO:0019637;GO:0032991;GO:0034641;GO:0034654;GO:0044237;GO:0044238;GO:0044249;GO:0044271;GO:0044281;GO:0044424;GO:0044444;GO:0044445;GO:0044464;GO:…	COG0209	F	K00525	E1.17.4.1A, nrdA, nrdE
B1Y__13850_13	44	_	_	_	_	_	_	_	_	_	_	_
B1Y__13850_2	71	_	_	_	_	_	_	_	_	_	_	_
B1Y__13850_3	35	_	_	_	_	_	_	_	_	_	_	_
B1Y__13850_4	278	putative Band_7 superfamily protein	d__Viruses;p__norank;c__norank;o__norank;f__Myoviridae;g__norank;s__Rhodococcus phage E3 [dsDNA]	41.4	_	_	_	_	_	_	_	_
B1Y__13850_5	114	_	_	_	_	_	_	_	_	_	_	_
B1Y__13850_6	102	_	_	_	_	_	_	_	_	_	_	_
B1Y__13850_7	74	_	_	_	_	_	_	_	_	_	_	_
B1Y__13850_8	78	_	_	_	_	_	_	_	_	_	_	_
B1Y__13850_9	322	ribonucleotide reductase	d__Viruses;p__norank;c__norank;o__norank;f__Zierdtviridae;g__Ceetrepovirus;s__Ceetrepovirus stickynote [dsDNA]	63.1	sp|P9WH71|RIR2B_MYCTU	Ribonucleoside-diphosphate reductase subunit beta nrdF2 OS=Mycobacterium tuberculosis (strain ATCC 25618 / H37Rv) OX=83332 GN=nrdF2 PE=1 SV=1	58.2	GO:0003674;GO:0005488;GO:0005506;GO:0005575;GO:0005622;GO:0005623;GO:0005737;GO:0005829;GO:0005971;GO:0006139;GO:0006259;GO:0006260;GO:0006725;GO:0006753;GO:0006793;GO:0006796;GO:0006807;GO:0008150;GO:0008152;GO:0009058;GO:0009059;GO:0009117;GO:0009165;GO:0009262;GO:0009263;GO:0009987;GO:0018130;GO:0019438;GO:0019637;GO:0030145;GO:0032991;GO:0034641;GO:0034645;GO:0034654;GO:0040007;GO:0043167;GO:…	COG0208	F	K00526	E1.17.4.1B, nrdB, nrdF
B1Y__1386_1	210	major CP	d__Viruses;p__norank;c__norank;o__norank;f__Microviridae;g__norank;s__Chimpanzee faeces associated microphage 3 [ssDNA]	41.7	sp|Q9G059|CAPSD_BPPHM	Capsid protein VP1 OS=Bdellovibrio phage phiMH2K OX=145579 GN=ORF1 PE=3 SV=1	36.5	_	_	_	_	_
B1Y__1386_10	413	putative major capsid protein	d__Viruses;p__norank;c__norank;o__norank;f__Microviridae;g__norank;s__Gokushovirinae GNX3R [ssDNA]	41.9	sp|P19192|CAPSD_BPCHP	Capsid protein VP1 OS=Chlamydia phage 1 OX=2003327 GN=ORF1 PE=1 SV=2	37.7	_	_	_	_	_
B1Y__1386_2	35	_	_	_	_	_	_	_	_	_	_	_
B1Y__1386_3	168	_	_	_	_	_	_	_	_	_	_	_
B1Y__1386_4	87	_	_	_	_	_	_	_	_	_	_	_
B1Y__1386_5	95	_	_	_	_	_	_	_	_	_	_	_
B1Y__1386_6	59	_	_	_	_	_	_	_	_	_	_	_
B1Y__1386_7	509	replication protein VP4	d__Viruses;p__norank;c__norank;o__norank;f__Microviridae;g__norank;s__Gokushovirinae Bog1183	31	_	_	_	_	_	_	_	_
B1Y__1386_8	42	_	_	_	_	_	_	_	_	_	_	_
B1Y__1386_9	265	_	_	_	_	_	_	_	_	_	_	_
B1Y__13962_1	87	_	_	_	_	_	_	_	_	_	_	_
B1Y__13962_10	111	_	_	_	_	_	_	_	_	_	_	_
B1Y__13962_2	185	_	_	_	_	_	_	_	_	_	_	_
B1Y__13962_3	62	_	_	_	_	_	_	_	_	_	_	_
B1Y__13962_4	50	_	_	_	_	_	_	_	_	_	_	_
B1Y__13962_5	47	_	_	_	_	_	_	_	_	_	_	_
B1Y__13962_6	327	_	_	_	_	_	_	_	_	_	_	_
B1Y__13962_7	69	_	_	_	_	_	_	_	_	_	_	_
B1Y__13962_8	179	_	_	_	_	_	_	_	_	_	_	_
B1Y__13962_9	66	_	_	_	_	_	_	_	_	_	_	_
B1Y__13978_1	298	_	_	_	_	_	_	_	_	_	_	_
B1Y__13978_2	570	_	_	_	_	_	_	_	_	_	_	_
B1Y__13978_3	345	terminase large subunit	d__Viruses;p__norank;c__norank;o__norank;f__norank;g__Pepyhexavirus;s__Pepyhexavirus pepy6 [dsDNA]	68.5	_	_	_	_	_	_	_	_
B1Y__13986_1	166	_	_	_	_	_	_	_	_	_	_	_
B1Y__13986_2	91	nonstructural protein	d__Viruses;p__norank;c__norank;o__norank;f__Microviridae;g__norank;s__Chimpanzee faeces associated microphage 2 [ssDNA]	44.3	_	_	_	_	_	_	_	_
B1Y__13986_3	61	_	_	_	_	_	_	_	_	_	_	_
B1Y__13986_4	38	_	_	_	_	_	_	_	_	_	_	_
B1Y__13986_5	329	replication initiator protein	d__Viruses;p__norank;c__norank;o__norank;f__Microviridae;g__norank;s__Chimpanzee faeces associated microphage 2 [ssDNA]	50.8	_	_	_	_	_	_	_	_
B1Y__13986_6	269	_	_	_	_	_	_	_	_	_	_	_
B1Y__13986_7	32	_	_	_	_	_	_	_	_	_	_	_
B1Y__1398_1	160	_	_	_	_	_	_	_	_	_	_	_
B1Y__1398_2	336	_	_	_	_	_	_	_	_	_	_	_
B1Y__1398_3	102	_	_	_	_	_	_	_	_	_	_	_
B1Y__1398_4	69	_	_	_	_	_	_	_	_	_	_	_
B1Y__1398_5	136	_	_	_	_	_	_	_	_	_	_	_
B1Y__1398_6	346	_	_	_	_	_	_	_	_	_	_	_
B1Y__1398_7	57	_	_	_	_	_	_	_	_	_	_	_
B1Y__13994_1	278	_	_	_	_	_	_	_	_	_	_	_
B1Y__13994_2	106	_	_	_	_	_	_	_	_	_	_	_
B1Y__13994_3	73	_	_	_	_	_	_	_	_	_	_	_
B1Y__13994_4	123	_	_	_	_	_	_	_	_	_	_	_
B1Y__13994_5	153	hypothetical protein	d__Viruses;p__norank;c__norank;o__norank;f__norank;g__Sextaecvirus;s__Sextaecvirus sextaec [dsDNA]	36.6	sp|A4XKQ3|RNH_CALS8	Ribonuclease H OS=Caldicellulosiruptor saccharolyticus (strain ATCC 43494 / DSM 8903 / Tp8T 6331) OX=351627 GN=rnhA PE=3 SV=1	41.7	_	_	_	K03469	rnhA, RNASEH1
B1Y__13994_6	33	_	_	_	_	_	_	_	_	_	_	_
B1Y__14046_1	135	hypothetical protein	d__Viruses;p__norank;c__norank;o__norank;f__Siphoviridae;g__norank;s__Bacillus phage vB	40.3	_	_	_	GO:0003674;GO:0003824;GO:0004798;GO:0005575;GO:0005622;GO:0005623;GO:0005737;GO:0006139;GO:0006220;GO:0006221;GO:0006227;GO:0006233;GO:0006235;GO:0006725;GO:0006753;GO:0006793;GO:0006796;GO:0006807;GO:0008150;GO:0008152;GO:0009041;GO:0009058;GO:0009117;GO:0009123;GO:0009132;GO:0009133;GO:0009138;GO:0009139;GO:0009141;GO:0009142;GO:0009147;GO:0009148;GO:0009165;GO:0009186;GO:0009189;GO:0009196;GO:…	COG0125	F	_	_
B1Y__14046_2	202	hypothetical protein	d__Viruses;p__norank;c__norank;o__norank;f__Siphoviridae;g__norank;s__Bacillus phage vB	40.8	_	_	_	_	_	_	_	_
B1Y__14046_3	523	hypothetical protein	d__Viruses;p__norank;c__norank;o__norank;f__Siphoviridae;g__norank;s__Bacillus phage vB	56.3	_	_	_	_	_	_	_	_
B1Y__14046_4	178	_	_	_	_	_	_	_	_	_	_	_
B1Y__14048_1	76	hypothetical protein	d__Viruses;p__norank;c__norank;o__norank;f__Siphoviridae;g__norank;s__Staphylococcus phage SPbeta-like [dsDNA]	47.3	_	_	_	_	_	_	_	_
B1Y__14048_10	399	Exonuclease	d__Viruses;p__norank;c__norank;o__norank;f__Siphoviridae;g__norank;s__Clostridium phage phiCD211 [dsDNA]	26.4	_	_	_	_	_	_	_	_
B1Y__14048_11	849	hypothetical protein	d__Viruses;p__norank;c__norank;o__norank;f__norank;g__Spbetavirus;s__Spbetavirus SPbeta [dsDNA]	43.3	sp|O64076|YONO_BPSPB	DNA-directed RNA polymerase YonO OS=Bacillus phage SPbeta OX=66797 GN=yonO PE=3 SV=1	43.3	_	_	_	_	_
B1Y__14048_12	109	_	_	_	_	_	_	_	_	_	_	_
B1Y__14048_13	97	_	_	_	_	_	_	_	_	_	_	_
B1Y__14048_14	115	_	_	_	_	_	_	_	_	_	_	_
B1Y__14048_15	98	_	_	_	_	_	_	_	_	_	_	_
B1Y__14048_16	150	_	_	_	_	_	_	_	_	_	_	_
B1Y__14048_17	125	_	_	_	_	_	_	_	_	_	_	_
B1Y__14048_18	107	_	_	_	_	_	_	_	_	_	_	_
B1Y__14048_19	110	_	_	_	_	_	_	_	_	_	_	_
B1Y__14048_2	67	_	_	_	_	_	_	_	_	_	_	_
B1Y__14048_20	67	_	_	_	_	_	_	_	_	_	_	_
B1Y__14048_21	72	_	_	_	_	_	_	_	_	_	_	_
B1Y__14048_22	78	_	_	_	_	_	_	_	_	_	_	_
B1Y__14048_23	107	_	_	_	_	_	_	_	_	_	_	_
B1Y__14048_24	101	_	_	_	_	_	_	_	_	_	_	_
B1Y__14048_25	92	_	_	_	_	_	_	_	_	_	_	_
B1Y__14048_26	167	_	_	_	_	_	_	_	_	_	_	_
B1Y__14048_27	86	_	_	_	_	_	_	_	_	_	_	_
B1Y__14048_28	66	_	_	_	_	_	_	_	_	_	_	_
B1Y__14048_29	91	_	_	_	_	_	_	_	_	_	_	_
B1Y__14048_3	499	putative structural protein	d__Viruses;p__norank;c__norank;o__norank;f__Siphoviridae;g__norank;s__Brevibacillus phage Sundance [dsDNA]	31.1	_	_	_	_	_	_	_	_
B1Y__14048_30	134	_	_	_	_	_	_	_	_	_	_	_
B1Y__14048_31	92	_	_	_	_	_	_	_	_	_	_	_
B1Y__14048_32	113	_	_	_	_	_	_	_	_	_	_	_
B1Y__14048_4	554	DNA-packaging protein	d__Viruses;p__norank;c__norank;o__norank;f__Siphoviridae;g__norank;s__Brevibacillus phage Sundance [dsDNA]	31.2	_	_	_	_	_	_	_	_
B1Y__14048_5	387	_	_	_	_	_	_	_	_	_	_	_
B1Y__14048_6	107	_	_	_	_	_	_	_	_	_	_	_
B1Y__14048_7	355	hypothetical protein	d__Viruses;p__norank;c__norank;o__norank;f__norank;g__Henunavirus;s__Henunavirus hena1 [dsDNA]	32.5	_	_	_	_	_	_	_	_
B1Y__14048_8	289	_	_	_	_	_	_	_	_	_	_	_
B1Y__14048_9	337	3''-phosphoadenosine 5''-phosphosulfate sulfotransferase/FAD synthetase-related enzyme	d__Viruses;p__norank;c__norank;o__norank;f__Siphoviridae;g__norank;s__Clostridium phage phiCP34O [dsDNA]	44.3	_	_	_	_	COG0175	EH	_	_
B1Y__14072_1	168	lysin A	d__Viruses;p__norank;c__norank;o__norank;f__norank;g__Kojivirus;s__Kojivirus golden [dsDNA]	42.6	_	_	_	GO:0005575;GO:0005623;GO:0007155;GO:0008150;GO:0009279;GO:0009405;GO:0009987;GO:0016020;GO:0019867;GO:0022610;GO:0030260;GO:0030312;GO:0030313;GO:0031589;GO:0031975;GO:0042710;GO:0043708;GO:0044403;GO:0044409;GO:0044419;GO:0044462;GO:0044464;GO:0044764;GO:0051701;GO:0051704;GO:0051806;GO:0051828;GO:0071944;GO:0090605	COG0860|COG1388|COG3023	MV	_	_
B1Y__14072_2	268	_	_	_	_	_	_	_	_	_	_	_
B1Y__14072_3	902	putative tail protein	d__Viruses;p__norank;c__norank;o__norank;f__norank;g__Lentavirus;s__Lentavirus PMBT5 [dsDNA]	61.7	_	_	_	_	_	_	_	_
B1Y__14099_1	232	_	_	_	_	_	_	_	_	_	_	_
B1Y__14099_2	462	_	_	_	_	_	_	_	_	_	_	_
B1Y__14134_1	517	putative nicotinate phosphoribosyltransferase	d__Viruses;p__norank;c__norank;o__norank;f__norank;g__norank;s__crAssphage cr111	66	sp|Q52I78|NAMPT_PIG	Nicotinamide phosphoribosyltransferase OS=Sus scrofa OX=9823 GN=NAMPT PE=2 SV=2	29.4	_	COG1488	H	K03462	NAMPT
B1Y__14134_2	143	hypothetical protein	d__Viruses;p__norank;c__norank;o__norank;f__norank;g__norank;s__crAssphage cr126	51.2	_	_	_	_	_	_	_	_
B1Y__14134_3	267	putative ribose-phosphate pyrophosphokinase	d__Viruses;p__norank;c__norank;o__norank;f__norank;g__norank;s__crAssphage cr126	45.6	sp|Q0BPP0|KPRS_GRABC	Ribose-phosphate pyrophosphokinase OS=Granulibacter bethesdensis (strain ATCC BAA-1260 / CGDNIH1) OX=391165 GN=prs PE=3 SV=1	25.8	_	_	_	K00948	PRPS, prsA
B1Y__14134_4	43	_	_	_	_	_	_	_	_	_	_	_
B1Y__14134_5	102	_	_	_	_	_	_	_	_	_	_	_
B1Y__14148_1	71	hypothetical protein	d__Viruses;p__norank;c__norank;o__norank;f__Straboviridae;g__Biquartavirus;s__Biquartavirus 44RR2 [dsDNA]	60.6	sp|A0M3N2|GLYA_GRAFK	Serine hydroxymethyltransferase OS=Gramella forsetii (strain KT0803) OX=411154 GN=glyA PE=3 SV=1	70	_	_	_	K00600	glyA, SHMT
B1Y__14148_2	182	DUF2815 family protein	d__Viruses;p__norank;c__norank;o__norank;f__norank;g__Fibralongavirus;s__Fibralongavirus fv2638A [dsDNA]	40.8	_	_	_	_	_	_	_	_
B1Y__14148_3	408	DUF2800 domain-containing protein	d__Viruses;p__norank;c__norank;o__norank;f__Siphoviridae;g__norank;s__Enterococcus phage phiFL4A [dsDNA]	43.6	sp|Q9T1P7|VP51_BPAPS	Putative protein p51 OS=Acyrthosiphon pisum secondary endosymbiont phage 1 OX=67571 GN=51 PE=4 SV=1	29.1	_	_	_	_	_
B1Y__14148_4	77	_	_	_	_	_	_	_	_	_	_	_
B1Y__14148_5	97	_	_	_	_	_	_	_	_	_	_	_
B1Y__14148_6	138	hypothetical protein	d__Viruses;p__norank;c__norank;o__norank;f__norank;g__Vipetofemvirus;s__Vipetofemvirus vipetofem [dsDNA]	43.7	sp|B0C9N7|DUT_ACAM1	Deoxyuridine 5'-triphosphate nucleotidohydrolase OS=Acaryochloris marina (strain MBIC 11017) OX=329726 GN=dut PE=3 SV=1	35.7	GO:0000287;GO:0003674;GO:0003824;GO:0004170;GO:0005488;GO:0006139;GO:0006220;GO:0006221;GO:0006226;GO:0006244;GO:0006725;GO:0006753;GO:0006793;GO:0006796;GO:0006807;GO:0008150;GO:0008152;GO:0009056;GO:0009058;GO:0009117;GO:0009123;GO:0009124;GO:0009129;GO:0009130;GO:0009141;GO:0009143;GO:0009147;GO:0009149;GO:0009157;GO:0009162;GO:0009165;GO:0009166;GO:0009176;GO:0009177;GO:0009200;GO:0009204;GO:…	COG0756	F	K01520	dut, DUT
B1Y__14148_7	236	_	_	_	_	_	_	_	_	_	K03465	thyX, thy1
B1Y__14151_1	164	_	_	_	_	_	_	_	_	_	_	_
B1Y__14151_2	94	_	_	_	_	_	_	_	_	_	_	_
B1Y__14151_3	235	_	_	_	_	_	_	_	_	_	_	_
B1Y__14151_4	104	_	_	_	_	_	_	_	_	_	_	_
B1Y__14151_5	66	_	_	_	_	_	_	_	_	_	_	_
B1Y__14151_6	36	_	_	_	_	_	_	_	_	_	_	_
B1Y__14151_7	79	_	_	_	_	_	_	_	_	_	_	_
B1Y__14151_8	57	_	_	_	_	_	_	_	_	_	_	_
B1Y__14151_9	56	_	_	_	_	_	_	_	_	_	_	_
B1Y__1416_1	150	_	_	_	_	_	_	_	_	_	_	_
B1Y__1416_10	64	hypothetical protein	d__Viruses;p__norank;c__norank;o__norank;f__norank;g__norank;s__crAssphage cr112	43.5	_	_	_	_	_	_	_	_
B1Y__1416_11	182	hypothetical protein	d__Viruses;p__norank;c__norank;o__norank;f__norank;g__norank;s__crAssphage cr106	45.4	_	_	_	_	_	_	_	_
B1Y__1416_2	273	stabilization protein	d__Viruses;p__norank;c__norank;o__norank;f__norank;g__norank;s__crAssphage cr126	50.9	_	_	_	_	_	_	_	_
B1Y__1416_3	95	tail tubular protein	d__Viruses;p__norank;c__norank;o__norank;f__norank;g__norank;s__crAssphage cr116	54.3	_	_	_	_	_	_	_	_
B1Y__1416_4	34	tail tubular protein	d__Viruses;p__norank;c__norank;o__norank;f__norank;g__norank;s__crAssphage cr116	75	_	_	_	_	_	_	_	_
B1Y__1416_5	100	HU/IHF-like	d__Viruses;p__norank;c__norank;o__norank;f__norank;g__norank;s__crAssphage cr85	56.7	_	_	_	_	_	_	_	_
B1Y__1416_6	48	HU/IHF-like protein	d__Viruses;p__norank;c__norank;o__norank;f__Steigviridae;g__Paundivirus;s__Paundivirus hollandii [dsDNA]	63.8	_	_	_	_	_	_	_	_
B1Y__1416_7	89	hypothetical protein	d__Viruses;p__norank;c__norank;o__norank;f__Steigviridae;g__Paundivirus;s__Paundivirus hollandii [dsDNA]	58.6	_	_	_	_	_	_	_	_
B1Y__1416_8	327	hypothetical protein	d__Viruses;p__norank;c__norank;o__norank;f__Steigviridae;g__Paundivirus;s__Paundivirus hollandii [dsDNA]	54.6	_	_	_	_	_	_	_	_
B1Y__1416_9	73	hypothetical protein	d__Viruses;p__norank;c__norank;o__norank;f__Steigviridae;g__Kehishuvirus;s__Kehishuvirus primarius [dsDNA]	62.1	_	_	_	_	_	_	_	_
B1Y__1422_1	145	YopX family protein	d__Viruses;p__norank;c__norank;o__norank;f__norank;g__Phifelvirus;s__Phifelvirus FL2 [dsDNA]	37.1	_	_	_	_	_	_	_	_
B1Y__1422_2	135	hypothetical protein	d__Viruses;p__norank;c__norank;o__norank;f__norank;g__Brussowvirus;s__Brussowvirus bvO1205 [dsDNA]	59.8	_	_	_	_	_	_	_	_
B1Y__1422_3	60	_	_	_	_	_	_	_	_	_	_	_
B1Y__1422_4	101	_	_	_	_	_	_	_	_	_	_	_
B1Y__1422_5	48	_	_	_	_	_	_	_	_	_	_	_
B1Y__1422_6	70	_	_	_	_	_	_	_	_	_	_	_
B1Y__1422_7	69	orf42	d__Viruses;p__norank;c__norank;o__norank;f__norank;g__Brussowvirus;s__Brussowvirus bv858 [dsDNA]	55.8	_	_	_	_	_	_	_	_
B1Y__14240_1	42	_	_	_	_	_	_	_	_	_	_	_
B1Y__14240_2	82	_	_	_	_	_	_	_	_	_	_	_
B1Y__14240_3	77	_	_	_	_	_	_	_	_	_	_	_
B1Y__14240_4	156	minor capsid protein	d__Viruses;p__norank;c__norank;o__norank;f__Microviridae;g__norank;s__Alces alces faeces associated microvirus MP10 5560 [ssDNA]	31.7	_	_	_	_	_	_	_	_
B1Y__14240_5	570	major capsid protein	d__Viruses;p__norank;c__norank;o__norank;f__Microviridae;g__norank;s__Alces alces faeces associated microvirus MP10 5560 [ssDNA]	49.9	sp|Q9G059|CAPSD_BPPHM	Capsid protein VP1 OS=Bdellovibrio phage phiMH2K OX=145579 GN=ORF1 PE=3 SV=1	40.5	_	_	_	_	_
B1Y__14240_6	57	_	_	_	_	_	_	_	_	_	_	_
B1Y__14240_7	223	_	_	_	_	_	_	_	_	_	_	_
B1Y__14240_8	113	replication protein VP4	d__Viruses;p__norank;c__norank;o__norank;f__Microviridae;g__norank;s__Gokushovirinae Fen672	43.3	_	_	_	_	_	_	_	_
B1Y__14245_1	37	_	_	_	_	_	_	_	_	_	_	_
B1Y__14245_2	59	_	_	_	_	_	_	_	_	_	_	_
B1Y__14245_3	134	_	_	_	_	_	_	_	_	_	_	_
B1Y__14245_4	192	hypothetical protein	d__Viruses;p__norank;c__norank;o__norank;f__norank;g__Fukuivirus;s__Fukuivirus MVDC [dsDNA]	34	_	_	_	_	_	_	_	_
B1Y__14245_5	290	hypothetical protein	d__Viruses;p__norank;c__norank;o__norank;f__Siphoviridae;g__norank;s__Bacillus phage vB	34.3	_	_	_	_	_	_	_	_
B1Y__14245_6	86	_	_	_	_	_	_	_	_	_	_	_
B1Y__14245_7	481	RNA ligase	d__Viruses;p__norank;c__norank;o__norank;f__norank;g__Bantamvirus;s__Bantamvirus bantam [dsDNA]	28	_	_	_	_	_	_	_	_
B1Y__14245_8	155	_	_	_	_	_	_	_	_	_	_	_
B1Y__14273_1	49	_	_	_	_	_	_	_	_	_	_	_
B1Y__14273_2	650	putative receptor binding protein	d__Viruses;p__norank;c__norank;o__norank;f__Siphoviridae;g__norank;s__Lactococcus phage 98201 [dsDNA]	34.7	_	_	_	_	COG4926	S	_	_
B1Y__14283_1	418	_	_	_	_	_	_	_	_	_	_	_
B1Y__14283_2	353	hypothetical protein	d__Viruses;p__norank;c__norank;o__norank;f__norank;g__Andromedavirus;s__Andromedavirus curly [dsDNA]	23.8	_	_	_	_	_	_	_	_
B1Y__14283_3	125	_	_	_	_	_	_	_	_	_	_	_
B1Y__1428_1	320	_	_	_	_	_	_	_	_	_	_	_
B1Y__1428_2	169	_	_	_	_	_	_	_	_	_	_	_
B1Y__1428_3	591	major capsid protein VP1	d__Viruses;p__norank;c__norank;o__norank;f__Microviridae;g__norank;s__Parabacteroides phage YZ-2015b [ssDNA]	25.6	_	_	_	_	_	_	_	_
B1Y__1428_4	358	replication protein VP4	d__Viruses;p__norank;c__norank;o__norank;f__Microviridae;g__norank;s__Parabacteroides phage YZ-2015b [ssDNA]	34.6	_	_	_	_	_	_	_	_
B1Y__1429_1	214	_	_	_	_	_	_	_	_	_	_	_
B1Y__1429_10	205	_	_	_	_	_	_	_	_	_	_	_
B1Y__1429_11	166	_	_	_	_	_	_	_	_	_	_	_
B1Y__1429_12	74	_	_	_	_	_	_	_	_	_	_	_
B1Y__1429_13	260	_	_	_	_	_	_	_	_	_	K01613	psd, PISD
B1Y__1429_14	398	Aminidotransferase	d__Viruses;p__norank;c__norank;o__norank;f__norank;g__Fletchervirus;s__Fletchervirus NCTC12673 [dsDNA]	32.3	_	_	_	_	COG1834	E	_	_
B1Y__1429_2	140	_	_	_	_	_	_	_	_	_	_	_
B1Y__1429_3	192	_	_	_	_	_	_	_	_	_	_	_
B1Y__1429_4	158	_	_	_	_	_	_	_	_	_	_	_
B1Y__1429_5	298	thymidylate synthase	d__Viruses;p__norank;c__norank;o__norank;f__norank;g__norank;s__crAssphage cr53	40.4	sp|Q8RQM9|THYX_COREF	Flavin-dependent thymidylate synthase OS=Corynebacterium efficiens (strain DSM 44549 / YS-314 / AJ 12310 / JCM 11189 / NBRC 100395) OX=196164 GN=thyX PE=3 SV=1	37.4	_	_	_	K03465	thyX, thy1
B1Y__1429_6	65	_	_	_	_	_	_	_	_	_	_	_
B1Y__1429_7	223	_	_	_	_	_	_	_	_	_	_	_
B1Y__1429_8	141	Possible homing endonuclease	d__Viruses;p__norank;c__norank;o__norank;f__norank;g__Firehammervirus;s__Firehammervirus CP220 [dsDNA]	39.3	_	_	_	_	_	_	_	_
B1Y__1429_9	371	RecA-like DNA recombinase	d__Viruses;p__norank;c__norank;o__norank;f__norank;g__Bixzunavirus;s__Bixzunavirus Bxz1 [dsDNA]	28.7	sp|Q9XED7|R51A2_MAIZE	DNA repair protein RAD51 homolog B OS=Zea mays OX=4577 GN=RAD51B PE=2 SV=1	24.5	_	_	_	_	_
B1Y__1430_1	61	_	_	_	_	_	_	_	_	_	_	_
B1Y__1430_2	154	_	_	_	_	_	_	_	_	_	_	_
B1Y__1430_3	162	hypothetical protein	d__Viruses;p__norank;c__norank;o__norank;f__Straboviridae;g__Chrysonvirus;s__Chrysonvirus as5 [dsDNA]	34	_	_	_	_	_	_	_	_
B1Y__1430_4	124	_	_	_	_	_	_	_	_	_	_	_
B1Y__1430_5	64	_	_	_	_	_	_	_	_	_	_	_
B1Y__1430_6	62	_	_	_	_	_	_	_	_	_	_	_
B1Y__14318_1	245	_	_	_	_	_	_	_	_	_	K09125	yhhQ
B1Y__14318_2	231	_	_	_	sp|Q5FPE5|GMDH_GLUOX	Glucose 1-dehydrogenase OS=Gluconobacter oxydans (strain 621H) OX=290633 GN=GOX2015 PE=1 SV=1	29.9	_	_	_	_	_
B1Y__14318_3	240	_	_	_	_	_	_	_	_	_	_	_
B1Y__14318_4	325	hypothetical protein	d__Viruses;p__norank;c__norank;o__norank;f__norank;g__Samistivirus;s__Samistivirus jay2jay [dsDNA]	27.2	_	_	_	_	_	_	_	_
B1Y__14318_5	255	_	_	_	_	_	_	_	_	_	_	_
B1Y__14318_6	301	_	_	_	_	_	_	_	_	_	_	_
B1Y__14318_7	56	_	_	_	_	_	_	_	_	_	_	_
B1Y__14332_1	387	_	_	_	_	_	_	_	_	_	_	_
B1Y__14332_2	790	major capsid protein VP1	d__Viruses;p__norank;c__norank;o__norank;f__Microviridae;g__norank;s__Parabacteroides phage YZ-2015b [ssDNA]	28	_	_	_	_	_	_	_	_
B1Y__14332_3	98	_	_	_	_	_	_	_	_	_	_	_
B1Y__14346_1	314	replication initiator protein	d__Viruses;p__norank;c__norank;o__norank;f__Microviridae;g__norank;s__Chimpanzee faeces associated microphage 2 [ssDNA]	37.7	_	_	_	_	_	_	_	_
B1Y__14346_2	221	_	_	_	_	_	_	_	_	_	_	_
B1Y__14346_3	521	major capsid protein	d__Viruses;p__norank;c__norank;o__norank;f__Microviridae;g__norank;s__Alces alces faeces associated microvirus MP10 5560 [ssDNA]	36.6	sp|Q9G059|CAPSD_BPPHM	Capsid protein VP1 OS=Bdellovibrio phage phiMH2K OX=145579 GN=ORF1 PE=3 SV=1	35.6	_	_	_	_	_
B1Y__14346_4	145	_	_	_	_	_	_	_	_	_	_	_
B1Y__14346_5	122	_	_	_	_	_	_	_	_	_	_	_
B1Y__14359_1	204	DNA polymerase I	d__Viruses;p__norank;c__norank;o__norank;f__norank;g__norank;s__crAssphage cr85	92.5	_	_	_	_	_	_	_	_
B1Y__14359_2	257	_	_	_	_	_	_	_	_	_	_	_
B1Y__14359_3	179	DNA polymerase I	d__Viruses;p__norank;c__norank;o__norank;f__norank;g__norank;s__crAssphage cr85	83.4	sp|Q59156|DPO1_CALBD	DNA polymerase I OS=Caldicellulosiruptor bescii (strain ATCC BAA-1888 / DSM 6725 / Z-1320) OX=521460 GN=polA PE=3 SV=2	38.8	_	_	_	_	_
B1Y__1438_1	399	_	_	_	_	_	_	_	_	_	_	_
B1Y__1438_2	113	_	_	_	_	_	_	_	_	_	_	_
B1Y__1438_3	111	_	_	_	_	_	_	_	_	_	_	_
B1Y__1438_4	132	gp21	d__Viruses;p__norank;c__norank;o__norank;f__Siphoviridae;g__norank;s__Brochothrix phage NF5 [dsDNA]	40.4	_	_	_	_	_	_	_	_
B1Y__14399_1	440	terminase large subunit	d__Viruses;p__norank;c__norank;o__norank;f__norank;g__Rimavirus;s__Rimavirus drgrey [dsDNA]	77	_	_	_	_	_	_	_	_
B1Y__14399_2	231	hypothetical protein	d__Viruses;p__norank;c__norank;o__norank;f__norank;g__Coetzeevirus;s__Coetzeevirus JL1 [dsDNA]	30.5	_	_	_	_	_	_	_	_
B1Y__14399_3	171	_	_	_	_	_	_	_	_	_	_	_
B1Y__1440_1	278	_	_	_	_	_	_	_	_	_	_	_
B1Y__1440_2	51	_	_	_	_	_	_	_	_	_	_	_
B1Y__1440_3	272	_	_	_	_	_	_	_	_	_	_	_
B1Y__1440_4	122	major capsid protein	d__Viruses;p__norank;c__norank;o__norank;f__Microviridae;g__norank;s__Lynx canadensis associated microvirus CLP 9413 [ssDNA]	76	_	_	_	_	_	_	_	_
B1Y__14443_1	80	putative single stranded DNA exonuclease	d__Viruses;p__norank;c__norank;o__norank;f__Siphoviridae;g__norank;s__Geobacillus virus E3 [dsDNA]	51.9	sp|O64145|YORK_BPSPB	Putative single-strand DNA-specific exonuclease yorK OS=Bacillus phage SPbeta OX=66797 GN=yorK PE=3 SV=1	44.9	_	COG0608	L	_	_
B1Y__14443_2	257	endonuclease	d__Viruses;p__norank;c__norank;o__norank;f__norank;g__norank;s__crAssphage cr1	47.4	_	_	_	_	_	_	_	_
B1Y__14443_3	364	putative single stranded DNA exonuclease	d__Viruses;p__norank;c__norank;o__norank;f__Siphoviridae;g__norank;s__Geobacillus virus E3 [dsDNA]	35.6	_	_	_	_	COG0608	L	K07462	recJ
B1Y__14443_4	478	Ribonuclease R	d__Viruses;p__norank;c__norank;o__norank;f__Phycodnaviridae;g__norank;s__Orpheovirus IHUMI-LCC2 [dsDNA]	27.4	sp|O67834|RNR_AQUAE	Ribonuclease R OS=Aquifex aeolicus (strain VF5) OX=224324 GN=rnr PE=3 SV=1	42.8	GO:0000175;GO:0003674;GO:0003724;GO:0003824;GO:0004386;GO:0004518;GO:0004527;GO:0004532;GO:0004540;GO:0005575;GO:0005622;GO:0005623;GO:0005737;GO:0005829;GO:0006139;GO:0006396;GO:0006401;GO:0006402;GO:0006725;GO:0006807;GO:0006950;GO:0008150;GO:0008152;GO:0008408;GO:0008997;GO:0009056;GO:0009057;GO:0009266;GO:0009409;GO:0009628;GO:0009892;GO:0009987;GO:0010467;GO:0010468;GO:0010605;GO:0010629;GO:…	COG0557	J	K12573	rnr, vacB
B1Y__14443_5	60	_	_	_	_	_	_	_	_	_	_	_
B1Y__14443_6	713	anaerobic ribonucleotide reductase subunit or ribonucleoside triphosphate reductase	d__Viruses;p__norank;c__norank;o__norank;f__Podoviridae;g__norank;s__Cronobacter phage vB	40.8	sp|P28903|NRDD_ECOLI	Anaerobic ribonucleoside-triphosphate reductase OS=Escherichia coli (strain K12) OX=83333 GN=nrdD PE=1 SV=2	38.2	_	_	_	K21636	nrdD
B1Y__14443_7	298	hypothetical protein	d__Viruses;p__norank;c__norank;o__norank;f__Lavidaviridae;g__norank;s__Yellowstone Lake virophage 5 [dsDNA]	39.7	_	_	_	_	COG0270	H	_	_
B1Y__14443_8	182	putative anaerobic ribonucleoside-triphosphate reductase-activating protein	d__Viruses;p__norank;c__norank;o__norank;f__norank;g__Lahexavirus;s__Lahexavirus LAh9 [dsDNA]	40.5	sp|P0A9N8|NRDG_ECOLI	Anaerobic ribonucleoside-triphosphate reductase-activating protein OS=Escherichia coli (strain K12) OX=83333 GN=nrdG PE=1 SV=1	38.9	GO:0003674;GO:0003824;GO:0005488;GO:0005575;GO:0005622;GO:0005623;GO:0005737;GO:0006139;GO:0006725;GO:0006753;GO:0006793;GO:0006796;GO:0006807;GO:0008150;GO:0008152;GO:0008998;GO:0009058;GO:0009117;GO:0009165;GO:0009262;GO:0009263;GO:0009265;GO:0009394;GO:0009987;GO:0015949;GO:0016491;GO:0016725;GO:0016728;GO:0018130;GO:0019438;GO:0019637;GO:0019692;GO:0031250;GO:0032991;GO:0034641;GO:0034654;GO:…	COG0602	O	K04068	nrdG
B1Y__14452_1	67	_	_	_	_	_	_	_	_	_	_	_
B1Y__14452_2	311	capsid protein	d__Viruses;p__norank;c__norank;o__norank;f__Siphoviridae;g__norank;s__Lactobacillus phage LfeSau [dsDNA]	39.7	_	_	_	_	_	_	_	_
B1Y__14452_3	86	_	_	_	_	_	_	_	_	_	_	_
B1Y__14452_4	176	gp7	d__Viruses;p__norank;c__norank;o__norank;f__Siphoviridae;g__norank;s__Listeria phage P40 [dsDNA]	27.6	_	_	_	_	_	_	_	_
B1Y__14452_5	107	_	_	_	_	_	_	_	_	_	_	_
B1Y__14452_6	140	HK97 gp10 family protein	d__Viruses;p__norank;c__norank;o__norank;f__norank;g__Vedamuthuvirus;s__Vedamuthuvirus P1045 [dsDNA]	36	_	_	_	_	_	_	_	_
B1Y__14452_7	125	_	_	_	_	_	_	_	_	_	_	_
B1Y__14452_8	139	_	_	_	_	_	_	_	_	_	_	_
B1Y__14491_1	518	major capsid protein VP1	d__Viruses;p__norank;c__norank;o__norank;f__Microviridae;g__norank;s__Microviridae Fen685	25.6	_	_	_	_	_	_	_	_
B1Y__14491_2	147	_	_	_	_	_	_	_	_	_	_	_
B1Y__14491_3	31	_	_	_	_	_	_	_	_	_	_	_
B1Y__14519_1	263	DNA primase	d__Viruses;p__norank;c__norank;o__norank;f__Herelleviridae;g__Pecentumvirus;s__Pecentumvirus P100 [dsDNA]	43.6	_	_	_	_	_	_	_	_
B1Y__14519_2	203	_	_	_	_	_	_	_	_	_	_	_
B1Y__14519_3	687	recombination endonuclease	d__Viruses;p__norank;c__norank;o__norank;f__Herelleviridae;g__Pecentumvirus;s__Pecentumvirus list36 [dsDNA]	39.1	sp|Q9RT44|SBCC_DEIRA	Nuclease SbcCD subunit C OS=Deinococcus radiodurans (strain ATCC 13939 / DSM 20539 / JCM 16871 / LMG 4051 / NBRC 15346 / NCIMB 9279 / R1 / VKM B-1422) OX=243230 GN=sbcC PE=3 SV=1	31.8	_	_	_	_	_
B1Y__14519_4	234	recombination exonuclease	d__Viruses;p__norank;c__norank;o__norank;f__Herelleviridae;g__Sepunavirus;s__Sepunavirus IPLAC1C [dsDNA]	49.3	_	_	_	_	_	_	_	_
B1Y__1454_1	309	replication initiation protein	d__Viruses;p__norank;c__norank;o__norank;f__Microviridae;g__norank;s__Lynx canadensis associated microvirus CLP 9413 [ssDNA]	50.4	sp|P11334|REP_SPV4	Replication-associated protein ORF2 OS=Spiroplasma virus 4 OX=10855 GN=ORF2 PE=3 SV=1	28.8	_	_	_	_	_
B1Y__1454_2	38	_	_	_	_	_	_	_	_	_	_	_
B1Y__1454_3	82	nonstructural protein	d__Viruses;p__norank;c__norank;o__norank;f__Microviridae;g__norank;s__Alces alces faeces associated microvirus MP18 4940 [ssDNA]	44.7	_	_	_	_	_	_	_	_
B1Y__1454_4	163	minor capsid protein	d__Viruses;p__norank;c__norank;o__norank;f__Microviridae;g__norank;s__Lynx canadensis associated microvirus CLP 9413 [ssDNA]	55.6	_	_	_	_	_	_	_	_
B1Y__1454_5	557	major capsid protein	d__Viruses;p__norank;c__norank;o__norank;f__Microviridae;g__norank;s__Lynx canadensis associated microvirus CLP 9413 [ssDNA]	70.6	sp|Q9G059|CAPSD_BPPHM	Capsid protein VP1 OS=Bdellovibrio phage phiMH2K OX=145579 GN=ORF1 PE=3 SV=1	41.4	_	_	_	_	_
B1Y__1454_6	121	minor capsid protein	d__Viruses;p__norank;c__norank;o__norank;f__Microviridae;g__norank;s__Lynx canadensis associated microvirus CLP 9413 [ssDNA]	68.6	_	_	_	_	_	_	_	_
B1Y__1455_1	120	_	_	_	_	_	_	_	_	_	_	_
B1Y__1455_2	77	_	_	_	_	_	_	_	_	_	_	_
B1Y__1455_3	77	_	_	_	_	_	_	_	_	_	_	_
B1Y__1455_4	72	_	_	_	_	_	_	_	_	_	_	_
B1Y__1455_5	51	_	_	_	_	_	_	_	_	_	_	_
B1Y__1455_6	62	_	_	_	_	_	_	_	_	_	_	_
B1Y__1455_7	46	_	_	_	_	_	_	_	_	_	_	_
B1Y__1455_8	198	_	_	_	_	_	_	_	_	_	_	_
B1Y__1455_9	239	_	_	_	_	_	_	_	_	_	_	_
B1Y__14561_1	180	hypothetical protein	d__Viruses;p__norank;c__norank;o__norank;f__norank;g__Rimavirus;s__Rimavirus drgrey [dsDNA]	48.9	_	_	_	_	_	_	_	_
B1Y__14561_2	140	hypothetical protein	d__Viruses;p__norank;c__norank;o__norank;f__norank;g__Mudcatvirus;s__Mudcatvirus circum [dsDNA]	56.5	_	_	_	_	_	_	_	_
B1Y__14561_3	1498	tape measure protein	d__Viruses;p__norank;c__norank;o__norank;f__norank;g__Oengusvirus;s__Oengusvirus oengus [dsDNA]	33.6	_	_	_	_	COG5412	S	_	_
B1Y__14561_4	447	lysin A	d__Viruses;p__norank;c__norank;o__norank;f__norank;g__Pikminvirus;s__Pikminvirus pikmin [dsDNA]	68.9	_	_	_	_	COG1388|COG3757	M	_	_
B1Y__14584_1	670	hypothetical protein	d__Viruses;p__norank;c__norank;o__norank;f__norank;g__Deurplevirus;s__Deurplevirus deeppurple [dsDNA]	33.2	sp|P0ACB1|DNAB_SHIFL	Replicative DNA helicase OS=Shigella flexneri OX=623 GN=dnaB PE=3 SV=1	27	_	_	_	K02314	dnaB
B1Y__1458_1	165	putative COOH-NH2 ligase	d__Viruses;p__norank;c__norank;o__norank;f__norank;g__norank;s__crAssphage cr108	52.4	_	_	_	_	_	_	_	_
B1Y__1458_2	210	putative amidotransferase	d__Viruses;p__norank;c__norank;o__norank;f__norank;g__norank;s__crAssphage cr108	40.5	_	_	_	_	_	_	_	_
B1Y__1458_3	223	_	_	_	_	_	_	_	_	_	_	_
B1Y__1458_4	323	hypothetical protein	d__Viruses;p__norank;c__norank;o__norank;f__norank;g__norank;s__crAssphage cr85	32.6	_	_	_	_	_	_	_	_
B1Y__1458_5	77	hypothetical protein	d__Viruses;p__norank;c__norank;o__norank;f__norank;g__Jenstvirus;s__Jenstvirus jenst [dsDNA]	50	_	_	_	_	_	_	_	_
B1Y__14602_1	138	VRR-NUC domain protein	d__Viruses;p__norank;c__norank;o__norank;f__norank;g__Wanderervirus;s__Wanderervirus wanderer [dsDNA]	45.9	_	_	_	_	COG1591	L	_	_
B1Y__14602_10	138	helix-turn-helix domain-containing protein	d__Viruses;p__norank;c__norank;o__norank;f__Siphoviridae;g__norank;s__Bacillus phage phi4B1 [dsDNA]	37.9	_	_	_	_	COG1396	K	_	_
B1Y__14602_11	145	ImmA/IrrE family metallo-endopeptidase	d__Viruses;p__norank;c__norank;o__norank;f__Siphoviridae;g__norank;s__Listeria phage vB	42.4	_	_	_	_	_	_	_	_
B1Y__14602_12	173	_	_	_	_	_	_	_	_	_	_	_
B1Y__14602_13	460	recombinase family protein	d__Viruses;p__norank;c__norank;o__norank;f__Siphoviridae;g__norank;s__Enterococcus phage EFC-1 [dsDNA]	45.6	sp|P06693|TNR7_ENTFL	Transposon Tn917 resolvase OS=Enterococcus faecalis OX=1351 GN=tnpR PE=3 SV=3	35	_	_	_	K06400	spoIVCA
B1Y__14602_14	386	putative cell wall hydrolase/autolysin	d__Viruses;p__norank;c__norank;o__norank;f__norank;g__Becedseptimavirus;s__Becedseptimavirus BCD7 [dsDNA]	29.2	sp|Q06320|CWLC_BACSU	Sporulation-specific N-acetylmuramoyl-L-alanine amidase OS=Bacillus subtilis (strain 168) OX=224308 GN=cwlC PE=1 SV=1	29.6	GO:0005575;GO:0018995;GO:0019012;GO:0030430;GO:0033643;GO:0033646;GO:0043656;GO:0043657;GO:0044215;GO:0044216;GO:0044217;GO:0044423;GO:0046729	_	_	K01448	amiABC
B1Y__14602_15	85	_	_	_	_	_	_	_	_	_	_	_
B1Y__14602_16	140	_	_	_	_	_	_	_	_	_	_	_
B1Y__14602_17	86	_	_	_	_	_	_	_	_	_	_	_
B1Y__14602_18	353	RNA binding protein	d__Viruses;p__norank;c__norank;o__norank;f__norank;g__norank;s__crAssphage cr50	42.7	_	_	_	_	COG3344	L	K00986	ltrA
B1Y__14602_2	65	_	_	_	_	_	_	_	_	_	_	_
B1Y__14602_3	129	_	_	_	_	_	_	_	_	_	_	_
B1Y__14602_4	436	DEAD/DEAH box helicase	d__Viruses;p__norank;c__norank;o__norank;f__norank;g__Wanderervirus;s__Wanderervirus wanderer [dsDNA]	47.3	_	_	_	_	COG0553	L	_	_
B1Y__14602_5	203	_	_	_	_	_	_	_	_	_	_	_
B1Y__14602_6	68	_	_	_	_	_	_	_	_	_	_	_
B1Y__14602_7	43	_	_	_	_	_	_	_	_	_	_	_
B1Y__14602_8	35	_	_	_	_	_	_	_	_	_	_	_
B1Y__14602_9	71	_	_	_	_	_	_	_	_	_	_	_
B1Y__14636_1	97	NAD-dependent DNA ligase LigA	d__Viruses;p__norank;c__norank;o__norank;f__Siphoviridae;g__norank;s__Clostridium phage c-st [dsDNA]	51.1	sp|B8I3I1|DNLJ_CLOCE	DNA ligase OS=Clostridium cellulolyticum (strain ATCC 35319 / DSM 5812 / JCM 6584 / H10) OX=394503 GN=ligA PE=3 SV=1	49.5	_	_	_	_	_
B1Y__14636_2	104	_	_	_	_	_	_	_	_	_	_	_
B1Y__14636_3	297	_	_	_	_	_	_	_	_	_	_	_
B1Y__14636_4	419	conserved hypothetical phage-related protein	d__Viruses;p__norank;c__norank;o__norank;f__Siphoviridae;g__norank;s__Clostridium phage c-st [dsDNA]	22.8	_	_	_	_	_	_	_	_
B1Y__14677_1	70	_	_	_	_	_	_	_	_	_	_	_
B1Y__14677_2	88	_	_	_	_	_	_	_	_	_	_	_
B1Y__14677_3	210	_	_	_	_	_	_	_	_	_	_	_
B1Y__14677_4	162	_	_	_	_	_	_	_	_	_	_	_
B1Y__14677_5	203	hypothetical protein	d__Viruses;p__norank;c__norank;o__norank;f__Herelleviridae;g__Schiekvirus;s__Schiekvirus EfV12 [dsDNA]	29.8	sp|Q0H8X2|BI1_USTMA	Probable intron-encoded endonuclease bI1 OS=Ustilago maydis (strain 521 / FGSC 9021) OX=237631 GN=bI1 PE=3 SV=2	32.3	_	COG3860	L	_	_
B1Y__14677_6	150	_	_	_	_	_	_	_	_	_	_	_
B1Y__14677_7	67	_	_	_	_	_	_	_	_	_	_	_
B1Y__14677_8	161	_	_	_	sp|B3QTP6|RUVC_CHLT3	Crossover junction endodeoxyribonuclease RuvC OS=Chloroherpeton thalassium (strain ATCC 35110 / GB-78) OX=517418 GN=ruvC PE=3 SV=1	28.8	_	_	_	K01159	ruvC
B1Y__14700_1	47	_	_	_	_	_	_	_	_	_	_	_
B1Y__14700_10	35	_	_	_	_	_	_	_	_	_	_	_
B1Y__14700_11	270	_	_	_	_	_	_	_	_	_	_	_
B1Y__14700_2	61	_	_	_	_	_	_	_	_	_	_	_
B1Y__14700_3	212	_	_	_	_	_	_	_	_	_	_	_
B1Y__14700_4	122	_	_	_	_	_	_	_	_	_	_	_
B1Y__14700_5	69	_	_	_	_	_	_	_	_	_	_	_
B1Y__14700_6	138	_	_	_	_	_	_	_	_	_	_	_
B1Y__14700_7	319	_	_	_	_	_	_	_	_	_	_	_
B1Y__14700_8	77	_	_	_	_	_	_	_	_	_	_	_
B1Y__14700_9	68	_	_	_	_	_	_	_	_	_	_	_
B1Y__14705_1	202	_	_	_	_	_	_	_	_	_	_	_
B1Y__14705_2	351	_	_	_	_	_	_	_	_	_	_	_
B1Y__14705_3	165	_	_	_	_	_	_	_	_	_	_	_
B1Y__14709_1	227	_	_	_	_	_	_	_	_	_	_	_
B1Y__14709_2	621	_	_	_	_	_	_	_	_	_	_	_
B1Y__14709_3	149	_	_	_	_	_	_	_	_	_	_	_
B1Y__14709_4	389	_	_	_	_	_	_	_	_	_	_	_
B1Y__14709_5	55	_	_	_	_	_	_	_	_	_	_	_
B1Y__14709_6	396	_	_	_	_	_	_	_	_	_	_	_
B1Y__14718_1	94	gp639	d__Viruses;p__norank;c__norank;o__norank;f__norank;g__Donellivirus;s__Donellivirus gee [dsDNA]	52.9	_	_	_	_	_	_	_	_
B1Y__14718_2	137	_	_	_	_	_	_	_	_	_	K07171	mazF, ndoA, chpA
B1Y__14718_3	174	DNA ligase	d__Viruses;p__norank;c__norank;o__norank;f__norank;g__Yangvirus;s__Arthobacter virus Yang [dsDNA]	52.3	_	_	_	GO:0003674;GO:0003824;GO:0003909;GO:0003911;GO:0005575;GO:0005622;GO:0005623;GO:0005737;GO:0005829;GO:0006139;GO:0006259;GO:0006266;GO:0006281;GO:0006284;GO:0006288;GO:0006725;GO:0006807;GO:0006950;GO:0006974;GO:0008150;GO:0008152;GO:0009987;GO:0016874;GO:0016886;GO:0033554;GO:0034641;GO:0043170;GO:0044237;GO:0044238;GO:0044260;GO:0044424;GO:0044444;GO:0044464;GO:0046483;GO:0050896;GO:0051103;GO:…	COG0272	L	_	_
B1Y__14718_4	114	_	_	_	_	_	_	_	_	_	_	_
B1Y__14718_5	228	_	_	_	_	_	_	_	_	_	_	_
B1Y__14718_6	351	DnaX DNA polymerase III clamp loader complex gamma-tau-delta subunit	d__Viruses;p__norank;c__norank;o__norank;f__Siphoviridae;g__norank;s__Streptococcus phage Dp-1 [dsDNA]	47.3	sp|P09122|DPO3X_BACSU	DNA polymerase III subunit gamma/tau OS=Bacillus subtilis (strain 168) OX=224308 GN=dnaX PE=3 SV=3	34.1	GO:0008150;GO:0016032;GO:0019058;GO:0019079;GO:0039686;GO:0039693;GO:0044403;GO:0044419;GO:0051704	_	_	K02343	dnaX
B1Y__14718_7	65	_	_	_	_	_	_	_	_	_	_	_
B1Y__14718_8	129	_	_	_	_	_	_	_	_	_	_	_
B1Y__14732_1	53	_	_	_	_	_	_	_	_	_	_	_
B1Y__14732_2	158	_	_	_	_	_	_	_	_	_	_	_
B1Y__14732_3	78	_	_	_	_	_	_	_	_	_	_	_
B1Y__14732_4	368	hypothetical protein	d__Viruses;p__norank;c__norank;o__norank;f__norank;g__Anamdongvirus;s__Anamdongvirus LBR48 [dsDNA]	36.6	_	_	_	_	_	_	_	_
B1Y__14732_5	165	_	_	_	_	_	_	_	_	_	_	_
B1Y__14761_1	134	major capsid protein	d__Viruses;p__norank;c__norank;o__norank;f__Microviridae;g__norank;s__Lynx canadensis associated microvirus CLP 9413 [ssDNA]	63.2	sp|Q9G059|CAPSD_BPPHM	Capsid protein VP1 OS=Bdellovibrio phage phiMH2K OX=145579 GN=ORF1 PE=3 SV=1	41.2	_	_	_	_	_
B1Y__14761_2	178	minor CP 1	d__Viruses;p__norank;c__norank;o__norank;f__Microviridae;g__norank;s__Chimpanzee faeces associated microphage 2 [ssDNA]	38.3	_	_	_	_	_	_	_	_
B1Y__14761_3	94	_	_	_	_	_	_	_	_	_	_	_
B1Y__14761_4	269	replication initiation protein	d__Viruses;p__norank;c__norank;o__norank;f__Microviridae;g__norank;s__Alces alces faeces associated microvirus MP18 4940 [ssDNA]	38	_	_	_	_	_	_	_	_
B1Y__14763_1	70	_	_	_	_	_	_	_	_	_	_	_
B1Y__14763_2	515	tail fibers protein	d__Viruses;p__norank;c__norank;o__norank;f__Guelinviridae;g__Gregsiragusavirus;s__Gregsiragusavirus CPS1 [dsDNA]	48.1	sp|P07534|DIT9_BPPZA	Tail knob protein gp9 OS=Bacillus phage PZA OX=10757 GN=9 PE=3 SV=1	27	GO:0005575;GO:0019012;GO:0044423;GO:0098015	_	_	_	_
B1Y__14763_3	419	hypothetical protein	d__Viruses;p__norank;c__norank;o__norank;f__Guelinviridae;g__Susfortunavirus;s__Susfortunavirus susfortuna [dsDNA]	40	sp|Q8K9M4|Y310_BUCAP	Uncharacterized metalloprotease BUsg_310 OS=Buchnera aphidicola subsp. Schizaphis graminum (strain Sg) OX=198804 GN=BUsg_310 PE=3 SV=1	42.3	GO:0005575;GO:0008150;GO:0016032;GO:0018995;GO:0019012;GO:0019058;GO:0019062;GO:0022610;GO:0033643;GO:0033644;GO:0043657;GO:0044215;GO:0044216;GO:0044217;GO:0044218;GO:0044228;GO:0044279;GO:0044403;GO:0044406;GO:0044419;GO:0044423;GO:0044650;GO:0051704;GO:0098015;GO:0098024	_	_	_	_
B1Y__14800_1	37	_	_	_	_	_	_	_	_	_	_	_
B1Y__14800_2	827	_	_	_	_	_	_	_	_	_	_	_
B1Y__14805_1	368	_	_	_	_	_	_	_	_	_	_	_
B1Y__14805_2	608	_	_	_	_	_	_	_	_	_	_	_
B1Y__14805_3	110	_	_	_	_	_	_	_	_	_	_	_
B1Y__14805_4	189	_	_	_	_	_	_	_	_	_	_	_
B1Y__14805_5	195	_	_	_	_	_	_	_	_	_	_	_
B1Y__14809_1	330	putative ATPase	d__Viruses;p__norank;c__norank;o__norank;f__Myoviridae;g__norank;s__Acinetobacter phage YMC13/03/R2096 [dsDNA]	36.9	_	_	_	_	_	_	_	_
B1Y__14809_2	114	_	_	_	_	_	_	_	_	_	_	_
B1Y__14809_3	138	hypothetical protein	d__Viruses;p__norank;c__norank;o__norank;f__norank;g__norank;s__crAssphage cr116	42	_	_	_	_	_	_	_	_
B1Y__14809_4	79	_	_	_	_	_	_	_	_	_	_	_
B1Y__14809_5	70	hypothetical protein	d__Viruses;p__norank;c__norank;o__norank;f__Steigviridae;g__Paundivirus;s__Paundivirus hollandii [dsDNA]	57.7	_	_	_	_	_	_	_	_
B1Y__14809_6	68	_	_	_	_	_	_	_	_	_	_	_
B1Y__14809_7	93	prohibitin family protein	d__Viruses;p__norank;c__norank;o__norank;f__Steigviridae;g__Paundivirus;s__Paundivirus hollandii [dsDNA]	77.6	_	_	_	_	_	_	_	_
B1Y__14821_1	562	_	_	_	_	_	_	_	_	_	_	_
B1Y__14821_2	238	_	_	_	_	_	_	_	_	_	_	_
B1Y__1482_1	250	_	_	_	_	_	_	_	_	_	_	_
B1Y__1482_2	210	_	_	_	_	_	_	_	_	_	_	_
B1Y__1482_3	266	_	_	_	_	_	_	_	_	_	_	_
B1Y__1482_4	136	_	_	_	_	_	_	_	_	_	_	_
B1Y__1482_5	105	_	_	_	_	_	_	_	_	_	_	_
B1Y__1482_6	202	_	_	_	_	_	_	_	_	_	_	_
B1Y__1482_7	104	_	_	_	_	_	_	_	_	_	_	_
B1Y__14865_1	156	_	_	_	sp|Q92ME3|XERD_RHIME	Tyrosine recombinase XerD OS=Rhizobium meliloti (strain 1021) OX=266834 GN=xerD PE=3 SV=1	29.1	_	_	_	_	_
B1Y__14865_2	189	_	_	_	_	_	_	_	_	_	_	_
B1Y__14865_3	100	_	_	_	_	_	_	_	_	_	_	_
B1Y__14865_4	70	_	_	_	_	_	_	_	_	_	_	_
B1Y__14865_5	72	_	_	_	_	_	_	_	_	_	_	_
B1Y__14865_6	67	_	_	_	_	_	_	_	_	_	_	_
B1Y__14865_7	410	_	_	_	_	_	_	_	_	_	_	_
B1Y__14871_1	183	replication initiation protein	d__Viruses;p__norank;c__norank;o__norank;f__Microviridae;g__norank;s__Alces alces faeces associated microvirus MP10 5560 [ssDNA]	43.7	_	_	_	_	_	_	_	_
B1Y__14871_2	222	_	_	_	_	_	_	_	_	_	_	_
B1Y__14871_3	57	_	_	_	_	_	_	_	_	_	_	_
B1Y__14871_4	572	major capsid protein	d__Viruses;p__norank;c__norank;o__norank;f__Microviridae;g__norank;s__Alces alces faeces associated microvirus MP10 5560 [ssDNA]	50	sp|Q9G059|CAPSD_BPPHM	Capsid protein VP1 OS=Bdellovibrio phage phiMH2K OX=145579 GN=ORF1 PE=3 SV=1	40.8	_	_	_	_	_
B1Y__14871_5	120	minor capsid protein	d__Viruses;p__norank;c__norank;o__norank;f__Microviridae;g__norank;s__Alces alces faeces associated microvirus MP10 5560 [ssDNA]	35.8	_	_	_	_	_	_	_	_
B1Y__1488_1	110	_	_	_	_	_	_	_	_	_	_	_
B1Y__1488_2	68	_	_	_	_	_	_	_	_	_	_	_
B1Y__1488_3	96	_	_	_	_	_	_	_	_	_	_	_
B1Y__1488_4	100	_	_	_	_	_	_	_	_	_	_	_
B1Y__1488_5	54	_	_	_	_	_	_	_	_	_	_	_
B1Y__1488_6	158	_	_	_	_	_	_	_	_	_	_	_
B1Y__1488_7	230	_	_	_	_	_	_	_	_	_	_	_
B1Y__14922_1	336	_	_	_	_	_	_	_	_	_	_	_
B1Y__14922_2	153	_	_	_	_	_	_	_	_	_	_	_
B1Y__14922_3	138	_	_	_	_	_	_	_	_	_	_	_
B1Y__14922_4	82	_	_	_	_	_	_	_	_	_	_	_
B1Y__14922_5	124	_	_	_	_	_	_	_	_	_	_	_
B1Y__14922_6	37	_	_	_	_	_	_	_	_	_	_	_
B1Y__14922_7	298	_	_	_	_	_	_	_	_	_	_	_
B1Y__14922_8	69	_	_	_	_	_	_	_	_	_	_	_
B1Y__14922_9	518	_	_	_	_	_	_	_	_	_	K06909	xtmB
B1Y__14930_1	92	_	_	_	_	_	_	_	_	_	_	_
B1Y__14930_2	268	_	_	_	_	_	_	_	_	_	_	_
B1Y__14930_3	130	_	_	_	_	_	_	_	_	_	_	_
B1Y__14930_4	78	_	_	_	_	_	_	_	_	_	_	_
B1Y__14946_1	105	_	_	_	_	_	_	_	_	_	_	_
B1Y__14946_2	204	_	_	_	_	_	_	_	_	_	_	_
B1Y__14946_3	152	_	_	_	_	_	_	_	_	_	_	_
B1Y__14946_4	123	_	_	_	_	_	_	_	_	_	_	_
B1Y__14946_5	87	_	_	_	_	_	_	_	_	_	_	_
B1Y__14958_1	538	_	_	_	_	_	_	_	_	_	_	_
B1Y__14958_2	64	_	_	_	_	_	_	_	_	_	_	_
B1Y__14958_3	59	_	_	_	_	_	_	_	_	_	_	_
B1Y__14958_4	44	_	_	_	_	_	_	_	_	_	_	_
B1Y__14967_1	40	_	_	_	_	_	_	_	_	_	_	_
B1Y__14967_2	53	_	_	_	_	_	_	_	_	_	_	_
B1Y__14967_3	293	IS200/IS605 family element transposase accessory protein TnpB	d__Viruses;p__norank;c__norank;o__norank;f__Siphoviridae;g__norank;s__Clostridium phage c-st [dsDNA]	49.3	_	_	_	_	_	_	K07496	K07496
B1Y__14967_4	82	_	_	_	_	_	_	_	_	_	_	_
B1Y__14968_1	687	_	_	_	_	_	_	_	_	_	_	_
B1Y__14968_2	582	_	_	_	_	_	_	_	_	_	_	_
B1Y__14968_3	167	_	_	_	_	_	_	_	_	_	_	_
B1Y__14991_1	107	_	_	_	_	_	_	_	_	_	_	_
B1Y__14991_10	91	_	_	_	_	_	_	_	_	_	_	_
B1Y__14991_11	32	_	_	_	_	_	_	_	_	_	_	_
B1Y__14991_2	69	hypothetical protein	d__Viruses;p__norank;c__norank;o__norank;f__Kyanoviridae;g__Ahtivirus;s__Ahtivirus sagseatwo [dsDNA]	38.3	_	_	_	_	_	_	_	_
B1Y__14991_3	118	_	_	_	_	_	_	_	_	_	_	_
B1Y__14991_4	81	_	_	_	_	_	_	_	_	_	_	_
B1Y__14991_5	293	_	_	_	_	_	_	_	_	_	_	_
B1Y__14991_6	521	_	_	_	_	_	_	_	_	_	_	_
B1Y__14991_7	137	_	_	_	_	_	_	_	_	_	_	_
B1Y__14991_8	63	_	_	_	_	_	_	_	_	_	_	_
B1Y__14991_9	144	_	_	_	_	_	_	_	_	_	_	_
B1Y__15016_1	149	_	_	_	_	_	_	_	_	_	_	_
B1Y__15016_2	642	DNA polymerase	d__Viruses;p__norank;c__norank;o__norank;f__Salasmaviridae;g__Salasvirus;s__Salasvirus Goe6 [dsDNA]	35.3	sp|B7SSM2|DPOL_BPNF	DNA polymerase OS=Bacillus phage Nf OX=10753 GN=2 PE=1 SV=1	34.7	GO:0003674;GO:0003824;GO:0003887;GO:0006139;GO:0006259;GO:0006725;GO:0006807;GO:0008150;GO:0008152;GO:0009058;GO:0009059;GO:0009987;GO:0016032;GO:0016740;GO:0016772;GO:0016779;GO:0018130;GO:0019058;GO:0019079;GO:0019438;GO:0034061;GO:0034641;GO:0034645;GO:0034654;GO:0039687;GO:0039693;GO:0043170;GO:0044237;GO:0044238;GO:0044249;GO:0044260;GO:0044271;GO:0044403;GO:0044419;GO:0046483;GO:0051704;GO:…	_	_	_	_
B1Y__15016_3	71	_	_	_	_	_	_	_	_	_	_	_
B1Y__15016_4	347	terminase	d__Viruses;p__norank;c__norank;o__norank;f__Salasmaviridae;g__Bundooravirus;s__Bundooravirus whyphy [dsDNA]	26.3	_	_	_	_	_	_	_	_
B1Y__15016_5	67	_	_	_	_	_	_	_	_	_	_	_
B1Y__15016_6	242	lysin A	d__Viruses;p__norank;c__norank;o__norank;f__norank;g__Pikminvirus;s__Pikminvirus pikmin [dsDNA]	35.5	_	_	_	_	COG1388|COG3757	M	K07273	acm
B1Y__15016_7	199	tail-type lysozyme domain-containing protein	d__Viruses;p__norank;c__norank;o__norank;f__Salasmaviridae;g__Salasvirus;s__Salasvirus phi29 [dsDNA]	40	sp|P15132|GP13_BPPH2	Morphogenesis protein 1 OS=Bacillus phage phi29 OX=10756 GN=13 PE=1 SV=2	40	_	_	_	_	_
B1Y__15016_8	103	_	_	_	_	_	_	_	_	_	_	_
B1Y__15016_9	51	_	_	_	_	_	_	_	_	_	_	_
B1Y__15018_1	418	capsid protein	d__Viruses;p__norank;c__norank;o__norank;f__Microviridae;g__Enterogokushovirus;s__Enterogokushovirus EC6098 [ssDNA]	54.8	sp|Q9G059|CAPSD_BPPHM	Capsid protein VP1 OS=Bdellovibrio phage phiMH2K OX=145579 GN=ORF1 PE=3 SV=1	52.2	_	_	_	_	_
B1Y__15018_2	147	internal scaffolding protein VP3	d__Viruses;p__norank;c__norank;o__norank;f__Microviridae;g__norank;s__Gokushovirinae GNX3R [ssDNA]	39.2	_	_	_	_	_	_	_	_
B1Y__15018_3	111	_	_	_	_	_	_	_	_	_	_	_
B1Y__15018_4	217	replication protein VP4	d__Viruses;p__norank;c__norank;o__norank;f__Microviridae;g__norank;s__Gokushovirinae Bog1183	43	_	_	_	_	_	_	_	_
B1Y__15019_1	293	_	_	_	_	_	_	_	_	_	_	_
B1Y__15019_2	139	_	_	_	_	_	_	_	_	_	_	_
B1Y__15019_3	217	hypothetical protein	d__Viruses;p__norank;c__norank;o__norank;f__norank;g__Samwavirus;s__Samwavirus samW [dsDNA]	53.5	_	_	_	_	COG3325	G	_	_
B1Y__15019_4	67	_	_	_	_	_	_	_	_	_	_	_
B1Y__15019_5	390	_	_	_	_	_	_	_	_	_	_	_
B1Y__15020_1	93	_	_	_	_	_	_	_	_	_	_	_
B1Y__15020_10	46	_	_	_	_	_	_	_	_	_	_	_
B1Y__15020_11	30	_	_	_	_	_	_	_	_	_	_	_
B1Y__15020_12	295	replication initiation protein	d__Viruses;p__norank;c__norank;o__norank;f__Microviridae;g__norank;s__Alces alces faeces associated microvirus MP15 5067 [ssDNA]	40.5	_	_	_	_	_	_	_	_
B1Y__15020_13	82	_	_	_	_	_	_	_	_	_	_	_
B1Y__15020_14	554	major capsid protein VP1	d__Viruses;p__norank;c__norank;o__norank;f__Microviridae;g__norank;s__Microviridae Fen7918	32.9	sp|P19192|CAPSD_BPCHP	Capsid protein VP1 OS=Chlamydia phage 1 OX=2003327 GN=ORF1 PE=1 SV=2	30.8	_	_	_	_	_
B1Y__15020_15	20	_	_	_	_	_	_	_	_	_	_	_
B1Y__15020_2	256	_	_	_	_	_	_	_	_	_	_	_
B1Y__15020_3	45	_	_	_	_	_	_	_	_	_	_	_
B1Y__15020_4	30	_	_	_	_	_	_	_	_	_	_	_
B1Y__15020_5	295	replication initiation protein	d__Viruses;p__norank;c__norank;o__norank;f__Microviridae;g__norank;s__Alces alces faeces associated microvirus MP15 5067 [ssDNA]	40.3	_	_	_	_	_	_	_	_
B1Y__15020_6	82	_	_	_	_	_	_	_	_	_	_	_
B1Y__15020_7	554	major capsid protein	d__Viruses;p__norank;c__norank;o__norank;f__Microviridae;g__norank;s__Alces alces faeces associated microvirus MP11 5517 [ssDNA]	34.7	sp|Q9G059|CAPSD_BPPHM	Capsid protein VP1 OS=Bdellovibrio phage phiMH2K OX=145579 GN=ORF1 PE=3 SV=1	30.5	_	_	_	_	_
B1Y__15020_8	122	_	_	_	_	_	_	_	_	_	_	_
B1Y__15020_9	269	_	_	_	_	_	_	_	_	_	_	_
B1Y__15063_1	60	_	_	_	_	_	_	_	_	_	_	_
B1Y__15063_2	413	tail protein	d__Viruses;p__norank;c__norank;o__norank;f__Guelinviridae;g__Gregsiragusavirus;s__Gregsiragusavirus phi24R [dsDNA]	42.3	sp|P07534|DIT9_BPPZA	Tail knob protein gp9 OS=Bacillus phage PZA OX=10757 GN=9 PE=3 SV=1	25.5	GO:0005575;GO:0019012;GO:0044423;GO:0098015	_	_	_	_
B1Y__15063_3	218	hypothetical protein	d__Viruses;p__norank;c__norank;o__norank;f__Guelinviridae;g__Susfortunavirus;s__Susfortunavirus susfortuna [dsDNA]	41.7	sp|P44693|Y409_HAEIN	Uncharacterized metalloprotease HI_0409 OS=Haemophilus influenzae (strain ATCC 51907 / DSM 11121 / KW20 / Rd) OX=71421 GN=HI_0409 PE=3 SV=1	40.3	GO:0005575;GO:0008150;GO:0016032;GO:0018995;GO:0019012;GO:0019058;GO:0019062;GO:0022610;GO:0033643;GO:0033644;GO:0043657;GO:0044215;GO:0044216;GO:0044217;GO:0044218;GO:0044228;GO:0044279;GO:0044403;GO:0044406;GO:0044419;GO:0044423;GO:0044650;GO:0051704;GO:0098015;GO:0098024	_	_	_	_
B1Y__15065_1	63	_	_	_	_	_	_	_	_	_	_	_
B1Y__15065_2	106	_	_	_	_	_	_	_	_	_	_	_
B1Y__15065_3	103	_	_	_	_	_	_	_	_	_	_	_
B1Y__15065_4	59	_	_	_	_	_	_	_	_	_	_	_
B1Y__15065_5	124	_	_	_	_	_	_	_	_	_	_	_
B1Y__15065_6	117	_	_	_	_	_	_	_	_	_	_	_
B1Y__15077_1	404	major CP	d__Viruses;p__norank;c__norank;o__norank;f__Microviridae;g__norank;s__Chimpanzee faeces associated microphage 2 [ssDNA]	62.8	_	_	_	_	_	_	_	_
B1Y__15077_2	167	minor capsid protein	d__Viruses;p__norank;c__norank;o__norank;f__Microviridae;g__norank;s__Lynx canadensis associated microvirus CLP 9413 [ssDNA]	44.4	_	_	_	_	_	_	_	_
B1Y__15077_3	91	_	_	_	_	_	_	_	_	_	_	_
B1Y__15077_4	38	_	_	_	_	_	_	_	_	_	_	_
B1Y__15077_5	327	replication initiator protein	d__Viruses;p__norank;c__norank;o__norank;f__Microviridae;g__norank;s__Chimpanzee faeces associated microphage 2 [ssDNA]	53	sp|Q9G050|REP_BPPHM	Replication-associated protein VP4 OS=Bdellovibrio phage phiMH2K OX=145579 GN=ORF4 PE=3 SV=1	27.7	_	_	_	_	_
B1Y__15077_6	58	_	_	_	_	_	_	_	_	_	_	_
B1Y__15077_7	120	_	_	_	_	_	_	_	_	_	_	_
B1Y__15096_1	732	_	_	_	_	_	_	_	_	_	_	_
B1Y__15141_1	1286	tape measure protein	d__Viruses;p__norank;c__norank;o__norank;f__norank;g__Oengusvirus;s__Oengusvirus oengus [dsDNA]	32.4	_	_	_	_	COG5412	S	_	_
B1Y__15156_1	37	_	_	_	_	_	_	_	_	_	_	_
B1Y__15156_2	101	_	_	_	_	_	_	_	_	_	_	_
B1Y__15156_3	161	_	_	_	sp|Q7VJT9|GREA_HELHP	Transcription elongation factor GreA OS=Helicobacter hepaticus (strain ATCC 51449 / 3B1) OX=235279 GN=greA PE=3 SV=1	33.5	_	_	_	_	_
B1Y__15156_4	147	_	_	_	_	_	_	_	_	_	_	_
B1Y__15156_5	85	_	_	_	_	_	_	_	_	_	_	_
B1Y__15156_6	280	_	_	_	_	_	_	_	_	_	_	_
B1Y__151_1	81	_	_	_	_	_	_	_	_	_	_	_
B1Y__151_2	96	_	_	_	_	_	_	_	_	_	_	_
B1Y__15219_1	59	_	_	_	_	_	_	_	_	_	_	_
B1Y__15219_10	91	_	_	_	_	_	_	_	_	_	_	_
B1Y__15219_11	273	_	_	_	_	_	_	_	_	_	_	_
B1Y__15219_12	60	_	_	_	_	_	_	_	_	_	_	_
B1Y__15219_13	64	_	_	_	_	_	_	_	_	_	_	_
B1Y__15219_14	28	_	_	_	_	_	_	_	_	_	_	_
B1Y__15219_2	65	_	_	_	_	_	_	_	_	_	_	_
B1Y__15219_3	94	_	_	_	_	_	_	_	_	_	_	_
B1Y__15219_4	93	_	_	_	_	_	_	_	_	_	_	_
B1Y__15219_5	225	_	_	_	_	_	_	_	_	_	_	_
B1Y__15219_6	45	_	_	_	_	_	_	_	_	_	_	_
B1Y__15219_7	206	_	_	_	_	_	_	_	_	_	_	_
B1Y__15219_8	80	_	_	_	_	_	_	_	_	_	_	_
B1Y__15219_9	502	_	_	_	_	_	_	_	_	_	_	_
B1Y__15222_1	247	DNA primase	d__Viruses;p__norank;c__norank;o__norank;f__norank;g__Audreyjarvisvirus;s__Audreyjarvisvirus WRP3 [dsDNA]	29.5	_	_	_	_	_	_	_	_
B1Y__15222_2	523	DNA helicase	d__Viruses;p__norank;c__norank;o__norank;f__norank;g__Latrobevirus;s__Latrobevirus FNU1 [dsDNA]	24.6	_	_	_	_	_	_	_	_
B1Y__15222_3	182	_	_	_	_	_	_	_	_	_	_	_
B1Y__15222_4	398	_	_	_	_	_	_	_	_	_	_	_
B1Y__15222_5	68	_	_	_	_	_	_	_	_	_	_	_
B1Y__15223_1	537	major capsid protein	d__Viruses;p__norank;c__norank;o__norank;f__Microviridae;g__norank;s__Lepus americanus faeces associated microvirus SHP1 6472 [ssDNA]	56.1	_	_	_	_	_	_	_	_
B1Y__15223_2	103	_	_	_	_	_	_	_	_	_	_	_
B1Y__15223_3	355	minor capsid protein	d__Viruses;p__norank;c__norank;o__norank;f__Microviridae;g__norank;s__Lepus americanus faeces associated microvirus SHP1 6472 [ssDNA]	32.5	_	_	_	_	_	_	_	_
B1Y__15223_4	85	replication initiation protein	d__Viruses;p__norank;c__norank;o__norank;f__Microviridae;g__norank;s__Lepus americanus faeces associated microvirus SHP1 6472 [ssDNA]	38.8	_	_	_	_	_	_	_	_
B1Y__15227_1	87	hypothetical protein	d__Viruses;p__norank;c__norank;o__norank;f__Smacoviridae;g__Porprismacovirus;s__Porcine associated porprismacovirus 4 [ssDNA]	66.7	_	_	_	_	_	_	_	_
B1Y__15227_2	363	Cap protein	d__Viruses;p__norank;c__norank;o__norank;f__Smacoviridae;g__Porprismacovirus;s__Porcine associated porprismacovirus 8 [ssDNA]	49.1	_	_	_	_	_	_	_	_
B1Y__15227_3	256	putative replicase protein	d__Viruses;p__norank;c__norank;o__norank;f__Smacoviridae;g__norank;s__Pig stool associated circular ssDNA virus GER2011 [ssDNA]	95.8	_	_	_	_	_	_	_	_
B1Y__15227_4	31	_	_	_	_	_	_	_	_	_	_	_
B1Y__15229_1	48	_	_	_	_	_	_	_	_	_	_	_
B1Y__15229_2	293	minor capsid protein	d__Viruses;p__norank;c__norank;o__norank;f__Microviridae;g__norank;s__Alces alces faeces associated microvirus MP18 4940 [ssDNA]	43.5	_	_	_	_	_	_	_	_
B1Y__15229_3	230	major capsid protein	d__Viruses;p__norank;c__norank;o__norank;f__Microviridae;g__norank;s__Lynx canadensis associated microvirus CLP 9413 [ssDNA]	71.4	sp|P19192|CAPSD_BPCHP	Capsid protein VP1 OS=Chlamydia phage 1 OX=2003327 GN=ORF1 PE=1 SV=2	48.3	_	_	_	_	_
B1Y__15255_1	32	_	_	_	_	_	_	_	_	_	_	_
B1Y__15255_2	189	_	_	_	_	_	_	_	_	_	_	_
B1Y__15255_3	50	_	_	_	_	_	_	_	_	_	_	_
B1Y__15255_4	47	_	_	_	_	_	_	_	_	_	_	_
B1Y__15255_5	358	_	_	_	_	_	_	_	_	_	_	_
B1Y__15255_6	79	_	_	_	_	_	_	_	_	_	_	_
B1Y__15255_7	131	_	_	_	_	_	_	_	_	_	_	_
B1Y__15263_1	168	_	_	_	_	_	_	_	_	_	_	_
B1Y__15263_2	73	_	_	_	_	_	_	_	_	_	_	_
B1Y__15263_3	345	_	_	_	_	_	_	_	_	_	_	_
B1Y__15263_4	271	_	_	_	_	_	_	_	_	_	_	_
B1Y__15275_1	80	_	_	_	_	_	_	_	_	_	_	_
B1Y__15275_2	80	_	_	_	_	_	_	_	_	_	_	_
B1Y__15275_3	61	_	_	_	_	_	_	_	_	_	_	_
B1Y__15275_4	217	_	_	_	_	_	_	_	_	_	_	_
B1Y__15279_1	189	major capsid protein	d__Viruses;p__norank;c__norank;o__norank;f__Microviridae;g__norank;s__Lynx canadensis associated microvirus CLP 9413 [ssDNA]	79.3	_	_	_	_	_	_	_	_
B1Y__15279_2	273	minor capsid protein	d__Viruses;p__norank;c__norank;o__norank;f__Microviridae;g__norank;s__Lynx canadensis associated microvirus CLP 9413 [ssDNA]	55.8	_	_	_	_	_	_	_	_
B1Y__15279_3	319	replication initiation protein	d__Viruses;p__norank;c__norank;o__norank;f__Microviridae;g__norank;s__Lynx canadensis associated microvirus CLP 9413 [ssDNA]	47.2	_	_	_	_	_	_	_	_
B1Y__15279_4	38	_	_	_	_	_	_	_	_	_	_	_
B1Y__15279_5	54	_	_	_	_	_	_	_	_	_	_	_
B1Y__15279_6	89	_	_	_	_	_	_	_	_	_	_	_
B1Y__15279_7	163	_	_	_	_	_	_	_	_	_	_	_
B1Y__15279_8	417	major capsid protein	d__Viruses;p__norank;c__norank;o__norank;f__Microviridae;g__norank;s__Lynx canadensis associated microvirus CLP 9413 [ssDNA]	65.1	_	_	_	_	_	_	_	_
B1Y__15306_1	98	_	_	_	_	_	_	_	_	_	_	_
B1Y__15306_2	40	_	_	_	_	_	_	_	_	_	_	_
B1Y__15306_3	325	replication protein VP4	d__Viruses;p__norank;c__norank;o__norank;f__Microviridae;g__norank;s__Gokushovirinae GNX3R [ssDNA]	44.1	_	_	_	_	_	_	_	_
B1Y__15306_4	94	_	_	_	_	_	_	_	_	_	_	_
B1Y__15306_5	151	internal scaffolding protein VP3	d__Viruses;p__norank;c__norank;o__norank;f__Microviridae;g__norank;s__Gokushovirinae Bog5712	29	sp|Q9G053|B_BPPHM	Internal scaffolding protein VP3 OS=Bdellovibrio phage phiMH2K OX=145579 GN=ORF3 PE=3 SV=1	30.6	_	_	_	_	_
B1Y__15306_6	164	capsid protein	d__Viruses;p__norank;c__norank;o__norank;f__Microviridae;g__Enterogokushovirus;s__Enterogokushovirus EC6098 [ssDNA]	62.8	sp|P19192|CAPSD_BPCHP	Capsid protein VP1 OS=Chlamydia phage 1 OX=2003327 GN=ORF1 PE=1 SV=2	50.6	_	_	_	_	_
B1Y__15309_1	207	DNA methylase	d__Viruses;p__norank;c__norank;o__norank;f__Kyanoviridae;g__Alisovirus;s__Alisovirus socal22 [dsDNA]	42.8	sp|Q45489|MTB2_BACIU	Modification methylase BglII OS=Bacillus subtilis OX=1423 GN=bglIIM PE=3 SV=1	27.2	_	COG0863|COG2189	L	_	_
B1Y__15309_2	342	_	_	_	_	_	_	_	_	_	_	_
B1Y__15309_3	233	putative HNH endonuclease	d__Viruses;p__norank;c__norank;o__norank;f__norank;g__Limdunavirus;s__Limdunavirus LN04 [dsDNA]	31.4	_	_	_	_	_	_	_	_
B1Y__15309_4	408	_	_	_	_	_	_	_	_	_	_	_
B1Y__15309_5	355	_	_	_	_	_	_	_	_	_	_	_
B1Y__15309_6	76	_	_	_	_	_	_	_	_	_	_	_
B1Y__15309_7	479	_	_	_	_	_	_	_	_	_	_	_
B1Y__15315_1	148	_	_	_	_	_	_	_	_	_	_	_
B1Y__15315_2	179	_	_	_	_	_	_	_	_	_	_	_
B1Y__15315_3	45	_	_	_	_	_	_	_	_	_	_	_
B1Y__15315_4	332	_	_	_	_	_	_	_	_	_	_	_
B1Y__15315_5	116	_	_	_	_	_	_	_	_	_	_	_
B1Y__1531_1	216	_	_	_	_	_	_	_	_	_	_	_
B1Y__1531_2	137	_	_	_	_	_	_	_	_	_	_	_
B1Y__1531_3	600	_	_	_	_	_	_	_	_	_	_	_
B1Y__1531_4	503	_	_	_	_	_	_	_	_	_	_	_
B1Y__1531_5	59	_	_	_	_	_	_	_	_	_	_	_
B1Y__1531_6	65	_	_	_	_	_	_	_	_	_	_	_
B1Y__1533_1	56	_	_	_	_	_	_	_	_	_	_	_
B1Y__1533_10	172	_	_	_	_	_	_	_	_	_	_	_
B1Y__1533_11	72	_	_	_	_	_	_	_	_	_	_	_
B1Y__1533_12	222	_	_	_	_	_	_	_	_	_	_	_
B1Y__1533_13	49	_	_	_	_	_	_	_	_	_	_	_
B1Y__1533_2	56	_	_	_	_	_	_	_	_	_	_	_
B1Y__1533_3	54	_	_	_	_	_	_	_	_	_	_	_
B1Y__1533_4	52	_	_	_	_	_	_	_	_	_	_	_
B1Y__1533_5	185	_	_	_	_	_	_	_	_	_	_	_
B1Y__1533_6	53	_	_	_	_	_	_	_	_	_	_	_
B1Y__1533_7	71	_	_	_	_	_	_	_	_	_	_	_
B1Y__1533_8	400	_	_	_	_	_	_	_	_	_	_	_
B1Y__1533_9	86	_	_	_	_	_	_	_	_	_	_	_
B1Y__15369_1	81	_	_	_	sp|P20045|REPB_LACPN	Replication protein RepB OS=Lactobacillus plantarum OX=1590 GN=repB PE=3 SV=1	50	_	_	_	_	_
B1Y__15369_10	158	_	_	_	sp|P03858|REPY_STAAU	Replication protein OS=Staphylococcus aureus OX=1280 GN=repF PE=3 SV=2	37.3	_	_	_	_	_
B1Y__15369_2	56	_	_	_	_	_	_	_	_	_	_	_
B1Y__15369_3	91	_	_	_	_	_	_	_	_	_	_	_
B1Y__15369_4	393	_	_	_	_	_	_	_	_	_	_	_
B1Y__15369_5	155	_	_	_	_	_	_	_	_	_	_	_
B1Y__15369_6	48	_	_	_	_	_	_	_	_	_	_	_
B1Y__15369_7	237	_	_	_	_	_	_	_	_	_	_	_
B1Y__15369_8	69	_	_	_	_	_	_	_	_	_	_	_
B1Y__15369_9	51	_	_	_	_	_	_	_	_	_	_	_
B1Y__15378_1	60	_	_	_	_	_	_	_	_	_	_	_
B1Y__15378_2	52	_	_	_	_	_	_	_	_	_	_	_
B1Y__15378_3	206	_	_	_	_	_	_	_	_	_	_	_
B1Y__15378_4	365	replicative DNA helicase	d__Viruses;p__norank;c__norank;o__norank;f__norank;g__norank;s__crAssphage cr85	28.9	sp|P57611|DNAB_BUCAI	Replicative DNA helicase OS=Buchnera aphidicola subsp. Acyrthosiphon pisum (strain APS) OX=107806 GN=dnaB PE=3 SV=1	24.2	_	_	_	_	_
B1Y__15378_5	231	ATPase	d__Viruses;p__norank;c__norank;o__norank;f__norank;g__norank;s__crAssphage cr128	38.5	_	_	_	_	_	_	_	_
B1Y__15378_6	202	_	_	_	_	_	_	_	_	_	_	_
B1Y__15378_7	36	_	_	_	_	_	_	_	_	_	_	_
B1Y__15402_1	104	_	_	_	_	_	_	_	_	_	_	_
B1Y__15402_2	252	regulatory protein	d__Viruses;p__norank;c__norank;o__norank;f__norank;g__norank;s__crAssphage cr114	67.1	_	_	_	_	_	_	_	_
B1Y__15402_3	117	regulatory protein	d__Viruses;p__norank;c__norank;o__norank;f__norank;g__norank;s__crAssphage cr60	62.1	_	_	_	_	_	_	_	_
B1Y__15429_1	150	_	_	_	_	_	_	_	_	_	_	_
B1Y__15429_2	71	_	_	_	_	_	_	_	_	_	_	_
B1Y__15429_3	79	hypothetical protein	d__Viruses;p__norank;c__norank;o__norank;f__norank;g__Eagleeyevirus;s__Eagleeyevirus eagleeye [dsDNA]	58.3	_	_	_	_	_	_	_	_
B1Y__15429_4	92	hypothetical protein	d__Viruses;p__norank;c__norank;o__norank;f__norank;g__Jenstvirus;s__Jenstvirus jenst [dsDNA]	44.6	_	_	_	_	_	_	_	_
B1Y__15429_5	318	hypothetical protein	d__Viruses;p__norank;c__norank;o__norank;f__norank;g__norank;s__crAssphage cr85	33.2	_	_	_	_	_	_	_	_
B1Y__15429_6	138	_	_	_	_	_	_	_	_	_	_	_
B1Y__15431_1	305	major head protein	d__Viruses;p__norank;c__norank;o__norank;f__Salasmaviridae;g__Karezivirus;s__Karezivirus karezi [dsDNA]	37.5	sp|Q37888|CAPSD_BPB03	Major capsid protein OS=Bacillus phage B103 OX=10778 GN=8 PE=3 SV=1	36.7	_	_	_	_	_
B1Y__15431_10	642	DNA polymerase	d__Viruses;p__norank;c__norank;o__norank;f__Salasmaviridae;g__Beecentumtrevirus;s__Beecentumtrevirus Goe1 [dsDNA]	35.4	sp|B7SSM2|DPOL_BPNF	DNA polymerase OS=Bacillus phage Nf OX=10753 GN=2 PE=1 SV=1	35.2	GO:0003674;GO:0003824;GO:0003887;GO:0006139;GO:0006259;GO:0006725;GO:0006807;GO:0008150;GO:0008152;GO:0009058;GO:0009059;GO:0009987;GO:0016032;GO:0016740;GO:0016772;GO:0016779;GO:0018130;GO:0019058;GO:0019079;GO:0019438;GO:0034061;GO:0034641;GO:0034645;GO:0034654;GO:0039687;GO:0039693;GO:0043170;GO:0044237;GO:0044238;GO:0044249;GO:0044260;GO:0044271;GO:0044403;GO:0044419;GO:0046483;GO:0051704;GO:…	_	_	_	_
B1Y__15431_11	228	_	_	_	_	_	_	_	_	_	_	_
B1Y__15431_12	117	_	_	_	_	_	_	_	_	_	_	_
B1Y__15431_13	101	_	_	_	_	_	_	_	_	_	_	_
B1Y__15431_14	96	_	_	_	_	_	_	_	_	_	_	_
B1Y__15431_15	68	_	_	_	_	_	_	_	_	_	_	_
B1Y__15431_2	112	_	_	_	_	_	_	_	_	_	_	_
B1Y__15431_3	227	tail-type lysozyme domain-containing protein	d__Viruses;p__norank;c__norank;o__norank;f__Salasmaviridae;g__Salasvirus;s__Salasvirus PZA [dsDNA]	51.5	sp|P07538|GP13_BPPZA	Morphogenesis protein 1 OS=Bacillus phage PZA OX=10757 GN=13 PE=3 SV=1	51.5	_	_	_	_	_
B1Y__15431_4	274	_	_	_	_	_	_	_	_	_	K07273	acm
B1Y__15431_5	74	_	_	_	_	_	_	_	_	_	_	_
B1Y__15431_6	346	DNA encapsidation protein	d__Viruses;p__norank;c__norank;o__norank;f__norank;g__Dybvigvirus;s__Dybvigvirus Av1 [dsDNA]	24.2	_	_	_	GO:0003674;GO:0003676;GO:0003723;GO:0003824;GO:0005488;GO:0008150;GO:0016032;GO:0016462;GO:0016787;GO:0016817;GO:0016818;GO:0016887;GO:0017111;GO:0019058;GO:0019068;GO:0019072;GO:0019073;GO:0044403;GO:0044419;GO:0051704;GO:0097159;GO:1901363	_	_	_	_
B1Y__15431_7	55	_	_	_	_	_	_	_	_	_	_	_
B1Y__15431_8	52	_	_	_	_	_	_	_	_	_	_	_
B1Y__15431_9	46	_	_	_	_	_	_	_	_	_	_	_
B1Y__15432_1	146	_	_	_	_	_	_	_	_	_	_	_
B1Y__15432_2	133	_	_	_	_	_	_	_	_	_	_	_
B1Y__15432_3	83	_	_	_	_	_	_	_	_	_	_	_
B1Y__15432_4	80	_	_	_	_	_	_	_	_	_	_	_
B1Y__15432_5	181	dUTP diphosphatase DutB	d__Viruses;p__norank;c__norank;o__norank;f__norank;g__Spbetavirus;s__Spbetavirus SPbeta [dsDNA]	50.3	sp|O31801|YNCF_BACSU	Probable deoxyuridine 5'-triphosphate nucleotidohydrolase YncF OS=Bacillus subtilis (strain 168) OX=224308 GN=yncF PE=1 SV=1	51.2	_	_	_	K01520	dut, DUT
B1Y__15432_6	177	_	_	_	_	_	_	_	_	_	K01159	ruvC
B1Y__15432_7	51	_	_	_	_	_	_	_	_	_	_	_
B1Y__15434_1	195	DNA helicase	d__Viruses;p__norank;c__norank;o__norank;f__Zierdtviridae;g__Ceetrepovirus;s__Corynebacterium virus Zion [dsDNA]	29.2	_	_	_	_	_	_	_	_
B1Y__15434_2	322	_	_	_	_	_	_	_	_	_	_	_
B1Y__15434_3	126	_	_	_	_	_	_	_	_	_	_	_
B1Y__15434_4	161	_	_	_	_	_	_	_	_	_	_	_
B1Y__15434_5	186	_	_	_	_	_	_	_	_	_	_	_
B1Y__1543_1	74	_	_	_	_	_	_	_	_	_	_	_
B1Y__1543_2	504	major capsid protein	d__Viruses;p__norank;c__norank;o__norank;f__Microviridae;g__norank;s__Alces alces faeces associated microvirus MP21 4718 [ssDNA]	47.2	sp|Q9G059|CAPSD_BPPHM	Capsid protein VP1 OS=Bdellovibrio phage phiMH2K OX=145579 GN=ORF1 PE=3 SV=1	39.5	_	_	_	_	_
B1Y__1543_3	120	_	_	_	_	_	_	_	_	_	_	_
B1Y__15440_1	125	major capsid protein	d__Viruses;p__norank;c__norank;o__norank;f__Microviridae;g__norank;s__Alces alces faeces associated microvirus MP10 5560 [ssDNA]	51.2	sp|Q9G059|CAPSD_BPPHM	Capsid protein VP1 OS=Bdellovibrio phage phiMH2K OX=145579 GN=ORF1 PE=3 SV=1	46.8	_	_	_	_	_
B1Y__15440_2	165	minor CP 1	d__Viruses;p__norank;c__norank;o__norank;f__Microviridae;g__norank;s__Chimpanzee faeces associated microphage 2 [ssDNA]	30.1	_	_	_	_	_	_	_	_
B1Y__15440_3	113	_	_	_	_	_	_	_	_	_	_	_
B1Y__15440_4	39	_	_	_	_	_	_	_	_	_	_	_
B1Y__15440_5	320	replication initiation protein	d__Viruses;p__norank;c__norank;o__norank;f__Microviridae;g__norank;s__Alces alces faeces associated microvirus MP18 4940 [ssDNA]	39.4	_	_	_	_	_	_	_	_
B1Y__15440_6	231	_	_	_	_	_	_	_	_	_	_	_
B1Y__15440_7	448	major capsid protein	d__Viruses;p__norank;c__norank;o__norank;f__Microviridae;g__norank;s__Lynx canadensis associated microvirus CLP 9413 [ssDNA]	47.8	sp|P11333|CAPSD_SPV4	Capsid protein VP1 OS=Spiroplasma virus 4 OX=10855 GN=ORF1 PE=1 SV=1	40	_	_	_	_	_
B1Y__15465_1	50	DNA methylase	d__Viruses;p__norank;c__norank;o__norank;f__norank;g__Helsingorvirus;s__Helsingorvirus Cba121 [dsDNA]	63.8	_	_	_	_	_	_	_	_
B1Y__15465_2	74	_	_	_	_	_	_	_	_	_	_	_
B1Y__15465_3	61	_	_	_	_	_	_	_	_	_	_	_
B1Y__15465_4	80	_	_	_	_	_	_	_	_	_	_	_
B1Y__15465_5	58	_	_	_	_	_	_	_	_	_	_	_
B1Y__15465_6	200	hypothetical protein	d__Viruses;p__norank;c__norank;o__norank;f__Herelleviridae;g__Matervirus;s__Matervirus mater [dsDNA]	44.2	_	_	_	_	_	_	_	_
B1Y__15465_7	294	ribonucleotide-diphosphate reductase beta subunit	d__Viruses;p__norank;c__norank;o__norank;f__norank;g__Agricanvirus;s__Agricanvirus Ea3570 [dsDNA]	53	sp|P69924|RIR2_ECOLI	Ribonucleoside-diphosphate reductase 1 subunit beta OS=Escherichia coli (strain K12) OX=83333 GN=nrdB PE=1 SV=2	54	_	_	_	K00526	E1.17.4.1B, nrdB, nrdF
B1Y__1546_1	76	_	_	_	_	_	_	_	_	_	_	_
B1Y__1546_2	230	_	_	_	_	_	_	_	_	_	_	_
B1Y__1546_3	141	_	_	_	_	_	_	_	_	_	_	_
B1Y__1546_4	288	_	_	_	_	_	_	_	_	_	_	_
B1Y__15475_1	98	_	_	_	_	_	_	_	_	_	_	_
B1Y__15475_2	127	_	_	_	_	_	_	_	_	_	_	_
B1Y__15475_3	102	_	_	_	_	_	_	_	_	_	_	_
B1Y__15475_4	117	HK97 gp10 family protein	d__Viruses;p__norank;c__norank;o__norank;f__norank;g__Phifelvirus;s__Phifelvirus FL1 [dsDNA]	38.6	_	_	_	_	_	_	_	_
B1Y__15475_5	130	_	_	_	_	_	_	_	_	_	_	_
B1Y__15475_6	177	major tail protein, TP901-1 family	d__Viruses;p__norank;c__norank;o__norank;f__Siphoviridae;g__norank;s__Streptococcus phage SMP [dsDNA]	42	_	_	_	_	_	_	_	_
B1Y__15480_1	128	replication protein VP4	d__Viruses;p__norank;c__norank;o__norank;f__Microviridae;g__norank;s__Gokushovirinae GNX3R [ssDNA]	51.9	_	_	_	_	_	_	_	_
B1Y__15480_2	243	_	_	_	_	_	_	_	_	_	_	_
B1Y__15480_3	83	_	_	_	_	_	_	_	_	_	_	_
B1Y__15480_4	394	major CP	d__Viruses;p__norank;c__norank;o__norank;f__Microviridae;g__norank;s__Chimpanzee faeces associated microphage 2 [ssDNA]	44.4	_	_	_	_	_	_	_	_
B1Y__15490_1	65	_	_	_	_	_	_	_	_	_	_	_
B1Y__15490_10	96	ABC-type cobalt transporter	d__Viruses;p__norank;c__norank;o__norank;f__norank;g__norank;s__crAssphage cr85	57.9	_	_	_	_	_	_	_	_
B1Y__15490_11	149	hypothetical protein	d__Viruses;p__norank;c__norank;o__norank;f__norank;g__norank;s__crAssphage cr85	65.7	_	_	_	_	_	_	_	_
B1Y__15490_12	85	_	_	_	_	_	_	_	_	_	_	_
B1Y__15490_13	70	hypothetical protein	d__Viruses;p__norank;c__norank;o__norank;f__norank;g__norank;s__crAssphage cr85	60.3	_	_	_	_	_	_	_	_
B1Y__15490_2	69	hypothetical protein	d__Viruses;p__norank;c__norank;o__norank;f__norank;g__norank;s__crAssphage cr116	82.4	_	_	_	_	_	_	_	_
B1Y__15490_3	65	_	_	_	_	_	_	_	_	_	_	_
B1Y__15490_4	262	prohibitin family protein	d__Viruses;p__norank;c__norank;o__norank;f__Steigviridae;g__Paundivirus;s__Paundivirus hollandii [dsDNA]	94.7	_	_	_	_	_	_	_	_
B1Y__15490_5	169	hypothetical protein	d__Viruses;p__norank;c__norank;o__norank;f__norank;g__norank;s__crAssphage cr116	86.9	_	_	_	_	_	_	_	_
B1Y__15490_6	380	putative HKD family nuclease	d__Viruses;p__norank;c__norank;o__norank;f__norank;g__norank;s__crAssphage cr85	75.5	_	_	_	_	_	_	_	_
B1Y__15490_7	200	hypothetical protein	d__Viruses;p__norank;c__norank;o__norank;f__norank;g__norank;s__crAssphage cr85	74.1	_	_	_	_	_	_	_	_
B1Y__15490_8	402	replicative DNA helicase	d__Viruses;p__norank;c__norank;o__norank;f__norank;g__norank;s__crAssphage cr126	58.1	_	_	_	_	_	_	_	_
B1Y__15490_9	257	ATP/GTP-binding protein	d__Viruses;p__norank;c__norank;o__norank;f__norank;g__norank;s__crAssphage cr85	93.4	_	_	_	_	_	_	_	_
B1Y__154_1	507	_	_	_	_	_	_	_	_	_	_	_
B1Y__154_2	124	_	_	_	_	_	_	_	_	_	_	_
B1Y__154_3	117	_	_	_	_	_	_	_	_	_	_	_
B1Y__15544_1	39	_	_	_	_	_	_	_	_	_	_	_
B1Y__15544_2	88	_	_	_	_	_	_	_	_	_	_	_
B1Y__15544_3	573	major capsid protein	d__Viruses;p__norank;c__norank;o__norank;f__Microviridae;g__norank;s__Lynx canadensis associated microvirus CLP 9413 [ssDNA]	40.2	sp|P11333|CAPSD_SPV4	Capsid protein VP1 OS=Spiroplasma virus 4 OX=10855 GN=ORF1 PE=1 SV=1	36.7	_	_	_	_	_
B1Y__15544_4	207	capsid protein VP2-related protein	d__Viruses;p__norank;c__norank;o__norank;f__Microviridae;g__Chlamydiamicrovirus;s__Chlamydiamicrovirus CPG1 [ssDNA]	43.8	_	_	_	_	_	_	_	_
B1Y__15544_5	76	_	_	_	_	_	_	_	_	_	_	_
B1Y__1554_1	493	_	_	_	_	_	_	_	_	_	_	_
B1Y__1554_2	56	_	_	_	_	_	_	_	_	_	_	_
B1Y__1554_3	168	DUF669 domain-containing protein	d__Viruses;p__norank;c__norank;o__norank;f__Siphoviridae;g__norank;s__Lactobacillus phage LfeSau [dsDNA]	36.9	_	_	_	_	_	_	_	_
B1Y__1554_4	234	AAA family ATPase	d__Viruses;p__norank;c__norank;o__norank;f__norank;g__Ashduovirus;s__Ashduovirus A2 [dsDNA]	31.2	_	_	_	_	_	_	_	_
B1Y__1554_5	105	siphovirus Gp157 family protein	d__Viruses;p__norank;c__norank;o__norank;f__norank;g__Rockefellervirus;s__Rockefellervirus IME134801 [dsDNA]	49	_	_	_	_	_	_	_	_
B1Y__15554_1	112	_	_	_	_	_	_	_	_	_	_	_
B1Y__15554_2	89	_	_	_	_	_	_	_	_	_	_	_
B1Y__15554_3	224	_	_	_	_	_	_	_	_	_	_	_
B1Y__15554_4	202	_	_	_	_	_	_	_	_	_	_	_
B1Y__15554_5	72	_	_	_	_	_	_	_	_	_	_	_
B1Y__15554_6	151	_	_	_	_	_	_	_	_	_	_	_
B1Y__15554_7	48	_	_	_	_	_	_	_	_	_	_	_
B1Y__15564_1	403	DNA primase	d__Viruses;p__norank;c__norank;o__norank;f__norank;g__norank;s__crAssphage cr271	63.1	_	_	_	_	_	_	_	_
B1Y__15564_2	318	hypothetical protein	d__Viruses;p__norank;c__norank;o__norank;f__norank;g__norank;s__crAssphage cr271	48.3	_	_	_	_	_	_	_	_
B1Y__15572_1	66	_	_	_	_	_	_	_	_	_	_	_
B1Y__15572_2	39	_	_	_	_	_	_	_	_	_	_	_
B1Y__15572_3	193	_	_	_	_	_	_	_	_	_	_	_
B1Y__15572_4	201	_	_	_	_	_	_	_	_	_	_	_
B1Y__15572_5	103	_	_	_	_	_	_	_	_	_	_	_
B1Y__15572_6	318	_	_	_	_	_	_	_	_	_	_	_
B1Y__15572_7	117	_	_	_	_	_	_	_	_	_	_	_
B1Y__15625_1	317	_	_	_	_	_	_	_	_	_	_	_
B1Y__15625_2	65	hypothetical protein	d__Viruses;p__norank;c__norank;o__norank;f__Microviridae;g__norank;s__Microviridae phi-CA82 [ssDNA]	44.4	_	_	_	_	_	_	_	_
B1Y__15625_3	225	_	_	_	_	_	_	_	_	_	K01448	amiABC
B1Y__15625_4	87	_	_	_	_	_	_	_	_	_	_	_
B1Y__15647_1	96	_	_	_	_	_	_	_	_	_	_	_
B1Y__15647_10	47	_	_	_	_	_	_	_	_	_	_	_
B1Y__15647_2	693	hypothetical protein	d__Viruses;p__norank;c__norank;o__norank;f__norank;g__Astrithrvirus;s__Astrithrvirus astrithr [dsDNA]	51.9	_	_	_	GO:0003674;GO:0003824;GO:0003887;GO:0006139;GO:0006259;GO:0006725;GO:0006807;GO:0008150;GO:0008152;GO:0009058;GO:0009059;GO:0009987;GO:0016032;GO:0016740;GO:0016772;GO:0016779;GO:0018130;GO:0019058;GO:0019079;GO:0019438;GO:0034061;GO:0034641;GO:0034645;GO:0034654;GO:0039687;GO:0039693;GO:0043170;GO:0044237;GO:0044238;GO:0044249;GO:0044260;GO:0044271;GO:0044403;GO:0044419;GO:0046483;GO:0051704;GO:…	_	_	_	_
B1Y__15647_3	374	hypothetical protein	d__Viruses;p__norank;c__norank;o__norank;f__norank;g__Astrithrvirus;s__Astrithrvirus astrithr [dsDNA]	61.9	_	_	_	GO:0003674;GO:0003676;GO:0003723;GO:0003824;GO:0005488;GO:0008150;GO:0016032;GO:0016462;GO:0016787;GO:0016817;GO:0016818;GO:0016887;GO:0017111;GO:0019058;GO:0019068;GO:0019072;GO:0019073;GO:0044403;GO:0044419;GO:0051704;GO:0097159;GO:1901363	_	_	_	_
B1Y__15647_4	69	protein of unknown function DUF3310	d__Viruses;p__norank;c__norank;o__norank;f__Siphoviridae;g__norank;s__Clostridium phage phiCP13O [dsDNA]	54.8	_	_	_	_	_	_	_	_
B1Y__15647_5	334	hypothetical protein	d__Viruses;p__norank;c__norank;o__norank;f__norank;g__Astrithrvirus;s__Astrithrvirus astrithr [dsDNA]	42.3	_	_	_	GO:0005575;GO:0008150;GO:0016032;GO:0019012;GO:0019028;GO:0019058;GO:0019068;GO:0019072;GO:0019073;GO:0032991;GO:0044403;GO:0044419;GO:0044423;GO:0046729;GO:0046798;GO:0051704	_	_	_	_
B1Y__15647_6	109	_	_	_	_	_	_	_	_	_	_	_
B1Y__15647_7	227	N-acetylmuramoyl-L-alanine amidase	d__Viruses;p__norank;c__norank;o__norank;f__Siphoviridae;g__norank;s__Clostridium phage phiCD6356 [dsDNA]	28.4	_	_	_	_	COG0860	M	K01448	amiABC
B1Y__15647_8	209	_	_	_	_	_	_	_	_	_	_	_
B1Y__15647_9	387	hypothetical protein	d__Viruses;p__norank;c__norank;o__norank;f__norank;g__Astrithrvirus;s__Astrithrvirus astrithr [dsDNA]	57.6	_	_	_	_	_	_	_	_
B1Y__15665_1	28	_	_	_	_	_	_	_	_	_	_	_
B1Y__15665_2	454	tail sheath family protein (endogenous virus)	d__Viruses;p__norank;c__norank;o__norank;f__Myoviridae;g__norank;s__Clostridium phage phiCT9441A [dsDNA]	36.7	sp|P54331|XKDK_BACSU	Phage-like element PBSX protein XkdK OS=Bacillus subtilis (strain 168) OX=224308 GN=xkdK PE=3 SV=2	31.8	_	_	_	_	_
B1Y__15665_3	150	_	_	_	_	_	_	_	_	_	_	_
B1Y__15665_4	113	HK97 gp10 family protein	d__Viruses;p__norank;c__norank;o__norank;f__norank;g__Abouovirus;s__Abouovirus davies [dsDNA]	39.1	_	_	_	_	_	_	_	_
B1Y__15666_1	285	DNA polymerase	d__Viruses;p__norank;c__norank;o__norank;f__norank;g__norank;s__crAssphage cr271	71.6	_	_	_	_	_	_	_	_
B1Y__15666_2	251	_	_	_	_	_	_	_	_	_	_	_
B1Y__15666_3	197	MAG hypothetical protein	d__Viruses;p__norank;c__norank;o__norank;f__norank;g__norank;s__CrAssphage sp. [dsDNA]	81.1	_	_	_	GO:0003674;GO:0003824;GO:0003887;GO:0004518;GO:0004519;GO:0004521;GO:0004523;GO:0004527;GO:0004540;GO:0005575;GO:0006139;GO:0006259;GO:0006725;GO:0006807;GO:0008150;GO:0008152;GO:0008408;GO:0008409;GO:0009058;GO:0009059;GO:0009987;GO:0016032;GO:0016070;GO:0016740;GO:0016772;GO:0016779;GO:0016787;GO:0016788;GO:0016891;GO:0016893;GO:0018130;GO:0018995;GO:0019058;GO:0019079;GO:0019438;GO:0033643;GO:…	_	_	_	_
B1Y__1566_1	125	_	_	_	_	_	_	_	_	_	_	_
B1Y__1566_10	284	_	_	_	_	_	_	_	_	_	_	_
B1Y__1566_2	72	_	_	_	_	_	_	_	_	_	_	_
B1Y__1566_3	80	_	_	_	_	_	_	_	_	_	_	_
B1Y__1566_4	93	_	_	_	_	_	_	_	_	_	_	_
B1Y__1566_5	64	_	_	_	_	_	_	_	_	_	_	_
B1Y__1566_6	57	_	_	_	_	_	_	_	_	_	_	_
B1Y__1566_7	109	_	_	_	_	_	_	_	_	_	_	_
B1Y__1566_8	90	_	_	_	_	_	_	_	_	_	_	_
B1Y__1566_9	61	_	_	_	_	_	_	_	_	_	_	_
B1Y__15671_1	75	modification methylase	d__Viruses;p__norank;c__norank;o__norank;f__Siphoviridae;g__norank;s__Flavobacterium phage 11b [dsDNA]	50.7	_	_	_	GO:0005575;GO:0019012	_	_	_	_
B1Y__15671_10	1923	_	_	_	_	_	_	_	_	_	_	_
B1Y__15671_2	1033	putative DNA primase/helicase	d__Viruses;p__norank;c__norank;o__norank;f__norank;g__Flaumdravirus;s__Flaumdravirus KIL2 [dsDNA]	33.5	_	_	_	_	_	_	_	_
B1Y__15671_3	165	_	_	_	_	_	_	_	_	_	_	_
B1Y__15671_4	135	_	_	_	_	_	_	_	_	_	_	_
B1Y__15671_5	155	_	_	_	_	_	_	_	_	_	_	_
B1Y__15671_6	108	_	_	_	_	_	_	_	_	_	_	_
B1Y__15671_7	185	_	_	_	_	_	_	_	_	_	_	_
B1Y__15671_8	156	_	_	_	_	_	_	_	_	_	_	_
B1Y__15671_9	187	_	_	_	_	_	_	_	_	_	_	_
B1Y__15672_1	598	major capsid protein VP1	d__Viruses;p__norank;c__norank;o__norank;f__Microviridae;g__norank;s__Microviridae Bog1249	26.3	_	_	_	_	_	_	_	_
B1Y__15672_2	147	_	_	_	_	_	_	_	_	_	_	_
B1Y__15672_3	56	_	_	_	_	_	_	_	_	_	_	_
B1Y__1573_1	296	_	_	_	_	_	_	_	_	_	_	_
B1Y__1573_2	491	RecD/TraA family helicase repair protein	d__Viruses;p__norank;c__norank;o__norank;f__Pithoviridae;g__Pithovirus;s__Pithovirus sibericum [dsDNA]	28.3	_	_	_	_	COG0507	L	_	_
B1Y__1573_3	155	_	_	_	_	_	_	_	_	_	K01159	ruvC
B1Y__15779_1	462	_	_	_	_	_	_	_	_	_	_	_
B1Y__15779_2	218	_	_	_	_	_	_	_	_	_	_	_
B1Y__15779_3	311	_	_	_	_	_	_	_	_	_	_	_
B1Y__15779_4	132	_	_	_	_	_	_	_	_	_	_	_
B1Y__15779_5	117	_	_	_	_	_	_	_	_	_	_	_
B1Y__15779_6	435	_	_	_	_	_	_	_	_	_	_	_
B1Y__15779_7	426	HNH endonuclease	d__Viruses;p__norank;c__norank;o__norank;f__Siphoviridae;g__norank;s__Clostridium phage c-st [dsDNA]	41.2	_	_	_	_	_	_	_	_
B1Y__15779_8	110	_	_	_	_	_	_	_	_	_	_	_
B1Y__15826_1	200	_	_	_	_	_	_	_	_	_	K01447	xlyAB
B1Y__15826_2	93	hypothetical protein	d__Viruses;p__norank;c__norank;o__norank;f__norank;g__Borockvirus;s__Borockvirus brock [dsDNA]	40	_	_	_	_	_	_	_	_
B1Y__15826_3	284	_	_	_	_	_	_	_	_	_	_	_
B1Y__15826_4	517	_	_	_	_	_	_	_	_	_	_	_
B1Y__15839_1	91	_	_	_	_	_	_	_	_	_	_	_
B1Y__15839_10	162	_	_	_	_	_	_	_	_	_	_	_
B1Y__15839_11	116	_	_	_	_	_	_	_	_	_	_	_
B1Y__15839_12	138	_	_	_	_	_	_	_	_	_	_	_
B1Y__15839_13	40	_	_	_	_	_	_	_	_	_	_	_
B1Y__15839_14	184	_	_	_	_	_	_	_	_	_	_	_
B1Y__15839_2	169	_	_	_	_	_	_	_	_	_	_	_
[truncated: 285,707+ more rows]
