# Supplementary material for: Developmental Dynamics of the Gut Virome in Tibetan Pigs at High Altitude: A Metagenomic Perspective across Age Groups
Source: Viruses. 2024 Apr 14;16(4):606. doi: 10.3390/v16040606 (PMC11054254; doi:10.3390/v16040606)
Supplement: Supplementary file 1 [file viruses-16-00606-s001.zip › Supplemental Table S4.xlsx]

## Sheet: final_total
Table S4: Six groups according to change patterns, each group contains contigs
vOUTs	Description1	Description2	unknown_number	unknown_percent	Go_id	gene_id	Group	level
B1Y__12157	cellular_component	host cell part	1347	0.0682	GO:0033643	B1Y__12157_1	group1: disappeard at specific stages	level4
B1Y__12157	cellular_component	host cell	1348	0.0682	GO:0043657	B1Y__12157_1	group1: disappeard at specific stages	level4
B1Y__13850	biological_process	nucleobase-containing compound metabolic process	3510	0.1777	GO:0006139	B1Y__13850_12	group1: disappeard at specific stages	level4
B1Y__13850	biological_process	nucleobase-containing compound metabolic process	3510	0.1777	GO:0006139	B1Y__13850_9	group1: disappeard at specific stages	level4
B1Y__13850	biological_process	cellular aromatic compound metabolic process	3530	0.1787	GO:0006725	B1Y__13850_12	group1: disappeard at specific stages	level4
B1Y__13850	biological_process	cellular aromatic compound metabolic process	3530	0.1787	GO:0006725	B1Y__13850_9	group1: disappeard at specific stages	level4
B1Y__13850	biological_process	phosphorus metabolic process	512	0.0259	GO:0006793	B1Y__13850_12	group1: disappeard at specific stages	level4
B1Y__13850	biological_process	phosphorus metabolic process	512	0.0259	GO:0006793	B1Y__13850_9	group1: disappeard at specific stages	level4
B1Y__13850	biological_process	organophosphate metabolic process	466	0.0236	GO:0019637	B1Y__13850_12	group1: disappeard at specific stages	level4
B1Y__13850	biological_process	organophosphate metabolic process	466	0.0236	GO:0019637	B1Y__13850_9	group1: disappeard at specific stages	level4
B1Y__13850	biological_process	cellular nitrogen compound metabolic process	3572	0.1809	GO:0034641	B1Y__13850_12	group1: disappeard at specific stages	level4
B1Y__13850	biological_process	cellular nitrogen compound metabolic process	3572	0.1809	GO:0034641	B1Y__13850_9	group1: disappeard at specific stages	level4
B1Y__13850	molecular_function	cation binding	645	0.0326	GO:0043169	B1Y__13850_9	group1: disappeard at specific stages	level4
B1Y__13850	biological_process	macromolecule metabolic process	3322	0.1682	GO:0043170	B1Y__13850_9	group1: disappeard at specific stages	level4
B1Y__13850	biological_process	cellular biosynthetic process	2795	0.1415	GO:0044249	B1Y__13850_12	group1: disappeard at specific stages	level4
B1Y__13850	biological_process	cellular biosynthetic process	2795	0.1415	GO:0044249	B1Y__13850_9	group1: disappeard at specific stages	level4
B1Y__13850	biological_process	cellular macromolecule metabolic process	2995	0.1516	GO:0044260	B1Y__13850_9	group1: disappeard at specific stages	level4
B1Y__13850	biological_process	heterocycle metabolic process	3530	0.1787	GO:0046483	B1Y__13850_12	group1: disappeard at specific stages	level4
B1Y__13850	biological_process	heterocycle metabolic process	3530	0.1787	GO:0046483	B1Y__13850_9	group1: disappeard at specific stages	level4
B1Y__13850	biological_process	nucleobase-containing small molecule metabolic process	469	0.0237	GO:0055086	B1Y__13850_12	group1: disappeard at specific stages	level4
B1Y__13850	biological_process	nucleobase-containing small molecule metabolic process	469	0.0237	GO:0055086	B1Y__13850_9	group1: disappeard at specific stages	level4
B1Y__13850	biological_process	carbohydrate derivative metabolic process	537	0.0271	GO:1901135	B1Y__13850_12	group1: disappeard at specific stages	level4
B1Y__13850	biological_process	carbohydrate derivative metabolic process	537	0.0271	GO:1901135	B1Y__13850_9	group1: disappeard at specific stages	level4
B1Y__13850	biological_process	organic cyclic compound metabolic process	3531	0.1788	GO:1901360	B1Y__13850_12	group1: disappeard at specific stages	level4
B1Y__13850	biological_process	organic cyclic compound metabolic process	3531	0.1788	GO:1901360	B1Y__13850_9	group1: disappeard at specific stages	level4
B1Y__13850	biological_process	organic substance biosynthetic process	2795	0.1415	GO:1901576	B1Y__13850_12	group1: disappeard at specific stages	level4
B1Y__13850	biological_process	organic substance biosynthetic process	2795	0.1415	GO:1901576	B1Y__13850_9	group1: disappeard at specific stages	level4
B1Y__13850	cellular_component	oxidoreductase complex	70	0.0035	GO:1990204	B1Y__13850_12	group1: disappeard at specific stages	level4
B1Y__13850	cellular_component	oxidoreductase complex	70	0.0035	GO:1990204	B1Y__13850_9	group1: disappeard at specific stages	level4
B1Y__15666	molecular_function	ribonuclease activity	301	0.0152	GO:0004540	B1Y__15666_3	group1: disappeard at specific stages	level4
B1Y__15666	biological_process	nucleobase-containing compound metabolic process	3510	0.1777	GO:0006139	B1Y__15666_3	group1: disappeard at specific stages	level4
B1Y__15666	biological_process	cellular aromatic compound metabolic process	3530	0.1787	GO:0006725	B1Y__15666_3	group1: disappeard at specific stages	level4
B1Y__15666	biological_process	viral process	4311	0.2183	GO:0016032	B1Y__15666_3	group1: disappeard at specific stages	level4
B1Y__15666	molecular_function	transferase activity, transferring phosphorus-containing groups	1843	0.0933	GO:0016772	B1Y__15666_3	group1: disappeard at specific stages	level4
B1Y__15666	molecular_function	hydrolase activity, acting on ester bonds	1071	0.0542	GO:0016788	B1Y__15666_3	group1: disappeard at specific stages	level4
B1Y__15666	cellular_component	host cell part	1347	0.0682	GO:0033643	B1Y__15666_3	group1: disappeard at specific stages	level4
B1Y__15666	molecular_function	DNA polymerase activity	1699	0.086	GO:0034061	B1Y__15666_3	group1: disappeard at specific stages	level4
B1Y__15666	biological_process	cellular nitrogen compound metabolic process	3572	0.1809	GO:0034641	B1Y__15666_3	group1: disappeard at specific stages	level4
B1Y__15666	biological_process	macromolecule metabolic process	3322	0.1682	GO:0043170	B1Y__15666_3	group1: disappeard at specific stages	level4
B1Y__15666	cellular_component	host cell	1348	0.0682	GO:0043657	B1Y__15666_3	group1: disappeard at specific stages	level4
B1Y__15666	biological_process	cellular biosynthetic process	2795	0.1415	GO:0044249	B1Y__15666_3	group1: disappeard at specific stages	level4
B1Y__15666	biological_process	cellular macromolecule metabolic process	2995	0.1516	GO:0044260	B1Y__15666_3	group1: disappeard at specific stages	level4
B1Y__15666	biological_process	heterocycle metabolic process	3530	0.1787	GO:0046483	B1Y__15666_3	group1: disappeard at specific stages	level4
B1Y__15666	biological_process	organic cyclic compound metabolic process	3531	0.1788	GO:1901360	B1Y__15666_3	group1: disappeard at specific stages	level4
B1Y__15666	biological_process	organic substance biosynthetic process	2795	0.1415	GO:1901576	B1Y__15666_3	group1: disappeard at specific stages	level4
B1Y__15666	biological_process	response to salt	222	0.0112	GO:1902074	B1Y__15666_3	group1: disappeard at specific stages	level4
B1Y__16548	biological_process	nucleobase-containing compound metabolic process	3510	0.1777	GO:0006139	B1Y__16548_1	group1: disappeard at specific stages	level4
B1Y__16548	biological_process	cellular aromatic compound metabolic process	3530	0.1787	GO:0006725	B1Y__16548_1	group1: disappeard at specific stages	level4
B1Y__16548	biological_process	viral process	4311	0.2183	GO:0016032	B1Y__16548_1	group1: disappeard at specific stages	level4
B1Y__16548	molecular_function	transferase activity, transferring phosphorus-containing groups	1843	0.0933	GO:0016772	B1Y__16548_1	group1: disappeard at specific stages	level4
B1Y__16548	molecular_function	DNA polymerase activity	1699	0.086	GO:0034061	B1Y__16548_1	group1: disappeard at specific stages	level4
B1Y__16548	biological_process	cellular nitrogen compound metabolic process	3572	0.1809	GO:0034641	B1Y__16548_1	group1: disappeard at specific stages	level4
B1Y__16548	biological_process	macromolecule metabolic process	3322	0.1682	GO:0043170	B1Y__16548_1	group1: disappeard at specific stages	level4
B1Y__16548	biological_process	cellular biosynthetic process	2795	0.1415	GO:0044249	B1Y__16548_1	group1: disappeard at specific stages	level4
B1Y__16548	biological_process	cellular macromolecule metabolic process	2995	0.1516	GO:0044260	B1Y__16548_1	group1: disappeard at specific stages	level4
B1Y__16548	biological_process	heterocycle metabolic process	3530	0.1787	GO:0046483	B1Y__16548_1	group1: disappeard at specific stages	level4
B1Y__16548	biological_process	organic cyclic compound metabolic process	3531	0.1788	GO:1901360	B1Y__16548_1	group1: disappeard at specific stages	level4
B1Y__16548	biological_process	organic substance biosynthetic process	2795	0.1415	GO:1901576	B1Y__16548_1	group1: disappeard at specific stages	level4
B1Y__20416	cellular_component	icosahedral viral capsid	296	0.0149	GO:0019030	B1Y__20416_8	group1: disappeard at specific stages	level4
B1Y__2096	molecular_function	DNA-binding transcription factor activity, RNA polymerase II-specific	170	0.0086	GO:0000981	B1Y__2096_2	group1: disappeard at specific stages	level4
B1Y__2096	molecular_function	DNA-binding transcription repressor activity	170	0.0086	GO:0001217	B1Y__2096_2	group1: disappeard at specific stages	level4
B1Y__2096	molecular_function	nucleic acid binding	1291	0.0653	GO:0003676	B1Y__2096_2	group1: disappeard at specific stages	level4
B1Y__2096	biological_process	nucleobase-containing compound metabolic process	3510	0.1777	GO:0006139	B1Y__2096_2	group1: disappeard at specific stages	level4
B1Y__2096	biological_process	cellular aromatic compound metabolic process	3530	0.1787	GO:0006725	B1Y__2096_2	group1: disappeard at specific stages	level4
B1Y__2096	biological_process	response to inorganic substance	243	0.0123	GO:0010035	B1Y__2096_2	group1: disappeard at specific stages	level4
B1Y__2096	molecular_function	hydrolase activity, acting on ester bonds	1071	0.0542	GO:0016788	B1Y__2096_2	group1: disappeard at specific stages	level4
B1Y__2096	cellular_component	transcription repressor complex	170	0.0086	GO:0017053	B1Y__2096_2	group1: disappeard at specific stages	level4
B1Y__2096	biological_process	regulation of metabolic process	467	0.0236	GO:0019222	B1Y__2096_2	group1: disappeard at specific stages	level4
B1Y__2096	biological_process	cellular nitrogen compound metabolic process	3572	0.1809	GO:0034641	B1Y__2096_2	group1: disappeard at specific stages	level4
B1Y__2096	molecular_function	cation binding	645	0.0326	GO:0043169	B1Y__2096_2	group1: disappeard at specific stages	level4
B1Y__2096	biological_process	macromolecule metabolic process	3322	0.1682	GO:0043170	B1Y__2096_2	group1: disappeard at specific stages	level4
B1Y__2096	biological_process	heterocycle metabolic process	3530	0.1787	GO:0046483	B1Y__2096_2	group1: disappeard at specific stages	level4
B1Y__2096	biological_process	negative regulation of biological process	554	0.028	GO:0048519	B1Y__2096_2	group1: disappeard at specific stages	level4
B1Y__2096	biological_process	regulation of cellular process	768	0.0388	GO:0050794	B1Y__2096_2	group1: disappeard at specific stages	level4
B1Y__2096	biological_process	cellular response to chemical stimulus	264	0.0133	GO:0070887	B1Y__2096_2	group1: disappeard at specific stages	level4
B1Y__2096	biological_process	organic cyclic compound metabolic process	3531	0.1788	GO:1901360	B1Y__2096_2	group1: disappeard at specific stages	level4
B1Y__22697	molecular_function	nucleic acid binding	1291	0.0653	GO:0003676	B1Y__22697_2	group1: disappeard at specific stages	level4
B1Y__22697	molecular_function	nucleic acid binding	1291	0.0653	GO:0003676	B1Y__22697_3	group1: disappeard at specific stages	level4
B1Y__22697	biological_process	nucleobase-containing compound metabolic process	3510	0.1777	GO:0006139	B1Y__22697_1	group1: disappeard at specific stages	level4
B1Y__22697	biological_process	cellular aromatic compound metabolic process	3530	0.1787	GO:0006725	B1Y__22697_1	group1: disappeard at specific stages	level4
B1Y__22697	biological_process	viral process	4311	0.2183	GO:0016032	B1Y__22697_1	group1: disappeard at specific stages	level4
B1Y__22697	biological_process	viral process	4311	0.2183	GO:0016032	B1Y__22697_2	group1: disappeard at specific stages	level4
B1Y__22697	biological_process	viral process	4311	0.2183	GO:0016032	B1Y__22697_3	group1: disappeard at specific stages	level4
B1Y__22697	molecular_function	transferase activity, transferring phosphorus-containing groups	1843	0.0933	GO:0016772	B1Y__22697_1	group1: disappeard at specific stages	level4
B1Y__22697	molecular_function	hydrolase activity, acting on acid anhydrides	1713	0.0867	GO:0016817	B1Y__22697_2	group1: disappeard at specific stages	level4
B1Y__22697	molecular_function	hydrolase activity, acting on acid anhydrides	1713	0.0867	GO:0016817	B1Y__22697_3	group1: disappeard at specific stages	level4
B1Y__22697	molecular_function	DNA polymerase activity	1699	0.086	GO:0034061	B1Y__22697_1	group1: disappeard at specific stages	level4
B1Y__22697	biological_process	cellular nitrogen compound metabolic process	3572	0.1809	GO:0034641	B1Y__22697_1	group1: disappeard at specific stages	level4
B1Y__22697	biological_process	macromolecule metabolic process	3322	0.1682	GO:0043170	B1Y__22697_1	group1: disappeard at specific stages	level4
B1Y__22697	biological_process	cellular biosynthetic process	2795	0.1415	GO:0044249	B1Y__22697_1	group1: disappeard at specific stages	level4
B1Y__22697	biological_process	cellular macromolecule metabolic process	2995	0.1516	GO:0044260	B1Y__22697_1	group1: disappeard at specific stages	level4
B1Y__22697	biological_process	heterocycle metabolic process	3530	0.1787	GO:0046483	B1Y__22697_1	group1: disappeard at specific stages	level4
B1Y__22697	biological_process	organic cyclic compound metabolic process	3531	0.1788	GO:1901360	B1Y__22697_1	group1: disappeard at specific stages	level4
B1Y__22697	biological_process	organic substance biosynthetic process	2795	0.1415	GO:1901576	B1Y__22697_1	group1: disappeard at specific stages	level4
B1Y__22815	biological_process	nucleobase-containing compound metabolic process	3510	0.1777	GO:0006139	B1Y__22815_1	group1: disappeard at specific stages	level4
B1Y__22815	biological_process	chromatin silencing	10	0.0005	GO:0006342	B1Y__22815_1	group1: disappeard at specific stages	level4
B1Y__22815	biological_process	cellular aromatic compound metabolic process	3530	0.1787	GO:0006725	B1Y__22815_1	group1: disappeard at specific stages	level4
B1Y__22815	biological_process	phosphorus metabolic process	512	0.0259	GO:0006793	B1Y__22815_1	group1: disappeard at specific stages	level4
B1Y__22815	biological_process	cell aging	7	0.0003	GO:0007569	B1Y__22815_1	group1: disappeard at specific stages	level4
B1Y__22815	biological_process	response to temperature stimulus	140	0.007	GO:0009266	B1Y__22815_1	group1: disappeard at specific stages	level4
B1Y__22815	biological_process	response to heat	99	0.005	GO:0009408	B1Y__22815_1	group1: disappeard at specific stages	level4
B1Y__22815	biological_process	cellular component organization	509	0.0257	GO:0016043	B1Y__22815_1	group1: disappeard at specific stages	level4
B1Y__22815	molecular_function	ligase activity, forming carbon-nitrogen bonds	14	0.0007	GO:0016879	B1Y__22815_1	group1: disappeard at specific stages	level4
B1Y__22815	biological_process	regulation of metabolic process	467	0.0236	GO:0019222	B1Y__22815_1	group1: disappeard at specific stages	level4
B1Y__22815	biological_process	organophosphate metabolic process	466	0.0236	GO:0019637	B1Y__22815_1	group1: disappeard at specific stages	level4
B1Y__22815	biological_process	cellular nitrogen compound metabolic process	3572	0.1809	GO:0034641	B1Y__22815_1	group1: disappeard at specific stages	level4
B1Y__22815	biological_process	cellular metabolic compound salvage	11	0.0005	GO:0043094	B1Y__22815_1	group1: disappeard at specific stages	level4
B1Y__22815	cellular_component	membrane-bounded organelle	254	0.0128	GO:0043227	B1Y__22815_1	group1: disappeard at specific stages	level4
B1Y__22815	cellular_component	intracellular organelle	246	0.0124	GO:0043229	B1Y__22815_1	group1: disappeard at specific stages	level4
B1Y__22815	biological_process	cellular biosynthetic process	2795	0.1415	GO:0044249	B1Y__22815_1	group1: disappeard at specific stages	level4
B1Y__22815	biological_process	heterocycle metabolic process	3530	0.1787	GO:0046483	B1Y__22815_1	group1: disappeard at specific stages	level4
B1Y__22815	biological_process	negative regulation of biological process	554	0.028	GO:0048519	B1Y__22815_1	group1: disappeard at specific stages	level4
B1Y__22815	biological_process	regulation of cellular process	768	0.0388	GO:0050794	B1Y__22815_1	group1: disappeard at specific stages	level4
B1Y__22815	biological_process	nucleobase-containing small molecule metabolic process	469	0.0237	GO:0055086	B1Y__22815_1	group1: disappeard at specific stages	level4
B1Y__22815	biological_process	organic cyclic compound metabolic process	3531	0.1788	GO:1901360	B1Y__22815_1	group1: disappeard at specific stages	level4
B1Y__22815	biological_process	organonitrogen compound metabolic process	671	0.0339	GO:1901564	B1Y__22815_1	group1: disappeard at specific stages	level4
B1Y__22815	biological_process	organic substance biosynthetic process	2795	0.1415	GO:1901576	B1Y__22815_1	group1: disappeard at specific stages	level4
B1Y__23761	molecular_function	nucleic acid binding	1291	0.0653	GO:0003676	B1Y__23761_1	group1: disappeard at specific stages	level4
B1Y__23761	biological_process	nucleobase-containing compound metabolic process	3510	0.1777	GO:0006139	B1Y__23761_1	group1: disappeard at specific stages	level4
B1Y__23761	biological_process	cellular aromatic compound metabolic process	3530	0.1787	GO:0006725	B1Y__23761_1	group1: disappeard at specific stages	level4
B1Y__23761	molecular_function	enzyme activator activity	31	0.0015	GO:0008047	B1Y__23761_1	group1: disappeard at specific stages	level4
B1Y__23761	biological_process	response to extracellular stimulus	58	0.0029	GO:0009991	B1Y__23761_1	group1: disappeard at specific stages	level4
B1Y__23761	biological_process	cellular response to extracellular stimulus	45	0.0022	GO:0031668	B1Y__23761_1	group1: disappeard at specific stages	level4
B1Y__23761	biological_process	cellular response to stress	530	0.0268	GO:0033554	B1Y__23761_1	group1: disappeard at specific stages	level4
B1Y__23761	biological_process	cellular nitrogen compound metabolic process	3572	0.1809	GO:0034641	B1Y__23761_1	group1: disappeard at specific stages	level4
B1Y__23761	molecular_function	identical protein binding	443	0.0224	GO:0042802	B1Y__23761_1	group1: disappeard at specific stages	level4
B1Y__23761	biological_process	macromolecule metabolic process	3322	0.1682	GO:0043170	B1Y__23761_1	group1: disappeard at specific stages	level4
B1Y__23761	biological_process	positive regulation of molecular function	57	0.0028	GO:0044093	B1Y__23761_1	group1: disappeard at specific stages	level4
B1Y__23761	biological_process	cellular biosynthetic process	2795	0.1415	GO:0044249	B1Y__23761_1	group1: disappeard at specific stages	level4
B1Y__23761	biological_process	cellular macromolecule metabolic process	2995	0.1516	GO:0044260	B1Y__23761_1	group1: disappeard at specific stages	level4
B1Y__23761	biological_process	heterocycle metabolic process	3530	0.1787	GO:0046483	B1Y__23761_1	group1: disappeard at specific stages	level4
B1Y__23761	biological_process	regulation of catalytic activity	64	0.0032	GO:0050790	B1Y__23761_1	group1: disappeard at specific stages	level4
B1Y__23761	biological_process	cellular response to external stimulus	46	0.0023	GO:0071496	B1Y__23761_1	group1: disappeard at specific stages	level4
B1Y__23761	biological_process	organic cyclic compound metabolic process	3531	0.1788	GO:1901360	B1Y__23761_1	group1: disappeard at specific stages	level4
B1Y__23761	biological_process	organic substance biosynthetic process	2795	0.1415	GO:1901576	B1Y__23761_1	group1: disappeard at specific stages	level4
B1Y__26947	biological_process	nucleobase-containing compound metabolic process	3510	0.1777	GO:0006139	B1Y__26947_1	group1: disappeard at specific stages	level4
B1Y__26947	biological_process	cellular aromatic compound metabolic process	3530	0.1787	GO:0006725	B1Y__26947_1	group1: disappeard at specific stages	level4
B1Y__26947	biological_process	viral process	4311	0.2183	GO:0016032	B1Y__26947_1	group1: disappeard at specific stages	level4
B1Y__26947	molecular_function	transferase activity, transferring phosphorus-containing groups	1843	0.0933	GO:0016772	B1Y__26947_1	group1: disappeard at specific stages	level4
B1Y__26947	molecular_function	DNA polymerase activity	1699	0.086	GO:0034061	B1Y__26947_1	group1: disappeard at specific stages	level4
B1Y__26947	biological_process	cellular nitrogen compound metabolic process	3572	0.1809	GO:0034641	B1Y__26947_1	group1: disappeard at specific stages	level4
B1Y__26947	biological_process	macromolecule metabolic process	3322	0.1682	GO:0043170	B1Y__26947_1	group1: disappeard at specific stages	level4
B1Y__26947	biological_process	cellular biosynthetic process	2795	0.1415	GO:0044249	B1Y__26947_1	group1: disappeard at specific stages	level4
B1Y__26947	biological_process	cellular macromolecule metabolic process	2995	0.1516	GO:0044260	B1Y__26947_1	group1: disappeard at specific stages	level4
B1Y__26947	biological_process	heterocycle metabolic process	3530	0.1787	GO:0046483	B1Y__26947_1	group1: disappeard at specific stages	level4
B1Y__26947	biological_process	organic cyclic compound metabolic process	3531	0.1788	GO:1901360	B1Y__26947_1	group1: disappeard at specific stages	level4
B1Y__26947	biological_process	organic substance biosynthetic process	2795	0.1415	GO:1901576	B1Y__26947_1	group1: disappeard at specific stages	level4
B1Y__27770	biological_process	nucleobase-containing compound metabolic process	3510	0.1777	GO:0006139	B1Y__27770_7	group1: disappeard at specific stages	level4
B1Y__27770	biological_process	cellular aromatic compound metabolic process	3530	0.1787	GO:0006725	B1Y__27770_7	group1: disappeard at specific stages	level4
B1Y__27770	biological_process	response to temperature stimulus	140	0.007	GO:0009266	B1Y__27770_7	group1: disappeard at specific stages	level4
B1Y__27770	biological_process	response to heat	99	0.005	GO:0009408	B1Y__27770_7	group1: disappeard at specific stages	level4
B1Y__27770	biological_process	regulation of metabolic process	467	0.0236	GO:0019222	B1Y__27770_7	group1: disappeard at specific stages	level4
B1Y__27770	biological_process	cellular nitrogen compound metabolic process	3572	0.1809	GO:0034641	B1Y__27770_7	group1: disappeard at specific stages	level4
B1Y__27770	biological_process	macromolecule metabolic process	3322	0.1682	GO:0043170	B1Y__27770_7	group1: disappeard at specific stages	level4
B1Y__27770	biological_process	cellular biosynthetic process	2795	0.1415	GO:0044249	B1Y__27770_7	group1: disappeard at specific stages	level4
B1Y__27770	biological_process	cellular macromolecule metabolic process	2995	0.1516	GO:0044260	B1Y__27770_7	group1: disappeard at specific stages	level4
B1Y__27770	biological_process	heterocycle metabolic process	3530	0.1787	GO:0046483	B1Y__27770_7	group1: disappeard at specific stages	level4
B1Y__27770	biological_process	regulation of cellular process	768	0.0388	GO:0050794	B1Y__27770_7	group1: disappeard at specific stages	level4
B1Y__27770	biological_process	organic cyclic compound metabolic process	3531	0.1788	GO:1901360	B1Y__27770_7	group1: disappeard at specific stages	level4
B1Y__27770	biological_process	organic substance biosynthetic process	2795	0.1415	GO:1901576	B1Y__27770_7	group1: disappeard at specific stages	level4
B1Y__28003	molecular_function	identical protein binding	443	0.0224	GO:0042802	B1Y__28003_3	group1: disappeard at specific stages	level4
B1Y__28003	biological_process	interaction with host	589	0.0298	GO:0051701	B1Y__28003_14	group1: disappeard at specific stages	level4
B1Y__30238	biological_process	nucleobase-containing compound metabolic process	3510	0.1777	GO:0006139	B1Y__30238_6	group1: disappeard at specific stages	level4
B1Y__30238	biological_process	cellular aromatic compound metabolic process	3530	0.1787	GO:0006725	B1Y__30238_6	group1: disappeard at specific stages	level4
B1Y__30238	biological_process	phosphorus metabolic process	512	0.0259	GO:0006793	B1Y__30238_6	group1: disappeard at specific stages	level4
B1Y__30238	biological_process	organophosphate metabolic process	466	0.0236	GO:0019637	B1Y__30238_6	group1: disappeard at specific stages	level4
B1Y__30238	biological_process	cellular nitrogen compound metabolic process	3572	0.1809	GO:0034641	B1Y__30238_6	group1: disappeard at specific stages	level4
B1Y__30238	molecular_function	cation binding	645	0.0326	GO:0043169	B1Y__30238_6	group1: disappeard at specific stages	level4
B1Y__30238	biological_process	macromolecule metabolic process	3322	0.1682	GO:0043170	B1Y__30238_6	group1: disappeard at specific stages	level4
B1Y__30238	biological_process	cellular biosynthetic process	2795	0.1415	GO:0044249	B1Y__30238_6	group1: disappeard at specific stages	level4
B1Y__30238	biological_process	cellular macromolecule metabolic process	2995	0.1516	GO:0044260	B1Y__30238_6	group1: disappeard at specific stages	level4
B1Y__30238	biological_process	heterocycle metabolic process	3530	0.1787	GO:0046483	B1Y__30238_6	group1: disappeard at specific stages	level4
B1Y__30238	biological_process	nucleobase-containing small molecule metabolic process	469	0.0237	GO:0055086	B1Y__30238_6	group1: disappeard at specific stages	level4
B1Y__30238	biological_process	carbohydrate derivative metabolic process	537	0.0271	GO:1901135	B1Y__30238_6	group1: disappeard at specific stages	level4
B1Y__30238	biological_process	organic cyclic compound metabolic process	3531	0.1788	GO:1901360	B1Y__30238_6	group1: disappeard at specific stages	level4
B1Y__30238	biological_process	organic substance biosynthetic process	2795	0.1415	GO:1901576	B1Y__30238_6	group1: disappeard at specific stages	level4
B1Y__30238	cellular_component	oxidoreductase complex	70	0.0035	GO:1990204	B1Y__30238_6	group1: disappeard at specific stages	level4
B1Y__31410	molecular_function	nucleic acid binding	1291	0.0653	GO:0003676	B1Y__31410_3	group1: disappeard at specific stages	level4
B1Y__31410	biological_process	nucleobase-containing compound metabolic process	3510	0.1777	GO:0006139	B1Y__31410_4	group1: disappeard at specific stages	level4
B1Y__31410	biological_process	cellular aromatic compound metabolic process	3530	0.1787	GO:0006725	B1Y__31410_4	group1: disappeard at specific stages	level4
B1Y__31410	biological_process	viral process	4311	0.2183	GO:0016032	B1Y__31410_1	group1: disappeard at specific stages	level4
B1Y__31410	biological_process	viral process	4311	0.2183	GO:0016032	B1Y__31410_3	group1: disappeard at specific stages	level4
B1Y__31410	biological_process	viral process	4311	0.2183	GO:0016032	B1Y__31410_4	group1: disappeard at specific stages	level4
B1Y__31410	molecular_function	transferase activity, transferring phosphorus-containing groups	1843	0.0933	GO:0016772	B1Y__31410_4	group1: disappeard at specific stages	level4
B1Y__31410	molecular_function	hydrolase activity, acting on acid anhydrides	1713	0.0867	GO:0016817	B1Y__31410_3	group1: disappeard at specific stages	level4
B1Y__31410	molecular_function	DNA polymerase activity	1699	0.086	GO:0034061	B1Y__31410_4	group1: disappeard at specific stages	level4
B1Y__31410	biological_process	cellular nitrogen compound metabolic process	3572	0.1809	GO:0034641	B1Y__31410_4	group1: disappeard at specific stages	level4
B1Y__31410	biological_process	macromolecule metabolic process	3322	0.1682	GO:0043170	B1Y__31410_4	group1: disappeard at specific stages	level4
B1Y__31410	biological_process	cellular biosynthetic process	2795	0.1415	GO:0044249	B1Y__31410_4	group1: disappeard at specific stages	level4
B1Y__31410	biological_process	cellular macromolecule metabolic process	2995	0.1516	GO:0044260	B1Y__31410_4	group1: disappeard at specific stages	level4
B1Y__31410	biological_process	heterocycle metabolic process	3530	0.1787	GO:0046483	B1Y__31410_4	group1: disappeard at specific stages	level4
B1Y__31410	biological_process	organic cyclic compound metabolic process	3531	0.1788	GO:1901360	B1Y__31410_4	group1: disappeard at specific stages	level4
B1Y__31410	biological_process	organic substance biosynthetic process	2795	0.1415	GO:1901576	B1Y__31410_4	group1: disappeard at specific stages	level4
B1Y__3379	biological_process	nucleobase-containing compound metabolic process	3510	0.1777	GO:0006139	B1Y__3379_3	group1: disappeard at specific stages	level4
B1Y__3379	biological_process	cellular aromatic compound metabolic process	3530	0.1787	GO:0006725	B1Y__3379_3	group1: disappeard at specific stages	level4
B1Y__3379	molecular_function	transferase activity, transferring phosphorus-containing groups	1843	0.0933	GO:0016772	B1Y__3379_3	group1: disappeard at specific stages	level4
B1Y__3379	molecular_function	hydrolase activity, acting on ester bonds	1071	0.0542	GO:0016788	B1Y__3379_3	group1: disappeard at specific stages	level4
B1Y__3379	molecular_function	DNA polymerase activity	1699	0.086	GO:0034061	B1Y__3379_3	group1: disappeard at specific stages	level4
B1Y__3379	biological_process	cellular nitrogen compound metabolic process	3572	0.1809	GO:0034641	B1Y__3379_3	group1: disappeard at specific stages	level4
B1Y__3379	biological_process	macromolecule metabolic process	3322	0.1682	GO:0043170	B1Y__3379_3	group1: disappeard at specific stages	level4
B1Y__3379	biological_process	cellular biosynthetic process	2795	0.1415	GO:0044249	B1Y__3379_3	group1: disappeard at specific stages	level4
B1Y__3379	biological_process	cellular macromolecule metabolic process	2995	0.1516	GO:0044260	B1Y__3379_3	group1: disappeard at specific stages	level4
B1Y__3379	biological_process	heterocycle metabolic process	3530	0.1787	GO:0046483	B1Y__3379_3	group1: disappeard at specific stages	level4
B1Y__3379	biological_process	organic cyclic compound metabolic process	3531	0.1788	GO:1901360	B1Y__3379_3	group1: disappeard at specific stages	level4
B1Y__3379	biological_process	organic substance biosynthetic process	2795	0.1415	GO:1901576	B1Y__3379_3	group1: disappeard at specific stages	level4
B1Y__34681	biological_process	nucleobase-containing compound metabolic process	3510	0.1777	GO:0006139	B1Y__34681_3	group1: disappeard at specific stages	level4
B1Y__34681	biological_process	cellular aromatic compound metabolic process	3530	0.1787	GO:0006725	B1Y__34681_3	group1: disappeard at specific stages	level4
B1Y__34681	biological_process	viral process	4311	0.2183	GO:0016032	B1Y__34681_3	group1: disappeard at specific stages	level4
B1Y__34681	molecular_function	transferase activity, transferring phosphorus-containing groups	1843	0.0933	GO:0016772	B1Y__34681_3	group1: disappeard at specific stages	level4
B1Y__34681	molecular_function	DNA polymerase activity	1699	0.086	GO:0034061	B1Y__34681_3	group1: disappeard at specific stages	level4
B1Y__34681	biological_process	cellular nitrogen compound metabolic process	3572	0.1809	GO:0034641	B1Y__34681_3	group1: disappeard at specific stages	level4
B1Y__34681	biological_process	macromolecule metabolic process	3322	0.1682	GO:0043170	B1Y__34681_3	group1: disappeard at specific stages	level4
B1Y__34681	biological_process	cellular biosynthetic process	2795	0.1415	GO:0044249	B1Y__34681_3	group1: disappeard at specific stages	level4
B1Y__34681	biological_process	cellular macromolecule metabolic process	2995	0.1516	GO:0044260	B1Y__34681_3	group1: disappeard at specific stages	level4
B1Y__34681	biological_process	heterocycle metabolic process	3530	0.1787	GO:0046483	B1Y__34681_3	group1: disappeard at specific stages	level4
B1Y__34681	biological_process	organic cyclic compound metabolic process	3531	0.1788	GO:1901360	B1Y__34681_3	group1: disappeard at specific stages	level4
B1Y__34681	biological_process	organic substance biosynthetic process	2795	0.1415	GO:1901576	B1Y__34681_3	group1: disappeard at specific stages	level4
B1Y__34825	biological_process	viral process	4311	0.2183	GO:0016032	B1Y__34825_1	group1: disappeard at specific stages	level4
B1Y__35010	cellular_component	host cell part	1347	0.0682	GO:0033643	B1Y__35010_4	group1: disappeard at specific stages	level4
B1Y__35010	cellular_component	host cell	1348	0.0682	GO:0043657	B1Y__35010_4	group1: disappeard at specific stages	level4
B1Y__36620	biological_process	nucleobase-containing compound metabolic process	3510	0.1777	GO:0006139	B1Y__36620_7	group1: disappeard at specific stages	level4
B1Y__36620	biological_process	cellular aromatic compound metabolic process	3530	0.1787	GO:0006725	B1Y__36620_7	group1: disappeard at specific stages	level4
B1Y__36620	biological_process	cellular nitrogen compound metabolic process	3572	0.1809	GO:0034641	B1Y__36620_7	group1: disappeard at specific stages	level4
B1Y__36620	biological_process	macromolecule metabolic process	3322	0.1682	GO:0043170	B1Y__36620_7	group1: disappeard at specific stages	level4
B1Y__36620	biological_process	cellular macromolecule metabolic process	2995	0.1516	GO:0044260	B1Y__36620_7	group1: disappeard at specific stages	level4
B1Y__36620	biological_process	heterocycle metabolic process	3530	0.1787	GO:0046483	B1Y__36620_7	group1: disappeard at specific stages	level4
B1Y__36620	biological_process	organic cyclic compound metabolic process	3531	0.1788	GO:1901360	B1Y__36620_7	group1: disappeard at specific stages	level4
B1Y__36634	molecular_function	nucleic acid binding	1291	0.0653	GO:0003676	B1Y__36634_1	group1: disappeard at specific stages	level4
B1Y__36634	biological_process	viral process	4311	0.2183	GO:0016032	B1Y__36634_1	group1: disappeard at specific stages	level4
B1Y__36634	molecular_function	hydrolase activity, acting on acid anhydrides	1713	0.0867	GO:0016817	B1Y__36634_1	group1: disappeard at specific stages	level4
B1Y__37113	molecular_function	nucleic acid binding	1291	0.0653	GO:0003676	B1Y__37113_2	group1: disappeard at specific stages	level4
B1Y__37113	biological_process	viral process	4311	0.2183	GO:0016032	B1Y__37113_2	group1: disappeard at specific stages	level4
B1Y__37113	molecular_function	hydrolase activity, acting on acid anhydrides	1713	0.0867	GO:0016817	B1Y__37113_2	group1: disappeard at specific stages	level4
B1Y__40551	biological_process	nucleobase-containing compound metabolic process	3510	0.1777	GO:0006139	B1Y__40551_6	group1: disappeard at specific stages	level4
B1Y__40551	biological_process	cellular aromatic compound metabolic process	3530	0.1787	GO:0006725	B1Y__40551_6	group1: disappeard at specific stages	level4
B1Y__40551	biological_process	cellular nitrogen compound metabolic process	3572	0.1809	GO:0034641	B1Y__40551_6	group1: disappeard at specific stages	level4
B1Y__40551	biological_process	macromolecule metabolic process	3322	0.1682	GO:0043170	B1Y__40551_6	group1: disappeard at specific stages	level4
B1Y__40551	biological_process	cellular macromolecule metabolic process	2995	0.1516	GO:0044260	B1Y__40551_6	group1: disappeard at specific stages	level4
B1Y__40551	biological_process	heterocycle metabolic process	3530	0.1787	GO:0046483	B1Y__40551_6	group1: disappeard at specific stages	level4
B1Y__40551	biological_process	organic cyclic compound metabolic process	3531	0.1788	GO:1901360	B1Y__40551_6	group1: disappeard at specific stages	level4
B1Y__43672	biological_process	nucleobase-containing compound metabolic process	3510	0.1777	GO:0006139	B1Y__43672_1	group1: disappeard at specific stages	level4
B1Y__43672	biological_process	nucleobase-containing compound metabolic process	3510	0.1777	GO:0006139	B1Y__43672_2	group1: disappeard at specific stages	level4
B1Y__43672	biological_process	cellular aromatic compound metabolic process	3530	0.1787	GO:0006725	B1Y__43672_1	group1: disappeard at specific stages	level4
B1Y__43672	biological_process	cellular aromatic compound metabolic process	3530	0.1787	GO:0006725	B1Y__43672_2	group1: disappeard at specific stages	level4
B1Y__43672	molecular_function	transferase activity, transferring phosphorus-containing groups	1843	0.0933	GO:0016772	B1Y__43672_1	group1: disappeard at specific stages	level4
B1Y__43672	molecular_function	transferase activity, transferring phosphorus-containing groups	1843	0.0933	GO:0016772	B1Y__43672_2	group1: disappeard at specific stages	level4
B1Y__43672	molecular_function	hydrolase activity, acting on ester bonds	1071	0.0542	GO:0016788	B1Y__43672_1	group1: disappeard at specific stages	level4
B1Y__43672	molecular_function	hydrolase activity, acting on ester bonds	1071	0.0542	GO:0016788	B1Y__43672_2	group1: disappeard at specific stages	level4
B1Y__43672	molecular_function	DNA polymerase activity	1699	0.086	GO:0034061	B1Y__43672_1	group1: disappeard at specific stages	level4
B1Y__43672	molecular_function	DNA polymerase activity	1699	0.086	GO:0034061	B1Y__43672_2	group1: disappeard at specific stages	level4
B1Y__43672	biological_process	cellular nitrogen compound metabolic process	3572	0.1809	GO:0034641	B1Y__43672_1	group1: disappeard at specific stages	level4
B1Y__43672	biological_process	cellular nitrogen compound metabolic process	3572	0.1809	GO:0034641	B1Y__43672_2	group1: disappeard at specific stages	level4
B1Y__43672	biological_process	macromolecule metabolic process	3322	0.1682	GO:0043170	B1Y__43672_1	group1: disappeard at specific stages	level4
B1Y__43672	biological_process	macromolecule metabolic process	3322	0.1682	GO:0043170	B1Y__43672_2	group1: disappeard at specific stages	level4
B1Y__43672	biological_process	cellular biosynthetic process	2795	0.1415	GO:0044249	B1Y__43672_1	group1: disappeard at specific stages	level4
B1Y__43672	biological_process	cellular biosynthetic process	2795	0.1415	GO:0044249	B1Y__43672_2	group1: disappeard at specific stages	level4
B1Y__43672	biological_process	cellular macromolecule metabolic process	2995	0.1516	GO:0044260	B1Y__43672_1	group1: disappeard at specific stages	level4
B1Y__43672	biological_process	cellular macromolecule metabolic process	2995	0.1516	GO:0044260	B1Y__43672_2	group1: disappeard at specific stages	level4
B1Y__43672	biological_process	heterocycle metabolic process	3530	0.1787	GO:0046483	B1Y__43672_1	group1: disappeard at specific stages	level4
B1Y__43672	biological_process	heterocycle metabolic process	3530	0.1787	GO:0046483	B1Y__43672_2	group1: disappeard at specific stages	level4
B1Y__43672	biological_process	organic cyclic compound metabolic process	3531	0.1788	GO:1901360	B1Y__43672_1	group1: disappeard at specific stages	level4
B1Y__43672	biological_process	organic cyclic compound metabolic process	3531	0.1788	GO:1901360	B1Y__43672_2	group1: disappeard at specific stages	level4
B1Y__43672	biological_process	organic substance biosynthetic process	2795	0.1415	GO:1901576	B1Y__43672_1	group1: disappeard at specific stages	level4
B1Y__43672	biological_process	organic substance biosynthetic process	2795	0.1415	GO:1901576	B1Y__43672_2	group1: disappeard at specific stages	level4
B1Y__43795	biological_process	viral process	4311	0.2183	GO:0016032	B1Y__43795_1	group1: disappeard at specific stages	level4
B1Y__43795	cellular_component	host cell part	1347	0.0682	GO:0033643	B1Y__43795_1	group1: disappeard at specific stages	level4
B1Y__43795	cellular_component	host cell	1348	0.0682	GO:0043657	B1Y__43795_1	group1: disappeard at specific stages	level4
B1Y__43795	biological_process	adhesion of symbiont to host cell	394	0.0199	GO:0044650	B1Y__43795_1	group1: disappeard at specific stages	level4
B1Y__43832	cellular_component	host cell part	1347	0.0682	GO:0033643	B1Y__43832_1	group1: disappeard at specific stages	level4
B1Y__43832	cellular_component	host cell	1348	0.0682	GO:0043657	B1Y__43832_1	group1: disappeard at specific stages	level4
B1Y__44350	cellular_component	host cell part	1347	0.0682	GO:0033643	B1Y__44350_1	group1: disappeard at specific stages	level4
B1Y__44350	cellular_component	host cell	1348	0.0682	GO:0043657	B1Y__44350_1	group1: disappeard at specific stages	level4
B1Y__44546	biological_process	generation of precursor metabolites and energy	16	0.0008	GO:0006091	B1Y__44546_2	group1: disappeard at specific stages	level4
B1Y__44546	molecular_function	peptidase activity	96	0.0048	GO:0008233	B1Y__44546_2	group1: disappeard at specific stages	level4
B1Y__44546	biological_process	response to radiation	108	0.0054	GO:0009314	B1Y__44546_2	group1: disappeard at specific stages	level4
B1Y__44546	biological_process	photosynthesis	8	0.0004	GO:0015979	B1Y__44546_2	group1: disappeard at specific stages	level4
B1Y__44546	molecular_function	hydrolase activity, acting on acid anhydrides	1713	0.0867	GO:0016817	B1Y__44546_2	group1: disappeard at specific stages	level4
B1Y__44546	biological_process	regulation of metabolic process	467	0.0236	GO:0019222	B1Y__44546_2	group1: disappeard at specific stages	level4
B1Y__44546	biological_process	protein metabolic process	239	0.0121	GO:0019538	B1Y__44546_2	group1: disappeard at specific stages	level4
B1Y__44546	biological_process	macromolecule metabolic process	3322	0.1682	GO:0043170	B1Y__44546_2	group1: disappeard at specific stages	level4
B1Y__44546	biological_process	cellular catabolic process	418	0.0211	GO:0044248	B1Y__44546_2	group1: disappeard at specific stages	level4
B1Y__44546	biological_process	cellular macromolecule metabolic process	2995	0.1516	GO:0044260	B1Y__44546_2	group1: disappeard at specific stages	level4
B1Y__44546	biological_process	negative regulation of biological process	554	0.028	GO:0048519	B1Y__44546_2	group1: disappeard at specific stages	level4
B1Y__44546	biological_process	regulation of cellular process	768	0.0388	GO:0050794	B1Y__44546_2	group1: disappeard at specific stages	level4
B1Y__44546	biological_process	organonitrogen compound metabolic process	671	0.0339	GO:1901564	B1Y__44546_2	group1: disappeard at specific stages	level4
B1Y__44546	biological_process	organic substance catabolic process	495	0.025	GO:1901575	B1Y__44546_2	group1: disappeard at specific stages	level4
B1Y__48633	molecular_function	ribonuclease activity	301	0.0152	GO:0004540	B1Y__48633_1	group1: disappeard at specific stages	level4
B1Y__48633	biological_process	nucleobase-containing compound metabolic process	3510	0.1777	GO:0006139	B1Y__48633_1	group1: disappeard at specific stages	level4
B1Y__48633	biological_process	cellular aromatic compound metabolic process	3530	0.1787	GO:0006725	B1Y__48633_1	group1: disappeard at specific stages	level4
B1Y__48633	biological_process	viral process	4311	0.2183	GO:0016032	B1Y__48633_1	group1: disappeard at specific stages	level4
B1Y__48633	molecular_function	transferase activity, transferring phosphorus-containing groups	1843	0.0933	GO:0016772	B1Y__48633_1	group1: disappeard at specific stages	level4
B1Y__48633	molecular_function	hydrolase activity, acting on ester bonds	1071	0.0542	GO:0016788	B1Y__48633_1	group1: disappeard at specific stages	level4
B1Y__48633	cellular_component	host cell part	1347	0.0682	GO:0033643	B1Y__48633_1	group1: disappeard at specific stages	level4
B1Y__48633	molecular_function	DNA polymerase activity	1699	0.086	GO:0034061	B1Y__48633_1	group1: disappeard at specific stages	level4
B1Y__48633	biological_process	cellular nitrogen compound metabolic process	3572	0.1809	GO:0034641	B1Y__48633_1	group1: disappeard at specific stages	level4
B1Y__48633	biological_process	macromolecule metabolic process	3322	0.1682	GO:0043170	B1Y__48633_1	group1: disappeard at specific stages	level4
B1Y__48633	cellular_component	host cell	1348	0.0682	GO:0043657	B1Y__48633_1	group1: disappeard at specific stages	level4
B1Y__48633	biological_process	cellular biosynthetic process	2795	0.1415	GO:0044249	B1Y__48633_1	group1: disappeard at specific stages	level4
B1Y__48633	biological_process	cellular macromolecule metabolic process	2995	0.1516	GO:0044260	B1Y__48633_1	group1: disappeard at specific stages	level4
B1Y__48633	biological_process	heterocycle metabolic process	3530	0.1787	GO:0046483	B1Y__48633_1	group1: disappeard at specific stages	level4
B1Y__48633	biological_process	organic cyclic compound metabolic process	3531	0.1788	GO:1901360	B1Y__48633_1	group1: disappeard at specific stages	level4
B1Y__48633	biological_process	organic substance biosynthetic process	2795	0.1415	GO:1901576	B1Y__48633_1	group1: disappeard at specific stages	level4
B1Y__48633	biological_process	response to salt	222	0.0112	GO:1902074	B1Y__48633_1	group1: disappeard at specific stages	level4
B1Y__49207	molecular_function	nucleic acid binding	1291	0.0653	GO:0003676	B1Y__49207_1	group1: disappeard at specific stages	level4
B1Y__49207	biological_process	viral process	4311	0.2183	GO:0016032	B1Y__49207_1	group1: disappeard at specific stages	level4
B1Y__49207	molecular_function	hydrolase activity, acting on acid anhydrides	1713	0.0867	GO:0016817	B1Y__49207_1	group1: disappeard at specific stages	level4
B1Y__49504	biological_process	viral process	4311	0.2183	GO:0016032	B1Y__49504_2	group1: disappeard at specific stages	level4
B1Y__49869	cellular_component	host cell part	1347	0.0682	GO:0033643	B1Y__49869_4	group1: disappeard at specific stages	level4
B1Y__49869	cellular_component	host cell	1348	0.0682	GO:0043657	B1Y__49869_4	group1: disappeard at specific stages	level4
B1Y__49948	molecular_function	DNA-binding transcription factor activity, RNA polymerase II-specific	170	0.0086	GO:0000981	B1Y__49948_1	group1: disappeard at specific stages	level4
B1Y__49948	molecular_function	DNA-binding transcription repressor activity	170	0.0086	GO:0001217	B1Y__49948_1	group1: disappeard at specific stages	level4
B1Y__49948	molecular_function	nucleic acid binding	1291	0.0653	GO:0003676	B1Y__49948_1	group1: disappeard at specific stages	level4
B1Y__49948	biological_process	nucleobase-containing compound metabolic process	3510	0.1777	GO:0006139	B1Y__49948_1	group1: disappeard at specific stages	level4
B1Y__49948	biological_process	cellular aromatic compound metabolic process	3530	0.1787	GO:0006725	B1Y__49948_1	group1: disappeard at specific stages	level4
B1Y__49948	biological_process	response to inorganic substance	243	0.0123	GO:0010035	B1Y__49948_1	group1: disappeard at specific stages	level4
B1Y__49948	molecular_function	hydrolase activity, acting on ester bonds	1071	0.0542	GO:0016788	B1Y__49948_1	group1: disappeard at specific stages	level4
B1Y__49948	cellular_component	transcription repressor complex	170	0.0086	GO:0017053	B1Y__49948_1	group1: disappeard at specific stages	level4
B1Y__49948	biological_process	regulation of metabolic process	467	0.0236	GO:0019222	B1Y__49948_1	group1: disappeard at specific stages	level4
B1Y__49948	biological_process	cellular nitrogen compound metabolic process	3572	0.1809	GO:0034641	B1Y__49948_1	group1: disappeard at specific stages	level4
B1Y__49948	molecular_function	cation binding	645	0.0326	GO:0043169	B1Y__49948_1	group1: disappeard at specific stages	level4
B1Y__49948	biological_process	macromolecule metabolic process	3322	0.1682	GO:0043170	B1Y__49948_1	group1: disappeard at specific stages	level4
B1Y__49948	biological_process	heterocycle metabolic process	3530	0.1787	GO:0046483	B1Y__49948_1	group1: disappeard at specific stages	level4
B1Y__49948	biological_process	negative regulation of biological process	554	0.028	GO:0048519	B1Y__49948_1	group1: disappeard at specific stages	level4
B1Y__49948	biological_process	regulation of cellular process	768	0.0388	GO:0050794	B1Y__49948_1	group1: disappeard at specific stages	level4
B1Y__49948	biological_process	cellular response to chemical stimulus	264	0.0133	GO:0070887	B1Y__49948_1	group1: disappeard at specific stages	level4
B1Y__49948	biological_process	organic cyclic compound metabolic process	3531	0.1788	GO:1901360	B1Y__49948_1	group1: disappeard at specific stages	level4
B1Y__51066	biological_process	nucleobase-containing compound metabolic process	3510	0.1777	GO:0006139	B1Y__51066_2	group1: disappeard at specific stages	level4
B1Y__51066	biological_process	cellular aromatic compound metabolic process	3530	0.1787	GO:0006725	B1Y__51066_2	group1: disappeard at specific stages	level4
B1Y__51066	biological_process	viral process	4311	0.2183	GO:0016032	B1Y__51066_2	group1: disappeard at specific stages	level4
B1Y__51066	molecular_function	transferase activity, transferring phosphorus-containing groups	1843	0.0933	GO:0016772	B1Y__51066_2	group1: disappeard at specific stages	level4
B1Y__51066	molecular_function	DNA polymerase activity	1699	0.086	GO:0034061	B1Y__51066_2	group1: disappeard at specific stages	level4
B1Y__51066	biological_process	cellular nitrogen compound metabolic process	3572	0.1809	GO:0034641	B1Y__51066_2	group1: disappeard at specific stages	level4
B1Y__51066	biological_process	macromolecule metabolic process	3322	0.1682	GO:0043170	B1Y__51066_2	group1: disappeard at specific stages	level4
B1Y__51066	biological_process	cellular biosynthetic process	2795	0.1415	GO:0044249	B1Y__51066_2	group1: disappeard at specific stages	level4
B1Y__51066	biological_process	cellular macromolecule metabolic process	2995	0.1516	GO:0044260	B1Y__51066_2	group1: disappeard at specific stages	level4
B1Y__51066	biological_process	heterocycle metabolic process	3530	0.1787	GO:0046483	B1Y__51066_2	group1: disappeard at specific stages	level4
B1Y__51066	biological_process	organic cyclic compound metabolic process	3531	0.1788	GO:1901360	B1Y__51066_2	group1: disappeard at specific stages	level4
B1Y__51066	biological_process	organic substance biosynthetic process	2795	0.1415	GO:1901576	B1Y__51066_2	group1: disappeard at specific stages	level4
B1Y__51264	biological_process	viral process	4311	0.2183	GO:0016032	B1Y__51264_1	group1: disappeard at specific stages	level4
B1Y__51627	biological_process	viral process	4311	0.2183	GO:0016032	B1Y__51627_4	group1: disappeard at specific stages	level4
B1Y__51773	molecular_function	nucleic acid binding	1291	0.0653	GO:0003676	B1Y__51773_5	group1: disappeard at specific stages	level4
B1Y__51773	biological_process	viral process	4311	0.2183	GO:0016032	B1Y__51773_5	group1: disappeard at specific stages	level4
B1Y__51773	molecular_function	hydrolase activity, acting on acid anhydrides	1713	0.0867	GO:0016817	B1Y__51773_5	group1: disappeard at specific stages	level4
B1Y__51917	biological_process	viral process	4311	0.2183	GO:0016032	B1Y__51917_1	group1: disappeard at specific stages	level4
B1Y__52081	biological_process	viral process	4311	0.2183	GO:0016032	B1Y__52081_6	group1: disappeard at specific stages	level4
B1Y__52081	cellular_component	outer membrane	124	0.0062	GO:0019867	B1Y__52081_6	group1: disappeard at specific stages	level4
B1Y__52081	cellular_component	cell envelope	136	0.0068	GO:0030313	B1Y__52081_6	group1: disappeard at specific stages	level4
B1Y__52081	biological_process	adhesion of symbiont to host cell	394	0.0199	GO:0044650	B1Y__52081_6	group1: disappeard at specific stages	level4
B1Y__52081	biological_process	interaction with host	589	0.0298	GO:0051701	B1Y__52081_6	group1: disappeard at specific stages	level4
B1Y__53899	molecular_function	lysozyme activity	213	0.0107	GO:0003796	B1Y__53899_4	group1: disappeard at specific stages	level4
B1Y__53899	biological_process	carbohydrate metabolic process	92	0.0046	GO:0005975	B1Y__53899_4	group1: disappeard at specific stages	level4
B1Y__53899	biological_process	response to bacterium	104	0.0052	GO:0009617	B1Y__53899_4	group1: disappeard at specific stages	level4
B1Y__53899	molecular_function	hydrolase activity, acting on glycosyl bonds	307	0.0155	GO:0016798	B1Y__53899_4	group1: disappeard at specific stages	level4
B1Y__53899	biological_process	macromolecule metabolic process	3322	0.1682	GO:0043170	B1Y__53899_4	group1: disappeard at specific stages	level4
B1Y__53899	biological_process	response to external biotic stimulus	186	0.0094	GO:0043207	B1Y__53899_4	group1: disappeard at specific stages	level4
B1Y__53899	biological_process	multi-organism catabolic process	78	0.0039	GO:0044035	B1Y__53899_4	group1: disappeard at specific stages	level4
B1Y__53899	biological_process	multi-organism carbohydrate metabolic process	78	0.0039	GO:0044040	B1Y__53899_4	group1: disappeard at specific stages	level4
B1Y__53899	biological_process	cell wall disruption in other organism	78	0.0039	GO:0044278	B1Y__53899_4	group1: disappeard at specific stages	level4
B1Y__53899	biological_process	carbohydrate derivative metabolic process	537	0.0271	GO:1901135	B1Y__53899_4	group1: disappeard at specific stages	level4
B1Y__53899	biological_process	organonitrogen compound metabolic process	671	0.0339	GO:1901564	B1Y__53899_4	group1: disappeard at specific stages	level4
B1Y__53899	biological_process	organic substance catabolic process	495	0.025	GO:1901575	B1Y__53899_4	group1: disappeard at specific stages	level4
B1Y__54120	cellular_component	host cell part	1347	0.0682	GO:0033643	B1Y__54120_1	group1: disappeard at specific stages	level4
B1Y__54120	cellular_component	host cell	1348	0.0682	GO:0043657	B1Y__54120_1	group1: disappeard at specific stages	level4
B1Y__54844	molecular_function	DNA helicase activity	130	0.0065	GO:0003678	B1Y__54844_7	group1: disappeard at specific stages	level4
B1Y__54844	biological_process	nucleobase-containing compound metabolic process	3510	0.1777	GO:0006139	B1Y__54844_7	group1: disappeard at specific stages	level4
B1Y__54844	biological_process	cellular aromatic compound metabolic process	3530	0.1787	GO:0006725	B1Y__54844_7	group1: disappeard at specific stages	level4
B1Y__54844	biological_process	cellular component organization	509	0.0257	GO:0016043	B1Y__54844_7	group1: disappeard at specific stages	level4
B1Y__54844	molecular_function	hydrolase activity, acting on acid anhydrides	1713	0.0867	GO:0016817	B1Y__54844_7	group1: disappeard at specific stages	level4
B1Y__54844	biological_process	cellular nitrogen compound metabolic process	3572	0.1809	GO:0034641	B1Y__54844_7	group1: disappeard at specific stages	level4
B1Y__54844	biological_process	macromolecule metabolic process	3322	0.1682	GO:0043170	B1Y__54844_7	group1: disappeard at specific stages	level4
B1Y__54844	biological_process	cellular biosynthetic process	2795	0.1415	GO:0044249	B1Y__54844_7	group1: disappeard at specific stages	level4
B1Y__54844	biological_process	cellular macromolecule metabolic process	2995	0.1516	GO:0044260	B1Y__54844_7	group1: disappeard at specific stages	level4
B1Y__54844	biological_process	heterocycle metabolic process	3530	0.1787	GO:0046483	B1Y__54844_7	group1: disappeard at specific stages	level4
B1Y__54844	biological_process	organic cyclic compound metabolic process	3531	0.1788	GO:1901360	B1Y__54844_7	group1: disappeard at specific stages	level4
B1Y__54844	biological_process	organic substance biosynthetic process	2795	0.1415	GO:1901576	B1Y__54844_7	group1: disappeard at specific stages	level4
B1Y__57643	molecular_function	nucleotide binding	421	0.0213	GO:0000166	B1Y__57643_4	group1: disappeard at specific stages	level4
B1Y__57643	molecular_function	DNA-binding transcription factor activity, RNA polymerase II-specific	170	0.0086	GO:0000981	B1Y__57643_3	group1: disappeard at specific stages	level4
B1Y__57643	molecular_function	DNA-binding transcription repressor activity	170	0.0086	GO:0001217	B1Y__57643_3	group1: disappeard at specific stages	level4
B1Y__57643	molecular_function	nucleic acid binding	1291	0.0653	GO:0003676	B1Y__57643_3	group1: disappeard at specific stages	level4
B1Y__57643	molecular_function	DNA helicase activity	130	0.0065	GO:0003678	B1Y__57643_4	group1: disappeard at specific stages	level4
B1Y__57643	molecular_function	DNA topoisomerase activity	92	0.0046	GO:0003916	B1Y__57643_4	group1: disappeard at specific stages	level4
B1Y__57643	cellular_component	cell wall	205	0.0103	GO:0005618	B1Y__57643_4	group1: disappeard at specific stages	level4
B1Y__57643	cellular_component	plasma membrane	344	0.0174	GO:0005886	B1Y__57643_4	group1: disappeard at specific stages	level4
B1Y__57643	biological_process	nucleobase-containing compound metabolic process	3510	0.1777	GO:0006139	B1Y__57643_3	group1: disappeard at specific stages	level4
B1Y__57643	biological_process	nucleobase-containing compound metabolic process	3510	0.1777	GO:0006139	B1Y__57643_4	group1: disappeard at specific stages	level4
B1Y__57643	biological_process	cellular aromatic compound metabolic process	3530	0.1787	GO:0006725	B1Y__57643_3	group1: disappeard at specific stages	level4
B1Y__57643	biological_process	cellular aromatic compound metabolic process	3530	0.1787	GO:0006725	B1Y__57643_4	group1: disappeard at specific stages	level4
B1Y__57643	biological_process	response to inorganic substance	243	0.0123	GO:0010035	B1Y__57643_3	group1: disappeard at specific stages	level4
B1Y__57643	biological_process	cellular component organization	509	0.0257	GO:0016043	B1Y__57643_4	group1: disappeard at specific stages	level4
B1Y__57643	molecular_function	hydrolase activity, acting on ester bonds	1071	0.0542	GO:0016788	B1Y__57643_3	group1: disappeard at specific stages	level4
B1Y__57643	molecular_function	hydrolase activity, acting on acid anhydrides	1713	0.0867	GO:0016817	B1Y__57643_4	group1: disappeard at specific stages	level4
B1Y__57643	cellular_component	transcription repressor complex	170	0.0086	GO:0017053	B1Y__57643_3	group1: disappeard at specific stages	level4
B1Y__57643	biological_process	regulation of metabolic process	467	0.0236	GO:0019222	B1Y__57643_3	group1: disappeard at specific stages	level4
B1Y__57643	molecular_function	ribonucleotide binding	353	0.0178	GO:0032553	B1Y__57643_4	group1: disappeard at specific stages	level4
B1Y__57643	biological_process	cellular nitrogen compound metabolic process	3572	0.1809	GO:0034641	B1Y__57643_3	group1: disappeard at specific stages	level4
B1Y__57643	biological_process	cellular nitrogen compound metabolic process	3572	0.1809	GO:0034641	B1Y__57643_4	group1: disappeard at specific stages	level4
B1Y__57643	molecular_function	anion binding	423	0.0214	GO:0043168	B1Y__57643_4	group1: disappeard at specific stages	level4
B1Y__57643	molecular_function	cation binding	645	0.0326	GO:0043169	B1Y__57643_3	group1: disappeard at specific stages	level4
B1Y__57643	molecular_function	cation binding	645	0.0326	GO:0043169	B1Y__57643_4	group1: disappeard at specific stages	level4
B1Y__57643	biological_process	macromolecule metabolic process	3322	0.1682	GO:0043170	B1Y__57643_3	group1: disappeard at specific stages	level4
B1Y__57643	biological_process	macromolecule metabolic process	3322	0.1682	GO:0043170	B1Y__57643_4	group1: disappeard at specific stages	level4
B1Y__57643	biological_process	cellular biosynthetic process	2795	0.1415	GO:0044249	B1Y__57643_4	group1: disappeard at specific stages	level4
B1Y__57643	biological_process	cellular macromolecule metabolic process	2995	0.1516	GO:0044260	B1Y__57643_4	group1: disappeard at specific stages	level4
B1Y__57643	biological_process	heterocycle metabolic process	3530	0.1787	GO:0046483	B1Y__57643_3	group1: disappeard at specific stages	level4
B1Y__57643	biological_process	heterocycle metabolic process	3530	0.1787	GO:0046483	B1Y__57643_4	group1: disappeard at specific stages	level4
B1Y__57643	biological_process	negative regulation of biological process	554	0.028	GO:0048519	B1Y__57643_3	group1: disappeard at specific stages	level4
B1Y__57643	biological_process	regulation of cellular process	768	0.0388	GO:0050794	B1Y__57643_3	group1: disappeard at specific stages	level4
B1Y__57643	biological_process	cellular response to chemical stimulus	264	0.0133	GO:0070887	B1Y__57643_3	group1: disappeard at specific stages	level4
B1Y__57643	molecular_function	nucleoside phosphate binding	421	0.0213	GO:1901265	B1Y__57643_4	group1: disappeard at specific stages	level4
B1Y__57643	biological_process	organic cyclic compound metabolic process	3531	0.1788	GO:1901360	B1Y__57643_3	group1: disappeard at specific stages	level4
B1Y__57643	biological_process	organic cyclic compound metabolic process	3531	0.1788	GO:1901360	B1Y__57643_4	group1: disappeard at specific stages	level4
B1Y__57643	biological_process	organic substance biosynthetic process	2795	0.1415	GO:1901576	B1Y__57643_4	group1: disappeard at specific stages	level4
B1Y__58923	molecular_function	nucleic acid binding	1291	0.0653	GO:0003676	B1Y__58923_5	group1: disappeard at specific stages	level4
B1Y__58923	biological_process	viral process	4311	0.2183	GO:0016032	B1Y__58923_5	group1: disappeard at specific stages	level4
B1Y__58923	molecular_function	hydrolase activity, acting on acid anhydrides	1713	0.0867	GO:0016817	B1Y__58923_5	group1: disappeard at specific stages	level4
B1Y__62333	molecular_function	identical protein binding	443	0.0224	GO:0042802	B1Y__62333_5	group1: disappeard at specific stages	level4
B1Y__62502	molecular_function	hydrolase activity, acting on acid anhydrides	1713	0.0867	GO:0016817	B1Y__62502_4	group1: disappeard at specific stages	level4
B1Y__62943	cellular_component	host cell part	1347	0.0682	GO:0033643	B1Y__62943_2	group1: disappeard at specific stages	level4
B1Y__62943	cellular_component	host cell	1348	0.0682	GO:0043657	B1Y__62943_2	group1: disappeard at specific stages	level4
B1Y__63113	molecular_function	nucleic acid binding	1291	0.0653	GO:0003676	B1Y__63113_2	group1: disappeard at specific stages	level4
B1Y__63113	biological_process	viral process	4311	0.2183	GO:0016032	B1Y__63113_2	group1: disappeard at specific stages	level4
B1Y__63113	molecular_function	hydrolase activity, acting on acid anhydrides	1713	0.0867	GO:0016817	B1Y__63113_2	group1: disappeard at specific stages	level4
B1Y__64043	molecular_function	ribonuclease activity	301	0.0152	GO:0004540	B1Y__64043_11	group1: disappeard at specific stages	level4
B1Y__64043	biological_process	nucleobase-containing compound metabolic process	3510	0.1777	GO:0006139	B1Y__64043_11	group1: disappeard at specific stages	level4
B1Y__64043	biological_process	cellular aromatic compound metabolic process	3530	0.1787	GO:0006725	B1Y__64043_11	group1: disappeard at specific stages	level4
B1Y__64043	molecular_function	hydrolase activity, acting on ester bonds	1071	0.0542	GO:0016788	B1Y__64043_11	group1: disappeard at specific stages	level4
B1Y__64043	biological_process	cellular nitrogen compound metabolic process	3572	0.1809	GO:0034641	B1Y__64043_11	group1: disappeard at specific stages	level4
B1Y__64043	biological_process	macromolecule metabolic process	3322	0.1682	GO:0043170	B1Y__64043_11	group1: disappeard at specific stages	level4
B1Y__64043	biological_process	cellular catabolic process	418	0.0211	GO:0044248	B1Y__64043_11	group1: disappeard at specific stages	level4
B1Y__64043	biological_process	cellular biosynthetic process	2795	0.1415	GO:0044249	B1Y__64043_11	group1: disappeard at specific stages	level4
B1Y__64043	biological_process	cellular macromolecule metabolic process	2995	0.1516	GO:0044260	B1Y__64043_11	group1: disappeard at specific stages	level4
B1Y__64043	biological_process	heterocycle metabolic process	3530	0.1787	GO:0046483	B1Y__64043_11	group1: disappeard at specific stages	level4
B1Y__64043	biological_process	organic cyclic compound metabolic process	3531	0.1788	GO:1901360	B1Y__64043_11	group1: disappeard at specific stages	level4
B1Y__64043	biological_process	organic substance catabolic process	495	0.025	GO:1901575	B1Y__64043_11	group1: disappeard at specific stages	level4
B1Y__64043	biological_process	organic substance biosynthetic process	2795	0.1415	GO:1901576	B1Y__64043_11	group1: disappeard at specific stages	level4
B1Y__65094	molecular_function	lysozyme activity	213	0.0107	GO:0003796	B1Y__65094_4	group1: disappeard at specific stages	level4
B1Y__65094	molecular_function	hydrolase activity, acting on glycosyl bonds	307	0.0155	GO:0016798	B1Y__65094_4	group1: disappeard at specific stages	level4
B1Y__65821	molecular_function	nucleic acid binding	1291	0.0653	GO:0003676	B1Y__65821_1	group1: disappeard at specific stages	level4
B1Y__65821	biological_process	viral process	4311	0.2183	GO:0016032	B1Y__65821_1	group1: disappeard at specific stages	level4
B1Y__65821	molecular_function	hydrolase activity, acting on acid anhydrides	1713	0.0867	GO:0016817	B1Y__65821_1	group1: disappeard at specific stages	level4
B1Y__65821	cellular_component	host cell part	1347	0.0682	GO:0033643	B1Y__65821_3	group1: disappeard at specific stages	level4
B1Y__65821	cellular_component	host cell	1348	0.0682	GO:0043657	B1Y__65821_3	group1: disappeard at specific stages	level4
B1Y__66092	molecular_function	hydrolase activity, acting on acid anhydrides	1713	0.0867	GO:0016817	B1Y__66092_4	group1: disappeard at specific stages	level4
B1Y__66423	biological_process	nucleobase-containing compound metabolic process	3510	0.1777	GO:0006139	B1Y__66423_4	group1: disappeard at specific stages	level4
B1Y__66423	biological_process	cellular aromatic compound metabolic process	3530	0.1787	GO:0006725	B1Y__66423_4	group1: disappeard at specific stages	level4
B1Y__66423	biological_process	viral process	4311	0.2183	GO:0016032	B1Y__66423_4	group1: disappeard at specific stages	level4
B1Y__66423	molecular_function	transferase activity, transferring phosphorus-containing groups	1843	0.0933	GO:0016772	B1Y__66423_4	group1: disappeard at specific stages	level4
B1Y__66423	molecular_function	DNA polymerase activity	1699	0.086	GO:0034061	B1Y__66423_4	group1: disappeard at specific stages	level4
B1Y__66423	biological_process	cellular nitrogen compound metabolic process	3572	0.1809	GO:0034641	B1Y__66423_4	group1: disappeard at specific stages	level4
B1Y__66423	biological_process	macromolecule metabolic process	3322	0.1682	GO:0043170	B1Y__66423_4	group1: disappeard at specific stages	level4
B1Y__66423	biological_process	cellular biosynthetic process	2795	0.1415	GO:0044249	B1Y__66423_4	group1: disappeard at specific stages	level4
B1Y__66423	biological_process	cellular macromolecule metabolic process	2995	0.1516	GO:0044260	B1Y__66423_4	group1: disappeard at specific stages	level4
B1Y__66423	biological_process	heterocycle metabolic process	3530	0.1787	GO:0046483	B1Y__66423_4	group1: disappeard at specific stages	level4
B1Y__66423	biological_process	organic cyclic compound metabolic process	3531	0.1788	GO:1901360	B1Y__66423_4	group1: disappeard at specific stages	level4
B1Y__66423	biological_process	organic substance biosynthetic process	2795	0.1415	GO:1901576	B1Y__66423_4	group1: disappeard at specific stages	level4
B1Y__66473	cellular_component	host cell part	1347	0.0682	GO:0033643	B1Y__66473_2	group1: disappeard at specific stages	level4
B1Y__66473	cellular_component	host cell	1348	0.0682	GO:0043657	B1Y__66473_2	group1: disappeard at specific stages	level4
B1Y__67675	cellular_component	host cell part	1347	0.0682	GO:0033643	B1Y__67675_2	group1: disappeard at specific stages	level4
B1Y__67675	cellular_component	host cell	1348	0.0682	GO:0043657	B1Y__67675_2	group1: disappeard at specific stages	level4
B1Y__67885	biological_process	viral process	4311	0.2183	GO:0016032	B1Y__67885_9	group1: disappeard at specific stages	level4
B1Y__68682	molecular_function	recombinase activity	48	0.0024	GO:0000150	B1Y__68682_3	group1: disappeard at specific stages	level4
B1Y__68682	biological_process	nucleobase-containing compound metabolic process	3510	0.1777	GO:0006139	B1Y__68682_3	group1: disappeard at specific stages	level4
B1Y__68682	biological_process	cellular aromatic compound metabolic process	3530	0.1787	GO:0006725	B1Y__68682_3	group1: disappeard at specific stages	level4
B1Y__68682	molecular_function	integrase activity	69	0.0034	GO:0008907	B1Y__68682_3	group1: disappeard at specific stages	level4
B1Y__68682	biological_process	response to radiation	108	0.0054	GO:0009314	B1Y__68682_3	group1: disappeard at specific stages	level4
B1Y__68682	biological_process	viral process	4311	0.2183	GO:0016032	B1Y__68682_4	group1: disappeard at specific stages	level4
B1Y__68682	biological_process	cellular nitrogen compound metabolic process	3572	0.1809	GO:0034641	B1Y__68682_3	group1: disappeard at specific stages	level4
B1Y__68682	biological_process	macromolecule metabolic process	3322	0.1682	GO:0043170	B1Y__68682_3	group1: disappeard at specific stages	level4
B1Y__68682	biological_process	cellular macromolecule metabolic process	2995	0.1516	GO:0044260	B1Y__68682_3	group1: disappeard at specific stages	level4
B1Y__68682	biological_process	heterocycle metabolic process	3530	0.1787	GO:0046483	B1Y__68682_3	group1: disappeard at specific stages	level4
B1Y__68682	biological_process	organic cyclic compound metabolic process	3531	0.1788	GO:1901360	B1Y__68682_3	group1: disappeard at specific stages	level4
B1Y__68682	cellular_component	endonuclease complex	49	0.0024	GO:1905348	B1Y__68682_3	group1: disappeard at specific stages	level4
B1Y__69858	molecular_function	ribonuclease activity	301	0.0152	GO:0004540	B1Y__69858_1	group1: disappeard at specific stages	level4
B1Y__69858	biological_process	nucleobase-containing compound metabolic process	3510	0.1777	GO:0006139	B1Y__69858_1	group1: disappeard at specific stages	level4
B1Y__69858	biological_process	cellular aromatic compound metabolic process	3530	0.1787	GO:0006725	B1Y__69858_1	group1: disappeard at specific stages	level4
B1Y__69858	biological_process	viral process	4311	0.2183	GO:0016032	B1Y__69858_1	group1: disappeard at specific stages	level4
B1Y__69858	molecular_function	transferase activity, transferring phosphorus-containing groups	1843	0.0933	GO:0016772	B1Y__69858_1	group1: disappeard at specific stages	level4
B1Y__69858	molecular_function	hydrolase activity, acting on ester bonds	1071	0.0542	GO:0016788	B1Y__69858_1	group1: disappeard at specific stages	level4
B1Y__69858	cellular_component	host cell part	1347	0.0682	GO:0033643	B1Y__69858_1	group1: disappeard at specific stages	level4
B1Y__69858	molecular_function	DNA polymerase activity	1699	0.086	GO:0034061	B1Y__69858_1	group1: disappeard at specific stages	level4
B1Y__69858	biological_process	cellular nitrogen compound metabolic process	3572	0.1809	GO:0034641	B1Y__69858_1	group1: disappeard at specific stages	level4
B1Y__69858	biological_process	macromolecule metabolic process	3322	0.1682	GO:0043170	B1Y__69858_1	group1: disappeard at specific stages	level4
B1Y__69858	cellular_component	host cell	1348	0.0682	GO:0043657	B1Y__69858_1	group1: disappeard at specific stages	level4
B1Y__69858	biological_process	cellular biosynthetic process	2795	0.1415	GO:0044249	B1Y__69858_1	group1: disappeard at specific stages	level4
B1Y__69858	biological_process	cellular macromolecule metabolic process	2995	0.1516	GO:0044260	B1Y__69858_1	group1: disappeard at specific stages	level4
B1Y__69858	biological_process	heterocycle metabolic process	3530	0.1787	GO:0046483	B1Y__69858_1	group1: disappeard at specific stages	level4
B1Y__69858	biological_process	organic cyclic compound metabolic process	3531	0.1788	GO:1901360	B1Y__69858_1	group1: disappeard at specific stages	level4
B1Y__69858	biological_process	organic substance biosynthetic process	2795	0.1415	GO:1901576	B1Y__69858_1	group1: disappeard at specific stages	level4
B1Y__69858	biological_process	response to salt	222	0.0112	GO:1902074	B1Y__69858_1	group1: disappeard at specific stages	level4
B1Y__70958	biological_process	nucleobase-containing compound metabolic process	3510	0.1777	GO:0006139	B1Y__70958_4	group1: disappeard at specific stages	level4
B1Y__70958	biological_process	cellular aromatic compound metabolic process	3530	0.1787	GO:0006725	B1Y__70958_4	group1: disappeard at specific stages	level4
B1Y__70958	molecular_function	transferase activity, transferring phosphorus-containing groups	1843	0.0933	GO:0016772	B1Y__70958_4	group1: disappeard at specific stages	level4
B1Y__70958	molecular_function	hydrolase activity, acting on ester bonds	1071	0.0542	GO:0016788	B1Y__70958_4	group1: disappeard at specific stages	level4
B1Y__70958	molecular_function	DNA polymerase activity	1699	0.086	GO:0034061	B1Y__70958_4	group1: disappeard at specific stages	level4
B1Y__70958	biological_process	cellular nitrogen compound metabolic process	3572	0.1809	GO:0034641	B1Y__70958_4	group1: disappeard at specific stages	level4
B1Y__70958	biological_process	macromolecule metabolic process	3322	0.1682	GO:0043170	B1Y__70958_4	group1: disappeard at specific stages	level4
B1Y__70958	biological_process	cellular biosynthetic process	2795	0.1415	GO:0044249	B1Y__70958_4	group1: disappeard at specific stages	level4
B1Y__70958	biological_process	cellular macromolecule metabolic process	2995	0.1516	GO:0044260	B1Y__70958_4	group1: disappeard at specific stages	level4
B1Y__70958	biological_process	heterocycle metabolic process	3530	0.1787	GO:0046483	B1Y__70958_4	group1: disappeard at specific stages	level4
B1Y__70958	biological_process	organic cyclic compound metabolic process	3531	0.1788	GO:1901360	B1Y__70958_4	group1: disappeard at specific stages	level4
B1Y__70958	biological_process	organic substance biosynthetic process	2795	0.1415	GO:1901576	B1Y__70958_4	group1: disappeard at specific stages	level4
B1Y__71178	biological_process	nucleobase-containing compound metabolic process	3510	0.1777	GO:0006139	B1Y__71178_13	group1: disappeard at specific stages	level4
B1Y__71178	biological_process	cellular aromatic compound metabolic process	3530	0.1787	GO:0006725	B1Y__71178_13	group1: disappeard at specific stages	level4
B1Y__71178	biological_process	cellular nitrogen compound metabolic process	3572	0.1809	GO:0034641	B1Y__71178_13	group1: disappeard at specific stages	level4
B1Y__71178	biological_process	macromolecule metabolic process	3322	0.1682	GO:0043170	B1Y__71178_13	group1: disappeard at specific stages	level4
B1Y__71178	biological_process	cellular macromolecule metabolic process	2995	0.1516	GO:0044260	B1Y__71178_13	group1: disappeard at specific stages	level4
B1Y__71178	biological_process	heterocycle metabolic process	3530	0.1787	GO:0046483	B1Y__71178_13	group1: disappeard at specific stages	level4
B1Y__71178	biological_process	organic cyclic compound metabolic process	3531	0.1788	GO:1901360	B1Y__71178_13	group1: disappeard at specific stages	level4
B1Y__71352	biological_process	viral process	4311	0.2183	GO:0016032	B1Y__71352_1	group1: disappeard at specific stages	level4
B1Y__71352	biological_process	viral process	4311	0.2183	GO:0016032	B1Y__71352_5	group1: disappeard at specific stages	level4
B1Y__71430	biological_process	viral process	4311	0.2183	GO:0016032	B1Y__71430_1	group1: disappeard at specific stages	level4
B1Y__71430	biological_process	viral process	4311	0.2183	GO:0016032	B1Y__71430_3	group1: disappeard at specific stages	level4
B1Y__71601	molecular_function	recombinase activity	48	0.0024	GO:0000150	B1Y__71601_5	group1: disappeard at specific stages	level4
B1Y__71601	biological_process	nucleobase-containing compound metabolic process	3510	0.1777	GO:0006139	B1Y__71601_5	group1: disappeard at specific stages	level4
B1Y__71601	biological_process	cellular aromatic compound metabolic process	3530	0.1787	GO:0006725	B1Y__71601_5	group1: disappeard at specific stages	level4
B1Y__71601	molecular_function	integrase activity	69	0.0034	GO:0008907	B1Y__71601_5	group1: disappeard at specific stages	level4
B1Y__71601	biological_process	response to radiation	108	0.0054	GO:0009314	B1Y__71601_5	group1: disappeard at specific stages	level4
B1Y__71601	biological_process	cellular nitrogen compound metabolic process	3572	0.1809	GO:0034641	B1Y__71601_5	group1: disappeard at specific stages	level4
B1Y__71601	biological_process	macromolecule metabolic process	3322	0.1682	GO:0043170	B1Y__71601_5	group1: disappeard at specific stages	level4
B1Y__71601	biological_process	cellular macromolecule metabolic process	2995	0.1516	GO:0044260	B1Y__71601_5	group1: disappeard at specific stages	level4
B1Y__71601	biological_process	heterocycle metabolic process	3530	0.1787	GO:0046483	B1Y__71601_5	group1: disappeard at specific stages	level4
B1Y__71601	biological_process	organic cyclic compound metabolic process	3531	0.1788	GO:1901360	B1Y__71601_5	group1: disappeard at specific stages	level4
B1Y__71601	cellular_component	endonuclease complex	49	0.0024	GO:1905348	B1Y__71601_5	group1: disappeard at specific stages	level4
B1Y__71785	biological_process	viral process	4311	0.2183	GO:0016032	B1Y__71785_1	group1: disappeard at specific stages	level4
B1Y__9933	cellular_component	host cell part	1347	0.0682	GO:0033643	B1Y__9933_6	group1: disappeard at specific stages	level4
B1Y__9933	cellular_component	host cell	1348	0.0682	GO:0043657	B1Y__9933_6	group1: disappeard at specific stages	level4
B2Y__10974	biological_process	viral process	4311	0.2183	GO:0016032	B2Y__10974_3	group1: disappeard at specific stages	level4
B2Y__11398	biological_process	nucleobase-containing compound metabolic process	3510	0.1777	GO:0006139	B2Y__11398_2	group1: disappeard at specific stages	level4
B2Y__11398	biological_process	cellular aromatic compound metabolic process	3530	0.1787	GO:0006725	B2Y__11398_2	group1: disappeard at specific stages	level4
B2Y__11398	biological_process	cellular nitrogen compound metabolic process	3572	0.1809	GO:0034641	B2Y__11398_2	group1: disappeard at specific stages	level4
B2Y__11398	biological_process	macromolecule metabolic process	3322	0.1682	GO:0043170	B2Y__11398_2	group1: disappeard at specific stages	level4
B2Y__11398	biological_process	cellular macromolecule metabolic process	2995	0.1516	GO:0044260	B2Y__11398_2	group1: disappeard at specific stages	level4
B2Y__11398	biological_process	heterocycle metabolic process	3530	0.1787	GO:0046483	B2Y__11398_2	group1: disappeard at specific stages	level4
B2Y__11398	biological_process	organic cyclic compound metabolic process	3531	0.1788	GO:1901360	B2Y__11398_2	group1: disappeard at specific stages	level4
B2Y__1202	biological_process	viral process	4311	0.2183	GO:0016032	B2Y__1202_1	group1: disappeard at specific stages	level4
B2Y__1202	molecular_function	hydrolase activity, acting on glycosyl bonds	307	0.0155	GO:0016798	B2Y__1202_1	group1: disappeard at specific stages	level4
B2Y__1202	biological_process	response to external biotic stimulus	186	0.0094	GO:0043207	B2Y__1202_1	group1: disappeard at specific stages	level4
B2Y__1202	biological_process	adhesion of symbiont to host cell	394	0.0199	GO:0044650	B2Y__1202_1	group1: disappeard at specific stages	level4
B2Y__1202	biological_process	interaction with host	589	0.0298	GO:0051701	B2Y__1202_1	group1: disappeard at specific stages	level4
B2Y__1202	biological_process	modulation of process of other organism involved in symbiotic interaction	168	0.0085	GO:0051817	B2Y__1202_1	group1: disappeard at specific stages	level4
B2Y__1202	biological_process	response to defenses of other organism	62	0.0031	GO:0052173	B2Y__1202_1	group1: disappeard at specific stages	level4
B2Y__1202	biological_process	response to host	62	0.0031	GO:0075136	B2Y__1202_1	group1: disappeard at specific stages	level4
B2Y__12531	biological_process	viral process	4311	0.2183	GO:0016032	B2Y__12531_3	group1: disappeard at specific stages	level4
B2Y__12531	molecular_function	identical protein binding	443	0.0224	GO:0042802	B2Y__12531_3	group1: disappeard at specific stages	level4
B2Y__12531	biological_process	adhesion of symbiont to host cell	394	0.0199	GO:0044650	B2Y__12531_3	group1: disappeard at specific stages	level4
B2Y__12649	molecular_function	lysozyme activity	213	0.0107	GO:0003796	B2Y__12649_2	group1: disappeard at specific stages	level4
B2Y__12649	molecular_function	hydrolase activity, acting on glycosyl bonds	307	0.0155	GO:0016798	B2Y__12649_2	group1: disappeard at specific stages	level4
B2Y__12649	cellular_component	host cell part	1347	0.0682	GO:0033643	B2Y__12649_1	group1: disappeard at specific stages	level4
B2Y__12649	cellular_component	host cell	1348	0.0682	GO:0043657	B2Y__12649_1	group1: disappeard at specific stages	level4
B2Y__13234	biological_process	viral process	4311	0.2183	GO:0016032	B2Y__13234_1	group1: disappeard at specific stages	level4
B2Y__15143	molecular_function	identical protein binding	443	0.0224	GO:0042802	B2Y__15143_6	group1: disappeard at specific stages	level4
B2Y__16502	cellular_component	outer membrane	124	0.0062	GO:0019867	B2Y__16502_2	group1: disappeard at specific stages	level4
B2Y__16502	cellular_component	cell envelope	136	0.0068	GO:0030313	B2Y__16502_2	group1: disappeard at specific stages	level4
B2Y__16502	biological_process	cell-substrate adhesion	78	0.0039	GO:0031589	B2Y__16502_2	group1: disappeard at specific stages	level4
B2Y__16502	biological_process	interaction with host	589	0.0298	GO:0051701	B2Y__16502_2	group1: disappeard at specific stages	level4
B2Y__16502	biological_process	aggregation of unicellular organisms	78	0.0039	GO:0098630	B2Y__16502_2	group1: disappeard at specific stages	level4
B2Y__16821	biological_process	nucleobase-containing compound metabolic process	3510	0.1777	GO:0006139	B2Y__16821_5	group1: disappeard at specific stages	level4
B2Y__16821	biological_process	cellular aromatic compound metabolic process	3530	0.1787	GO:0006725	B2Y__16821_5	group1: disappeard at specific stages	level4
B2Y__16821	biological_process	viral process	4311	0.2183	GO:0016032	B2Y__16821_5	group1: disappeard at specific stages	level4
B2Y__16821	biological_process	cellular component organization	509	0.0257	GO:0016043	B2Y__16821_5	group1: disappeard at specific stages	level4
B2Y__16821	molecular_function	hydrolase activity, acting on ester bonds	1071	0.0542	GO:0016788	B2Y__16821_5	group1: disappeard at specific stages	level4
B2Y__16821	biological_process	cellular nitrogen compound metabolic process	3572	0.1809	GO:0034641	B2Y__16821_5	group1: disappeard at specific stages	level4
B2Y__16821	biological_process	macromolecule metabolic process	3322	0.1682	GO:0043170	B2Y__16821_5	group1: disappeard at specific stages	level4
B2Y__16821	biological_process	cellular component biogenesis	182	0.0092	GO:0044085	B2Y__16821_5	group1: disappeard at specific stages	level4
B2Y__16821	biological_process	heterocycle metabolic process	3530	0.1787	GO:0046483	B2Y__16821_5	group1: disappeard at specific stages	level4
B2Y__16821	biological_process	organic cyclic compound metabolic process	3531	0.1788	GO:1901360	B2Y__16821_5	group1: disappeard at specific stages	level4
B2Y__16821	cellular_component	ATPase complex	140	0.007	GO:1904949	B2Y__16821_5	group1: disappeard at specific stages	level4
B2Y__17194	biological_process	viral process	4311	0.2183	GO:0016032	B2Y__17194_7	group1: disappeard at specific stages	level4
B2Y__18005	molecular_function	peptidase activity	96	0.0048	GO:0008233	B2Y__18005_5	group1: disappeard at specific stages	level4
B2Y__18005	biological_process	response to temperature stimulus	140	0.007	GO:0009266	B2Y__18005_5	group1: disappeard at specific stages	level4
B2Y__18005	biological_process	response to radiation	108	0.0054	GO:0009314	B2Y__18005_5	group1: disappeard at specific stages	level4
B2Y__18005	biological_process	response to heat	99	0.005	GO:0009408	B2Y__18005_5	group1: disappeard at specific stages	level4
B2Y__18005	molecular_function	hydrolase activity, acting on acid anhydrides	1713	0.0867	GO:0016817	B2Y__18005_5	group1: disappeard at specific stages	level4
B2Y__18005	molecular_function	hydrolase activity, acting on acid phosphorus-nitrogen bonds	15	0.0007	GO:0016825	B2Y__18005_5	group1: disappeard at specific stages	level4
B2Y__18005	biological_process	regulation of metabolic process	467	0.0236	GO:0019222	B2Y__18005_5	group1: disappeard at specific stages	level4
B2Y__18005	biological_process	protein metabolic process	239	0.0121	GO:0019538	B2Y__18005_5	group1: disappeard at specific stages	level4
B2Y__18005	molecular_function	enzyme binding	84	0.0042	GO:0019899	B2Y__18005_5	group1: disappeard at specific stages	level4
B2Y__18005	molecular_function	identical protein binding	443	0.0224	GO:0042802	B2Y__18005_5	group1: disappeard at specific stages	level4
B2Y__18005	biological_process	macromolecule metabolic process	3322	0.1682	GO:0043170	B2Y__18005_5	group1: disappeard at specific stages	level4
B2Y__18005	biological_process	cellular catabolic process	418	0.0211	GO:0044248	B2Y__18005_5	group1: disappeard at specific stages	level4
B2Y__18005	biological_process	cellular macromolecule metabolic process	2995	0.1516	GO:0044260	B2Y__18005_5	group1: disappeard at specific stages	level4
B2Y__18005	biological_process	negative regulation of biological process	554	0.028	GO:0048519	B2Y__18005_5	group1: disappeard at specific stages	level4
B2Y__18005	biological_process	regulation of cellular process	768	0.0388	GO:0050794	B2Y__18005_5	group1: disappeard at specific stages	level4
B2Y__18005	biological_process	organonitrogen compound metabolic process	671	0.0339	GO:1901564	B2Y__18005_5	group1: disappeard at specific stages	level4
B2Y__18005	biological_process	organic substance catabolic process	495	0.025	GO:1901575	B2Y__18005_5	group1: disappeard at specific stages	level4
B2Y__18005	cellular_component	ATPase complex	140	0.007	GO:1904949	B2Y__18005_5	group1: disappeard at specific stages	level4
B2Y__18005	cellular_component	peptidase complex	33	0.0016	GO:1905368	B2Y__18005_5	group1: disappeard at specific stages	level4
B2Y__18159	molecular_function	peptidase activity	96	0.0048	GO:0008233	B2Y__18159_1	group1: disappeard at specific stages	level4
B2Y__18159	biological_process	protein metabolic process	239	0.0121	GO:0019538	B2Y__18159_1	group1: disappeard at specific stages	level4
B2Y__18159	biological_process	cellular nitrogen compound metabolic process	3572	0.1809	GO:0034641	B2Y__18159_1	group1: disappeard at specific stages	level4
B2Y__18159	molecular_function	cation binding	645	0.0326	GO:0043169	B2Y__18159_1	group1: disappeard at specific stages	level4
B2Y__18159	biological_process	macromolecule metabolic process	3322	0.1682	GO:0043170	B2Y__18159_1	group1: disappeard at specific stages	level4
B2Y__18159	biological_process	cellular catabolic process	418	0.0211	GO:0044248	B2Y__18159_1	group1: disappeard at specific stages	level4
B2Y__18159	biological_process	organonitrogen compound metabolic process	671	0.0339	GO:1901564	B2Y__18159_1	group1: disappeard at specific stages	level4
B2Y__18159	biological_process	organic substance catabolic process	495	0.025	GO:1901575	B2Y__18159_1	group1: disappeard at specific stages	level4
B2Y__19764	cellular_component	host cell part	1347	0.0682	GO:0033643	B2Y__19764_3	group1: disappeard at specific stages	level4
B2Y__19764	cellular_component	host cell	1348	0.0682	GO:0043657	B2Y__19764_3	group1: disappeard at specific stages	level4
B2Y__20414	molecular_function	DNA helicase activity	130	0.0065	GO:0003678	B2Y__20414_15	group1: disappeard at specific stages	level4
B2Y__20414	biological_process	nucleobase-containing compound metabolic process	3510	0.1777	GO:0006139	B2Y__20414_15	group1: disappeard at specific stages	level4
B2Y__20414	biological_process	cellular aromatic compound metabolic process	3530	0.1787	GO:0006725	B2Y__20414_15	group1: disappeard at specific stages	level4
B2Y__20414	biological_process	cellular component organization	509	0.0257	GO:0016043	B2Y__20414_15	group1: disappeard at specific stages	level4
B2Y__20414	molecular_function	hydrolase activity, acting on acid anhydrides	1713	0.0867	GO:0016817	B2Y__20414_15	group1: disappeard at specific stages	level4
B2Y__20414	biological_process	cellular nitrogen compound metabolic process	3572	0.1809	GO:0034641	B2Y__20414_15	group1: disappeard at specific stages	level4
B2Y__20414	biological_process	macromolecule metabolic process	3322	0.1682	GO:0043170	B2Y__20414_15	group1: disappeard at specific stages	level4
B2Y__20414	biological_process	cellular biosynthetic process	2795	0.1415	GO:0044249	B2Y__20414_15	group1: disappeard at specific stages	level4
B2Y__20414	biological_process	cellular macromolecule metabolic process	2995	0.1516	GO:0044260	B2Y__20414_15	group1: disappeard at specific stages	level4
B2Y__20414	biological_process	heterocycle metabolic process	3530	0.1787	GO:0046483	B2Y__20414_15	group1: disappeard at specific stages	level4
B2Y__20414	biological_process	organic cyclic compound metabolic process	3531	0.1788	GO:1901360	B2Y__20414_15	group1: disappeard at specific stages	level4
B2Y__20414	biological_process	organic substance biosynthetic process	2795	0.1415	GO:1901576	B2Y__20414_15	group1: disappeard at specific stages	level4
B2Y__20462	cellular_component	host cell part	1347	0.0682	GO:0033643	B2Y__20462_1	group1: disappeard at specific stages	level4
B2Y__20462	cellular_component	host cell	1348	0.0682	GO:0043657	B2Y__20462_1	group1: disappeard at specific stages	level4
B2Y__20599	molecular_function	identical protein binding	443	0.0224	GO:0042802	B2Y__20599_8	group1: disappeard at specific stages	level4
B2Y__21824	molecular_function	nucleic acid binding	1291	0.0653	GO:0003676	B2Y__21824_7	group1: disappeard at specific stages	level4
B2Y__21824	molecular_function	lysozyme activity	213	0.0107	GO:0003796	B2Y__21824_4	group1: disappeard at specific stages	level4
B2Y__21824	molecular_function	deoxyribonuclease activity	145	0.0073	GO:0004536	B2Y__21824_7	group1: disappeard at specific stages	level4
B2Y__21824	biological_process	nucleobase-containing compound metabolic process	3510	0.1777	GO:0006139	B2Y__21824_7	group1: disappeard at specific stages	level4
B2Y__21824	biological_process	cellular aromatic compound metabolic process	3530	0.1787	GO:0006725	B2Y__21824_7	group1: disappeard at specific stages	level4
B2Y__21824	molecular_function	peptidase activity	96	0.0048	GO:0008233	B2Y__21824_7	group1: disappeard at specific stages	level4
B2Y__21824	molecular_function	integrase activity	69	0.0034	GO:0008907	B2Y__21824_7	group1: disappeard at specific stages	level4
B2Y__21824	biological_process	viral process	4311	0.2183	GO:0016032	B2Y__21824_7	group1: disappeard at specific stages	level4
B2Y__21824	molecular_function	transferase activity, transferring phosphorus-containing groups	1843	0.0933	GO:0016772	B2Y__21824_7	group1: disappeard at specific stages	level4
B2Y__21824	molecular_function	hydrolase activity, acting on ester bonds	1071	0.0542	GO:0016788	B2Y__21824_7	group1: disappeard at specific stages	level4
B2Y__21824	molecular_function	hydrolase activity, acting on glycosyl bonds	307	0.0155	GO:0016798	B2Y__21824_4	group1: disappeard at specific stages	level4
B2Y__21824	biological_process	regulation of metabolic process	467	0.0236	GO:0019222	B2Y__21824_7	group1: disappeard at specific stages	level4
B2Y__21824	biological_process	protein metabolic process	239	0.0121	GO:0019538	B2Y__21824_7	group1: disappeard at specific stages	level4
B2Y__21824	cellular_component	host cell part	1347	0.0682	GO:0033643	B2Y__21824_7	group1: disappeard at specific stages	level4
B2Y__21824	molecular_function	DNA polymerase activity	1699	0.086	GO:0034061	B2Y__21824_7	group1: disappeard at specific stages	level4
B2Y__21824	biological_process	cellular nitrogen compound metabolic process	3572	0.1809	GO:0034641	B2Y__21824_7	group1: disappeard at specific stages	level4
B2Y__21824	molecular_function	identical protein binding	443	0.0224	GO:0042802	B2Y__21824_7	group1: disappeard at specific stages	level4
B2Y__21824	biological_process	macromolecule metabolic process	3322	0.1682	GO:0043170	B2Y__21824_7	group1: disappeard at specific stages	level4
B2Y__21824	cellular_component	host cell	1348	0.0682	GO:0043657	B2Y__21824_7	group1: disappeard at specific stages	level4
B2Y__21824	biological_process	cellular catabolic process	418	0.0211	GO:0044248	B2Y__21824_7	group1: disappeard at specific stages	level4
B2Y__21824	biological_process	cellular biosynthetic process	2795	0.1415	GO:0044249	B2Y__21824_7	group1: disappeard at specific stages	level4
B2Y__21824	biological_process	cellular macromolecule metabolic process	2995	0.1516	GO:0044260	B2Y__21824_7	group1: disappeard at specific stages	level4
B2Y__21824	biological_process	heterocycle metabolic process	3530	0.1787	GO:0046483	B2Y__21824_7	group1: disappeard at specific stages	level4
B2Y__21824	biological_process	regulation of cellular process	768	0.0388	GO:0050794	B2Y__21824_7	group1: disappeard at specific stages	level4
B2Y__21824	biological_process	organic cyclic compound metabolic process	3531	0.1788	GO:1901360	B2Y__21824_7	group1: disappeard at specific stages	level4
B2Y__21824	biological_process	organonitrogen compound metabolic process	671	0.0339	GO:1901564	B2Y__21824_7	group1: disappeard at specific stages	level4
B2Y__21824	biological_process	organic substance catabolic process	495	0.025	GO:1901575	B2Y__21824_7	group1: disappeard at specific stages	level4
B2Y__21824	biological_process	organic substance biosynthetic process	2795	0.1415	GO:1901576	B2Y__21824_7	group1: disappeard at specific stages	level4
B2Y__21889	biological_process	viral process	4311	0.2183	GO:0016032	B2Y__21889_2	group1: disappeard at specific stages	level4
B2Y__22024	molecular_function	DNA ligase activity	97	0.0049	GO:0003909	B2Y__22024_7	group1: disappeard at specific stages	level4
B2Y__22024	biological_process	nucleobase-containing compound metabolic process	3510	0.1777	GO:0006139	B2Y__22024_7	group1: disappeard at specific stages	level4
B2Y__22024	biological_process	cellular aromatic compound metabolic process	3530	0.1787	GO:0006725	B2Y__22024_7	group1: disappeard at specific stages	level4
B2Y__22024	molecular_function	ligase activity, forming phosphoric ester bonds	101	0.0051	GO:0016886	B2Y__22024_7	group1: disappeard at specific stages	level4
B2Y__22024	biological_process	cellular response to stress	530	0.0268	GO:0033554	B2Y__22024_7	group1: disappeard at specific stages	level4
B2Y__22024	biological_process	cellular nitrogen compound metabolic process	3572	0.1809	GO:0034641	B2Y__22024_7	group1: disappeard at specific stages	level4
B2Y__22024	biological_process	macromolecule metabolic process	3322	0.1682	GO:0043170	B2Y__22024_7	group1: disappeard at specific stages	level4
B2Y__22024	biological_process	cellular biosynthetic process	2795	0.1415	GO:0044249	B2Y__22024_7	group1: disappeard at specific stages	level4
B2Y__22024	biological_process	cellular macromolecule metabolic process	2995	0.1516	GO:0044260	B2Y__22024_7	group1: disappeard at specific stages	level4
B2Y__22024	biological_process	heterocycle metabolic process	3530	0.1787	GO:0046483	B2Y__22024_7	group1: disappeard at specific stages	level4
B2Y__22024	biological_process	organic cyclic compound metabolic process	3531	0.1788	GO:1901360	B2Y__22024_7	group1: disappeard at specific stages	level4
B2Y__22024	biological_process	organic substance biosynthetic process	2795	0.1415	GO:1901576	B2Y__22024_7	group1: disappeard at specific stages	level4
B2Y__23656	biological_process	nucleobase-containing compound metabolic process	3510	0.1777	GO:0006139	B2Y__23656_5	group1: disappeard at specific stages	level4
B2Y__23656	biological_process	cellular aromatic compound metabolic process	3530	0.1787	GO:0006725	B2Y__23656_5	group1: disappeard at specific stages	level4
B2Y__23656	biological_process	viral process	4311	0.2183	GO:0016032	B2Y__23656_5	group1: disappeard at specific stages	level4
B2Y__23656	molecular_function	transferase activity, transferring phosphorus-containing groups	1843	0.0933	GO:0016772	B2Y__23656_5	group1: disappeard at specific stages	level4
B2Y__23656	molecular_function	DNA polymerase activity	1699	0.086	GO:0034061	B2Y__23656_5	group1: disappeard at specific stages	level4
B2Y__23656	biological_process	cellular nitrogen compound metabolic process	3572	0.1809	GO:0034641	B2Y__23656_5	group1: disappeard at specific stages	level4
B2Y__23656	biological_process	macromolecule metabolic process	3322	0.1682	GO:0043170	B2Y__23656_5	group1: disappeard at specific stages	level4
B2Y__23656	biological_process	cellular biosynthetic process	2795	0.1415	GO:0044249	B2Y__23656_5	group1: disappeard at specific stages	level4
B2Y__23656	biological_process	cellular macromolecule metabolic process	2995	0.1516	GO:0044260	B2Y__23656_5	group1: disappeard at specific stages	level4
B2Y__23656	biological_process	heterocycle metabolic process	3530	0.1787	GO:0046483	B2Y__23656_5	group1: disappeard at specific stages	level4
B2Y__23656	biological_process	organic cyclic compound metabolic process	3531	0.1788	GO:1901360	B2Y__23656_5	group1: disappeard at specific stages	level4
B2Y__23656	biological_process	organic substance biosynthetic process	2795	0.1415	GO:1901576	B2Y__23656_5	group1: disappeard at specific stages	level4
B2Y__25385	molecular_function	deoxyribonuclease activity	145	0.0073	GO:0004536	B2Y__25385_7	group1: disappeard at specific stages	level4
B2Y__25385	biological_process	nucleobase-containing compound metabolic process	3510	0.1777	GO:0006139	B2Y__25385_7	group1: disappeard at specific stages	level4
B2Y__25385	biological_process	cellular aromatic compound metabolic process	3530	0.1787	GO:0006725	B2Y__25385_7	group1: disappeard at specific stages	level4
B2Y__25385	molecular_function	hydrolase activity, acting on ester bonds	1071	0.0542	GO:0016788	B2Y__25385_7	group1: disappeard at specific stages	level4
B2Y__25385	biological_process	cellular nitrogen compound metabolic process	3572	0.1809	GO:0034641	B2Y__25385_7	group1: disappeard at specific stages	level4
B2Y__25385	biological_process	macromolecule metabolic process	3322	0.1682	GO:0043170	B2Y__25385_7	group1: disappeard at specific stages	level4
B2Y__25385	biological_process	cellular macromolecule metabolic process	2995	0.1516	GO:0044260	B2Y__25385_7	group1: disappeard at specific stages	level4
B2Y__25385	biological_process	heterocycle metabolic process	3530	0.1787	GO:0046483	B2Y__25385_7	group1: disappeard at specific stages	level4
B2Y__25385	biological_process	organic cyclic compound metabolic process	3531	0.1788	GO:1901360	B2Y__25385_7	group1: disappeard at specific stages	level4
B2Y__26188	biological_process	nucleobase-containing compound metabolic process	3510	0.1777	GO:0006139	B2Y__26188_8	group1: disappeard at specific stages	level4
B2Y__26188	biological_process	cellular aromatic compound metabolic process	3530	0.1787	GO:0006725	B2Y__26188_8	group1: disappeard at specific stages	level4
B2Y__26188	biological_process	viral process	4311	0.2183	GO:0016032	B2Y__26188_3	group1: disappeard at specific stages	level4
B2Y__26188	biological_process	viral process	4311	0.2183	GO:0016032	B2Y__26188_8	group1: disappeard at specific stages	level4
B2Y__26188	molecular_function	transferase activity, transferring phosphorus-containing groups	1843	0.0933	GO:0016772	B2Y__26188_8	group1: disappeard at specific stages	level4
B2Y__26188	molecular_function	DNA polymerase activity	1699	0.086	GO:0034061	B2Y__26188_8	group1: disappeard at specific stages	level4
B2Y__26188	biological_process	cellular nitrogen compound metabolic process	3572	0.1809	GO:0034641	B2Y__26188_8	group1: disappeard at specific stages	level4
B2Y__26188	biological_process	macromolecule metabolic process	3322	0.1682	GO:0043170	B2Y__26188_8	group1: disappeard at specific stages	level4
B2Y__26188	biological_process	cellular biosynthetic process	2795	0.1415	GO:0044249	B2Y__26188_8	group1: disappeard at specific stages	level4
B2Y__26188	biological_process	cellular macromolecule metabolic process	2995	0.1516	GO:0044260	B2Y__26188_8	group1: disappeard at specific stages	level4
B2Y__26188	biological_process	heterocycle metabolic process	3530	0.1787	GO:0046483	B2Y__26188_8	group1: disappeard at specific stages	level4
B2Y__26188	biological_process	organic cyclic compound metabolic process	3531	0.1788	GO:1901360	B2Y__26188_8	group1: disappeard at specific stages	level4
B2Y__26188	biological_process	organic substance biosynthetic process	2795	0.1415	GO:1901576	B2Y__26188_8	group1: disappeard at specific stages	level4
B2Y__27067	biological_process	viral process	4311	0.2183	GO:0016032	B2Y__27067_2	group1: disappeard at specific stages	level4
B2Y__28255	cellular_component	host cell part	1347	0.0682	GO:0033643	B2Y__28255_1	group1: disappeard at specific stages	level4
B2Y__28255	cellular_component	host cell	1348	0.0682	GO:0043657	B2Y__28255_1	group1: disappeard at specific stages	level4
B2Y__32464	biological_process	viral process	4311	0.2183	GO:0016032	B2Y__32464_4	group1: disappeard at specific stages	level4
B2Y__32464	biological_process	interaction with host	589	0.0298	GO:0051701	B2Y__32464_4	group1: disappeard at specific stages	level4
B2Y__34112	biological_process	nucleobase-containing compound metabolic process	3510	0.1777	GO:0006139	B2Y__34112_6	group1: disappeard at specific stages	level4
B2Y__34112	biological_process	cellular aromatic compound metabolic process	3530	0.1787	GO:0006725	B2Y__34112_6	group1: disappeard at specific stages	level4
B2Y__34112	biological_process	phosphorus metabolic process	512	0.0259	GO:0006793	B2Y__34112_6	group1: disappeard at specific stages	level4
B2Y__34112	biological_process	cellular component organization	509	0.0257	GO:0016043	B2Y__34112_6	group1: disappeard at specific stages	level4
B2Y__34112	molecular_function	hydrolase activity, acting on acid anhydrides	1713	0.0867	GO:0016817	B2Y__34112_6	group1: disappeard at specific stages	level4
B2Y__34112	biological_process	organophosphate metabolic process	466	0.0236	GO:0019637	B2Y__34112_6	group1: disappeard at specific stages	level4
B2Y__34112	biological_process	cellular nitrogen compound metabolic process	3572	0.1809	GO:0034641	B2Y__34112_6	group1: disappeard at specific stages	level4
B2Y__34112	molecular_function	cation binding	645	0.0326	GO:0043169	B2Y__34112_6	group1: disappeard at specific stages	level4
B2Y__34112	biological_process	cellular component biogenesis	182	0.0092	GO:0044085	B2Y__34112_6	group1: disappeard at specific stages	level4
B2Y__34112	biological_process	cellular catabolic process	418	0.0211	GO:0044248	B2Y__34112_6	group1: disappeard at specific stages	level4
B2Y__34112	biological_process	cellular biosynthetic process	2795	0.1415	GO:0044249	B2Y__34112_6	group1: disappeard at specific stages	level4
B2Y__34112	biological_process	small molecule biosynthetic process	314	0.0159	GO:0044283	B2Y__34112_6	group1: disappeard at specific stages	level4
B2Y__34112	biological_process	heterocycle metabolic process	3530	0.1787	GO:0046483	B2Y__34112_6	group1: disappeard at specific stages	level4
B2Y__34112	biological_process	nucleobase-containing small molecule metabolic process	469	0.0237	GO:0055086	B2Y__34112_6	group1: disappeard at specific stages	level4
B2Y__34112	biological_process	carbohydrate derivative metabolic process	537	0.0271	GO:1901135	B2Y__34112_6	group1: disappeard at specific stages	level4
B2Y__34112	biological_process	organic cyclic compound metabolic process	3531	0.1788	GO:1901360	B2Y__34112_6	group1: disappeard at specific stages	level4
B2Y__34112	biological_process	organonitrogen compound metabolic process	671	0.0339	GO:1901564	B2Y__34112_6	group1: disappeard at specific stages	level4
B2Y__34112	biological_process	organic substance catabolic process	495	0.025	GO:1901575	B2Y__34112_6	group1: disappeard at specific stages	level4
B2Y__34112	biological_process	organic substance biosynthetic process	2795	0.1415	GO:1901576	B2Y__34112_6	group1: disappeard at specific stages	level4
B2Y__35314	molecular_function	ribonuclease activity	301	0.0152	GO:0004540	B2Y__35314_2	group1: disappeard at specific stages	level4
B2Y__35314	biological_process	nucleobase-containing compound metabolic process	3510	0.1777	GO:0006139	B2Y__35314_2	group1: disappeard at specific stages	level4
B2Y__35314	biological_process	cellular aromatic compound metabolic process	3530	0.1787	GO:0006725	B2Y__35314_2	group1: disappeard at specific stages	level4
B2Y__35314	biological_process	viral process	4311	0.2183	GO:0016032	B2Y__35314_2	group1: disappeard at specific stages	level4
B2Y__35314	molecular_function	transferase activity, transferring phosphorus-containing groups	1843	0.0933	GO:0016772	B2Y__35314_2	group1: disappeard at specific stages	level4
B2Y__35314	molecular_function	hydrolase activity, acting on ester bonds	1071	0.0542	GO:0016788	B2Y__35314_2	group1: disappeard at specific stages	level4
B2Y__35314	cellular_component	host cell part	1347	0.0682	GO:0033643	B2Y__35314_2	group1: disappeard at specific stages	level4
B2Y__35314	molecular_function	DNA polymerase activity	1699	0.086	GO:0034061	B2Y__35314_2	group1: disappeard at specific stages	level4
B2Y__35314	biological_process	cellular nitrogen compound metabolic process	3572	0.1809	GO:0034641	B2Y__35314_2	group1: disappeard at specific stages	level4
B2Y__35314	biological_process	macromolecule metabolic process	3322	0.1682	GO:0043170	B2Y__35314_2	group1: disappeard at specific stages	level4
B2Y__35314	cellular_component	host cell	1348	0.0682	GO:0043657	B2Y__35314_2	group1: disappeard at specific stages	level4
B2Y__35314	biological_process	cellular biosynthetic process	2795	0.1415	GO:0044249	B2Y__35314_2	group1: disappeard at specific stages	level4
B2Y__35314	biological_process	cellular macromolecule metabolic process	2995	0.1516	GO:0044260	B2Y__35314_2	group1: disappeard at specific stages	level4
B2Y__35314	biological_process	heterocycle metabolic process	3530	0.1787	GO:0046483	B2Y__35314_2	group1: disappeard at specific stages	level4
B2Y__35314	biological_process	organic cyclic compound metabolic process	3531	0.1788	GO:1901360	B2Y__35314_2	group1: disappeard at specific stages	level4
B2Y__35314	biological_process	organic substance biosynthetic process	2795	0.1415	GO:1901576	B2Y__35314_2	group1: disappeard at specific stages	level4
B2Y__35314	biological_process	response to salt	222	0.0112	GO:1902074	B2Y__35314_2	group1: disappeard at specific stages	level4
B2Y__36737	biological_process	viral process	4311	0.2183	GO:0016032	B2Y__36737_2	group1: disappeard at specific stages	level4
B2Y__37109	molecular_function	DNA-binding transcription factor activity, RNA polymerase II-specific	170	0.0086	GO:0000981	B2Y__37109_5	group1: disappeard at specific stages	level4
B2Y__37109	molecular_function	DNA-binding transcription repressor activity	170	0.0086	GO:0001217	B2Y__37109_5	group1: disappeard at specific stages	level4
B2Y__37109	molecular_function	nucleic acid binding	1291	0.0653	GO:0003676	B2Y__37109_5	group1: disappeard at specific stages	level4
B2Y__37109	biological_process	nucleobase-containing compound metabolic process	3510	0.1777	GO:0006139	B2Y__37109_5	group1: disappeard at specific stages	level4
B2Y__37109	biological_process	cellular aromatic compound metabolic process	3530	0.1787	GO:0006725	B2Y__37109_5	group1: disappeard at specific stages	level4
B2Y__37109	biological_process	response to inorganic substance	243	0.0123	GO:0010035	B2Y__37109_5	group1: disappeard at specific stages	level4
B2Y__37109	molecular_function	hydrolase activity, acting on ester bonds	1071	0.0542	GO:0016788	B2Y__37109_5	group1: disappeard at specific stages	level4
B2Y__37109	cellular_component	transcription repressor complex	170	0.0086	GO:0017053	B2Y__37109_5	group1: disappeard at specific stages	level4
B2Y__37109	biological_process	regulation of metabolic process	467	0.0236	GO:0019222	B2Y__37109_5	group1: disappeard at specific stages	level4
B2Y__37109	biological_process	cellular nitrogen compound metabolic process	3572	0.1809	GO:0034641	B2Y__37109_5	group1: disappeard at specific stages	level4
B2Y__37109	molecular_function	cation binding	645	0.0326	GO:0043169	B2Y__37109_5	group1: disappeard at specific stages	level4
B2Y__37109	biological_process	macromolecule metabolic process	3322	0.1682	GO:0043170	B2Y__37109_5	group1: disappeard at specific stages	level4
B2Y__37109	biological_process	heterocycle metabolic process	3530	0.1787	GO:0046483	B2Y__37109_5	group1: disappeard at specific stages	level4
B2Y__37109	biological_process	negative regulation of biological process	554	0.028	GO:0048519	B2Y__37109_5	group1: disappeard at specific stages	level4
B2Y__37109	biological_process	regulation of cellular process	768	0.0388	GO:0050794	B2Y__37109_5	group1: disappeard at specific stages	level4
B2Y__37109	biological_process	cellular response to chemical stimulus	264	0.0133	GO:0070887	B2Y__37109_5	group1: disappeard at specific stages	level4
B2Y__37109	biological_process	organic cyclic compound metabolic process	3531	0.1788	GO:1901360	B2Y__37109_5	group1: disappeard at specific stages	level4
B2Y__38427	molecular_function	lysozyme activity	213	0.0107	GO:0003796	B2Y__38427_4	group1: disappeard at specific stages	level4
B2Y__38427	biological_process	carbohydrate metabolic process	92	0.0046	GO:0005975	B2Y__38427_4	group1: disappeard at specific stages	level4
B2Y__38427	molecular_function	lytic transglycosylase activity	50	0.0025	GO:0008933	B2Y__38427_4	group1: disappeard at specific stages	level4
B2Y__38427	biological_process	response to bacterium	104	0.0052	GO:0009617	B2Y__38427_4	group1: disappeard at specific stages	level4
B2Y__38427	biological_process	viral process	4311	0.2183	GO:0016032	B2Y__38427_4	group1: disappeard at specific stages	level4
B2Y__38427	molecular_function	transferase activity, transferring glycosyl groups	55	0.0027	GO:0016757	B2Y__38427_4	group1: disappeard at specific stages	level4
B2Y__38427	molecular_function	hydrolase activity, acting on glycosyl bonds	307	0.0155	GO:0016798	B2Y__38427_4	group1: disappeard at specific stages	level4
B2Y__38427	biological_process	macromolecule metabolic process	3322	0.1682	GO:0043170	B2Y__38427_4	group1: disappeard at specific stages	level4
B2Y__38427	biological_process	response to external biotic stimulus	186	0.0094	GO:0043207	B2Y__38427_4	group1: disappeard at specific stages	level4
B2Y__38427	biological_process	multi-organism catabolic process	78	0.0039	GO:0044035	B2Y__38427_4	group1: disappeard at specific stages	level4
B2Y__38427	biological_process	multi-organism carbohydrate metabolic process	78	0.0039	GO:0044040	B2Y__38427_4	group1: disappeard at specific stages	level4
B2Y__38427	biological_process	cell wall disruption in other organism	78	0.0039	GO:0044278	B2Y__38427_4	group1: disappeard at specific stages	level4
B2Y__38427	biological_process	disruption of cells of other organism	86	0.0043	GO:0044364	B2Y__38427_4	group1: disappeard at specific stages	level4
B2Y__38427	biological_process	interaction with host	589	0.0298	GO:0051701	B2Y__38427_4	group1: disappeard at specific stages	level4
B2Y__38427	biological_process	modulation of process of other organism involved in symbiotic interaction	168	0.0085	GO:0051817	B2Y__38427_4	group1: disappeard at specific stages	level4
B2Y__38427	biological_process	killing of cells in other organism involved in symbiotic interaction	86	0.0043	GO:0051883	B2Y__38427_4	group1: disappeard at specific stages	level4
B2Y__38427	biological_process	carbohydrate derivative metabolic process	537	0.0271	GO:1901135	B2Y__38427_4	group1: disappeard at specific stages	level4
B2Y__38427	biological_process	organonitrogen compound metabolic process	671	0.0339	GO:1901564	B2Y__38427_4	group1: disappeard at specific stages	level4
B2Y__38427	biological_process	organic substance catabolic process	495	0.025	GO:1901575	B2Y__38427_4	group1: disappeard at specific stages	level4
B2Y__38471	biological_process	nucleobase-containing compound metabolic process	3510	0.1777	GO:0006139	B2Y__38471_1	group1: disappeard at specific stages	level4
B2Y__38471	biological_process	cellular aromatic compound metabolic process	3530	0.1787	GO:0006725	B2Y__38471_1	group1: disappeard at specific stages	level4
B2Y__38471	biological_process	viral process	4311	0.2183	GO:0016032	B2Y__38471_1	group1: disappeard at specific stages	level4
B2Y__38471	molecular_function	transferase activity, transferring phosphorus-containing groups	1843	0.0933	GO:0016772	B2Y__38471_1	group1: disappeard at specific stages	level4
B2Y__38471	molecular_function	DNA polymerase activity	1699	0.086	GO:0034061	B2Y__38471_1	group1: disappeard at specific stages	level4
B2Y__38471	biological_process	cellular nitrogen compound metabolic process	3572	0.1809	GO:0034641	B2Y__38471_1	group1: disappeard at specific stages	level4
B2Y__38471	biological_process	macromolecule metabolic process	3322	0.1682	GO:0043170	B2Y__38471_1	group1: disappeard at specific stages	level4
B2Y__38471	biological_process	cellular biosynthetic process	2795	0.1415	GO:0044249	B2Y__38471_1	group1: disappeard at specific stages	level4
B2Y__38471	biological_process	cellular macromolecule metabolic process	2995	0.1516	GO:0044260	B2Y__38471_1	group1: disappeard at specific stages	level4
B2Y__38471	biological_process	heterocycle metabolic process	3530	0.1787	GO:0046483	B2Y__38471_1	group1: disappeard at specific stages	level4
B2Y__38471	biological_process	organic cyclic compound metabolic process	3531	0.1788	GO:1901360	B2Y__38471_1	group1: disappeard at specific stages	level4
B2Y__38471	biological_process	organic substance biosynthetic process	2795	0.1415	GO:1901576	B2Y__38471_1	group1: disappeard at specific stages	level4
B2Y__41528	biological_process	nucleobase-containing compound metabolic process	3510	0.1777	GO:0006139	B2Y__41528_2	group1: disappeard at specific stages	level4
B2Y__41528	biological_process	cellular aromatic compound metabolic process	3530	0.1787	GO:0006725	B2Y__41528_2	group1: disappeard at specific stages	level4
B2Y__41528	biological_process	viral process	4311	0.2183	GO:0016032	B2Y__41528_2	group1: disappeard at specific stages	level4
B2Y__41528	molecular_function	transferase activity, transferring phosphorus-containing groups	1843	0.0933	GO:0016772	B2Y__41528_2	group1: disappeard at specific stages	level4
B2Y__41528	molecular_function	DNA polymerase activity	1699	0.086	GO:0034061	B2Y__41528_2	group1: disappeard at specific stages	level4
B2Y__41528	biological_process	cellular nitrogen compound metabolic process	3572	0.1809	GO:0034641	B2Y__41528_2	group1: disappeard at specific stages	level4
B2Y__41528	biological_process	macromolecule metabolic process	3322	0.1682	GO:0043170	B2Y__41528_2	group1: disappeard at specific stages	level4
B2Y__41528	biological_process	cellular biosynthetic process	2795	0.1415	GO:0044249	B2Y__41528_2	group1: disappeard at specific stages	level4
B2Y__41528	biological_process	cellular macromolecule metabolic process	2995	0.1516	GO:0044260	B2Y__41528_2	group1: disappeard at specific stages	level4
B2Y__41528	biological_process	heterocycle metabolic process	3530	0.1787	GO:0046483	B2Y__41528_2	group1: disappeard at specific stages	level4
B2Y__41528	biological_process	organic cyclic compound metabolic process	3531	0.1788	GO:1901360	B2Y__41528_2	group1: disappeard at specific stages	level4
B2Y__41528	biological_process	organic substance biosynthetic process	2795	0.1415	GO:1901576	B2Y__41528_2	group1: disappeard at specific stages	level4
B2Y__41680	molecular_function	identical protein binding	443	0.0224	GO:0042802	B2Y__41680_1	group1: disappeard at specific stages	level4
B2Y__43183	biological_process	viral process	4311	0.2183	GO:0016032	B2Y__43183_2	group1: disappeard at specific stages	level4
B2Y__44602	biological_process	nucleobase-containing compound metabolic process	3510	0.1777	GO:0006139	B2Y__44602_4	group1: disappeard at specific stages	level4
B2Y__44602	biological_process	cellular aromatic compound metabolic process	3530	0.1787	GO:0006725	B2Y__44602_4	group1: disappeard at specific stages	level4
B2Y__44602	biological_process	cellular nitrogen compound metabolic process	3572	0.1809	GO:0034641	B2Y__44602_4	group1: disappeard at specific stages	level4
B2Y__44602	biological_process	macromolecule metabolic process	3322	0.1682	GO:0043170	B2Y__44602_4	group1: disappeard at specific stages	level4
B2Y__44602	biological_process	cellular macromolecule metabolic process	2995	0.1516	GO:0044260	B2Y__44602_4	group1: disappeard at specific stages	level4
B2Y__44602	biological_process	heterocycle metabolic process	3530	0.1787	GO:0046483	B2Y__44602_4	group1: disappeard at specific stages	level4
B2Y__44602	biological_process	organic cyclic compound metabolic process	3531	0.1788	GO:1901360	B2Y__44602_4	group1: disappeard at specific stages	level4
B2Y__45881	molecular_function	identical protein binding	443	0.0224	GO:0042802	B2Y__45881_6	group1: disappeard at specific stages	level4
B2Y__48733	cellular_component	icosahedral viral capsid	296	0.0149	GO:0019030	B2Y__48733_7	group1: disappeard at specific stages	level4
B2Y__50260	molecular_function	nucleic acid binding	1291	0.0653	GO:0003676	B2Y__50260_3	group1: disappeard at specific stages	level4
B2Y__50260	cellular_component	plasma membrane	344	0.0174	GO:0005886	B2Y__50260_3	group1: disappeard at specific stages	level4
B2Y__50260	biological_process	cellular response to stress	530	0.0268	GO:0033554	B2Y__50260_3	group1: disappeard at specific stages	level4
B2Y__50260	biological_process	response to antibiotic	27	0.0013	GO:0046677	B2Y__50260_3	group1: disappeard at specific stages	level4
B2Y__50492	cellular_component	host cell part	1347	0.0682	GO:0033643	B2Y__50492_1	group1: disappeard at specific stages	level4
B2Y__50492	cellular_component	host cell	1348	0.0682	GO:0043657	B2Y__50492_1	group1: disappeard at specific stages	level4
B2Y__51104	cellular_component	host cell part	1347	0.0682	GO:0033643	B2Y__51104_7	group1: disappeard at specific stages	level4
B2Y__51104	cellular_component	host cell	1348	0.0682	GO:0043657	B2Y__51104_7	group1: disappeard at specific stages	level4
B2Y__51425	cellular_component	outer membrane-bounded periplasmic space	12	0.0006	GO:0030288	B2Y__51425_8	group1: disappeard at specific stages	level4
B2Y__51425	cellular_component	cell envelope	136	0.0068	GO:0030313	B2Y__51425_8	group1: disappeard at specific stages	level4
B2Y__5151	molecular_function	hydrolase activity, acting on acid anhydrides	1713	0.0867	GO:0016817	B2Y__5151_3	group1: disappeard at specific stages	level4
B2Y__51617	cellular_component	host cell part	1347	0.0682	GO:0033643	B2Y__51617_1	group1: disappeard at specific stages	level4
B2Y__51617	cellular_component	host cell	1348	0.0682	GO:0043657	B2Y__51617_1	group1: disappeard at specific stages	level4
B2Y__52920	molecular_function	deoxyribonuclease activity	145	0.0073	GO:0004536	B2Y__52920_1	group1: disappeard at specific stages	level4
B2Y__52920	biological_process	nucleobase-containing compound metabolic process	3510	0.1777	GO:0006139	B2Y__52920_1	group1: disappeard at specific stages	level4
B2Y__52920	biological_process	cellular aromatic compound metabolic process	3530	0.1787	GO:0006725	B2Y__52920_1	group1: disappeard at specific stages	level4
B2Y__52920	molecular_function	hydrolase activity, acting on ester bonds	1071	0.0542	GO:0016788	B2Y__52920_1	group1: disappeard at specific stages	level4
B2Y__52920	biological_process	cellular nitrogen compound metabolic process	3572	0.1809	GO:0034641	B2Y__52920_1	group1: disappeard at specific stages	level4
B2Y__52920	biological_process	macromolecule metabolic process	3322	0.1682	GO:0043170	B2Y__52920_1	group1: disappeard at specific stages	level4
B2Y__52920	biological_process	cellular macromolecule metabolic process	2995	0.1516	GO:0044260	B2Y__52920_1	group1: disappeard at specific stages	level4
B2Y__52920	biological_process	heterocycle metabolic process	3530	0.1787	GO:0046483	B2Y__52920_1	group1: disappeard at specific stages	level4
B2Y__52920	biological_process	organic cyclic compound metabolic process	3531	0.1788	GO:1901360	B2Y__52920_1	group1: disappeard at specific stages	level4
B2Y__52956	biological_process	viral process	4311	0.2183	GO:0016032	B2Y__52956_1	group1: disappeard at specific stages	level4
B2Y__52956	molecular_function	hydrolase activity, acting on glycosyl bonds	307	0.0155	GO:0016798	B2Y__52956_1	group1: disappeard at specific stages	level4
B2Y__52956	biological_process	response to external biotic stimulus	186	0.0094	GO:0043207	B2Y__52956_1	group1: disappeard at specific stages	level4
B2Y__52956	biological_process	adhesion of symbiont to host cell	394	0.0199	GO:0044650	B2Y__52956_1	group1: disappeard at specific stages	level4
B2Y__52956	biological_process	interaction with host	589	0.0298	GO:0051701	B2Y__52956_1	group1: disappeard at specific stages	level4
B2Y__52956	biological_process	modulation of process of other organism involved in symbiotic interaction	168	0.0085	GO:0051817	B2Y__52956_1	group1: disappeard at specific stages	level4
B2Y__52956	biological_process	response to defenses of other organism	62	0.0031	GO:0052173	B2Y__52956_1	group1: disappeard at specific stages	level4
B2Y__52956	biological_process	response to host	62	0.0031	GO:0075136	B2Y__52956_1	group1: disappeard at specific stages	level4
B2Y__5298	biological_process	interaction with host	589	0.0298	GO:0051701	B2Y__5298_1	group1: disappeard at specific stages	level4
B2Y__54460	cellular_component	host cell part	1347	0.0682	GO:0033643	B2Y__54460_1	group1: disappeard at specific stages	level4
B2Y__54460	cellular_component	host cell	1348	0.0682	GO:0043657	B2Y__54460_1	group1: disappeard at specific stages	level4
B2Y__55936	cellular_component	icosahedral viral capsid	296	0.0149	GO:0019030	B2Y__55936_6	group1: disappeard at specific stages	level4
B2Y__56380	biological_process	nucleobase-containing compound metabolic process	3510	0.1777	GO:0006139	B2Y__56380_6	group1: disappeard at specific stages	level4
B2Y__56380	biological_process	cellular aromatic compound metabolic process	3530	0.1787	GO:0006725	B2Y__56380_6	group1: disappeard at specific stages	level4
B2Y__56380	biological_process	cellular nitrogen compound metabolic process	3572	0.1809	GO:0034641	B2Y__56380_6	group1: disappeard at specific stages	level4
B2Y__56380	biological_process	macromolecule metabolic process	3322	0.1682	GO:0043170	B2Y__56380_6	group1: disappeard at specific stages	level4
B2Y__56380	biological_process	cellular macromolecule metabolic process	2995	0.1516	GO:0044260	B2Y__56380_6	group1: disappeard at specific stages	level4
B2Y__56380	biological_process	heterocycle metabolic process	3530	0.1787	GO:0046483	B2Y__56380_6	group1: disappeard at specific stages	level4
B2Y__56380	biological_process	organic cyclic compound metabolic process	3531	0.1788	GO:1901360	B2Y__56380_6	group1: disappeard at specific stages	level4
B2Y__5665	molecular_function	nucleic acid binding	1291	0.0653	GO:0003676	B2Y__5665_7	group1: disappeard at specific stages	level4
B2Y__5665	molecular_function	deoxyribonuclease activity	145	0.0073	GO:0004536	B2Y__5665_7	group1: disappeard at specific stages	level4
B2Y__5665	biological_process	nucleobase-containing compound metabolic process	3510	0.1777	GO:0006139	B2Y__5665_7	group1: disappeard at specific stages	level4
B2Y__5665	biological_process	cellular aromatic compound metabolic process	3530	0.1787	GO:0006725	B2Y__5665_7	group1: disappeard at specific stages	level4
B2Y__5665	molecular_function	peptidase activity	96	0.0048	GO:0008233	B2Y__5665_7	group1: disappeard at specific stages	level4
B2Y__5665	molecular_function	integrase activity	69	0.0034	GO:0008907	B2Y__5665_7	group1: disappeard at specific stages	level4
B2Y__5665	biological_process	viral process	4311	0.2183	GO:0016032	B2Y__5665_7	group1: disappeard at specific stages	level4
B2Y__5665	molecular_function	transferase activity, transferring phosphorus-containing groups	1843	0.0933	GO:0016772	B2Y__5665_7	group1: disappeard at specific stages	level4
B2Y__5665	molecular_function	hydrolase activity, acting on ester bonds	1071	0.0542	GO:0016788	B2Y__5665_7	group1: disappeard at specific stages	level4
B2Y__5665	biological_process	regulation of metabolic process	467	0.0236	GO:0019222	B2Y__5665_7	group1: disappeard at specific stages	level4
B2Y__5665	biological_process	protein metabolic process	239	0.0121	GO:0019538	B2Y__5665_7	group1: disappeard at specific stages	level4
B2Y__5665	cellular_component	host cell part	1347	0.0682	GO:0033643	B2Y__5665_7	group1: disappeard at specific stages	level4
B2Y__5665	molecular_function	DNA polymerase activity	1699	0.086	GO:0034061	B2Y__5665_7	group1: disappeard at specific stages	level4
B2Y__5665	biological_process	cellular nitrogen compound metabolic process	3572	0.1809	GO:0034641	B2Y__5665_7	group1: disappeard at specific stages	level4
B2Y__5665	molecular_function	identical protein binding	443	0.0224	GO:0042802	B2Y__5665_7	group1: disappeard at specific stages	level4
B2Y__5665	biological_process	macromolecule metabolic process	3322	0.1682	GO:0043170	B2Y__5665_7	group1: disappeard at specific stages	level4
B2Y__5665	cellular_component	host cell	1348	0.0682	GO:0043657	B2Y__5665_7	group1: disappeard at specific stages	level4
B2Y__5665	biological_process	cellular catabolic process	418	0.0211	GO:0044248	B2Y__5665_7	group1: disappeard at specific stages	level4
B2Y__5665	biological_process	cellular biosynthetic process	2795	0.1415	GO:0044249	B2Y__5665_7	group1: disappeard at specific stages	level4
B2Y__5665	biological_process	cellular macromolecule metabolic process	2995	0.1516	GO:0044260	B2Y__5665_7	group1: disappeard at specific stages	level4
B2Y__5665	biological_process	heterocycle metabolic process	3530	0.1787	GO:0046483	B2Y__5665_7	group1: disappeard at specific stages	level4
B2Y__5665	biological_process	regulation of cellular process	768	0.0388	GO:0050794	B2Y__5665_7	group1: disappeard at specific stages	level4
B2Y__5665	biological_process	organic cyclic compound metabolic process	3531	0.1788	GO:1901360	B2Y__5665_7	group1: disappeard at specific stages	level4
B2Y__5665	biological_process	organonitrogen compound metabolic process	671	0.0339	GO:1901564	B2Y__5665_7	group1: disappeard at specific stages	level4
B2Y__5665	biological_process	organic substance catabolic process	495	0.025	GO:1901575	B2Y__5665_7	group1: disappeard at specific stages	level4
B2Y__5665	biological_process	organic substance biosynthetic process	2795	0.1415	GO:1901576	B2Y__5665_7	group1: disappeard at specific stages	level4
B2Y__56831	biological_process	viral process	4311	0.2183	GO:0016032	B2Y__56831_1	group1: disappeard at specific stages	level4
B2Y__57519	biological_process	viral process	4311	0.2183	GO:0016032	B2Y__57519_2	group1: disappeard at specific stages	level4
B2Y__57519	biological_process	interaction with host	589	0.0298	GO:0051701	B2Y__57519_2	group1: disappeard at specific stages	level4
B2Y__653	molecular_function	nucleic acid binding	1291	0.0653	GO:0003676	B2Y__653_4	group1: disappeard at specific stages	level4
B2Y__653	biological_process	nucleobase-containing compound metabolic process	3510	0.1777	GO:0006139	B2Y__653_4	group1: disappeard at specific stages	level4
B2Y__653	biological_process	cellular aromatic compound metabolic process	3530	0.1787	GO:0006725	B2Y__653_4	group1: disappeard at specific stages	level4
B2Y__653	biological_process	cellular component organization	509	0.0257	GO:0016043	B2Y__653_4	group1: disappeard at specific stages	level4
B2Y__653	biological_process	cellular response to stress	530	0.0268	GO:0033554	B2Y__653_4	group1: disappeard at specific stages	level4
B2Y__653	biological_process	cellular nitrogen compound metabolic process	3572	0.1809	GO:0034641	B2Y__653_4	group1: disappeard at specific stages	level4
B2Y__653	biological_process	macromolecule metabolic process	3322	0.1682	GO:0043170	B2Y__653_4	group1: disappeard at specific stages	level4
B2Y__653	biological_process	cellular biosynthetic process	2795	0.1415	GO:0044249	B2Y__653_4	group1: disappeard at specific stages	level4
B2Y__653	biological_process	cellular macromolecule metabolic process	2995	0.1516	GO:0044260	B2Y__653_4	group1: disappeard at specific stages	level4
B2Y__653	biological_process	heterocycle metabolic process	3530	0.1787	GO:0046483	B2Y__653_4	group1: disappeard at specific stages	level4
B2Y__653	biological_process	organic cyclic compound metabolic process	3531	0.1788	GO:1901360	B2Y__653_4	group1: disappeard at specific stages	level4
B2Y__653	biological_process	organic substance biosynthetic process	2795	0.1415	GO:1901576	B2Y__653_4	group1: disappeard at specific stages	level4
B2Y__6962	molecular_function	nucleic acid binding	1291	0.0653	GO:0003676	B2Y__6962_6	group1: disappeard at specific stages	level4
B2Y__6962	biological_process	viral process	4311	0.2183	GO:0016032	B2Y__6962_3	group1: disappeard at specific stages	level4
B2Y__6962	biological_process	viral process	4311	0.2183	GO:0016032	B2Y__6962_5	group1: disappeard at specific stages	level4
B2Y__6962	biological_process	viral process	4311	0.2183	GO:0016032	B2Y__6962_6	group1: disappeard at specific stages	level4
B2Y__6962	molecular_function	hydrolase activity, acting on acid anhydrides	1713	0.0867	GO:0016817	B2Y__6962_6	group1: disappeard at specific stages	level4
B2Y__6962	cellular_component	host cell part	1347	0.0682	GO:0033643	B2Y__6962_3	group1: disappeard at specific stages	level4
B2Y__6962	cellular_component	host cell part	1347	0.0682	GO:0033643	B2Y__6962_4	group1: disappeard at specific stages	level4
B2Y__6962	cellular_component	host cell	1348	0.0682	GO:0043657	B2Y__6962_3	group1: disappeard at specific stages	level4
B2Y__6962	cellular_component	host cell	1348	0.0682	GO:0043657	B2Y__6962_4	group1: disappeard at specific stages	level4
B2Y__6962	biological_process	adhesion of symbiont to host cell	394	0.0199	GO:0044650	B2Y__6962_3	group1: disappeard at specific stages	level4
B2Y__6962	biological_process	interaction with host	589	0.0298	GO:0051701	B2Y__6962_5	group1: disappeard at specific stages	level4
B2Y__8353	cellular_component	host cell part	1347	0.0682	GO:0033643	B2Y__8353_1	group1: disappeard at specific stages	level4
B2Y__8353	cellular_component	host cell	1348	0.0682	GO:0043657	B2Y__8353_1	group1: disappeard at specific stages	level4
B3Y__10079	biological_process	nucleobase-containing compound metabolic process	3510	0.1777	GO:0006139	B3Y__10079_3	group1: disappeard at specific stages	level4
B3Y__10079	biological_process	cellular aromatic compound metabolic process	3530	0.1787	GO:0006725	B3Y__10079_3	group1: disappeard at specific stages	level4
B3Y__10079	molecular_function	transferase activity, transferring phosphorus-containing groups	1843	0.0933	GO:0016772	B3Y__10079_3	group1: disappeard at specific stages	level4
B3Y__10079	molecular_function	hydrolase activity, acting on ester bonds	1071	0.0542	GO:0016788	B3Y__10079_3	group1: disappeard at specific stages	level4
B3Y__10079	molecular_function	DNA polymerase activity	1699	0.086	GO:0034061	B3Y__10079_3	group1: disappeard at specific stages	level4
B3Y__10079	biological_process	cellular nitrogen compound metabolic process	3572	0.1809	GO:0034641	B3Y__10079_3	group1: disappeard at specific stages	level4
B3Y__10079	biological_process	macromolecule metabolic process	3322	0.1682	GO:0043170	B3Y__10079_3	group1: disappeard at specific stages	level4
B3Y__10079	biological_process	cellular biosynthetic process	2795	0.1415	GO:0044249	B3Y__10079_3	group1: disappeard at specific stages	level4
B3Y__10079	biological_process	cellular macromolecule metabolic process	2995	0.1516	GO:0044260	B3Y__10079_3	group1: disappeard at specific stages	level4
B3Y__10079	biological_process	heterocycle metabolic process	3530	0.1787	GO:0046483	B3Y__10079_3	group1: disappeard at specific stages	level4
B3Y__10079	biological_process	organic cyclic compound metabolic process	3531	0.1788	GO:1901360	B3Y__10079_3	group1: disappeard at specific stages	level4
B3Y__10079	biological_process	organic substance biosynthetic process	2795	0.1415	GO:1901576	B3Y__10079_3	group1: disappeard at specific stages	level4
B3Y__13457	biological_process	nucleobase-containing compound metabolic process	3510	0.1777	GO:0006139	B3Y__13457_2	group1: disappeard at specific stages	level4
B3Y__13457	biological_process	cellular aromatic compound metabolic process	3530	0.1787	GO:0006725	B3Y__13457_2	group1: disappeard at specific stages	level4
B3Y__13457	biological_process	viral process	4311	0.2183	GO:0016032	B3Y__13457_2	group1: disappeard at specific stages	level4
B3Y__13457	molecular_function	transferase activity, transferring phosphorus-containing groups	1843	0.0933	GO:0016772	B3Y__13457_2	group1: disappeard at specific stages	level4
B3Y__13457	molecular_function	DNA polymerase activity	1699	0.086	GO:0034061	B3Y__13457_2	group1: disappeard at specific stages	level4
B3Y__13457	biological_process	cellular nitrogen compound metabolic process	3572	0.1809	GO:0034641	B3Y__13457_2	group1: disappeard at specific stages	level4
B3Y__13457	biological_process	macromolecule metabolic process	3322	0.1682	GO:0043170	B3Y__13457_2	group1: disappeard at specific stages	level4
B3Y__13457	biological_process	cellular biosynthetic process	2795	0.1415	GO:0044249	B3Y__13457_2	group1: disappeard at specific stages	level4
B3Y__13457	biological_process	cellular macromolecule metabolic process	2995	0.1516	GO:0044260	B3Y__13457_2	group1: disappeard at specific stages	level4
B3Y__13457	biological_process	heterocycle metabolic process	3530	0.1787	GO:0046483	B3Y__13457_2	group1: disappeard at specific stages	level4
B3Y__13457	biological_process	organic cyclic compound metabolic process	3531	0.1788	GO:1901360	B3Y__13457_2	group1: disappeard at specific stages	level4
B3Y__13457	biological_process	organic substance biosynthetic process	2795	0.1415	GO:1901576	B3Y__13457_2	group1: disappeard at specific stages	level4
B3Y__14305	cellular_component	outer membrane	124	0.0062	GO:0019867	B3Y__14305_4	group1: disappeard at specific stages	level4
B3Y__14305	cellular_component	cell envelope	136	0.0068	GO:0030313	B3Y__14305_4	group1: disappeard at specific stages	level4
B3Y__14305	biological_process	cell-substrate adhesion	78	0.0039	GO:0031589	B3Y__14305_4	group1: disappeard at specific stages	level4
B3Y__14305	biological_process	interaction with host	589	0.0298	GO:0051701	B3Y__14305_4	group1: disappeard at specific stages	level4
B3Y__14305	biological_process	aggregation of unicellular organisms	78	0.0039	GO:0098630	B3Y__14305_4	group1: disappeard at specific stages	level4
B3Y__15337	biological_process	viral process	4311	0.2183	GO:0016032	B3Y__15337_1	group1: disappeard at specific stages	level4
B3Y__16380	biological_process	nucleobase-containing compound metabolic process	3510	0.1777	GO:0006139	B3Y__16380_2	group1: disappeard at specific stages	level4
B3Y__16380	biological_process	cellular aromatic compound metabolic process	3530	0.1787	GO:0006725	B3Y__16380_2	group1: disappeard at specific stages	level4
B3Y__16380	biological_process	viral process	4311	0.2183	GO:0016032	B3Y__16380_2	group1: disappeard at specific stages	level4
B3Y__16380	molecular_function	transferase activity, transferring phosphorus-containing groups	1843	0.0933	GO:0016772	B3Y__16380_2	group1: disappeard at specific stages	level4
B3Y__16380	molecular_function	DNA polymerase activity	1699	0.086	GO:0034061	B3Y__16380_2	group1: disappeard at specific stages	level4
B3Y__16380	biological_process	cellular nitrogen compound metabolic process	3572	0.1809	GO:0034641	B3Y__16380_2	group1: disappeard at specific stages	level4
B3Y__16380	biological_process	macromolecule metabolic process	3322	0.1682	GO:0043170	B3Y__16380_2	group1: disappeard at specific stages	level4
B3Y__16380	biological_process	cellular biosynthetic process	2795	0.1415	GO:0044249	B3Y__16380_2	group1: disappeard at specific stages	level4
B3Y__16380	biological_process	cellular macromolecule metabolic process	2995	0.1516	GO:0044260	B3Y__16380_2	group1: disappeard at specific stages	level4
B3Y__16380	biological_process	heterocycle metabolic process	3530	0.1787	GO:0046483	B3Y__16380_2	group1: disappeard at specific stages	level4
B3Y__16380	biological_process	organic cyclic compound metabolic process	3531	0.1788	GO:1901360	B3Y__16380_2	group1: disappeard at specific stages	level4
B3Y__16380	biological_process	organic substance biosynthetic process	2795	0.1415	GO:1901576	B3Y__16380_2	group1: disappeard at specific stages	level4
B3Y__16619	biological_process	nucleobase-containing compound metabolic process	3510	0.1777	GO:0006139	B3Y__16619_3	group1: disappeard at specific stages	level4
B3Y__16619	biological_process	cellular aromatic compound metabolic process	3530	0.1787	GO:0006725	B3Y__16619_3	group1: disappeard at specific stages	level4
B3Y__16619	biological_process	response to temperature stimulus	140	0.007	GO:0009266	B3Y__16619_3	group1: disappeard at specific stages	level4
B3Y__16619	biological_process	response to heat	99	0.005	GO:0009408	B3Y__16619_3	group1: disappeard at specific stages	level4
B3Y__16619	biological_process	regulation of metabolic process	467	0.0236	GO:0019222	B3Y__16619_3	group1: disappeard at specific stages	level4
B3Y__16619	biological_process	cellular nitrogen compound metabolic process	3572	0.1809	GO:0034641	B3Y__16619_3	group1: disappeard at specific stages	level4
B3Y__16619	biological_process	macromolecule metabolic process	3322	0.1682	GO:0043170	B3Y__16619_3	group1: disappeard at specific stages	level4
B3Y__16619	biological_process	cellular biosynthetic process	2795	0.1415	GO:0044249	B3Y__16619_3	group1: disappeard at specific stages	level4
B3Y__16619	biological_process	cellular macromolecule metabolic process	2995	0.1516	GO:0044260	B3Y__16619_3	group1: disappeard at specific stages	level4
B3Y__16619	biological_process	heterocycle metabolic process	3530	0.1787	GO:0046483	B3Y__16619_3	group1: disappeard at specific stages	level4
B3Y__16619	biological_process	regulation of cellular process	768	0.0388	GO:0050794	B3Y__16619_3	group1: disappeard at specific stages	level4
B3Y__16619	biological_process	organic cyclic compound metabolic process	3531	0.1788	GO:1901360	B3Y__16619_3	group1: disappeard at specific stages	level4
B3Y__16619	biological_process	organic substance biosynthetic process	2795	0.1415	GO:1901576	B3Y__16619_3	group1: disappeard at specific stages	level4
B3Y__16870	biological_process	viral process	4311	0.2183	GO:0016032	B3Y__16870_1	group1: disappeard at specific stages	level4
B3Y__18234	biological_process	viral process	4311	0.2183	GO:0016032	B3Y__18234_1	group1: disappeard at specific stages	level4
B3Y__1844	molecular_function	ribonuclease activity	301	0.0152	GO:0004540	B3Y__1844_5	group1: disappeard at specific stages	level4
B3Y__1844	biological_process	nucleobase-containing compound metabolic process	3510	0.1777	GO:0006139	B3Y__1844_5	group1: disappeard at specific stages	level4
B3Y__1844	biological_process	cellular aromatic compound metabolic process	3530	0.1787	GO:0006725	B3Y__1844_5	group1: disappeard at specific stages	level4
B3Y__1844	biological_process	viral process	4311	0.2183	GO:0016032	B3Y__1844_5	group1: disappeard at specific stages	level4
B3Y__1844	molecular_function	transferase activity, transferring phosphorus-containing groups	1843	0.0933	GO:0016772	B3Y__1844_5	group1: disappeard at specific stages	level4
B3Y__1844	molecular_function	hydrolase activity, acting on ester bonds	1071	0.0542	GO:0016788	B3Y__1844_5	group1: disappeard at specific stages	level4
B3Y__1844	cellular_component	host cell part	1347	0.0682	GO:0033643	B3Y__1844_5	group1: disappeard at specific stages	level4
B3Y__1844	molecular_function	DNA polymerase activity	1699	0.086	GO:0034061	B3Y__1844_5	group1: disappeard at specific stages	level4
B3Y__1844	biological_process	cellular nitrogen compound metabolic process	3572	0.1809	GO:0034641	B3Y__1844_5	group1: disappeard at specific stages	level4
B3Y__1844	biological_process	macromolecule metabolic process	3322	0.1682	GO:0043170	B3Y__1844_5	group1: disappeard at specific stages	level4
B3Y__1844	cellular_component	host cell	1348	0.0682	GO:0043657	B3Y__1844_5	group1: disappeard at specific stages	level4
B3Y__1844	biological_process	cellular biosynthetic process	2795	0.1415	GO:0044249	B3Y__1844_5	group1: disappeard at specific stages	level4
B3Y__1844	biological_process	cellular macromolecule metabolic process	2995	0.1516	GO:0044260	B3Y__1844_5	group1: disappeard at specific stages	level4
B3Y__1844	biological_process	heterocycle metabolic process	3530	0.1787	GO:0046483	B3Y__1844_5	group1: disappeard at specific stages	level4
B3Y__1844	biological_process	organic cyclic compound metabolic process	3531	0.1788	GO:1901360	B3Y__1844_5	group1: disappeard at specific stages	level4
B3Y__1844	biological_process	organic substance biosynthetic process	2795	0.1415	GO:1901576	B3Y__1844_5	group1: disappeard at specific stages	level4
B3Y__1844	biological_process	response to salt	222	0.0112	GO:1902074	B3Y__1844_5	group1: disappeard at specific stages	level4
B3Y__20389	biological_process	cytokinesis	10	0.0005	GO:0000910	B3Y__20389_1	group1: disappeard at specific stages	level4
B3Y__20389	cellular_component	plasma membrane	344	0.0174	GO:0005886	B3Y__20389_1	group1: disappeard at specific stages	level4
B3Y__20389	cellular_component	icosahedral viral capsid	296	0.0149	GO:0019030	B3Y__20389_2	group1: disappeard at specific stages	level4
B3Y__20389	molecular_function	identical protein binding	443	0.0224	GO:0042802	B3Y__20389_1	group1: disappeard at specific stages	level4
B3Y__22126	molecular_function	nucleic acid binding	1291	0.0653	GO:0003676	B3Y__22126_2	group1: disappeard at specific stages	level4
B3Y__22126	biological_process	nucleobase-containing compound metabolic process	3510	0.1777	GO:0006139	B3Y__22126_1	group1: disappeard at specific stages	level4
B3Y__22126	biological_process	cellular aromatic compound metabolic process	3530	0.1787	GO:0006725	B3Y__22126_1	group1: disappeard at specific stages	level4
B3Y__22126	biological_process	viral process	4311	0.2183	GO:0016032	B3Y__22126_1	group1: disappeard at specific stages	level4
B3Y__22126	biological_process	viral process	4311	0.2183	GO:0016032	B3Y__22126_2	group1: disappeard at specific stages	level4
B3Y__22126	molecular_function	transferase activity, transferring phosphorus-containing groups	1843	0.0933	GO:0016772	B3Y__22126_1	group1: disappeard at specific stages	level4
B3Y__22126	molecular_function	hydrolase activity, acting on acid anhydrides	1713	0.0867	GO:0016817	B3Y__22126_2	group1: disappeard at specific stages	level4
B3Y__22126	molecular_function	DNA polymerase activity	1699	0.086	GO:0034061	B3Y__22126_1	group1: disappeard at specific stages	level4
B3Y__22126	biological_process	cellular nitrogen compound metabolic process	3572	0.1809	GO:0034641	B3Y__22126_1	group1: disappeard at specific stages	level4
B3Y__22126	biological_process	macromolecule metabolic process	3322	0.1682	GO:0043170	B3Y__22126_1	group1: disappeard at specific stages	level4
B3Y__22126	biological_process	cellular biosynthetic process	2795	0.1415	GO:0044249	B3Y__22126_1	group1: disappeard at specific stages	level4
B3Y__22126	biological_process	cellular macromolecule metabolic process	2995	0.1516	GO:0044260	B3Y__22126_1	group1: disappeard at specific stages	level4
B3Y__22126	biological_process	heterocycle metabolic process	3530	0.1787	GO:0046483	B3Y__22126_1	group1: disappeard at specific stages	level4
B3Y__22126	biological_process	organic cyclic compound metabolic process	3531	0.1788	GO:1901360	B3Y__22126_1	group1: disappeard at specific stages	level4
B3Y__22126	biological_process	organic substance biosynthetic process	2795	0.1415	GO:1901576	B3Y__22126_1	group1: disappeard at specific stages	level4
B3Y__25200	biological_process	nucleobase-containing compound metabolic process	3510	0.1777	GO:0006139	B3Y__25200_2	group1: disappeard at specific stages	level4
B3Y__25200	biological_process	cellular aromatic compound metabolic process	3530	0.1787	GO:0006725	B3Y__25200_2	group1: disappeard at specific stages	level4
B3Y__25200	biological_process	phosphorus metabolic process	512	0.0259	GO:0006793	B3Y__25200_2	group1: disappeard at specific stages	level4
B3Y__25200	molecular_function	hydrolase activity, acting on acid anhydrides	1713	0.0867	GO:0016817	B3Y__25200_2	group1: disappeard at specific stages	level4
B3Y__25200	biological_process	organophosphate metabolic process	466	0.0236	GO:0019637	B3Y__25200_2	group1: disappeard at specific stages	level4
B3Y__25200	biological_process	cellular nitrogen compound metabolic process	3572	0.1809	GO:0034641	B3Y__25200_2	group1: disappeard at specific stages	level4
B3Y__25200	molecular_function	cation binding	645	0.0326	GO:0043169	B3Y__25200_2	group1: disappeard at specific stages	level4
B3Y__25200	cellular_component	membrane-bounded organelle	254	0.0128	GO:0043227	B3Y__25200_2	group1: disappeard at specific stages	level4
B3Y__25200	cellular_component	intracellular organelle	246	0.0124	GO:0043229	B3Y__25200_2	group1: disappeard at specific stages	level4
B3Y__25200	biological_process	cellular catabolic process	418	0.0211	GO:0044248	B3Y__25200_2	group1: disappeard at specific stages	level4
B3Y__25200	biological_process	cellular biosynthetic process	2795	0.1415	GO:0044249	B3Y__25200_2	group1: disappeard at specific stages	level4
B3Y__25200	biological_process	small molecule biosynthetic process	314	0.0159	GO:0044283	B3Y__25200_2	group1: disappeard at specific stages	level4
B3Y__25200	biological_process	heterocycle metabolic process	3530	0.1787	GO:0046483	B3Y__25200_2	group1: disappeard at specific stages	level4
B3Y__25200	biological_process	nucleobase-containing small molecule metabolic process	469	0.0237	GO:0055086	B3Y__25200_2	group1: disappeard at specific stages	level4
B3Y__25200	biological_process	carbohydrate derivative metabolic process	537	0.0271	GO:1901135	B3Y__25200_2	group1: disappeard at specific stages	level4
B3Y__25200	biological_process	organic cyclic compound metabolic process	3531	0.1788	GO:1901360	B3Y__25200_2	group1: disappeard at specific stages	level4
B3Y__25200	biological_process	organonitrogen compound metabolic process	671	0.0339	GO:1901564	B3Y__25200_2	group1: disappeard at specific stages	level4
B3Y__25200	biological_process	organic substance catabolic process	495	0.025	GO:1901575	B3Y__25200_2	group1: disappeard at specific stages	level4
B3Y__25200	biological_process	organic substance biosynthetic process	2795	0.1415	GO:1901576	B3Y__25200_2	group1: disappeard at specific stages	level4
B3Y__26129	molecular_function	nucleic acid binding	1291	0.0653	GO:0003676	B3Y__26129_2	group1: disappeard at specific stages	level4
B3Y__26129	biological_process	viral process	4311	0.2183	GO:0016032	B3Y__26129_2	group1: disappeard at specific stages	level4
B3Y__26129	molecular_function	hydrolase activity, acting on acid anhydrides	1713	0.0867	GO:0016817	B3Y__26129_2	group1: disappeard at specific stages	level4
B3Y__26957	molecular_function	nucleic acid binding	1291	0.0653	GO:0003676	B3Y__26957_8	group1: disappeard at specific stages	level4
B3Y__26957	biological_process	viral process	4311	0.2183	GO:0016032	B3Y__26957_8	group1: disappeard at specific stages	level4
B3Y__26957	molecular_function	hydrolase activity, acting on acid anhydrides	1713	0.0867	GO:0016817	B3Y__26957_8	group1: disappeard at specific stages	level4
B3Y__3052	molecular_function	RNA helicase activity	24	0.0012	GO:0003724	B3Y__3052_44	group1: disappeard at specific stages	level4
B3Y__3052	biological_process	nucleobase-containing compound metabolic process	3510	0.1777	GO:0006139	B3Y__3052_44	group1: disappeard at specific stages	level4
B3Y__3052	biological_process	cellular aromatic compound metabolic process	3530	0.1787	GO:0006725	B3Y__3052_44	group1: disappeard at specific stages	level4
B3Y__3052	biological_process	response to radiation	108	0.0054	GO:0009314	B3Y__3052_44	group1: disappeard at specific stages	level4
B3Y__3052	molecular_function	hydrolase activity, acting on acid anhydrides	1713	0.0867	GO:0016817	B3Y__3052_44	group1: disappeard at specific stages	level4
B3Y__3052	biological_process	cellular response to stress	530	0.0268	GO:0033554	B3Y__3052_44	group1: disappeard at specific stages	level4
B3Y__3052	biological_process	cellular nitrogen compound metabolic process	3572	0.1809	GO:0034641	B3Y__3052_44	group1: disappeard at specific stages	level4
B3Y__3052	biological_process	response to drug	67	0.0033	GO:0042493	B3Y__3052_44	group1: disappeard at specific stages	level4
B3Y__3052	biological_process	macromolecule metabolic process	3322	0.1682	GO:0043170	B3Y__3052_44	group1: disappeard at specific stages	level4
B3Y__3052	biological_process	cellular macromolecule metabolic process	2995	0.1516	GO:0044260	B3Y__3052_44	group1: disappeard at specific stages	level4
B3Y__3052	biological_process	heterocycle metabolic process	3530	0.1787	GO:0046483	B3Y__3052_44	group1: disappeard at specific stages	level4
B3Y__3052	biological_process	organic cyclic compound metabolic process	3531	0.1788	GO:1901360	B3Y__3052_44	group1: disappeard at specific stages	level4
B3Y__31202	biological_process	nucleobase-containing compound metabolic process	3510	0.1777	GO:0006139	B3Y__31202_1	group1: disappeard at specific stages	level4
B3Y__31202	biological_process	cellular aromatic compound metabolic process	3530	0.1787	GO:0006725	B3Y__31202_1	group1: disappeard at specific stages	level4
B3Y__31202	biological_process	viral process	4311	0.2183	GO:0016032	B3Y__31202_1	group1: disappeard at specific stages	level4
B3Y__31202	molecular_function	transferase activity, transferring phosphorus-containing groups	1843	0.0933	GO:0016772	B3Y__31202_1	group1: disappeard at specific stages	level4
B3Y__31202	molecular_function	DNA polymerase activity	1699	0.086	GO:0034061	B3Y__31202_1	group1: disappeard at specific stages	level4
B3Y__31202	biological_process	cellular nitrogen compound metabolic process	3572	0.1809	GO:0034641	B3Y__31202_1	group1: disappeard at specific stages	level4
B3Y__31202	biological_process	macromolecule metabolic process	3322	0.1682	GO:0043170	B3Y__31202_1	group1: disappeard at specific stages	level4
B3Y__31202	biological_process	cellular biosynthetic process	2795	0.1415	GO:0044249	B3Y__31202_1	group1: disappeard at specific stages	level4
B3Y__31202	biological_process	cellular macromolecule metabolic process	2995	0.1516	GO:0044260	B3Y__31202_1	group1: disappeard at specific stages	level4
B3Y__31202	biological_process	heterocycle metabolic process	3530	0.1787	GO:0046483	B3Y__31202_1	group1: disappeard at specific stages	level4
B3Y__31202	biological_process	organic cyclic compound metabolic process	3531	0.1788	GO:1901360	B3Y__31202_1	group1: disappeard at specific stages	level4
B3Y__31202	biological_process	organic substance biosynthetic process	2795	0.1415	GO:1901576	B3Y__31202_1	group1: disappeard at specific stages	level4
B3Y__31364	biological_process	viral process	4311	0.2183	GO:0016032	B3Y__31364_6	group1: disappeard at specific stages	level4
B3Y__31528	cellular_component	host cell part	1347	0.0682	GO:0033643	B3Y__31528_1	group1: disappeard at specific stages	level4
B3Y__31528	cellular_component	host cell	1348	0.0682	GO:0043657	B3Y__31528_1	group1: disappeard at specific stages	level4
B3Y__33735	biological_process	nucleobase-containing compound metabolic process	3510	0.1777	GO:0006139	B3Y__33735_5	group1: disappeard at specific stages	level4
B3Y__33735	biological_process	cellular aromatic compound metabolic process	3530	0.1787	GO:0006725	B3Y__33735_5	group1: disappeard at specific stages	level4
B3Y__33735	biological_process	viral process	4311	0.2183	GO:0016032	B3Y__33735_5	group1: disappeard at specific stages	level4
B3Y__33735	molecular_function	transferase activity, transferring phosphorus-containing groups	1843	0.0933	GO:0016772	B3Y__33735_5	group1: disappeard at specific stages	level4
B3Y__33735	molecular_function	DNA polymerase activity	1699	0.086	GO:0034061	B3Y__33735_5	group1: disappeard at specific stages	level4
B3Y__33735	biological_process	cellular nitrogen compound metabolic process	3572	0.1809	GO:0034641	B3Y__33735_5	group1: disappeard at specific stages	level4
B3Y__33735	biological_process	macromolecule metabolic process	3322	0.1682	GO:0043170	B3Y__33735_5	group1: disappeard at specific stages	level4
B3Y__33735	biological_process	cellular biosynthetic process	2795	0.1415	GO:0044249	B3Y__33735_5	group1: disappeard at specific stages	level4
B3Y__33735	biological_process	cellular macromolecule metabolic process	2995	0.1516	GO:0044260	B3Y__33735_5	group1: disappeard at specific stages	level4
B3Y__33735	biological_process	heterocycle metabolic process	3530	0.1787	GO:0046483	B3Y__33735_5	group1: disappeard at specific stages	level4
B3Y__33735	biological_process	organic cyclic compound metabolic process	3531	0.1788	GO:1901360	B3Y__33735_5	group1: disappeard at specific stages	level4
B3Y__33735	biological_process	organic substance biosynthetic process	2795	0.1415	GO:1901576	B3Y__33735_5	group1: disappeard at specific stages	level4
B3Y__33837	molecular_function	identical protein binding	443	0.0224	GO:0042802	B3Y__33837_13	group1: disappeard at specific stages	level4
B3Y__33854	biological_process	viral process	4311	0.2183	GO:0016032	B3Y__33854_1	group1: disappeard at specific stages	level4
B3Y__33907	biological_process	nucleobase-containing compound metabolic process	3510	0.1777	GO:0006139	B3Y__33907_3	group1: disappeard at specific stages	level4
B3Y__33907	biological_process	cellular aromatic compound metabolic process	3530	0.1787	GO:0006725	B3Y__33907_3	group1: disappeard at specific stages	level4
B3Y__33907	biological_process	cellular nitrogen compound metabolic process	3572	0.1809	GO:0034641	B3Y__33907_3	group1: disappeard at specific stages	level4
B3Y__33907	biological_process	macromolecule metabolic process	3322	0.1682	GO:0043170	B3Y__33907_3	group1: disappeard at specific stages	level4
B3Y__33907	biological_process	cellular macromolecule metabolic process	2995	0.1516	GO:0044260	B3Y__33907_3	group1: disappeard at specific stages	level4
B3Y__33907	biological_process	heterocycle metabolic process	3530	0.1787	GO:0046483	B3Y__33907_3	group1: disappeard at specific stages	level4
B3Y__33907	biological_process	organic cyclic compound metabolic process	3531	0.1788	GO:1901360	B3Y__33907_3	group1: disappeard at specific stages	level4
B3Y__33928	biological_process	nucleobase-containing compound metabolic process	3510	0.1777	GO:0006139	B3Y__33928_3	group1: disappeard at specific stages	level4
B3Y__33928	biological_process	cellular aromatic compound metabolic process	3530	0.1787	GO:0006725	B3Y__33928_3	group1: disappeard at specific stages	level4
B3Y__33928	biological_process	cellular nitrogen compound metabolic process	3572	0.1809	GO:0034641	B3Y__33928_3	group1: disappeard at specific stages	level4
B3Y__33928	biological_process	macromolecule metabolic process	3322	0.1682	GO:0043170	B3Y__33928_3	group1: disappeard at specific stages	level4
B3Y__33928	biological_process	cellular macromolecule metabolic process	2995	0.1516	GO:0044260	B3Y__33928_3	group1: disappeard at specific stages	level4
B3Y__33928	biological_process	heterocycle metabolic process	3530	0.1787	GO:0046483	B3Y__33928_3	group1: disappeard at specific stages	level4
B3Y__33928	biological_process	organic cyclic compound metabolic process	3531	0.1788	GO:1901360	B3Y__33928_3	group1: disappeard at specific stages	level4
B3Y__3407	biological_process	viral process	4311	0.2183	GO:0016032	B3Y__3407_3	group1: disappeard at specific stages	level4
B3Y__34135	molecular_function	recombinase activity	48	0.0024	GO:0000150	B3Y__34135_3	group1: disappeard at specific stages	level4
B3Y__34135	biological_process	nucleobase-containing compound metabolic process	3510	0.1777	GO:0006139	B3Y__34135_3	group1: disappeard at specific stages	level4
B3Y__34135	biological_process	cellular aromatic compound metabolic process	3530	0.1787	GO:0006725	B3Y__34135_3	group1: disappeard at specific stages	level4
B3Y__34135	molecular_function	integrase activity	69	0.0034	GO:0008907	B3Y__34135_3	group1: disappeard at specific stages	level4
B3Y__34135	biological_process	response to radiation	108	0.0054	GO:0009314	B3Y__34135_3	group1: disappeard at specific stages	level4
B3Y__34135	biological_process	cellular nitrogen compound metabolic process	3572	0.1809	GO:0034641	B3Y__34135_3	group1: disappeard at specific stages	level4
B3Y__34135	biological_process	macromolecule metabolic process	3322	0.1682	GO:0043170	B3Y__34135_3	group1: disappeard at specific stages	level4
B3Y__34135	biological_process	cellular macromolecule metabolic process	2995	0.1516	GO:0044260	B3Y__34135_3	group1: disappeard at specific stages	level4
B3Y__34135	biological_process	heterocycle metabolic process	3530	0.1787	GO:0046483	B3Y__34135_3	group1: disappeard at specific stages	level4
B3Y__34135	biological_process	organic cyclic compound metabolic process	3531	0.1788	GO:1901360	B3Y__34135_3	group1: disappeard at specific stages	level4
B3Y__34135	cellular_component	endonuclease complex	49	0.0024	GO:1905348	B3Y__34135_3	group1: disappeard at specific stages	level4
B3Y__4886	biological_process	viral process	4311	0.2183	GO:0016032	B3Y__4886_1	group1: disappeard at specific stages	level4
B3Y__4886	biological_process	viral process	4311	0.2183	GO:0016032	B3Y__4886_3	group1: disappeard at specific stages	level4
B3Y__4886	cellular_component	host cell part	1347	0.0682	GO:0033643	B3Y__4886_3	group1: disappeard at specific stages	level4
B3Y__4886	cellular_component	host cell	1348	0.0682	GO:0043657	B3Y__4886_3	group1: disappeard at specific stages	level4
B3Y__4886	biological_process	adhesion of symbiont to host cell	394	0.0199	GO:0044650	B3Y__4886_3	group1: disappeard at specific stages	level4
B3Y__5530	biological_process	viral process	4311	0.2183	GO:0016032	B3Y__5530_3	group1: disappeard at specific stages	level4
B3Y__5677	molecular_function	nucleic acid binding	1291	0.0653	GO:0003676	B3Y__5677_5	group1: disappeard at specific stages	level4
B3Y__5677	biological_process	viral process	4311	0.2183	GO:0016032	B3Y__5677_5	group1: disappeard at specific stages	level4
B3Y__5677	molecular_function	hydrolase activity, acting on acid anhydrides	1713	0.0867	GO:0016817	B3Y__5677_5	group1: disappeard at specific stages	level4
B3Y__682	molecular_function	nucleic acid binding	1291	0.0653	GO:0003676	B3Y__682_1	group1: disappeard at specific stages	level4
B3Y__682	biological_process	nucleobase-containing compound metabolic process	3510	0.1777	GO:0006139	B3Y__682_14	group1: disappeard at specific stages	level4
B3Y__682	biological_process	cellular aromatic compound metabolic process	3530	0.1787	GO:0006725	B3Y__682_14	group1: disappeard at specific stages	level4
B3Y__682	biological_process	viral process	4311	0.2183	GO:0016032	B3Y__682_1	group1: disappeard at specific stages	level4
B3Y__682	biological_process	viral process	4311	0.2183	GO:0016032	B3Y__682_14	group1: disappeard at specific stages	level4
B3Y__682	biological_process	viral process	4311	0.2183	GO:0016032	B3Y__682_7	group1: disappeard at specific stages	level4
B3Y__682	molecular_function	transferase activity, transferring phosphorus-containing groups	1843	0.0933	GO:0016772	B3Y__682_14	group1: disappeard at specific stages	level4
B3Y__682	molecular_function	hydrolase activity, acting on acid anhydrides	1713	0.0867	GO:0016817	B3Y__682_1	group1: disappeard at specific stages	level4
B3Y__682	cellular_component	icosahedral viral capsid	296	0.0149	GO:0019030	B3Y__682_9	group1: disappeard at specific stages	level4
B3Y__682	molecular_function	DNA polymerase activity	1699	0.086	GO:0034061	B3Y__682_14	group1: disappeard at specific stages	level4
B3Y__682	biological_process	cellular nitrogen compound metabolic process	3572	0.1809	GO:0034641	B3Y__682_14	group1: disappeard at specific stages	level4
B3Y__682	biological_process	macromolecule metabolic process	3322	0.1682	GO:0043170	B3Y__682_14	group1: disappeard at specific stages	level4
B3Y__682	biological_process	cellular biosynthetic process	2795	0.1415	GO:0044249	B3Y__682_14	group1: disappeard at specific stages	level4
B3Y__682	biological_process	cellular macromolecule metabolic process	2995	0.1516	GO:0044260	B3Y__682_14	group1: disappeard at specific stages	level4
B3Y__682	biological_process	heterocycle metabolic process	3530	0.1787	GO:0046483	B3Y__682_14	group1: disappeard at specific stages	level4
B3Y__682	biological_process	organic cyclic compound metabolic process	3531	0.1788	GO:1901360	B3Y__682_14	group1: disappeard at specific stages	level4
B3Y__682	biological_process	organic substance biosynthetic process	2795	0.1415	GO:1901576	B3Y__682_14	group1: disappeard at specific stages	level4
B3Y__726	molecular_function	nucleic acid binding	1291	0.0653	GO:0003676	B3Y__726_11	group1: disappeard at specific stages	level4
B3Y__726	biological_process	nucleobase-containing compound metabolic process	3510	0.1777	GO:0006139	B3Y__726_10	group1: disappeard at specific stages	level4
B3Y__726	biological_process	cellular aromatic compound metabolic process	3530	0.1787	GO:0006725	B3Y__726_10	group1: disappeard at specific stages	level4
B3Y__726	biological_process	viral process	4311	0.2183	GO:0016032	B3Y__726_10	group1: disappeard at specific stages	level4
B3Y__726	biological_process	viral process	4311	0.2183	GO:0016032	B3Y__726_11	group1: disappeard at specific stages	level4
B3Y__726	molecular_function	transferase activity, transferring phosphorus-containing groups	1843	0.0933	GO:0016772	B3Y__726_10	group1: disappeard at specific stages	level4
B3Y__726	molecular_function	hydrolase activity, acting on acid anhydrides	1713	0.0867	GO:0016817	B3Y__726_11	group1: disappeard at specific stages	level4
B3Y__726	molecular_function	DNA polymerase activity	1699	0.086	GO:0034061	B3Y__726_10	group1: disappeard at specific stages	level4
B3Y__726	biological_process	cellular nitrogen compound metabolic process	3572	0.1809	GO:0034641	B3Y__726_10	group1: disappeard at specific stages	level4
B3Y__726	biological_process	macromolecule metabolic process	3322	0.1682	GO:0043170	B3Y__726_10	group1: disappeard at specific stages	level4
B3Y__726	biological_process	cellular biosynthetic process	2795	0.1415	GO:0044249	B3Y__726_10	group1: disappeard at specific stages	level4
B3Y__726	biological_process	cellular macromolecule metabolic process	2995	0.1516	GO:0044260	B3Y__726_10	group1: disappeard at specific stages	level4
B3Y__726	biological_process	heterocycle metabolic process	3530	0.1787	GO:0046483	B3Y__726_10	group1: disappeard at specific stages	level4
B3Y__726	biological_process	organic cyclic compound metabolic process	3531	0.1788	GO:1901360	B3Y__726_10	group1: disappeard at specific stages	level4
B3Y__726	biological_process	organic substance biosynthetic process	2795	0.1415	GO:1901576	B3Y__726_10	group1: disappeard at specific stages	level4
B3Y__7563	molecular_function	nucleic acid binding	1291	0.0653	GO:0003676	B3Y__7563_7	group1: disappeard at specific stages	level4
B3Y__7563	biological_process	nucleobase-containing compound metabolic process	3510	0.1777	GO:0006139	B3Y__7563_6	group1: disappeard at specific stages	level4
B3Y__7563	biological_process	cellular aromatic compound metabolic process	3530	0.1787	GO:0006725	B3Y__7563_6	group1: disappeard at specific stages	level4
B3Y__7563	biological_process	viral process	4311	0.2183	GO:0016032	B3Y__7563_6	group1: disappeard at specific stages	level4
B3Y__7563	biological_process	viral process	4311	0.2183	GO:0016032	B3Y__7563_7	group1: disappeard at specific stages	level4
B3Y__7563	molecular_function	transferase activity, transferring phosphorus-containing groups	1843	0.0933	GO:0016772	B3Y__7563_6	group1: disappeard at specific stages	level4
B3Y__7563	molecular_function	hydrolase activity, acting on acid anhydrides	1713	0.0867	GO:0016817	B3Y__7563_7	group1: disappeard at specific stages	level4
B3Y__7563	molecular_function	DNA polymerase activity	1699	0.086	GO:0034061	B3Y__7563_6	group1: disappeard at specific stages	level4
B3Y__7563	biological_process	cellular nitrogen compound metabolic process	3572	0.1809	GO:0034641	B3Y__7563_6	group1: disappeard at specific stages	level4
B3Y__7563	biological_process	macromolecule metabolic process	3322	0.1682	GO:0043170	B3Y__7563_6	group1: disappeard at specific stages	level4
B3Y__7563	biological_process	cellular biosynthetic process	2795	0.1415	GO:0044249	B3Y__7563_6	group1: disappeard at specific stages	level4
B3Y__7563	biological_process	cellular macromolecule metabolic process	2995	0.1516	GO:0044260	B3Y__7563_6	group1: disappeard at specific stages	level4
B3Y__7563	biological_process	heterocycle metabolic process	3530	0.1787	GO:0046483	B3Y__7563_6	group1: disappeard at specific stages	level4
B3Y__7563	biological_process	organic cyclic compound metabolic process	3531	0.1788	GO:1901360	B3Y__7563_6	group1: disappeard at specific stages	level4
B3Y__7563	biological_process	organic substance biosynthetic process	2795	0.1415	GO:1901576	B3Y__7563_6	group1: disappeard at specific stages	level4
B4Y__1180	molecular_function	nucleic acid binding	1291	0.0653	GO:0003676	B4Y__1180_4	group1: disappeard at specific stages	level4
B4Y__1180	biological_process	viral process	4311	0.2183	GO:0016032	B4Y__1180_3	group1: disappeard at specific stages	level4
B4Y__1180	biological_process	viral process	4311	0.2183	GO:0016032	B4Y__1180_4	group1: disappeard at specific stages	level4
B4Y__1180	molecular_function	hydrolase activity, acting on acid anhydrides	1713	0.0867	GO:0016817	B4Y__1180_4	group1: disappeard at specific stages	level4
B4Y__12775	cellular_component	host cell part	1347	0.0682	GO:0033643	B4Y__12775_2	group1: disappeard at specific stages	level4
B4Y__12775	cellular_component	host cell	1348	0.0682	GO:0043657	B4Y__12775_2	group1: disappeard at specific stages	level4
B4Y__14915	molecular_function	nucleic acid binding	1291	0.0653	GO:0003676	B4Y__14915_3	group1: disappeard at specific stages	level4
B4Y__14915	biological_process	nucleobase-containing compound metabolic process	3510	0.1777	GO:0006139	B4Y__14915_1	group1: disappeard at specific stages	level4
B4Y__14915	biological_process	cellular aromatic compound metabolic process	3530	0.1787	GO:0006725	B4Y__14915_1	group1: disappeard at specific stages	level4
B4Y__14915	biological_process	viral process	4311	0.2183	GO:0016032	B4Y__14915_1	group1: disappeard at specific stages	level4
B4Y__14915	biological_process	viral process	4311	0.2183	GO:0016032	B4Y__14915_3	group1: disappeard at specific stages	level4
B4Y__14915	biological_process	viral process	4311	0.2183	GO:0016032	B4Y__14915_4	group1: disappeard at specific stages	level4
B4Y__14915	molecular_function	transferase activity, transferring phosphorus-containing groups	1843	0.0933	GO:0016772	B4Y__14915_1	group1: disappeard at specific stages	level4
B4Y__14915	molecular_function	hydrolase activity, acting on acid anhydrides	1713	0.0867	GO:0016817	B4Y__14915_3	group1: disappeard at specific stages	level4
B4Y__14915	molecular_function	DNA polymerase activity	1699	0.086	GO:0034061	B4Y__14915_1	group1: disappeard at specific stages	level4
B4Y__14915	biological_process	cellular nitrogen compound metabolic process	3572	0.1809	GO:0034641	B4Y__14915_1	group1: disappeard at specific stages	level4
B4Y__14915	biological_process	macromolecule metabolic process	3322	0.1682	GO:0043170	B4Y__14915_1	group1: disappeard at specific stages	level4
B4Y__14915	biological_process	cellular biosynthetic process	2795	0.1415	GO:0044249	B4Y__14915_1	group1: disappeard at specific stages	level4
B4Y__14915	biological_process	cellular macromolecule metabolic process	2995	0.1516	GO:0044260	B4Y__14915_1	group1: disappeard at specific stages	level4
B4Y__14915	biological_process	heterocycle metabolic process	3530	0.1787	GO:0046483	B4Y__14915_1	group1: disappeard at specific stages	level4
B4Y__14915	biological_process	organic cyclic compound metabolic process	3531	0.1788	GO:1901360	B4Y__14915_1	group1: disappeard at specific stages	level4
B4Y__14915	biological_process	organic substance biosynthetic process	2795	0.1415	GO:1901576	B4Y__14915_1	group1: disappeard at specific stages	level4
B4Y__15431	biological_process	viral process	4311	0.2183	GO:0016032	B4Y__15431_4	group1: disappeard at specific stages	level4
B4Y__15481	molecular_function	nucleic acid binding	1291	0.0653	GO:0003676	B4Y__15481_1	group1: disappeard at specific stages	level4
B4Y__15481	biological_process	viral process	4311	0.2183	GO:0016032	B4Y__15481_1	group1: disappeard at specific stages	level4
B4Y__15481	molecular_function	hydrolase activity, acting on acid anhydrides	1713	0.0867	GO:0016817	B4Y__15481_1	group1: disappeard at specific stages	level4
B4Y__16468	biological_process	interaction with host	589	0.0298	GO:0051701	B4Y__16468_2	group1: disappeard at specific stages	level4
B4Y__17275	biological_process	nucleobase-containing compound metabolic process	3510	0.1777	GO:0006139	B4Y__17275_3	group1: disappeard at specific stages	level4
B4Y__17275	biological_process	cellular aromatic compound metabolic process	3530	0.1787	GO:0006725	B4Y__17275_3	group1: disappeard at specific stages	level4
B4Y__17275	biological_process	viral process	4311	0.2183	GO:0016032	B4Y__17275_3	group1: disappeard at specific stages	level4
B4Y__17275	molecular_function	transferase activity, transferring phosphorus-containing groups	1843	0.0933	GO:0016772	B4Y__17275_3	group1: disappeard at specific stages	level4
B4Y__17275	molecular_function	DNA polymerase activity	1699	0.086	GO:0034061	B4Y__17275_3	group1: disappeard at specific stages	level4
B4Y__17275	biological_process	cellular nitrogen compound metabolic process	3572	0.1809	GO:0034641	B4Y__17275_3	group1: disappeard at specific stages	level4
B4Y__17275	biological_process	macromolecule metabolic process	3322	0.1682	GO:0043170	B4Y__17275_3	group1: disappeard at specific stages	level4
B4Y__17275	biological_process	cellular biosynthetic process	2795	0.1415	GO:0044249	B4Y__17275_3	group1: disappeard at specific stages	level4
B4Y__17275	biological_process	cellular macromolecule metabolic process	2995	0.1516	GO:0044260	B4Y__17275_3	group1: disappeard at specific stages	level4
B4Y__17275	biological_process	heterocycle metabolic process	3530	0.1787	GO:0046483	B4Y__17275_3	group1: disappeard at specific stages	level4
B4Y__17275	biological_process	organic cyclic compound metabolic process	3531	0.1788	GO:1901360	B4Y__17275_3	group1: disappeard at specific stages	level4
B4Y__17275	biological_process	organic substance biosynthetic process	2795	0.1415	GO:1901576	B4Y__17275_3	group1: disappeard at specific stages	level4
B4Y__24614	molecular_function	lysozyme activity	213	0.0107	GO:0003796	B4Y__24614_3	group1: disappeard at specific stages	level4
B4Y__24614	molecular_function	lytic transglycosylase activity	50	0.0025	GO:0008933	B4Y__24614_3	group1: disappeard at specific stages	level4
B4Y__24614	biological_process	viral process	4311	0.2183	GO:0016032	B4Y__24614_3	group1: disappeard at specific stages	level4
B4Y__24614	molecular_function	transferase activity, transferring glycosyl groups	55	0.0027	GO:0016757	B4Y__24614_3	group1: disappeard at specific stages	level4
B4Y__24614	molecular_function	hydrolase activity, acting on glycosyl bonds	307	0.0155	GO:0016798	B4Y__24614_3	group1: disappeard at specific stages	level4
B4Y__24614	biological_process	disruption of cells of other organism	86	0.0043	GO:0044364	B4Y__24614_3	group1: disappeard at specific stages	level4
B4Y__24614	biological_process	interaction with host	589	0.0298	GO:0051701	B4Y__24614_3	group1: disappeard at specific stages	level4
B4Y__24614	biological_process	modulation of process of other organism involved in symbiotic interaction	168	0.0085	GO:0051817	B4Y__24614_3	group1: disappeard at specific stages	level4
B4Y__24614	biological_process	killing of cells in other organism involved in symbiotic interaction	86	0.0043	GO:0051883	B4Y__24614_3	group1: disappeard at specific stages	level4
B4Y__26248	biological_process	viral process	4311	0.2183	GO:0016032	B4Y__26248_4	group1: disappeard at specific stages	level4
B4Y__26248	cellular_component	host cell part	1347	0.0682	GO:0033643	B4Y__26248_2	group1: disappeard at specific stages	level4
B4Y__26248	cellular_component	host cell part	1347	0.0682	GO:0033643	B4Y__26248_3	group1: disappeard at specific stages	level4
B4Y__26248	cellular_component	host cell part	1347	0.0682	GO:0033643	B4Y__26248_4	group1: disappeard at specific stages	level4
B4Y__26248	cellular_component	host cell	1348	0.0682	GO:0043657	B4Y__26248_2	group1: disappeard at specific stages	level4
B4Y__26248	cellular_component	host cell	1348	0.0682	GO:0043657	B4Y__26248_3	group1: disappeard at specific stages	level4
B4Y__26248	cellular_component	host cell	1348	0.0682	GO:0043657	B4Y__26248_4	group1: disappeard at specific stages	level4
B4Y__26248	biological_process	adhesion of symbiont to host cell	394	0.0199	GO:0044650	B4Y__26248_4	group1: disappeard at specific stages	level4
B4Y__26290	biological_process	viral process	4311	0.2183	GO:0016032	B4Y__26290_1	group1: disappeard at specific stages	level4
B4Y__26290	molecular_function	identical protein binding	443	0.0224	GO:0042802	B4Y__26290_1	group1: disappeard at specific stages	level4
B4Y__26290	biological_process	adhesion of symbiont to host cell	394	0.0199	GO:0044650	B4Y__26290_1	group1: disappeard at specific stages	level4
B4Y__26782	cellular_component	host cell part	1347	0.0682	GO:0033643	B4Y__26782_2	group1: disappeard at specific stages	level4
B4Y__26782	cellular_component	host cell	1348	0.0682	GO:0043657	B4Y__26782_2	group1: disappeard at specific stages	level4
B4Y__27052	biological_process	viral process	4311	0.2183	GO:0016032	B4Y__27052_1	group1: disappeard at specific stages	level4
B4Y__27052	biological_process	interaction with host	589	0.0298	GO:0051701	B4Y__27052_1	group1: disappeard at specific stages	level4
B4Y__27339	cellular_component	host cell part	1347	0.0682	GO:0033643	B4Y__27339_2	group1: disappeard at specific stages	level4
B4Y__27339	cellular_component	host cell	1348	0.0682	GO:0043657	B4Y__27339_2	group1: disappeard at specific stages	level4
B4Y__27554	molecular_function	nucleic acid binding	1291	0.0653	GO:0003676	B4Y__27554_1	group1: disappeard at specific stages	level4
B4Y__27554	biological_process	viral process	4311	0.2183	GO:0016032	B4Y__27554_1	group1: disappeard at specific stages	level4
B4Y__27554	biological_process	viral process	4311	0.2183	GO:0016032	B4Y__27554_3	group1: disappeard at specific stages	level4
B4Y__27554	molecular_function	hydrolase activity, acting on acid anhydrides	1713	0.0867	GO:0016817	B4Y__27554_1	group1: disappeard at specific stages	level4
B4Y__28458	molecular_function	nucleic acid binding	1291	0.0653	GO:0003676	B4Y__28458_3	group1: disappeard at specific stages	level4
B4Y__28458	biological_process	nucleobase-containing compound metabolic process	3510	0.1777	GO:0006139	B4Y__28458_3	group1: disappeard at specific stages	level4
B4Y__28458	biological_process	cellular aromatic compound metabolic process	3530	0.1787	GO:0006725	B4Y__28458_3	group1: disappeard at specific stages	level4
B4Y__28458	molecular_function	enzyme activator activity	31	0.0015	GO:0008047	B4Y__28458_3	group1: disappeard at specific stages	level4
B4Y__28458	biological_process	response to extracellular stimulus	58	0.0029	GO:0009991	B4Y__28458_3	group1: disappeard at specific stages	level4
B4Y__28458	biological_process	cellular response to extracellular stimulus	45	0.0022	GO:0031668	B4Y__28458_3	group1: disappeard at specific stages	level4
B4Y__28458	biological_process	cellular response to stress	530	0.0268	GO:0033554	B4Y__28458_3	group1: disappeard at specific stages	level4
B4Y__28458	biological_process	cellular nitrogen compound metabolic process	3572	0.1809	GO:0034641	B4Y__28458_3	group1: disappeard at specific stages	level4
B4Y__28458	molecular_function	identical protein binding	443	0.0224	GO:0042802	B4Y__28458_3	group1: disappeard at specific stages	level4
B4Y__28458	biological_process	macromolecule metabolic process	3322	0.1682	GO:0043170	B4Y__28458_3	group1: disappeard at specific stages	level4
B4Y__28458	biological_process	positive regulation of molecular function	57	0.0028	GO:0044093	B4Y__28458_3	group1: disappeard at specific stages	level4
B4Y__28458	biological_process	cellular biosynthetic process	2795	0.1415	GO:0044249	B4Y__28458_3	group1: disappeard at specific stages	level4
B4Y__28458	biological_process	cellular macromolecule metabolic process	2995	0.1516	GO:0044260	B4Y__28458_3	group1: disappeard at specific stages	level4
B4Y__28458	biological_process	heterocycle metabolic process	3530	0.1787	GO:0046483	B4Y__28458_3	group1: disappeard at specific stages	level4
B4Y__28458	biological_process	regulation of catalytic activity	64	0.0032	GO:0050790	B4Y__28458_3	group1: disappeard at specific stages	level4
B4Y__28458	biological_process	cellular response to external stimulus	46	0.0023	GO:0071496	B4Y__28458_3	group1: disappeard at specific stages	level4
B4Y__28458	biological_process	organic cyclic compound metabolic process	3531	0.1788	GO:1901360	B4Y__28458_3	group1: disappeard at specific stages	level4
B4Y__28458	biological_process	organic substance biosynthetic process	2795	0.1415	GO:1901576	B4Y__28458_3	group1: disappeard at specific stages	level4
B4Y__28927	molecular_function	lysozyme activity	213	0.0107	GO:0003796	B4Y__28927_1	group1: disappeard at specific stages	level4
B4Y__28927	molecular_function	hydrolase activity, acting on glycosyl bonds	307	0.0155	GO:0016798	B4Y__28927_1	group1: disappeard at specific stages	level4
B4Y__2990	molecular_function	ribonuclease activity	301	0.0152	GO:0004540	B4Y__2990_1	group1: disappeard at specific stages	level4
B4Y__2990	biological_process	nucleobase-containing compound metabolic process	3510	0.1777	GO:0006139	B4Y__2990_1	group1: disappeard at specific stages	level4
B4Y__2990	biological_process	cellular aromatic compound metabolic process	3530	0.1787	GO:0006725	B4Y__2990_1	group1: disappeard at specific stages	level4
B4Y__2990	biological_process	viral process	4311	0.2183	GO:0016032	B4Y__2990_1	group1: disappeard at specific stages	level4
B4Y__2990	molecular_function	transferase activity, transferring phosphorus-containing groups	1843	0.0933	GO:0016772	B4Y__2990_1	group1: disappeard at specific stages	level4
B4Y__2990	molecular_function	hydrolase activity, acting on ester bonds	1071	0.0542	GO:0016788	B4Y__2990_1	group1: disappeard at specific stages	level4
B4Y__2990	cellular_component	host cell part	1347	0.0682	GO:0033643	B4Y__2990_1	group1: disappeard at specific stages	level4
B4Y__2990	molecular_function	DNA polymerase activity	1699	0.086	GO:0034061	B4Y__2990_1	group1: disappeard at specific stages	level4
B4Y__2990	biological_process	cellular nitrogen compound metabolic process	3572	0.1809	GO:0034641	B4Y__2990_1	group1: disappeard at specific stages	level4
B4Y__2990	biological_process	macromolecule metabolic process	3322	0.1682	GO:0043170	B4Y__2990_1	group1: disappeard at specific stages	level4
B4Y__2990	cellular_component	host cell	1348	0.0682	GO:0043657	B4Y__2990_1	group1: disappeard at specific stages	level4
B4Y__2990	biological_process	cellular biosynthetic process	2795	0.1415	GO:0044249	B4Y__2990_1	group1: disappeard at specific stages	level4
B4Y__2990	biological_process	cellular macromolecule metabolic process	2995	0.1516	GO:0044260	B4Y__2990_1	group1: disappeard at specific stages	level4
B4Y__2990	biological_process	heterocycle metabolic process	3530	0.1787	GO:0046483	B4Y__2990_1	group1: disappeard at specific stages	level4
B4Y__2990	biological_process	organic cyclic compound metabolic process	3531	0.1788	GO:1901360	B4Y__2990_1	group1: disappeard at specific stages	level4
B4Y__2990	biological_process	organic substance biosynthetic process	2795	0.1415	GO:1901576	B4Y__2990_1	group1: disappeard at specific stages	level4
B4Y__2990	biological_process	response to salt	222	0.0112	GO:1902074	B4Y__2990_1	group1: disappeard at specific stages	level4
B4Y__30180	biological_process	nucleobase-containing compound metabolic process	3510	0.1777	GO:0006139	B4Y__30180_1	group1: disappeard at specific stages	level4
B4Y__30180	biological_process	cellular aromatic compound metabolic process	3530	0.1787	GO:0006725	B4Y__30180_1	group1: disappeard at specific stages	level4
B4Y__30180	biological_process	viral process	4311	0.2183	GO:0016032	B4Y__30180_1	group1: disappeard at specific stages	level4
B4Y__30180	molecular_function	transferase activity, transferring phosphorus-containing groups	1843	0.0933	GO:0016772	B4Y__30180_1	group1: disappeard at specific stages	level4
B4Y__30180	molecular_function	DNA polymerase activity	1699	0.086	GO:0034061	B4Y__30180_1	group1: disappeard at specific stages	level4
B4Y__30180	biological_process	cellular nitrogen compound metabolic process	3572	0.1809	GO:0034641	B4Y__30180_1	group1: disappeard at specific stages	level4
B4Y__30180	biological_process	macromolecule metabolic process	3322	0.1682	GO:0043170	B4Y__30180_1	group1: disappeard at specific stages	level4
B4Y__30180	biological_process	cellular biosynthetic process	2795	0.1415	GO:0044249	B4Y__30180_1	group1: disappeard at specific stages	level4
B4Y__30180	biological_process	cellular macromolecule metabolic process	2995	0.1516	GO:0044260	B4Y__30180_1	group1: disappeard at specific stages	level4
B4Y__30180	biological_process	heterocycle metabolic process	3530	0.1787	GO:0046483	B4Y__30180_1	group1: disappeard at specific stages	level4
B4Y__30180	biological_process	organic cyclic compound metabolic process	3531	0.1788	GO:1901360	B4Y__30180_1	group1: disappeard at specific stages	level4
B4Y__30180	biological_process	organic substance biosynthetic process	2795	0.1415	GO:1901576	B4Y__30180_1	group1: disappeard at specific stages	level4
B4Y__315	biological_process	viral process	4311	0.2183	GO:0016032	B4Y__315_1	group1: disappeard at specific stages	level4
B4Y__315	biological_process	interaction with host	589	0.0298	GO:0051701	B4Y__315_1	group1: disappeard at specific stages	level4
B4Y__31781	biological_process	viral process	4311	0.2183	GO:0016032	B4Y__31781_2	group1: disappeard at specific stages	level4
B4Y__31781	molecular_function	hydrolase activity, acting on glycosyl bonds	307	0.0155	GO:0016798	B4Y__31781_2	group1: disappeard at specific stages	level4
B4Y__31781	biological_process	response to external biotic stimulus	186	0.0094	GO:0043207	B4Y__31781_2	group1: disappeard at specific stages	level4
B4Y__31781	biological_process	adhesion of symbiont to host cell	394	0.0199	GO:0044650	B4Y__31781_2	group1: disappeard at specific stages	level4
B4Y__31781	biological_process	interaction with host	589	0.0298	GO:0051701	B4Y__31781_2	group1: disappeard at specific stages	level4
B4Y__31781	biological_process	modulation of process of other organism involved in symbiotic interaction	168	0.0085	GO:0051817	B4Y__31781_2	group1: disappeard at specific stages	level4
B4Y__31781	biological_process	response to defenses of other organism	62	0.0031	GO:0052173	B4Y__31781_2	group1: disappeard at specific stages	level4
B4Y__31781	biological_process	response to host	62	0.0031	GO:0075136	B4Y__31781_2	group1: disappeard at specific stages	level4
B4Y__31937	biological_process	viral process	4311	0.2183	GO:0016032	B4Y__31937_3	group1: disappeard at specific stages	level4
B4Y__34447	molecular_function	ribonuclease activity	301	0.0152	GO:0004540	B4Y__34447_3	group1: disappeard at specific stages	level4
B4Y__34447	biological_process	nucleobase-containing compound metabolic process	3510	0.1777	GO:0006139	B4Y__34447_3	group1: disappeard at specific stages	level4
B4Y__34447	biological_process	cellular aromatic compound metabolic process	3530	0.1787	GO:0006725	B4Y__34447_3	group1: disappeard at specific stages	level4
B4Y__34447	biological_process	viral process	4311	0.2183	GO:0016032	B4Y__34447_3	group1: disappeard at specific stages	level4
B4Y__34447	molecular_function	transferase activity, transferring phosphorus-containing groups	1843	0.0933	GO:0016772	B4Y__34447_3	group1: disappeard at specific stages	level4
B4Y__34447	molecular_function	hydrolase activity, acting on ester bonds	1071	0.0542	GO:0016788	B4Y__34447_3	group1: disappeard at specific stages	level4
B4Y__34447	cellular_component	host cell part	1347	0.0682	GO:0033643	B4Y__34447_3	group1: disappeard at specific stages	level4
B4Y__34447	molecular_function	DNA polymerase activity	1699	0.086	GO:0034061	B4Y__34447_3	group1: disappeard at specific stages	level4
B4Y__34447	biological_process	cellular nitrogen compound metabolic process	3572	0.1809	GO:0034641	B4Y__34447_3	group1: disappeard at specific stages	level4
B4Y__34447	biological_process	macromolecule metabolic process	3322	0.1682	GO:0043170	B4Y__34447_3	group1: disappeard at specific stages	level4
B4Y__34447	cellular_component	host cell	1348	0.0682	GO:0043657	B4Y__34447_3	group1: disappeard at specific stages	level4
B4Y__34447	biological_process	cellular biosynthetic process	2795	0.1415	GO:0044249	B4Y__34447_3	group1: disappeard at specific stages	level4
B4Y__34447	biological_process	cellular macromolecule metabolic process	2995	0.1516	GO:0044260	B4Y__34447_3	group1: disappeard at specific stages	level4
B4Y__34447	biological_process	heterocycle metabolic process	3530	0.1787	GO:0046483	B4Y__34447_3	group1: disappeard at specific stages	level4
B4Y__34447	biological_process	organic cyclic compound metabolic process	3531	0.1788	GO:1901360	B4Y__34447_3	group1: disappeard at specific stages	level4
B4Y__34447	biological_process	organic substance biosynthetic process	2795	0.1415	GO:1901576	B4Y__34447_3	group1: disappeard at specific stages	level4
B4Y__34447	biological_process	response to salt	222	0.0112	GO:1902074	B4Y__34447_3	group1: disappeard at specific stages	level4
B4Y__34487	biological_process	viral process	4311	0.2183	GO:0016032	B4Y__34487_1	group1: disappeard at specific stages	level4
B4Y__34487	biological_process	viral process	4311	0.2183	GO:0016032	B4Y__34487_3	group1: disappeard at specific stages	level4
B4Y__35962	biological_process	nucleobase-containing compound metabolic process	3510	0.1777	GO:0006139	B4Y__35962_1	group1: disappeard at specific stages	level4
B4Y__35962	biological_process	cellular aromatic compound metabolic process	3530	0.1787	GO:0006725	B4Y__35962_1	group1: disappeard at specific stages	level4
B4Y__35962	biological_process	viral process	4311	0.2183	GO:0016032	B4Y__35962_1	group1: disappeard at specific stages	level4
B4Y__35962	molecular_function	transferase activity, transferring phosphorus-containing groups	1843	0.0933	GO:0016772	B4Y__35962_1	group1: disappeard at specific stages	level4
B4Y__35962	molecular_function	DNA polymerase activity	1699	0.086	GO:0034061	B4Y__35962_1	group1: disappeard at specific stages	level4
B4Y__35962	biological_process	cellular nitrogen compound metabolic process	3572	0.1809	GO:0034641	B4Y__35962_1	group1: disappeard at specific stages	level4
B4Y__35962	biological_process	macromolecule metabolic process	3322	0.1682	GO:0043170	B4Y__35962_1	group1: disappeard at specific stages	level4
B4Y__35962	biological_process	cellular biosynthetic process	2795	0.1415	GO:0044249	B4Y__35962_1	group1: disappeard at specific stages	level4
B4Y__35962	biological_process	cellular macromolecule metabolic process	2995	0.1516	GO:0044260	B4Y__35962_1	group1: disappeard at specific stages	level4
B4Y__35962	biological_process	heterocycle metabolic process	3530	0.1787	GO:0046483	B4Y__35962_1	group1: disappeard at specific stages	level4
B4Y__35962	biological_process	organic cyclic compound metabolic process	3531	0.1788	GO:1901360	B4Y__35962_1	group1: disappeard at specific stages	level4
B4Y__35962	biological_process	organic substance biosynthetic process	2795	0.1415	GO:1901576	B4Y__35962_1	group1: disappeard at specific stages	level4
B4Y__39672	biological_process	viral process	4311	0.2183	GO:0016032	B4Y__39672_3	group1: disappeard at specific stages	level4
B4Y__39672	biological_process	interaction with host	589	0.0298	GO:0051701	B4Y__39672_3	group1: disappeard at specific stages	level4
B4Y__39761	molecular_function	nucleic acid binding	1291	0.0653	GO:0003676	B4Y__39761_1	group1: disappeard at specific stages	level4
B4Y__39761	molecular_function	nucleic acid binding	1291	0.0653	GO:0003676	B4Y__39761_3	group1: disappeard at specific stages	level4
B4Y__39761	biological_process	viral process	4311	0.2183	GO:0016032	B4Y__39761_2	group1: disappeard at specific stages	level4
B4Y__39761	cellular_component	icosahedral viral capsid	296	0.0149	GO:0019030	B4Y__39761_1	group1: disappeard at specific stages	level4
B4Y__39761	cellular_component	icosahedral viral capsid	296	0.0149	GO:0019030	B4Y__39761_3	group1: disappeard at specific stages	level4
B4Y__39761	molecular_function	cation binding	645	0.0326	GO:0043169	B4Y__39761_1	group1: disappeard at specific stages	level4
B4Y__39761	molecular_function	cation binding	645	0.0326	GO:0043169	B4Y__39761_3	group1: disappeard at specific stages	level4
B4Y__39826	biological_process	viral process	4311	0.2183	GO:0016032	B4Y__39826_2	group1: disappeard at specific stages	level4
B4Y__39848	biological_process	viral process	4311	0.2183	GO:0016032	B4Y__39848_2	group1: disappeard at specific stages	level4
B4Y__39879	biological_process	viral process	4311	0.2183	GO:0016032	B4Y__39879_3	group1: disappeard at specific stages	level4
B4Y__39898	biological_process	viral process	4311	0.2183	GO:0016032	B4Y__39898_1	group1: disappeard at specific stages	level4
B4Y__39898	biological_process	viral process	4311	0.2183	GO:0016032	B4Y__39898_3	group1: disappeard at specific stages	level4
B4Y__6040	molecular_function	deoxyribonuclease activity	145	0.0073	GO:0004536	B4Y__6040_12	group1: disappeard at specific stages	level4
B4Y__6040	molecular_function	ribonuclease activity	301	0.0152	GO:0004540	B4Y__6040_12	group1: disappeard at specific stages	level4
B4Y__6040	biological_process	nucleobase-containing compound metabolic process	3510	0.1777	GO:0006139	B4Y__6040_12	group1: disappeard at specific stages	level4
B4Y__6040	biological_process	cellular aromatic compound metabolic process	3530	0.1787	GO:0006725	B4Y__6040_12	group1: disappeard at specific stages	level4
B4Y__6040	molecular_function	hydrolase activity, acting on ester bonds	1071	0.0542	GO:0016788	B4Y__6040_12	group1: disappeard at specific stages	level4
B4Y__6040	biological_process	cellular nitrogen compound metabolic process	3572	0.1809	GO:0034641	B4Y__6040_12	group1: disappeard at specific stages	level4
B4Y__6040	biological_process	macromolecule metabolic process	3322	0.1682	GO:0043170	B4Y__6040_12	group1: disappeard at specific stages	level4
B4Y__6040	biological_process	cellular macromolecule metabolic process	2995	0.1516	GO:0044260	B4Y__6040_12	group1: disappeard at specific stages	level4
B4Y__6040	biological_process	heterocycle metabolic process	3530	0.1787	GO:0046483	B4Y__6040_12	group1: disappeard at specific stages	level4
B4Y__6040	biological_process	organic cyclic compound metabolic process	3531	0.1788	GO:1901360	B4Y__6040_12	group1: disappeard at specific stages	level4
B4Y__8596	biological_process	viral process	4311	0.2183	GO:0016032	B4Y__8596_5	group1: disappeard at specific stages	level4
B4Y__8596	biological_process	interaction with host	589	0.0298	GO:0051701	B4Y__8596_5	group1: disappeard at specific stages	level4
B5Y__10036	cellular_component	outer membrane	124	0.0062	GO:0019867	B5Y__10036_3	group1: disappeard at specific stages	level4
B5Y__10036	cellular_component	cell envelope	136	0.0068	GO:0030313	B5Y__10036_3	group1: disappeard at specific stages	level4
B5Y__10036	biological_process	cell-substrate adhesion	78	0.0039	GO:0031589	B5Y__10036_3	group1: disappeard at specific stages	level4
B5Y__10036	biological_process	interaction with host	589	0.0298	GO:0051701	B5Y__10036_3	group1: disappeard at specific stages	level4
B5Y__10036	biological_process	aggregation of unicellular organisms	78	0.0039	GO:0098630	B5Y__10036_3	group1: disappeard at specific stages	level4
B5Y__11563	biological_process	nucleobase-containing compound metabolic process	3510	0.1777	GO:0006139	B5Y__11563_5	group1: disappeard at specific stages	level4
B5Y__11563	biological_process	cellular aromatic compound metabolic process	3530	0.1787	GO:0006725	B5Y__11563_5	group1: disappeard at specific stages	level4
B5Y__11563	molecular_function	transferase activity, transferring phosphorus-containing groups	1843	0.0933	GO:0016772	B5Y__11563_5	group1: disappeard at specific stages	level4
B5Y__11563	molecular_function	hydrolase activity, acting on ester bonds	1071	0.0542	GO:0016788	B5Y__11563_5	group1: disappeard at specific stages	level4
B5Y__11563	biological_process	cellular response to stress	530	0.0268	GO:0033554	B5Y__11563_5	group1: disappeard at specific stages	level4
B5Y__11563	molecular_function	DNA polymerase activity	1699	0.086	GO:0034061	B5Y__11563_5	group1: disappeard at specific stages	level4
B5Y__11563	biological_process	cellular nitrogen compound metabolic process	3572	0.1809	GO:0034641	B5Y__11563_5	group1: disappeard at specific stages	level4
B5Y__11563	biological_process	macromolecule metabolic process	3322	0.1682	GO:0043170	B5Y__11563_5	group1: disappeard at specific stages	level4
B5Y__11563	biological_process	cellular biosynthetic process	2795	0.1415	GO:0044249	B5Y__11563_5	group1: disappeard at specific stages	level4
B5Y__11563	biological_process	cellular macromolecule metabolic process	2995	0.1516	GO:0044260	B5Y__11563_5	group1: disappeard at specific stages	level4
B5Y__11563	biological_process	heterocycle metabolic process	3530	0.1787	GO:0046483	B5Y__11563_5	group1: disappeard at specific stages	level4
B5Y__11563	biological_process	organic cyclic compound metabolic process	3531	0.1788	GO:1901360	B5Y__11563_5	group1: disappeard at specific stages	level4
B5Y__11563	biological_process	organic substance biosynthetic process	2795	0.1415	GO:1901576	B5Y__11563_5	group1: disappeard at specific stages	level4
B5Y__11613	molecular_function	nucleic acid binding	1291	0.0653	GO:0003676	B5Y__11613_4	group1: disappeard at specific stages	level4
B5Y__11613	biological_process	viral process	4311	0.2183	GO:0016032	B5Y__11613_4	group1: disappeard at specific stages	level4
B5Y__11613	molecular_function	hydrolase activity, acting on acid anhydrides	1713	0.0867	GO:0016817	B5Y__11613_4	group1: disappeard at specific stages	level4
B5Y__14338	biological_process	viral process	4311	0.2183	GO:0016032	B5Y__14338_1	group1: disappeard at specific stages	level4
B5Y__14338	biological_process	interaction with host	589	0.0298	GO:0051701	B5Y__14338_1	group1: disappeard at specific stages	level4
B5Y__15000	biological_process	nucleobase-containing compound metabolic process	3510	0.1777	GO:0006139	B5Y__15000_7	group1: disappeard at specific stages	level4
B5Y__15000	biological_process	cellular aromatic compound metabolic process	3530	0.1787	GO:0006725	B5Y__15000_7	group1: disappeard at specific stages	level4
B5Y__15000	biological_process	response to temperature stimulus	140	0.007	GO:0009266	B5Y__15000_7	group1: disappeard at specific stages	level4
B5Y__15000	biological_process	response to heat	99	0.005	GO:0009408	B5Y__15000_7	group1: disappeard at specific stages	level4
B5Y__15000	molecular_function	hydrolase activity, acting on acid anhydrides	1713	0.0867	GO:0016817	B5Y__15000_5	group1: disappeard at specific stages	level4
B5Y__15000	biological_process	regulation of metabolic process	467	0.0236	GO:0019222	B5Y__15000_7	group1: disappeard at specific stages	level4
B5Y__15000	biological_process	cellular nitrogen compound metabolic process	3572	0.1809	GO:0034641	B5Y__15000_7	group1: disappeard at specific stages	level4
B5Y__15000	biological_process	macromolecule metabolic process	3322	0.1682	GO:0043170	B5Y__15000_7	group1: disappeard at specific stages	level4
B5Y__15000	biological_process	cellular biosynthetic process	2795	0.1415	GO:0044249	B5Y__15000_7	group1: disappeard at specific stages	level4
B5Y__15000	biological_process	cellular macromolecule metabolic process	2995	0.1516	GO:0044260	B5Y__15000_7	group1: disappeard at specific stages	level4
B5Y__15000	biological_process	heterocycle metabolic process	3530	0.1787	GO:0046483	B5Y__15000_7	group1: disappeard at specific stages	level4
B5Y__15000	biological_process	regulation of cellular process	768	0.0388	GO:0050794	B5Y__15000_7	group1: disappeard at specific stages	level4
B5Y__15000	biological_process	organic cyclic compound metabolic process	3531	0.1788	GO:1901360	B5Y__15000_7	group1: disappeard at specific stages	level4
B5Y__15000	biological_process	organic substance biosynthetic process	2795	0.1415	GO:1901576	B5Y__15000_7	group1: disappeard at specific stages	level4
B5Y__15424	molecular_function	DNA helicase activity	130	0.0065	GO:0003678	B5Y__15424_3	group1: disappeard at specific stages	level4
B5Y__15424	biological_process	nucleobase-containing compound metabolic process	3510	0.1777	GO:0006139	B5Y__15424_3	group1: disappeard at specific stages	level4
B5Y__15424	biological_process	cellular aromatic compound metabolic process	3530	0.1787	GO:0006725	B5Y__15424_3	group1: disappeard at specific stages	level4
B5Y__15424	biological_process	cellular component organization	509	0.0257	GO:0016043	B5Y__15424_3	group1: disappeard at specific stages	level4
B5Y__15424	molecular_function	hydrolase activity, acting on acid anhydrides	1713	0.0867	GO:0016817	B5Y__15424_3	group1: disappeard at specific stages	level4
B5Y__15424	biological_process	cellular nitrogen compound metabolic process	3572	0.1809	GO:0034641	B5Y__15424_3	group1: disappeard at specific stages	level4
B5Y__15424	biological_process	macromolecule metabolic process	3322	0.1682	GO:0043170	B5Y__15424_3	group1: disappeard at specific stages	level4
B5Y__15424	biological_process	cellular biosynthetic process	2795	0.1415	GO:0044249	B5Y__15424_3	group1: disappeard at specific stages	level4
B5Y__15424	biological_process	cellular macromolecule metabolic process	2995	0.1516	GO:0044260	B5Y__15424_3	group1: disappeard at specific stages	level4
B5Y__15424	biological_process	heterocycle metabolic process	3530	0.1787	GO:0046483	B5Y__15424_3	group1: disappeard at specific stages	level4
B5Y__15424	biological_process	organic cyclic compound metabolic process	3531	0.1788	GO:1901360	B5Y__15424_3	group1: disappeard at specific stages	level4
B5Y__15424	biological_process	organic substance biosynthetic process	2795	0.1415	GO:1901576	B5Y__15424_3	group1: disappeard at specific stages	level4
B5Y__22196	molecular_function	nucleic acid binding	1291	0.0653	GO:0003676	B5Y__22196_1	group1: disappeard at specific stages	level4
B5Y__22196	biological_process	nucleobase-containing compound metabolic process	3510	0.1777	GO:0006139	B5Y__22196_3	group1: disappeard at specific stages	level4
B5Y__22196	biological_process	cellular aromatic compound metabolic process	3530	0.1787	GO:0006725	B5Y__22196_3	group1: disappeard at specific stages	level4
B5Y__22196	biological_process	viral process	4311	0.2183	GO:0016032	B5Y__22196_1	group1: disappeard at specific stages	level4
B5Y__22196	biological_process	viral process	4311	0.2183	GO:0016032	B5Y__22196_3	group1: disappeard at specific stages	level4
B5Y__22196	molecular_function	transferase activity, transferring phosphorus-containing groups	1843	0.0933	GO:0016772	B5Y__22196_3	group1: disappeard at specific stages	level4
B5Y__22196	molecular_function	hydrolase activity, acting on acid anhydrides	1713	0.0867	GO:0016817	B5Y__22196_1	group1: disappeard at specific stages	level4
B5Y__22196	molecular_function	DNA polymerase activity	1699	0.086	GO:0034061	B5Y__22196_3	group1: disappeard at specific stages	level4
B5Y__22196	biological_process	cellular nitrogen compound metabolic process	3572	0.1809	GO:0034641	B5Y__22196_3	group1: disappeard at specific stages	level4
B5Y__22196	biological_process	macromolecule metabolic process	3322	0.1682	GO:0043170	B5Y__22196_3	group1: disappeard at specific stages	level4
B5Y__22196	biological_process	cellular biosynthetic process	2795	0.1415	GO:0044249	B5Y__22196_3	group1: disappeard at specific stages	level4
B5Y__22196	biological_process	cellular macromolecule metabolic process	2995	0.1516	GO:0044260	B5Y__22196_3	group1: disappeard at specific stages	level4
B5Y__22196	biological_process	heterocycle metabolic process	3530	0.1787	GO:0046483	B5Y__22196_3	group1: disappeard at specific stages	level4
B5Y__22196	biological_process	organic cyclic compound metabolic process	3531	0.1788	GO:1901360	B5Y__22196_3	group1: disappeard at specific stages	level4
B5Y__22196	biological_process	organic substance biosynthetic process	2795	0.1415	GO:1901576	B5Y__22196_3	group1: disappeard at specific stages	level4
B5Y__24046	biological_process	nucleobase-containing compound metabolic process	3510	0.1777	GO:0006139	B5Y__24046_5	group1: disappeard at specific stages	level4
B5Y__24046	biological_process	cellular aromatic compound metabolic process	3530	0.1787	GO:0006725	B5Y__24046_5	group1: disappeard at specific stages	level4
B5Y__24046	biological_process	viral process	4311	0.2183	GO:0016032	B5Y__24046_5	group1: disappeard at specific stages	level4
B5Y__24046	molecular_function	transferase activity, transferring phosphorus-containing groups	1843	0.0933	GO:0016772	B5Y__24046_5	group1: disappeard at specific stages	level4
B5Y__24046	molecular_function	DNA polymerase activity	1699	0.086	GO:0034061	B5Y__24046_5	group1: disappeard at specific stages	level4
B5Y__24046	biological_process	cellular nitrogen compound metabolic process	3572	0.1809	GO:0034641	B5Y__24046_5	group1: disappeard at specific stages	level4
B5Y__24046	biological_process	macromolecule metabolic process	3322	0.1682	GO:0043170	B5Y__24046_5	group1: disappeard at specific stages	level4
B5Y__24046	biological_process	cellular biosynthetic process	2795	0.1415	GO:0044249	B5Y__24046_5	group1: disappeard at specific stages	level4
B5Y__24046	biological_process	cellular macromolecule metabolic process	2995	0.1516	GO:0044260	B5Y__24046_5	group1: disappeard at specific stages	level4
B5Y__24046	biological_process	heterocycle metabolic process	3530	0.1787	GO:0046483	B5Y__24046_5	group1: disappeard at specific stages	level4
B5Y__24046	biological_process	organic cyclic compound metabolic process	3531	0.1788	GO:1901360	B5Y__24046_5	group1: disappeard at specific stages	level4
B5Y__24046	biological_process	organic substance biosynthetic process	2795	0.1415	GO:1901576	B5Y__24046_5	group1: disappeard at specific stages	level4
B5Y__24345	cellular_component	icosahedral viral capsid	296	0.0149	GO:0019030	B5Y__24345_6	group1: disappeard at specific stages	level4
B5Y__28695	biological_process	viral process	4311	0.2183	GO:0016032	B5Y__28695_2	group1: disappeard at specific stages	level4
B5Y__29059	molecular_function	nucleic acid binding	1291	0.0653	GO:0003676	B5Y__29059_29	group1: disappeard at specific stages	level4
B5Y__29059	biological_process	nucleobase-containing compound metabolic process	3510	0.1777	GO:0006139	B5Y__29059_29	group1: disappeard at specific stages	level4
B5Y__29059	biological_process	cellular aromatic compound metabolic process	3530	0.1787	GO:0006725	B5Y__29059_29	group1: disappeard at specific stages	level4
B5Y__29059	molecular_function	enzyme activator activity	31	0.0015	GO:0008047	B5Y__29059_29	group1: disappeard at specific stages	level4
B5Y__29059	biological_process	response to extracellular stimulus	58	0.0029	GO:0009991	B5Y__29059_29	group1: disappeard at specific stages	level4
B5Y__29059	biological_process	cellular response to extracellular stimulus	45	0.0022	GO:0031668	B5Y__29059_29	group1: disappeard at specific stages	level4
B5Y__29059	biological_process	cellular response to stress	530	0.0268	GO:0033554	B5Y__29059_29	group1: disappeard at specific stages	level4
B5Y__29059	biological_process	cellular nitrogen compound metabolic process	3572	0.1809	GO:0034641	B5Y__29059_29	group1: disappeard at specific stages	level4
B5Y__29059	molecular_function	identical protein binding	443	0.0224	GO:0042802	B5Y__29059_29	group1: disappeard at specific stages	level4
B5Y__29059	biological_process	macromolecule metabolic process	3322	0.1682	GO:0043170	B5Y__29059_29	group1: disappeard at specific stages	level4
B5Y__29059	biological_process	positive regulation of molecular function	57	0.0028	GO:0044093	B5Y__29059_29	group1: disappeard at specific stages	level4
B5Y__29059	biological_process	cellular biosynthetic process	2795	0.1415	GO:0044249	B5Y__29059_29	group1: disappeard at specific stages	level4
B5Y__29059	biological_process	cellular macromolecule metabolic process	2995	0.1516	GO:0044260	B5Y__29059_29	group1: disappeard at specific stages	level4
B5Y__29059	biological_process	heterocycle metabolic process	3530	0.1787	GO:0046483	B5Y__29059_29	group1: disappeard at specific stages	level4
B5Y__29059	biological_process	regulation of catalytic activity	64	0.0032	GO:0050790	B5Y__29059_29	group1: disappeard at specific stages	level4
B5Y__29059	biological_process	cellular response to external stimulus	46	0.0023	GO:0071496	B5Y__29059_29	group1: disappeard at specific stages	level4
B5Y__29059	biological_process	organic cyclic compound metabolic process	3531	0.1788	GO:1901360	B5Y__29059_29	group1: disappeard at specific stages	level4
B5Y__29059	biological_process	organic substance biosynthetic process	2795	0.1415	GO:1901576	B5Y__29059_29	group1: disappeard at specific stages	level4
B5Y__29275	cellular_component	host cell part	1347	0.0682	GO:0033643	B5Y__29275_5	group1: disappeard at specific stages	level4
B5Y__29275	cellular_component	host cell	1348	0.0682	GO:0043657	B5Y__29275_5	group1: disappeard at specific stages	level4
B5Y__31784	cellular_component	host cell part	1347	0.0682	GO:0033643	B5Y__31784_1	group1: disappeard at specific stages	level4
B5Y__31784	cellular_component	host cell	1348	0.0682	GO:0043657	B5Y__31784_1	group1: disappeard at specific stages	level4
B5Y__4837	biological_process	nucleobase-containing compound metabolic process	3510	0.1777	GO:0006139	B5Y__4837_3	group1: disappeard at specific stages	level4
B5Y__4837	biological_process	cellular aromatic compound metabolic process	3530	0.1787	GO:0006725	B5Y__4837_3	group1: disappeard at specific stages	level4
B5Y__4837	biological_process	phosphorus metabolic process	512	0.0259	GO:0006793	B5Y__4837_3	group1: disappeard at specific stages	level4
B5Y__4837	molecular_function	hydrolase activity, acting on acid anhydrides	1713	0.0867	GO:0016817	B5Y__4837_3	group1: disappeard at specific stages	level4
B5Y__4837	biological_process	organophosphate metabolic process	466	0.0236	GO:0019637	B5Y__4837_3	group1: disappeard at specific stages	level4
B5Y__4837	biological_process	cellular nitrogen compound metabolic process	3572	0.1809	GO:0034641	B5Y__4837_3	group1: disappeard at specific stages	level4
B5Y__4837	molecular_function	cation binding	645	0.0326	GO:0043169	B5Y__4837_3	group1: disappeard at specific stages	level4
B5Y__4837	biological_process	cellular catabolic process	418	0.0211	GO:0044248	B5Y__4837_3	group1: disappeard at specific stages	level4
B5Y__4837	biological_process	cellular biosynthetic process	2795	0.1415	GO:0044249	B5Y__4837_3	group1: disappeard at specific stages	level4
B5Y__4837	biological_process	small molecule biosynthetic process	314	0.0159	GO:0044283	B5Y__4837_3	group1: disappeard at specific stages	level4
B5Y__4837	biological_process	heterocycle metabolic process	3530	0.1787	GO:0046483	B5Y__4837_3	group1: disappeard at specific stages	level4
B5Y__4837	biological_process	nucleobase-containing small molecule metabolic process	469	0.0237	GO:0055086	B5Y__4837_3	group1: disappeard at specific stages	level4
B5Y__4837	biological_process	carbohydrate derivative metabolic process	537	0.0271	GO:1901135	B5Y__4837_3	group1: disappeard at specific stages	level4
B5Y__4837	biological_process	organic cyclic compound metabolic process	3531	0.1788	GO:1901360	B5Y__4837_3	group1: disappeard at specific stages	level4
B5Y__4837	biological_process	organonitrogen compound metabolic process	671	0.0339	GO:1901564	B5Y__4837_3	group1: disappeard at specific stages	level4
B5Y__4837	biological_process	organic substance catabolic process	495	0.025	GO:1901575	B5Y__4837_3	group1: disappeard at specific stages	level4
B5Y__4837	biological_process	organic substance biosynthetic process	2795	0.1415	GO:1901576	B5Y__4837_3	group1: disappeard at specific stages	level4
B5Y__7337	biological_process	nucleobase-containing compound metabolic process	3510	0.1777	GO:0006139	B5Y__7337_1	group1: disappeard at specific stages	level4
B5Y__7337	biological_process	cellular aromatic compound metabolic process	3530	0.1787	GO:0006725	B5Y__7337_1	group1: disappeard at specific stages	level4
B5Y__7337	biological_process	viral process	4311	0.2183	GO:0016032	B5Y__7337_1	group1: disappeard at specific stages	level4
B5Y__7337	molecular_function	transferase activity, transferring phosphorus-containing groups	1843	0.0933	GO:0016772	B5Y__7337_1	group1: disappeard at specific stages	level4
B5Y__7337	molecular_function	DNA polymerase activity	1699	0.086	GO:0034061	B5Y__7337_1	group1: disappeard at specific stages	level4
B5Y__7337	biological_process	cellular nitrogen compound metabolic process	3572	0.1809	GO:0034641	B5Y__7337_1	group1: disappeard at specific stages	level4
B5Y__7337	biological_process	macromolecule metabolic process	3322	0.1682	GO:0043170	B5Y__7337_1	group1: disappeard at specific stages	level4
B5Y__7337	biological_process	cellular biosynthetic process	2795	0.1415	GO:0044249	B5Y__7337_1	group1: disappeard at specific stages	level4
B5Y__7337	biological_process	cellular macromolecule metabolic process	2995	0.1516	GO:0044260	B5Y__7337_1	group1: disappeard at specific stages	level4
B5Y__7337	biological_process	heterocycle metabolic process	3530	0.1787	GO:0046483	B5Y__7337_1	group1: disappeard at specific stages	level4
B5Y__7337	biological_process	organic cyclic compound metabolic process	3531	0.1788	GO:1901360	B5Y__7337_1	group1: disappeard at specific stages	level4
B5Y__7337	biological_process	organic substance biosynthetic process	2795	0.1415	GO:1901576	B5Y__7337_1	group1: disappeard at specific stages	level4
B5Y__8900	biological_process	nucleobase-containing compound metabolic process	3510	0.1777	GO:0006139	B5Y__8900_4	group1: disappeard at specific stages	level4
B5Y__8900	biological_process	cellular aromatic compound metabolic process	3530	0.1787	GO:0006725	B5Y__8900_4	group1: disappeard at specific stages	level4
B5Y__8900	biological_process	response to temperature stimulus	140	0.007	GO:0009266	B5Y__8900_4	group1: disappeard at specific stages	level4
B5Y__8900	biological_process	response to heat	99	0.005	GO:0009408	B5Y__8900_4	group1: disappeard at specific stages	level4
B5Y__8900	biological_process	regulation of metabolic process	467	0.0236	GO:0019222	B5Y__8900_4	group1: disappeard at specific stages	level4
B5Y__8900	biological_process	cellular nitrogen compound metabolic process	3572	0.1809	GO:0034641	B5Y__8900_4	group1: disappeard at specific stages	level4
B5Y__8900	biological_process	macromolecule metabolic process	3322	0.1682	GO:0043170	B5Y__8900_4	group1: disappeard at specific stages	level4
B5Y__8900	biological_process	cellular biosynthetic process	2795	0.1415	GO:0044249	B5Y__8900_4	group1: disappeard at specific stages	level4
B5Y__8900	biological_process	cellular macromolecule metabolic process	2995	0.1516	GO:0044260	B5Y__8900_4	group1: disappeard at specific stages	level4
B5Y__8900	biological_process	heterocycle metabolic process	3530	0.1787	GO:0046483	B5Y__8900_4	group1: disappeard at specific stages	level4
B5Y__8900	biological_process	regulation of cellular process	768	0.0388	GO:0050794	B5Y__8900_4	group1: disappeard at specific stages	level4
B5Y__8900	biological_process	organic cyclic compound metabolic process	3531	0.1788	GO:1901360	B5Y__8900_4	group1: disappeard at specific stages	level4
B5Y__8900	biological_process	organic substance biosynthetic process	2795	0.1415	GO:1901576	B5Y__8900_4	group1: disappeard at specific stages	level4
Y1Y__10006	biological_process	nucleobase-containing compound metabolic process	3510	0.1777	GO:0006139	Y1Y__10006_4	group1: disappeard at specific stages	level4
Y1Y__10006	biological_process	cellular aromatic compound metabolic process	3530	0.1787	GO:0006725	Y1Y__10006_4	group1: disappeard at specific stages	level4
Y1Y__10006	biological_process	viral process	4311	0.2183	GO:0016032	Y1Y__10006_4	group1: disappeard at specific stages	level4
Y1Y__10006	molecular_function	transferase activity, transferring phosphorus-containing groups	1843	0.0933	GO:0016772	Y1Y__10006_4	group1: disappeard at specific stages	level4
Y1Y__10006	molecular_function	DNA polymerase activity	1699	0.086	GO:0034061	Y1Y__10006_4	group1: disappeard at specific stages	level4
Y1Y__10006	biological_process	cellular nitrogen compound metabolic process	3572	0.1809	GO:0034641	Y1Y__10006_4	group1: disappeard at specific stages	level4
Y1Y__10006	biological_process	macromolecule metabolic process	3322	0.1682	GO:0043170	Y1Y__10006_4	group1: disappeard at specific stages	level4
Y1Y__10006	biological_process	cellular biosynthetic process	2795	0.1415	GO:0044249	Y1Y__10006_4	group1: disappeard at specific stages	level4
Y1Y__10006	biological_process	cellular macromolecule metabolic process	2995	0.1516	GO:0044260	Y1Y__10006_4	group1: disappeard at specific stages	level4
Y1Y__10006	biological_process	heterocycle metabolic process	3530	0.1787	GO:0046483	Y1Y__10006_4	group1: disappeard at specific stages	level4
Y1Y__10006	biological_process	organic cyclic compound metabolic process	3531	0.1788	GO:1901360	Y1Y__10006_4	group1: disappeard at specific stages	level4
Y1Y__10006	biological_process	organic substance biosynthetic process	2795	0.1415	GO:1901576	Y1Y__10006_4	group1: disappeard at specific stages	level4
Y1Y__10374	biological_process	viral process	4311	0.2183	GO:0016032	Y1Y__10374_2	group1: disappeard at specific stages	level4
Y1Y__10450	biological_process	viral process	4311	0.2183	GO:0016032	Y1Y__10450_1	group1: disappeard at specific stages	level4
Y1Y__12730	biological_process	nucleobase-containing compound metabolic process	3510	0.1777	GO:0006139	Y1Y__12730_3	group1: disappeard at specific stages	level4
Y1Y__12730	biological_process	cellular aromatic compound metabolic process	3530	0.1787	GO:0006725	Y1Y__12730_3	group1: disappeard at specific stages	level4
Y1Y__12730	biological_process	phosphorus metabolic process	512	0.0259	GO:0006793	Y1Y__12730_3	group1: disappeard at specific stages	level4
Y1Y__12730	molecular_function	transferase activity, transferring phosphorus-containing groups	1843	0.0933	GO:0016772	Y1Y__12730_3	group1: disappeard at specific stages	level4
Y1Y__12730	biological_process	organophosphate metabolic process	466	0.0236	GO:0019637	Y1Y__12730_3	group1: disappeard at specific stages	level4
Y1Y__12730	biological_process	cellular nitrogen compound metabolic process	3572	0.1809	GO:0034641	Y1Y__12730_3	group1: disappeard at specific stages	level4
Y1Y__12730	biological_process	cellular biosynthetic process	2795	0.1415	GO:0044249	Y1Y__12730_3	group1: disappeard at specific stages	level4
Y1Y__12730	biological_process	heterocycle metabolic process	3530	0.1787	GO:0046483	Y1Y__12730_3	group1: disappeard at specific stages	level4
Y1Y__12730	biological_process	nucleobase-containing small molecule metabolic process	469	0.0237	GO:0055086	Y1Y__12730_3	group1: disappeard at specific stages	level4
Y1Y__12730	biological_process	carbohydrate derivative metabolic process	537	0.0271	GO:1901135	Y1Y__12730_3	group1: disappeard at specific stages	level4
Y1Y__12730	biological_process	organic cyclic compound metabolic process	3531	0.1788	GO:1901360	Y1Y__12730_3	group1: disappeard at specific stages	level4
Y1Y__12730	biological_process	organonitrogen compound metabolic process	671	0.0339	GO:1901564	Y1Y__12730_3	group1: disappeard at specific stages	level4
Y1Y__12730	biological_process	organic substance biosynthetic process	2795	0.1415	GO:1901576	Y1Y__12730_3	group1: disappeard at specific stages	level4
Y1Y__13069	molecular_function	ribonuclease activity	301	0.0152	GO:0004540	Y1Y__13069_1	group1: disappeard at specific stages	level4
Y1Y__13069	biological_process	nucleobase-containing compound metabolic process	3510	0.1777	GO:0006139	Y1Y__13069_1	group1: disappeard at specific stages	level4
Y1Y__13069	biological_process	cellular aromatic compound metabolic process	3530	0.1787	GO:0006725	Y1Y__13069_1	group1: disappeard at specific stages	level4
Y1Y__13069	biological_process	viral process	4311	0.2183	GO:0016032	Y1Y__13069_1	group1: disappeard at specific stages	level4
Y1Y__13069	molecular_function	transferase activity, transferring phosphorus-containing groups	1843	0.0933	GO:0016772	Y1Y__13069_1	group1: disappeard at specific stages	level4
Y1Y__13069	molecular_function	hydrolase activity, acting on ester bonds	1071	0.0542	GO:0016788	Y1Y__13069_1	group1: disappeard at specific stages	level4
Y1Y__13069	cellular_component	host cell part	1347	0.0682	GO:0033643	Y1Y__13069_1	group1: disappeard at specific stages	level4
Y1Y__13069	molecular_function	DNA polymerase activity	1699	0.086	GO:0034061	Y1Y__13069_1	group1: disappeard at specific stages	level4
Y1Y__13069	biological_process	cellular nitrogen compound metabolic process	3572	0.1809	GO:0034641	Y1Y__13069_1	group1: disappeard at specific stages	level4
Y1Y__13069	biological_process	macromolecule metabolic process	3322	0.1682	GO:0043170	Y1Y__13069_1	group1: disappeard at specific stages	level4
Y1Y__13069	cellular_component	host cell	1348	0.0682	GO:0043657	Y1Y__13069_1	group1: disappeard at specific stages	level4
Y1Y__13069	biological_process	cellular biosynthetic process	2795	0.1415	GO:0044249	Y1Y__13069_1	group1: disappeard at specific stages	level4
Y1Y__13069	biological_process	cellular macromolecule metabolic process	2995	0.1516	GO:0044260	Y1Y__13069_1	group1: disappeard at specific stages	level4
Y1Y__13069	biological_process	heterocycle metabolic process	3530	0.1787	GO:0046483	Y1Y__13069_1	group1: disappeard at specific stages	level4
Y1Y__13069	biological_process	organic cyclic compound metabolic process	3531	0.1788	GO:1901360	Y1Y__13069_1	group1: disappeard at specific stages	level4
Y1Y__13069	biological_process	organic substance biosynthetic process	2795	0.1415	GO:1901576	Y1Y__13069_1	group1: disappeard at specific stages	level4
Y1Y__13069	biological_process	response to salt	222	0.0112	GO:1902074	Y1Y__13069_1	group1: disappeard at specific stages	level4
Y1Y__13580	cellular_component	outer membrane	124	0.0062	GO:0019867	Y1Y__13580_1	group1: disappeard at specific stages	level4
Y1Y__13580	cellular_component	cell envelope	136	0.0068	GO:0030313	Y1Y__13580_1	group1: disappeard at specific stages	level4
Y1Y__13580	biological_process	cell-substrate adhesion	78	0.0039	GO:0031589	Y1Y__13580_1	group1: disappeard at specific stages	level4
Y1Y__13580	biological_process	interaction with host	589	0.0298	GO:0051701	Y1Y__13580_1	group1: disappeard at specific stages	level4
Y1Y__13580	biological_process	aggregation of unicellular organisms	78	0.0039	GO:0098630	Y1Y__13580_1	group1: disappeard at specific stages	level4
Y1Y__14518	molecular_function	nucleic acid binding	1291	0.0653	GO:0003676	Y1Y__14518_1	group1: disappeard at specific stages	level4
Y1Y__14518	biological_process	viral process	4311	0.2183	GO:0016032	Y1Y__14518_1	group1: disappeard at specific stages	level4
Y1Y__14518	molecular_function	hydrolase activity, acting on acid anhydrides	1713	0.0867	GO:0016817	Y1Y__14518_1	group1: disappeard at specific stages	level4
Y1Y__14677	biological_process	nucleobase-containing compound metabolic process	3510	0.1777	GO:0006139	Y1Y__14677_1	group1: disappeard at specific stages	level4
Y1Y__14677	biological_process	cellular aromatic compound metabolic process	3530	0.1787	GO:0006725	Y1Y__14677_1	group1: disappeard at specific stages	level4
Y1Y__14677	biological_process	phosphorus metabolic process	512	0.0259	GO:0006793	Y1Y__14677_1	group1: disappeard at specific stages	level4
Y1Y__14677	biological_process	cellular component organization	509	0.0257	GO:0016043	Y1Y__14677_1	group1: disappeard at specific stages	level4
Y1Y__14677	molecular_function	hydrolase activity, acting on acid anhydrides	1713	0.0867	GO:0016817	Y1Y__14677_1	group1: disappeard at specific stages	level4
Y1Y__14677	biological_process	organophosphate metabolic process	466	0.0236	GO:0019637	Y1Y__14677_1	group1: disappeard at specific stages	level4
Y1Y__14677	biological_process	cellular nitrogen compound metabolic process	3572	0.1809	GO:0034641	Y1Y__14677_1	group1: disappeard at specific stages	level4
Y1Y__14677	molecular_function	cation binding	645	0.0326	GO:0043169	Y1Y__14677_1	group1: disappeard at specific stages	level4
Y1Y__14677	biological_process	cellular component biogenesis	182	0.0092	GO:0044085	Y1Y__14677_1	group1: disappeard at specific stages	level4
Y1Y__14677	biological_process	cellular catabolic process	418	0.0211	GO:0044248	Y1Y__14677_1	group1: disappeard at specific stages	level4
Y1Y__14677	biological_process	cellular biosynthetic process	2795	0.1415	GO:0044249	Y1Y__14677_1	group1: disappeard at specific stages	level4
Y1Y__14677	biological_process	small molecule biosynthetic process	314	0.0159	GO:0044283	Y1Y__14677_1	group1: disappeard at specific stages	level4
Y1Y__14677	biological_process	heterocycle metabolic process	3530	0.1787	GO:0046483	Y1Y__14677_1	group1: disappeard at specific stages	level4
Y1Y__14677	biological_process	nucleobase-containing small molecule metabolic process	469	0.0237	GO:0055086	Y1Y__14677_1	group1: disappeard at specific stages	level4
Y1Y__14677	biological_process	carbohydrate derivative metabolic process	537	0.0271	GO:1901135	Y1Y__14677_1	group1: disappeard at specific stages	level4
Y1Y__14677	biological_process	organic cyclic compound metabolic process	3531	0.1788	GO:1901360	Y1Y__14677_1	group1: disappeard at specific stages	level4
Y1Y__14677	biological_process	organonitrogen compound metabolic process	671	0.0339	GO:1901564	Y1Y__14677_1	group1: disappeard at specific stages	level4
Y1Y__14677	biological_process	organic substance catabolic process	495	0.025	GO:1901575	Y1Y__14677_1	group1: disappeard at specific stages	level4
Y1Y__14677	biological_process	organic substance biosynthetic process	2795	0.1415	GO:1901576	Y1Y__14677_1	group1: disappeard at specific stages	level4
Y1Y__1589	biological_process	nucleobase-containing compound metabolic process	3510	0.1777	GO:0006139	Y1Y__1589_2	group1: disappeard at specific stages	level4
Y1Y__1589	biological_process	cellular aromatic compound metabolic process	3530	0.1787	GO:0006725	Y1Y__1589_2	group1: disappeard at specific stages	level4
Y1Y__1589	biological_process	viral process	4311	0.2183	GO:0016032	Y1Y__1589_2	group1: disappeard at specific stages	level4
Y1Y__1589	molecular_function	transferase activity, transferring phosphorus-containing groups	1843	0.0933	GO:0016772	Y1Y__1589_2	group1: disappeard at specific stages	level4
Y1Y__1589	molecular_function	DNA polymerase activity	1699	0.086	GO:0034061	Y1Y__1589_2	group1: disappeard at specific stages	level4
Y1Y__1589	biological_process	cellular nitrogen compound metabolic process	3572	0.1809	GO:0034641	Y1Y__1589_2	group1: disappeard at specific stages	level4
Y1Y__1589	biological_process	macromolecule metabolic process	3322	0.1682	GO:0043170	Y1Y__1589_2	group1: disappeard at specific stages	level4
Y1Y__1589	biological_process	cellular biosynthetic process	2795	0.1415	GO:0044249	Y1Y__1589_2	group1: disappeard at specific stages	level4
Y1Y__1589	biological_process	cellular macromolecule metabolic process	2995	0.1516	GO:0044260	Y1Y__1589_2	group1: disappeard at specific stages	level4
Y1Y__1589	biological_process	heterocycle metabolic process	3530	0.1787	GO:0046483	Y1Y__1589_2	group1: disappeard at specific stages	level4
Y1Y__1589	biological_process	organic cyclic compound metabolic process	3531	0.1788	GO:1901360	Y1Y__1589_2	group1: disappeard at specific stages	level4
Y1Y__1589	biological_process	organic substance biosynthetic process	2795	0.1415	GO:1901576	Y1Y__1589_2	group1: disappeard at specific stages	level4
Y1Y__16046	molecular_function	RNA helicase activity	24	0.0012	GO:0003724	Y1Y__16046_1	group1: disappeard at specific stages	level4
Y1Y__16046	biological_process	nucleobase-containing compound metabolic process	3510	0.1777	GO:0006139	Y1Y__16046_1	group1: disappeard at specific stages	level4
Y1Y__16046	biological_process	cellular aromatic compound metabolic process	3530	0.1787	GO:0006725	Y1Y__16046_1	group1: disappeard at specific stages	level4
Y1Y__16046	biological_process	response to radiation	108	0.0054	GO:0009314	Y1Y__16046_1	group1: disappeard at specific stages	level4
Y1Y__16046	molecular_function	hydrolase activity, acting on acid anhydrides	1713	0.0867	GO:0016817	Y1Y__16046_1	group1: disappeard at specific stages	level4
Y1Y__16046	biological_process	cellular response to stress	530	0.0268	GO:0033554	Y1Y__16046_1	group1: disappeard at specific stages	level4
Y1Y__16046	biological_process	cellular nitrogen compound metabolic process	3572	0.1809	GO:0034641	Y1Y__16046_1	group1: disappeard at specific stages	level4
Y1Y__16046	biological_process	response to drug	67	0.0033	GO:0042493	Y1Y__16046_1	group1: disappeard at specific stages	level4
Y1Y__16046	biological_process	macromolecule metabolic process	3322	0.1682	GO:0043170	Y1Y__16046_1	group1: disappeard at specific stages	level4
Y1Y__16046	biological_process	cellular macromolecule metabolic process	2995	0.1516	GO:0044260	Y1Y__16046_1	group1: disappeard at specific stages	level4
Y1Y__16046	biological_process	heterocycle metabolic process	3530	0.1787	GO:0046483	Y1Y__16046_1	group1: disappeard at specific stages	level4
Y1Y__16046	biological_process	organic cyclic compound metabolic process	3531	0.1788	GO:1901360	Y1Y__16046_1	group1: disappeard at specific stages	level4
Y1Y__17482	molecular_function	nucleic acid binding	1291	0.0653	GO:0003676	Y1Y__17482_5	group1: disappeard at specific stages	level4
Y1Y__17482	biological_process	nucleobase-containing compound metabolic process	3510	0.1777	GO:0006139	Y1Y__17482_3	group1: disappeard at specific stages	level4
Y1Y__17482	biological_process	cellular aromatic compound metabolic process	3530	0.1787	GO:0006725	Y1Y__17482_3	group1: disappeard at specific stages	level4
Y1Y__17482	biological_process	viral process	4311	0.2183	GO:0016032	Y1Y__17482_3	group1: disappeard at specific stages	level4
Y1Y__17482	biological_process	viral process	4311	0.2183	GO:0016032	Y1Y__17482_5	group1: disappeard at specific stages	level4
Y1Y__17482	molecular_function	transferase activity, transferring phosphorus-containing groups	1843	0.0933	GO:0016772	Y1Y__17482_3	group1: disappeard at specific stages	level4
Y1Y__17482	molecular_function	hydrolase activity, acting on acid anhydrides	1713	0.0867	GO:0016817	Y1Y__17482_5	group1: disappeard at specific stages	level4
Y1Y__17482	molecular_function	DNA polymerase activity	1699	0.086	GO:0034061	Y1Y__17482_3	group1: disappeard at specific stages	level4
Y1Y__17482	biological_process	cellular nitrogen compound metabolic process	3572	0.1809	GO:0034641	Y1Y__17482_3	group1: disappeard at specific stages	level4
Y1Y__17482	biological_process	macromolecule metabolic process	3322	0.1682	GO:0043170	Y1Y__17482_3	group1: disappeard at specific stages	level4
Y1Y__17482	biological_process	cellular biosynthetic process	2795	0.1415	GO:0044249	Y1Y__17482_3	group1: disappeard at specific stages	level4
Y1Y__17482	biological_process	cellular macromolecule metabolic process	2995	0.1516	GO:0044260	Y1Y__17482_3	group1: disappeard at specific stages	level4
Y1Y__17482	biological_process	heterocycle metabolic process	3530	0.1787	GO:0046483	Y1Y__17482_3	group1: disappeard at specific stages	level4
Y1Y__17482	biological_process	organic cyclic compound metabolic process	3531	0.1788	GO:1901360	Y1Y__17482_3	group1: disappeard at specific stages	level4
Y1Y__17482	biological_process	organic substance biosynthetic process	2795	0.1415	GO:1901576	Y1Y__17482_3	group1: disappeard at specific stages	level4
Y1Y__18204	cellular_component	host cell part	1347	0.0682	GO:0033643	Y1Y__18204_2	group1: disappeard at specific stages	level4
Y1Y__18204	cellular_component	host cell	1348	0.0682	GO:0043657	Y1Y__18204_2	group1: disappeard at specific stages	level4
Y1Y__18258	biological_process	viral process	4311	0.2183	GO:0016032	Y1Y__18258_1	group1: disappeard at specific stages	level4
Y1Y__1853	cellular_component	host cell part	1347	0.0682	GO:0033643	Y1Y__1853_4	group1: disappeard at specific stages	level4
Y1Y__1853	cellular_component	host cell	1348	0.0682	GO:0043657	Y1Y__1853_4	group1: disappeard at specific stages	level4
Y1Y__18882	biological_process	nucleobase-containing compound metabolic process	3510	0.1777	GO:0006139	Y1Y__18882_4	group1: disappeard at specific stages	level4
Y1Y__18882	biological_process	cellular aromatic compound metabolic process	3530	0.1787	GO:0006725	Y1Y__18882_4	group1: disappeard at specific stages	level4
Y1Y__18882	biological_process	phosphorus metabolic process	512	0.0259	GO:0006793	Y1Y__18882_4	group1: disappeard at specific stages	level4
Y1Y__18882	molecular_function	hydrolase activity, acting on acid anhydrides	1713	0.0867	GO:0016817	Y1Y__18882_4	group1: disappeard at specific stages	level4
Y1Y__18882	biological_process	organophosphate metabolic process	466	0.0236	GO:0019637	Y1Y__18882_4	group1: disappeard at specific stages	level4
Y1Y__18882	biological_process	cellular nitrogen compound metabolic process	3572	0.1809	GO:0034641	Y1Y__18882_4	group1: disappeard at specific stages	level4
Y1Y__18882	molecular_function	cation binding	645	0.0326	GO:0043169	Y1Y__18882_4	group1: disappeard at specific stages	level4
Y1Y__18882	biological_process	cellular catabolic process	418	0.0211	GO:0044248	Y1Y__18882_4	group1: disappeard at specific stages	level4
Y1Y__18882	biological_process	cellular biosynthetic process	2795	0.1415	GO:0044249	Y1Y__18882_4	group1: disappeard at specific stages	level4
Y1Y__18882	biological_process	small molecule biosynthetic process	314	0.0159	GO:0044283	Y1Y__18882_4	group1: disappeard at specific stages	level4
Y1Y__18882	biological_process	heterocycle metabolic process	3530	0.1787	GO:0046483	Y1Y__18882_4	group1: disappeard at specific stages	level4
Y1Y__18882	biological_process	nucleobase-containing small molecule metabolic process	469	0.0237	GO:0055086	Y1Y__18882_4	group1: disappeard at specific stages	level4
Y1Y__18882	biological_process	carbohydrate derivative metabolic process	537	0.0271	GO:1901135	Y1Y__18882_4	group1: disappeard at specific stages	level4
Y1Y__18882	biological_process	organic cyclic compound metabolic process	3531	0.1788	GO:1901360	Y1Y__18882_4	group1: disappeard at specific stages	level4
Y1Y__18882	biological_process	organonitrogen compound metabolic process	671	0.0339	GO:1901564	Y1Y__18882_4	group1: disappeard at specific stages	level4
Y1Y__18882	biological_process	organic substance catabolic process	495	0.025	GO:1901575	Y1Y__18882_4	group1: disappeard at specific stages	level4
Y1Y__18882	biological_process	organic substance biosynthetic process	2795	0.1415	GO:1901576	Y1Y__18882_4	group1: disappeard at specific stages	level4
Y1Y__18916	biological_process	nucleobase-containing compound metabolic process	3510	0.1777	GO:0006139	Y1Y__18916_3	group1: disappeard at specific stages	level4
Y1Y__18916	biological_process	cellular aromatic compound metabolic process	3530	0.1787	GO:0006725	Y1Y__18916_3	group1: disappeard at specific stages	level4
Y1Y__18916	molecular_function	transferase activity, transferring phosphorus-containing groups	1843	0.0933	GO:0016772	Y1Y__18916_3	group1: disappeard at specific stages	level4
Y1Y__18916	molecular_function	hydrolase activity, acting on ester bonds	1071	0.0542	GO:0016788	Y1Y__18916_3	group1: disappeard at specific stages	level4
Y1Y__18916	molecular_function	DNA polymerase activity	1699	0.086	GO:0034061	Y1Y__18916_3	group1: disappeard at specific stages	level4
Y1Y__18916	biological_process	cellular nitrogen compound metabolic process	3572	0.1809	GO:0034641	Y1Y__18916_3	group1: disappeard at specific stages	level4
Y1Y__18916	biological_process	macromolecule metabolic process	3322	0.1682	GO:0043170	Y1Y__18916_3	group1: disappeard at specific stages	level4
Y1Y__18916	biological_process	cellular biosynthetic process	2795	0.1415	GO:0044249	Y1Y__18916_3	group1: disappeard at specific stages	level4
Y1Y__18916	biological_process	cellular macromolecule metabolic process	2995	0.1516	GO:0044260	Y1Y__18916_3	group1: disappeard at specific stages	level4
Y1Y__18916	biological_process	heterocycle metabolic process	3530	0.1787	GO:0046483	Y1Y__18916_3	group1: disappeard at specific stages	level4
Y1Y__18916	biological_process	organic cyclic compound metabolic process	3531	0.1788	GO:1901360	Y1Y__18916_3	group1: disappeard at specific stages	level4
Y1Y__18916	biological_process	organic substance biosynthetic process	2795	0.1415	GO:1901576	Y1Y__18916_3	group1: disappeard at specific stages	level4
Y1Y__19409	cellular_component	host cell part	1347	0.0682	GO:0033643	Y1Y__19409_4	group1: disappeard at specific stages	level4
Y1Y__19409	cellular_component	host cell	1348	0.0682	GO:0043657	Y1Y__19409_4	group1: disappeard at specific stages	level4
Y1Y__197	molecular_function	N-acetylmuramoyl-L-alanine amidase activity	31	0.0015	GO:0008745	Y1Y__197_3	group1: disappeard at specific stages	level4
Y1Y__197	biological_process	viral process	4311	0.2183	GO:0016032	Y1Y__197_3	group1: disappeard at specific stages	level4
Y1Y__197	molecular_function	hydrolase activity, acting on carbon-nitrogen (but not peptide) bonds	60	0.003	GO:0016810	Y1Y__197_3	group1: disappeard at specific stages	level4
Y1Y__197	biological_process	regulation of multi-organism process	74	0.0037	GO:0043900	Y1Y__197_3	group1: disappeard at specific stages	level4
Y1Y__197	biological_process	regulation of symbiotic process	73	0.0036	GO:0043903	Y1Y__197_3	group1: disappeard at specific stages	level4
Y1Y__197	biological_process	disruption of cells of other organism	86	0.0043	GO:0044364	Y1Y__197_3	group1: disappeard at specific stages	level4
Y1Y__197	biological_process	negative regulation of biological process	554	0.028	GO:0048519	Y1Y__197_3	group1: disappeard at specific stages	level4
Y1Y__197	biological_process	interaction with host	589	0.0298	GO:0051701	Y1Y__197_3	group1: disappeard at specific stages	level4
Y1Y__197	biological_process	modulation of process of other organism involved in symbiotic interaction	168	0.0085	GO:0051817	Y1Y__197_3	group1: disappeard at specific stages	level4
Y1Y__197	biological_process	killing of cells in other organism involved in symbiotic interaction	86	0.0043	GO:0051883	Y1Y__197_3	group1: disappeard at specific stages	level4
Y1Y__20450	molecular_function	ribonuclease activity	301	0.0152	GO:0004540	Y1Y__20450_3	group1: disappeard at specific stages	level4
Y1Y__20450	biological_process	nucleobase-containing compound metabolic process	3510	0.1777	GO:0006139	Y1Y__20450_3	group1: disappeard at specific stages	level4
Y1Y__20450	biological_process	cellular aromatic compound metabolic process	3530	0.1787	GO:0006725	Y1Y__20450_3	group1: disappeard at specific stages	level4
Y1Y__20450	biological_process	viral process	4311	0.2183	GO:0016032	Y1Y__20450_3	group1: disappeard at specific stages	level4
Y1Y__20450	molecular_function	transferase activity, transferring phosphorus-containing groups	1843	0.0933	GO:0016772	Y1Y__20450_3	group1: disappeard at specific stages	level4
Y1Y__20450	molecular_function	hydrolase activity, acting on ester bonds	1071	0.0542	GO:0016788	Y1Y__20450_3	group1: disappeard at specific stages	level4
Y1Y__20450	cellular_component	host cell part	1347	0.0682	GO:0033643	Y1Y__20450_3	group1: disappeard at specific stages	level4
Y1Y__20450	molecular_function	DNA polymerase activity	1699	0.086	GO:0034061	Y1Y__20450_3	group1: disappeard at specific stages	level4
Y1Y__20450	biological_process	cellular nitrogen compound metabolic process	3572	0.1809	GO:0034641	Y1Y__20450_3	group1: disappeard at specific stages	level4
Y1Y__20450	biological_process	macromolecule metabolic process	3322	0.1682	GO:0043170	Y1Y__20450_3	group1: disappeard at specific stages	level4
Y1Y__20450	cellular_component	host cell	1348	0.0682	GO:0043657	Y1Y__20450_3	group1: disappeard at specific stages	level4
Y1Y__20450	biological_process	cellular biosynthetic process	2795	0.1415	GO:0044249	Y1Y__20450_3	group1: disappeard at specific stages	level4
Y1Y__20450	biological_process	cellular macromolecule metabolic process	2995	0.1516	GO:0044260	Y1Y__20450_3	group1: disappeard at specific stages	level4
Y1Y__20450	biological_process	heterocycle metabolic process	3530	0.1787	GO:0046483	Y1Y__20450_3	group1: disappeard at specific stages	level4
Y1Y__20450	biological_process	organic cyclic compound metabolic process	3531	0.1788	GO:1901360	Y1Y__20450_3	group1: disappeard at specific stages	level4
Y1Y__20450	biological_process	organic substance biosynthetic process	2795	0.1415	GO:1901576	Y1Y__20450_3	group1: disappeard at specific stages	level4
Y1Y__20450	biological_process	response to salt	222	0.0112	GO:1902074	Y1Y__20450_3	group1: disappeard at specific stages	level4
Y1Y__21071	biological_process	nucleobase-containing compound metabolic process	3510	0.1777	GO:0006139	Y1Y__21071_2	group1: disappeard at specific stages	level4
Y1Y__21071	biological_process	cellular aromatic compound metabolic process	3530	0.1787	GO:0006725	Y1Y__21071_2	group1: disappeard at specific stages	level4
Y1Y__21071	biological_process	viral process	4311	0.2183	GO:0016032	Y1Y__21071_2	group1: disappeard at specific stages	level4
Y1Y__21071	molecular_function	transferase activity, transferring phosphorus-containing groups	1843	0.0933	GO:0016772	Y1Y__21071_2	group1: disappeard at specific stages	level4
Y1Y__21071	cellular_component	icosahedral viral capsid	296	0.0149	GO:0019030	Y1Y__21071_4	group1: disappeard at specific stages	level4
Y1Y__21071	molecular_function	DNA polymerase activity	1699	0.086	GO:0034061	Y1Y__21071_2	group1: disappeard at specific stages	level4
Y1Y__21071	biological_process	cellular nitrogen compound metabolic process	3572	0.1809	GO:0034641	Y1Y__21071_2	group1: disappeard at specific stages	level4
Y1Y__21071	biological_process	macromolecule metabolic process	3322	0.1682	GO:0043170	Y1Y__21071_2	group1: disappeard at specific stages	level4
Y1Y__21071	biological_process	cellular biosynthetic process	2795	0.1415	GO:0044249	Y1Y__21071_2	group1: disappeard at specific stages	level4
Y1Y__21071	biological_process	cellular macromolecule metabolic process	2995	0.1516	GO:0044260	Y1Y__21071_2	group1: disappeard at specific stages	level4
Y1Y__21071	biological_process	heterocycle metabolic process	3530	0.1787	GO:0046483	Y1Y__21071_2	group1: disappeard at specific stages	level4
Y1Y__21071	biological_process	organic cyclic compound metabolic process	3531	0.1788	GO:1901360	Y1Y__21071_2	group1: disappeard at specific stages	level4
Y1Y__21071	biological_process	organic substance biosynthetic process	2795	0.1415	GO:1901576	Y1Y__21071_2	group1: disappeard at specific stages	level4
Y1Y__2311	molecular_function	nucleic acid binding	1291	0.0653	GO:0003676	Y1Y__2311_2	group1: disappeard at specific stages	level4
Y1Y__2311	molecular_function	deoxyribonuclease activity	145	0.0073	GO:0004536	Y1Y__2311_2	group1: disappeard at specific stages	level4
Y1Y__2311	biological_process	nucleobase-containing compound metabolic process	3510	0.1777	GO:0006139	Y1Y__2311_2	group1: disappeard at specific stages	level4
Y1Y__2311	biological_process	cellular aromatic compound metabolic process	3530	0.1787	GO:0006725	Y1Y__2311_2	group1: disappeard at specific stages	level4
Y1Y__2311	molecular_function	hydrolase activity, acting on ester bonds	1071	0.0542	GO:0016788	Y1Y__2311_2	group1: disappeard at specific stages	level4
Y1Y__2311	biological_process	cellular nitrogen compound metabolic process	3572	0.1809	GO:0034641	Y1Y__2311_2	group1: disappeard at specific stages	level4
Y1Y__2311	biological_process	macromolecule metabolic process	3322	0.1682	GO:0043170	Y1Y__2311_2	group1: disappeard at specific stages	level4
Y1Y__2311	biological_process	cellular macromolecule metabolic process	2995	0.1516	GO:0044260	Y1Y__2311_2	group1: disappeard at specific stages	level4
Y1Y__2311	biological_process	heterocycle metabolic process	3530	0.1787	GO:0046483	Y1Y__2311_2	group1: disappeard at specific stages	level4
Y1Y__2311	biological_process	organic cyclic compound metabolic process	3531	0.1788	GO:1901360	Y1Y__2311_2	group1: disappeard at specific stages	level4
Y1Y__23439	molecular_function	ribonuclease activity	301	0.0152	GO:0004540	Y1Y__23439_2	group1: disappeard at specific stages	level4
Y1Y__23439	biological_process	nucleobase-containing compound metabolic process	3510	0.1777	GO:0006139	Y1Y__23439_2	group1: disappeard at specific stages	level4
Y1Y__23439	biological_process	cellular aromatic compound metabolic process	3530	0.1787	GO:0006725	Y1Y__23439_2	group1: disappeard at specific stages	level4
Y1Y__23439	biological_process	viral process	4311	0.2183	GO:0016032	Y1Y__23439_2	group1: disappeard at specific stages	level4
Y1Y__23439	molecular_function	transferase activity, transferring phosphorus-containing groups	1843	0.0933	GO:0016772	Y1Y__23439_2	group1: disappeard at specific stages	level4
Y1Y__23439	molecular_function	hydrolase activity, acting on ester bonds	1071	0.0542	GO:0016788	Y1Y__23439_2	group1: disappeard at specific stages	level4
Y1Y__23439	cellular_component	host cell part	1347	0.0682	GO:0033643	Y1Y__23439_2	group1: disappeard at specific stages	level4
Y1Y__23439	molecular_function	DNA polymerase activity	1699	0.086	GO:0034061	Y1Y__23439_2	group1: disappeard at specific stages	level4
Y1Y__23439	biological_process	cellular nitrogen compound metabolic process	3572	0.1809	GO:0034641	Y1Y__23439_2	group1: disappeard at specific stages	level4
Y1Y__23439	biological_process	macromolecule metabolic process	3322	0.1682	GO:0043170	Y1Y__23439_2	group1: disappeard at specific stages	level4
Y1Y__23439	cellular_component	host cell	1348	0.0682	GO:0043657	Y1Y__23439_2	group1: disappeard at specific stages	level4
Y1Y__23439	biological_process	cellular biosynthetic process	2795	0.1415	GO:0044249	Y1Y__23439_2	group1: disappeard at specific stages	level4
Y1Y__23439	biological_process	cellular macromolecule metabolic process	2995	0.1516	GO:0044260	Y1Y__23439_2	group1: disappeard at specific stages	level4
Y1Y__23439	biological_process	heterocycle metabolic process	3530	0.1787	GO:0046483	Y1Y__23439_2	group1: disappeard at specific stages	level4
Y1Y__23439	biological_process	organic cyclic compound metabolic process	3531	0.1788	GO:1901360	Y1Y__23439_2	group1: disappeard at specific stages	level4
Y1Y__23439	biological_process	organic substance biosynthetic process	2795	0.1415	GO:1901576	Y1Y__23439_2	group1: disappeard at specific stages	level4
Y1Y__23439	biological_process	response to salt	222	0.0112	GO:1902074	Y1Y__23439_2	group1: disappeard at specific stages	level4
Y1Y__25273	biological_process	nucleobase-containing compound metabolic process	3510	0.1777	GO:0006139	Y1Y__25273_6	group1: disappeard at specific stages	level4
Y1Y__25273	biological_process	cellular aromatic compound metabolic process	3530	0.1787	GO:0006725	Y1Y__25273_6	group1: disappeard at specific stages	level4
Y1Y__25273	biological_process	viral process	4311	0.2183	GO:0016032	Y1Y__25273_6	group1: disappeard at specific stages	level4
Y1Y__25273	molecular_function	transferase activity, transferring phosphorus-containing groups	1843	0.0933	GO:0016772	Y1Y__25273_6	group1: disappeard at specific stages	level4
Y1Y__25273	molecular_function	DNA polymerase activity	1699	0.086	GO:0034061	Y1Y__25273_6	group1: disappeard at specific stages	level4
Y1Y__25273	biological_process	cellular nitrogen compound metabolic process	3572	0.1809	GO:0034641	Y1Y__25273_6	group1: disappeard at specific stages	level4
Y1Y__25273	biological_process	macromolecule metabolic process	3322	0.1682	GO:0043170	Y1Y__25273_6	group1: disappeard at specific stages	level4
Y1Y__25273	biological_process	cellular biosynthetic process	2795	0.1415	GO:0044249	Y1Y__25273_6	group1: disappeard at specific stages	level4
Y1Y__25273	biological_process	cellular macromolecule metabolic process	2995	0.1516	GO:0044260	Y1Y__25273_6	group1: disappeard at specific stages	level4
Y1Y__25273	biological_process	heterocycle metabolic process	3530	0.1787	GO:0046483	Y1Y__25273_6	group1: disappeard at specific stages	level4
Y1Y__25273	biological_process	organic cyclic compound metabolic process	3531	0.1788	GO:1901360	Y1Y__25273_6	group1: disappeard at specific stages	level4
Y1Y__25273	biological_process	organic substance biosynthetic process	2795	0.1415	GO:1901576	Y1Y__25273_6	group1: disappeard at specific stages	level4
Y1Y__25570	biological_process	nucleobase-containing compound metabolic process	3510	0.1777	GO:0006139	Y1Y__25570_4	group1: disappeard at specific stages	level4
Y1Y__25570	biological_process	cellular aromatic compound metabolic process	3530	0.1787	GO:0006725	Y1Y__25570_4	group1: disappeard at specific stages	level4
Y1Y__25570	biological_process	phosphorus metabolic process	512	0.0259	GO:0006793	Y1Y__25570_4	group1: disappeard at specific stages	level4
Y1Y__25570	molecular_function	hydrolase activity, acting on acid anhydrides	1713	0.0867	GO:0016817	Y1Y__25570_4	group1: disappeard at specific stages	level4
Y1Y__25570	biological_process	organophosphate metabolic process	466	0.0236	GO:0019637	Y1Y__25570_4	group1: disappeard at specific stages	level4
Y1Y__25570	biological_process	cellular nitrogen compound metabolic process	3572	0.1809	GO:0034641	Y1Y__25570_4	group1: disappeard at specific stages	level4
Y1Y__25570	molecular_function	cation binding	645	0.0326	GO:0043169	Y1Y__25570_4	group1: disappeard at specific stages	level4
Y1Y__25570	cellular_component	membrane-bounded organelle	254	0.0128	GO:0043227	Y1Y__25570_4	group1: disappeard at specific stages	level4
Y1Y__25570	cellular_component	intracellular organelle	246	0.0124	GO:0043229	Y1Y__25570_4	group1: disappeard at specific stages	level4
Y1Y__25570	biological_process	cellular catabolic process	418	0.0211	GO:0044248	Y1Y__25570_4	group1: disappeard at specific stages	level4
Y1Y__25570	biological_process	cellular biosynthetic process	2795	0.1415	GO:0044249	Y1Y__25570_4	group1: disappeard at specific stages	level4
Y1Y__25570	biological_process	small molecule biosynthetic process	314	0.0159	GO:0044283	Y1Y__25570_4	group1: disappeard at specific stages	level4
Y1Y__25570	biological_process	heterocycle metabolic process	3530	0.1787	GO:0046483	Y1Y__25570_4	group1: disappeard at specific stages	level4
Y1Y__25570	biological_process	nucleobase-containing small molecule metabolic process	469	0.0237	GO:0055086	Y1Y__25570_4	group1: disappeard at specific stages	level4
Y1Y__25570	biological_process	carbohydrate derivative metabolic process	537	0.0271	GO:1901135	Y1Y__25570_4	group1: disappeard at specific stages	level4
Y1Y__25570	biological_process	organic cyclic compound metabolic process	3531	0.1788	GO:1901360	Y1Y__25570_4	group1: disappeard at specific stages	level4
Y1Y__25570	biological_process	organonitrogen compound metabolic process	671	0.0339	GO:1901564	Y1Y__25570_4	group1: disappeard at specific stages	level4
Y1Y__25570	biological_process	organic substance catabolic process	495	0.025	GO:1901575	Y1Y__25570_4	group1: disappeard at specific stages	level4
Y1Y__25570	biological_process	organic substance biosynthetic process	2795	0.1415	GO:1901576	Y1Y__25570_4	group1: disappeard at specific stages	level4
Y1Y__26745	biological_process	nucleobase-containing compound metabolic process	3510	0.1777	GO:0006139	Y1Y__26745_3	group1: disappeard at specific stages	level4
Y1Y__26745	biological_process	cellular aromatic compound metabolic process	3530	0.1787	GO:0006725	Y1Y__26745_3	group1: disappeard at specific stages	level4
Y1Y__26745	biological_process	cellular nitrogen compound metabolic process	3572	0.1809	GO:0034641	Y1Y__26745_3	group1: disappeard at specific stages	level4
Y1Y__26745	biological_process	macromolecule metabolic process	3322	0.1682	GO:0043170	Y1Y__26745_3	group1: disappeard at specific stages	level4
Y1Y__26745	biological_process	cellular macromolecule metabolic process	2995	0.1516	GO:0044260	Y1Y__26745_3	group1: disappeard at specific stages	level4
Y1Y__26745	biological_process	heterocycle metabolic process	3530	0.1787	GO:0046483	Y1Y__26745_3	group1: disappeard at specific stages	level4
Y1Y__26745	biological_process	organic cyclic compound metabolic process	3531	0.1788	GO:1901360	Y1Y__26745_3	group1: disappeard at specific stages	level4
Y1Y__27667	molecular_function	nucleic acid binding	1291	0.0653	GO:0003676	Y1Y__27667_5	group1: disappeard at specific stages	level4
Y1Y__27667	biological_process	nucleobase-containing compound metabolic process	3510	0.1777	GO:0006139	Y1Y__27667_2	group1: disappeard at specific stages	level4
Y1Y__27667	biological_process	nucleobase-containing compound metabolic process	3510	0.1777	GO:0006139	Y1Y__27667_5	group1: disappeard at specific stages	level4
Y1Y__27667	biological_process	cellular aromatic compound metabolic process	3530	0.1787	GO:0006725	Y1Y__27667_2	group1: disappeard at specific stages	level4
Y1Y__27667	biological_process	cellular aromatic compound metabolic process	3530	0.1787	GO:0006725	Y1Y__27667_5	group1: disappeard at specific stages	level4
Y1Y__27667	biological_process	phosphorus metabolic process	512	0.0259	GO:0006793	Y1Y__27667_2	group1: disappeard at specific stages	level4
Y1Y__27667	biological_process	cellular component organization	509	0.0257	GO:0016043	Y1Y__27667_5	group1: disappeard at specific stages	level4
Y1Y__27667	molecular_function	hydrolase activity, acting on acid anhydrides	1713	0.0867	GO:0016817	Y1Y__27667_2	group1: disappeard at specific stages	level4
Y1Y__27667	biological_process	organophosphate metabolic process	466	0.0236	GO:0019637	Y1Y__27667_2	group1: disappeard at specific stages	level4
Y1Y__27667	biological_process	cellular response to stress	530	0.0268	GO:0033554	Y1Y__27667_5	group1: disappeard at specific stages	level4
Y1Y__27667	biological_process	cellular nitrogen compound metabolic process	3572	0.1809	GO:0034641	Y1Y__27667_2	group1: disappeard at specific stages	level4
Y1Y__27667	biological_process	cellular nitrogen compound metabolic process	3572	0.1809	GO:0034641	Y1Y__27667_5	group1: disappeard at specific stages	level4
Y1Y__27667	molecular_function	cation binding	645	0.0326	GO:0043169	Y1Y__27667_2	group1: disappeard at specific stages	level4
Y1Y__27667	biological_process	macromolecule metabolic process	3322	0.1682	GO:0043170	Y1Y__27667_5	group1: disappeard at specific stages	level4
Y1Y__27667	biological_process	cellular catabolic process	418	0.0211	GO:0044248	Y1Y__27667_2	group1: disappeard at specific stages	level4
Y1Y__27667	biological_process	cellular biosynthetic process	2795	0.1415	GO:0044249	Y1Y__27667_2	group1: disappeard at specific stages	level4
Y1Y__27667	biological_process	cellular biosynthetic process	2795	0.1415	GO:0044249	Y1Y__27667_5	group1: disappeard at specific stages	level4
Y1Y__27667	biological_process	cellular macromolecule metabolic process	2995	0.1516	GO:0044260	Y1Y__27667_5	group1: disappeard at specific stages	level4
Y1Y__27667	biological_process	small molecule biosynthetic process	314	0.0159	GO:0044283	Y1Y__27667_2	group1: disappeard at specific stages	level4
Y1Y__27667	biological_process	heterocycle metabolic process	3530	0.1787	GO:0046483	Y1Y__27667_2	group1: disappeard at specific stages	level4
Y1Y__27667	biological_process	heterocycle metabolic process	3530	0.1787	GO:0046483	Y1Y__27667_5	group1: disappeard at specific stages	level4
Y1Y__27667	biological_process	nucleobase-containing small molecule metabolic process	469	0.0237	GO:0055086	Y1Y__27667_2	group1: disappeard at specific stages	level4
Y1Y__27667	biological_process	carbohydrate derivative metabolic process	537	0.0271	GO:1901135	Y1Y__27667_2	group1: disappeard at specific stages	level4
Y1Y__27667	biological_process	organic cyclic compound metabolic process	3531	0.1788	GO:1901360	Y1Y__27667_2	group1: disappeard at specific stages	level4
Y1Y__27667	biological_process	organic cyclic compound metabolic process	3531	0.1788	GO:1901360	Y1Y__27667_5	group1: disappeard at specific stages	level4
Y1Y__27667	biological_process	organonitrogen compound metabolic process	671	0.0339	GO:1901564	Y1Y__27667_2	group1: disappeard at specific stages	level4
Y1Y__27667	biological_process	organic substance catabolic process	495	0.025	GO:1901575	Y1Y__27667_2	group1: disappeard at specific stages	level4
Y1Y__27667	biological_process	organic substance biosynthetic process	2795	0.1415	GO:1901576	Y1Y__27667_2	group1: disappeard at specific stages	level4
Y1Y__27667	biological_process	organic substance biosynthetic process	2795	0.1415	GO:1901576	Y1Y__27667_5	group1: disappeard at specific stages	level4
Y1Y__29024	biological_process	nucleobase-containing compound metabolic process	3510	0.1777	GO:0006139	Y1Y__29024_4	group1: disappeard at specific stages	level4
Y1Y__29024	biological_process	cellular aromatic compound metabolic process	3530	0.1787	GO:0006725	Y1Y__29024_4	group1: disappeard at specific stages	level4
Y1Y__29024	biological_process	cellular nitrogen compound metabolic process	3572	0.1809	GO:0034641	Y1Y__29024_4	group1: disappeard at specific stages	level4
Y1Y__29024	biological_process	macromolecule metabolic process	3322	0.1682	GO:0043170	Y1Y__29024_4	group1: disappeard at specific stages	level4
Y1Y__29024	biological_process	cellular biosynthetic process	2795	0.1415	GO:0044249	Y1Y__29024_4	group1: disappeard at specific stages	level4
Y1Y__29024	biological_process	cellular macromolecule metabolic process	2995	0.1516	GO:0044260	Y1Y__29024_4	group1: disappeard at specific stages	level4
Y1Y__29024	biological_process	heterocycle metabolic process	3530	0.1787	GO:0046483	Y1Y__29024_4	group1: disappeard at specific stages	level4
Y1Y__29024	biological_process	organic cyclic compound metabolic process	3531	0.1788	GO:1901360	Y1Y__29024_4	group1: disappeard at specific stages	level4
Y1Y__29024	biological_process	organic substance biosynthetic process	2795	0.1415	GO:1901576	Y1Y__29024_4	group1: disappeard at specific stages	level4
Y1Y__29216	molecular_function	DNA helicase activity	130	0.0065	GO:0003678	Y1Y__29216_2	group1: disappeard at specific stages	level4
Y1Y__29216	biological_process	nucleobase-containing compound metabolic process	3510	0.1777	GO:0006139	Y1Y__29216_2	group1: disappeard at specific stages	level4
Y1Y__29216	biological_process	cellular aromatic compound metabolic process	3530	0.1787	GO:0006725	Y1Y__29216_2	group1: disappeard at specific stages	level4
Y1Y__29216	biological_process	cellular component organization	509	0.0257	GO:0016043	Y1Y__29216_2	group1: disappeard at specific stages	level4
Y1Y__29216	molecular_function	hydrolase activity, acting on acid anhydrides	1713	0.0867	GO:0016817	Y1Y__29216_2	group1: disappeard at specific stages	level4
Y1Y__29216	biological_process	cellular nitrogen compound metabolic process	3572	0.1809	GO:0034641	Y1Y__29216_2	group1: disappeard at specific stages	level4
Y1Y__29216	biological_process	macromolecule metabolic process	3322	0.1682	GO:0043170	Y1Y__29216_2	group1: disappeard at specific stages	level4
Y1Y__29216	biological_process	cellular biosynthetic process	2795	0.1415	GO:0044249	Y1Y__29216_2	group1: disappeard at specific stages	level4
Y1Y__29216	biological_process	cellular macromolecule metabolic process	2995	0.1516	GO:0044260	Y1Y__29216_2	group1: disappeard at specific stages	level4
Y1Y__29216	biological_process	heterocycle metabolic process	3530	0.1787	GO:0046483	Y1Y__29216_2	group1: disappeard at specific stages	level4
Y1Y__29216	biological_process	organic cyclic compound metabolic process	3531	0.1788	GO:1901360	Y1Y__29216_2	group1: disappeard at specific stages	level4
Y1Y__29216	biological_process	organic substance biosynthetic process	2795	0.1415	GO:1901576	Y1Y__29216_2	group1: disappeard at specific stages	level4
Y1Y__30139	biological_process	nucleobase-containing compound metabolic process	3510	0.1777	GO:0006139	Y1Y__30139_1	group1: disappeard at specific stages	level4
Y1Y__30139	biological_process	cellular aromatic compound metabolic process	3530	0.1787	GO:0006725	Y1Y__30139_1	group1: disappeard at specific stages	level4
Y1Y__30139	biological_process	viral process	4311	0.2183	GO:0016032	Y1Y__30139_1	group1: disappeard at specific stages	level4
Y1Y__30139	biological_process	viral process	4311	0.2183	GO:0016032	Y1Y__30139_5	group1: disappeard at specific stages	level4
Y1Y__30139	molecular_function	transferase activity, transferring phosphorus-containing groups	1843	0.0933	GO:0016772	Y1Y__30139_1	group1: disappeard at specific stages	level4
Y1Y__30139	cellular_component	host cell part	1347	0.0682	GO:0033643	Y1Y__30139_9	group1: disappeard at specific stages	level4
Y1Y__30139	molecular_function	DNA polymerase activity	1699	0.086	GO:0034061	Y1Y__30139_1	group1: disappeard at specific stages	level4
Y1Y__30139	biological_process	cellular nitrogen compound metabolic process	3572	0.1809	GO:0034641	Y1Y__30139_1	group1: disappeard at specific stages	level4
Y1Y__30139	biological_process	macromolecule metabolic process	3322	0.1682	GO:0043170	Y1Y__30139_1	group1: disappeard at specific stages	level4
Y1Y__30139	cellular_component	host cell	1348	0.0682	GO:0043657	Y1Y__30139_9	group1: disappeard at specific stages	level4
Y1Y__30139	biological_process	cellular biosynthetic process	2795	0.1415	GO:0044249	Y1Y__30139_1	group1: disappeard at specific stages	level4
Y1Y__30139	biological_process	cellular macromolecule metabolic process	2995	0.1516	GO:0044260	Y1Y__30139_1	group1: disappeard at specific stages	level4
Y1Y__30139	biological_process	heterocycle metabolic process	3530	0.1787	GO:0046483	Y1Y__30139_1	group1: disappeard at specific stages	level4
Y1Y__30139	biological_process	organic cyclic compound metabolic process	3531	0.1788	GO:1901360	Y1Y__30139_1	group1: disappeard at specific stages	level4
Y1Y__30139	biological_process	organic substance biosynthetic process	2795	0.1415	GO:1901576	Y1Y__30139_1	group1: disappeard at specific stages	level4
Y1Y__30754	biological_process	nucleobase-containing compound metabolic process	3510	0.1777	GO:0006139	Y1Y__30754_7	group1: disappeard at specific stages	level4
Y1Y__30754	biological_process	cellular aromatic compound metabolic process	3530	0.1787	GO:0006725	Y1Y__30754_7	group1: disappeard at specific stages	level4
Y1Y__30754	molecular_function	transferase activity, transferring phosphorus-containing groups	1843	0.0933	GO:0016772	Y1Y__30754_7	group1: disappeard at specific stages	level4
Y1Y__30754	molecular_function	hydrolase activity, acting on ester bonds	1071	0.0542	GO:0016788	Y1Y__30754_7	group1: disappeard at specific stages	level4
Y1Y__30754	molecular_function	DNA polymerase activity	1699	0.086	GO:0034061	Y1Y__30754_7	group1: disappeard at specific stages	level4
Y1Y__30754	biological_process	cellular nitrogen compound metabolic process	3572	0.1809	GO:0034641	Y1Y__30754_7	group1: disappeard at specific stages	level4
Y1Y__30754	biological_process	macromolecule metabolic process	3322	0.1682	GO:0043170	Y1Y__30754_7	group1: disappeard at specific stages	level4
Y1Y__30754	biological_process	cellular biosynthetic process	2795	0.1415	GO:0044249	Y1Y__30754_7	group1: disappeard at specific stages	level4
Y1Y__30754	biological_process	cellular macromolecule metabolic process	2995	0.1516	GO:0044260	Y1Y__30754_7	group1: disappeard at specific stages	level4
Y1Y__30754	biological_process	heterocycle metabolic process	3530	0.1787	GO:0046483	Y1Y__30754_7	group1: disappeard at specific stages	level4
Y1Y__30754	biological_process	organic cyclic compound metabolic process	3531	0.1788	GO:1901360	Y1Y__30754_7	group1: disappeard at specific stages	level4
Y1Y__30754	biological_process	organic substance biosynthetic process	2795	0.1415	GO:1901576	Y1Y__30754_7	group1: disappeard at specific stages	level4
Y1Y__30768	molecular_function	nucleotide binding	421	0.0213	GO:0000166	Y1Y__30768_5	group1: disappeard at specific stages	level4
Y1Y__30768	molecular_function	DNA topoisomerase activity	92	0.0046	GO:0003916	Y1Y__30768_5	group1: disappeard at specific stages	level4
Y1Y__30768	cellular_component	cell wall	205	0.0103	GO:0005618	Y1Y__30768_5	group1: disappeard at specific stages	level4
Y1Y__30768	cellular_component	plasma membrane	344	0.0174	GO:0005886	Y1Y__30768_5	group1: disappeard at specific stages	level4
Y1Y__30768	biological_process	nucleobase-containing compound metabolic process	3510	0.1777	GO:0006139	Y1Y__30768_5	group1: disappeard at specific stages	level4
Y1Y__30768	biological_process	cellular aromatic compound metabolic process	3530	0.1787	GO:0006725	Y1Y__30768_5	group1: disappeard at specific stages	level4
Y1Y__30768	biological_process	cellular component organization	509	0.0257	GO:0016043	Y1Y__30768_5	group1: disappeard at specific stages	level4
Y1Y__30768	molecular_function	hydrolase activity, acting on acid anhydrides	1713	0.0867	GO:0016817	Y1Y__30768_5	group1: disappeard at specific stages	level4
Y1Y__30768	molecular_function	ribonucleotide binding	353	0.0178	GO:0032553	Y1Y__30768_5	group1: disappeard at specific stages	level4
Y1Y__30768	biological_process	cellular nitrogen compound metabolic process	3572	0.1809	GO:0034641	Y1Y__30768_5	group1: disappeard at specific stages	level4
Y1Y__30768	molecular_function	anion binding	423	0.0214	GO:0043168	Y1Y__30768_5	group1: disappeard at specific stages	level4
Y1Y__30768	molecular_function	cation binding	645	0.0326	GO:0043169	Y1Y__30768_5	group1: disappeard at specific stages	level4
Y1Y__30768	biological_process	macromolecule metabolic process	3322	0.1682	GO:0043170	Y1Y__30768_5	group1: disappeard at specific stages	level4
Y1Y__30768	biological_process	cellular macromolecule metabolic process	2995	0.1516	GO:0044260	Y1Y__30768_5	group1: disappeard at specific stages	level4
Y1Y__30768	biological_process	heterocycle metabolic process	3530	0.1787	GO:0046483	Y1Y__30768_5	group1: disappeard at specific stages	level4
Y1Y__30768	molecular_function	nucleoside phosphate binding	421	0.0213	GO:1901265	Y1Y__30768_5	group1: disappeard at specific stages	level4
Y1Y__30768	biological_process	organic cyclic compound metabolic process	3531	0.1788	GO:1901360	Y1Y__30768_5	group1: disappeard at specific stages	level4
Y1Y__31628	biological_process	viral process	4311	0.2183	GO:0016032	Y1Y__31628_5	group1: disappeard at specific stages	level4
Y1Y__31628	biological_process	cellular component organization	509	0.0257	GO:0016043	Y1Y__31628_5	group1: disappeard at specific stages	level4
Y1Y__31628	cellular_component	icosahedral viral capsid	296	0.0149	GO:0019030	Y1Y__31628_5	group1: disappeard at specific stages	level4
Y1Y__31628	molecular_function	identical protein binding	443	0.0224	GO:0042802	Y1Y__31628_5	group1: disappeard at specific stages	level4
Y1Y__31628	biological_process	cellular component biogenesis	182	0.0092	GO:0044085	Y1Y__31628_5	group1: disappeard at specific stages	level4
Y1Y__31628	molecular_function	protein dimerization activity	76	0.0038	GO:0046983	Y1Y__31628_5	group1: disappeard at specific stages	level4
Y1Y__34339	cellular_component	outer membrane	124	0.0062	GO:0019867	Y1Y__34339_3	group1: disappeard at specific stages	level4
Y1Y__34339	cellular_component	cell envelope	136	0.0068	GO:0030313	Y1Y__34339_3	group1: disappeard at specific stages	level4
Y1Y__34339	biological_process	cell-substrate adhesion	78	0.0039	GO:0031589	Y1Y__34339_3	group1: disappeard at specific stages	level4
Y1Y__34339	biological_process	interaction with host	589	0.0298	GO:0051701	Y1Y__34339_3	group1: disappeard at specific stages	level4
Y1Y__34339	biological_process	aggregation of unicellular organisms	78	0.0039	GO:0098630	Y1Y__34339_3	group1: disappeard at specific stages	level4
Y1Y__34651	biological_process	nucleobase-containing compound metabolic process	3510	0.1777	GO:0006139	Y1Y__34651_4	group1: disappeard at specific stages	level4
Y1Y__34651	biological_process	cellular aromatic compound metabolic process	3530	0.1787	GO:0006725	Y1Y__34651_4	group1: disappeard at specific stages	level4
Y1Y__34651	biological_process	cellular nitrogen compound metabolic process	3572	0.1809	GO:0034641	Y1Y__34651_4	group1: disappeard at specific stages	level4
Y1Y__34651	biological_process	macromolecule metabolic process	3322	0.1682	GO:0043170	Y1Y__34651_4	group1: disappeard at specific stages	level4
Y1Y__34651	biological_process	cellular macromolecule metabolic process	2995	0.1516	GO:0044260	Y1Y__34651_4	group1: disappeard at specific stages	level4
Y1Y__34651	biological_process	heterocycle metabolic process	3530	0.1787	GO:0046483	Y1Y__34651_4	group1: disappeard at specific stages	level4
Y1Y__34651	biological_process	organic cyclic compound metabolic process	3531	0.1788	GO:1901360	Y1Y__34651_4	group1: disappeard at specific stages	level4
Y1Y__35122	molecular_function	nucleic acid binding	1291	0.0653	GO:0003676	Y1Y__35122_2	group1: disappeard at specific stages	level4
Y1Y__35122	biological_process	nucleobase-containing compound metabolic process	3510	0.1777	GO:0006139	Y1Y__35122_3	group1: disappeard at specific stages	level4
Y1Y__35122	biological_process	cellular aromatic compound metabolic process	3530	0.1787	GO:0006725	Y1Y__35122_3	group1: disappeard at specific stages	level4
Y1Y__35122	biological_process	viral process	4311	0.2183	GO:0016032	Y1Y__35122_2	group1: disappeard at specific stages	level4
Y1Y__35122	biological_process	viral process	4311	0.2183	GO:0016032	Y1Y__35122_3	group1: disappeard at specific stages	level4
Y1Y__35122	molecular_function	transferase activity, transferring phosphorus-containing groups	1843	0.0933	GO:0016772	Y1Y__35122_3	group1: disappeard at specific stages	level4
Y1Y__35122	molecular_function	hydrolase activity, acting on acid anhydrides	1713	0.0867	GO:0016817	Y1Y__35122_2	group1: disappeard at specific stages	level4
Y1Y__35122	molecular_function	DNA polymerase activity	1699	0.086	GO:0034061	Y1Y__35122_3	group1: disappeard at specific stages	level4
Y1Y__35122	biological_process	cellular nitrogen compound metabolic process	3572	0.1809	GO:0034641	Y1Y__35122_3	group1: disappeard at specific stages	level4
Y1Y__35122	biological_process	macromolecule metabolic process	3322	0.1682	GO:0043170	Y1Y__35122_3	group1: disappeard at specific stages	level4
Y1Y__35122	biological_process	cellular biosynthetic process	2795	0.1415	GO:0044249	Y1Y__35122_3	group1: disappeard at specific stages	level4
Y1Y__35122	biological_process	cellular macromolecule metabolic process	2995	0.1516	GO:0044260	Y1Y__35122_3	group1: disappeard at specific stages	level4
Y1Y__35122	biological_process	heterocycle metabolic process	3530	0.1787	GO:0046483	Y1Y__35122_3	group1: disappeard at specific stages	level4
Y1Y__35122	biological_process	organic cyclic compound metabolic process	3531	0.1788	GO:1901360	Y1Y__35122_3	group1: disappeard at specific stages	level4
Y1Y__35122	biological_process	organic substance biosynthetic process	2795	0.1415	GO:1901576	Y1Y__35122_3	group1: disappeard at specific stages	level4
Y1Y__35656	molecular_function	nucleic acid binding	1291	0.0653	GO:0003676	Y1Y__35656_3	group1: disappeard at specific stages	level4
Y1Y__35656	biological_process	nucleobase-containing compound metabolic process	3510	0.1777	GO:0006139	Y1Y__35656_2	group1: disappeard at specific stages	level4
Y1Y__35656	biological_process	cellular aromatic compound metabolic process	3530	0.1787	GO:0006725	Y1Y__35656_2	group1: disappeard at specific stages	level4
Y1Y__35656	biological_process	viral process	4311	0.2183	GO:0016032	Y1Y__35656_2	group1: disappeard at specific stages	level4
Y1Y__35656	biological_process	viral process	4311	0.2183	GO:0016032	Y1Y__35656_3	group1: disappeard at specific stages	level4
Y1Y__35656	molecular_function	transferase activity, transferring phosphorus-containing groups	1843	0.0933	GO:0016772	Y1Y__35656_2	group1: disappeard at specific stages	level4
Y1Y__35656	molecular_function	hydrolase activity, acting on acid anhydrides	1713	0.0867	GO:0016817	Y1Y__35656_3	group1: disappeard at specific stages	level4
Y1Y__35656	molecular_function	DNA polymerase activity	1699	0.086	GO:0034061	Y1Y__35656_2	group1: disappeard at specific stages	level4
Y1Y__35656	biological_process	cellular nitrogen compound metabolic process	3572	0.1809	GO:0034641	Y1Y__35656_2	group1: disappeard at specific stages	level4
Y1Y__35656	biological_process	macromolecule metabolic process	3322	0.1682	GO:0043170	Y1Y__35656_2	group1: disappeard at specific stages	level4
Y1Y__35656	biological_process	cellular biosynthetic process	2795	0.1415	GO:0044249	Y1Y__35656_2	group1: disappeard at specific stages	level4
Y1Y__35656	biological_process	cellular macromolecule metabolic process	2995	0.1516	GO:0044260	Y1Y__35656_2	group1: disappeard at specific stages	level4
Y1Y__35656	biological_process	heterocycle metabolic process	3530	0.1787	GO:0046483	Y1Y__35656_2	group1: disappeard at specific stages	level4
Y1Y__35656	biological_process	organic cyclic compound metabolic process	3531	0.1788	GO:1901360	Y1Y__35656_2	group1: disappeard at specific stages	level4
Y1Y__35656	biological_process	organic substance biosynthetic process	2795	0.1415	GO:1901576	Y1Y__35656_2	group1: disappeard at specific stages	level4
Y1Y__36103	molecular_function	nucleic acid binding	1291	0.0653	GO:0003676	Y1Y__36103_2	group1: disappeard at specific stages	level4
Y1Y__36103	biological_process	nucleobase-containing compound metabolic process	3510	0.1777	GO:0006139	Y1Y__36103_1	group1: disappeard at specific stages	level4
Y1Y__36103	biological_process	cellular aromatic compound metabolic process	3530	0.1787	GO:0006725	Y1Y__36103_1	group1: disappeard at specific stages	level4
Y1Y__36103	biological_process	viral process	4311	0.2183	GO:0016032	Y1Y__36103_1	group1: disappeard at specific stages	level4
Y1Y__36103	biological_process	viral process	4311	0.2183	GO:0016032	Y1Y__36103_2	group1: disappeard at specific stages	level4
Y1Y__36103	molecular_function	transferase activity, transferring phosphorus-containing groups	1843	0.0933	GO:0016772	Y1Y__36103_1	group1: disappeard at specific stages	level4
Y1Y__36103	molecular_function	hydrolase activity, acting on acid anhydrides	1713	0.0867	GO:0016817	Y1Y__36103_2	group1: disappeard at specific stages	level4
Y1Y__36103	molecular_function	DNA polymerase activity	1699	0.086	GO:0034061	Y1Y__36103_1	group1: disappeard at specific stages	level4
Y1Y__36103	biological_process	cellular nitrogen compound metabolic process	3572	0.1809	GO:0034641	Y1Y__36103_1	group1: disappeard at specific stages	level4
Y1Y__36103	biological_process	macromolecule metabolic process	3322	0.1682	GO:0043170	Y1Y__36103_1	group1: disappeard at specific stages	level4
Y1Y__36103	biological_process	cellular biosynthetic process	2795	0.1415	GO:0044249	Y1Y__36103_1	group1: disappeard at specific stages	level4
Y1Y__36103	biological_process	cellular macromolecule metabolic process	2995	0.1516	GO:0044260	Y1Y__36103_1	group1: disappeard at specific stages	level4
Y1Y__36103	biological_process	heterocycle metabolic process	3530	0.1787	GO:0046483	Y1Y__36103_1	group1: disappeard at specific stages	level4
Y1Y__36103	biological_process	organic cyclic compound metabolic process	3531	0.1788	GO:1901360	Y1Y__36103_1	group1: disappeard at specific stages	level4
Y1Y__36103	biological_process	organic substance biosynthetic process	2795	0.1415	GO:1901576	Y1Y__36103_1	group1: disappeard at specific stages	level4
Y1Y__36377	biological_process	nucleobase-containing compound metabolic process	3510	0.1777	GO:0006139	Y1Y__36377_11	group1: disappeard at specific stages	level4
Y1Y__36377	biological_process	cellular aromatic compound metabolic process	3530	0.1787	GO:0006725	Y1Y__36377_11	group1: disappeard at specific stages	level4
Y1Y__36377	biological_process	viral process	4311	0.2183	GO:0016032	Y1Y__36377_11	group1: disappeard at specific stages	level4
Y1Y__36377	biological_process	viral process	4311	0.2183	GO:0016032	Y1Y__36377_20	group1: disappeard at specific stages	level4
Y1Y__36377	molecular_function	transferase activity, transferring phosphorus-containing groups	1843	0.0933	GO:0016772	Y1Y__36377_11	group1: disappeard at specific stages	level4
Y1Y__36377	cellular_component	icosahedral viral capsid	296	0.0149	GO:0019030	Y1Y__36377_18	group1: disappeard at specific stages	level4
Y1Y__36377	molecular_function	DNA polymerase activity	1699	0.086	GO:0034061	Y1Y__36377_11	group1: disappeard at specific stages	level4
Y1Y__36377	biological_process	cellular nitrogen compound metabolic process	3572	0.1809	GO:0034641	Y1Y__36377_11	group1: disappeard at specific stages	level4
Y1Y__36377	biological_process	macromolecule metabolic process	3322	0.1682	GO:0043170	Y1Y__36377_11	group1: disappeard at specific stages	level4
Y1Y__36377	biological_process	cellular biosynthetic process	2795	0.1415	GO:0044249	Y1Y__36377_11	group1: disappeard at specific stages	level4
Y1Y__36377	biological_process	cellular macromolecule metabolic process	2995	0.1516	GO:0044260	Y1Y__36377_11	group1: disappeard at specific stages	level4
Y1Y__36377	biological_process	heterocycle metabolic process	3530	0.1787	GO:0046483	Y1Y__36377_11	group1: disappeard at specific stages	level4
Y1Y__36377	biological_process	organic cyclic compound metabolic process	3531	0.1788	GO:1901360	Y1Y__36377_11	group1: disappeard at specific stages	level4
Y1Y__36377	biological_process	organic substance biosynthetic process	2795	0.1415	GO:1901576	Y1Y__36377_11	group1: disappeard at specific stages	level4
Y1Y__36633	biological_process	nucleobase-containing compound metabolic process	3510	0.1777	GO:0006139	Y1Y__36633_7	group1: disappeard at specific stages	level4
Y1Y__36633	biological_process	cellular aromatic compound metabolic process	3530	0.1787	GO:0006725	Y1Y__36633_7	group1: disappeard at specific stages	level4
Y1Y__36633	biological_process	phosphorus metabolic process	512	0.0259	GO:0006793	Y1Y__36633_7	group1: disappeard at specific stages	level4
Y1Y__36633	biological_process	cellular component organization	509	0.0257	GO:0016043	Y1Y__36633_7	group1: disappeard at specific stages	level4
Y1Y__36633	molecular_function	hydrolase activity, acting on acid anhydrides	1713	0.0867	GO:0016817	Y1Y__36633_7	group1: disappeard at specific stages	level4
Y1Y__36633	biological_process	organophosphate metabolic process	466	0.0236	GO:0019637	Y1Y__36633_7	group1: disappeard at specific stages	level4
Y1Y__36633	biological_process	cellular nitrogen compound metabolic process	3572	0.1809	GO:0034641	Y1Y__36633_7	group1: disappeard at specific stages	level4
Y1Y__36633	molecular_function	cation binding	645	0.0326	GO:0043169	Y1Y__36633_7	group1: disappeard at specific stages	level4
Y1Y__36633	biological_process	cellular component biogenesis	182	0.0092	GO:0044085	Y1Y__36633_7	group1: disappeard at specific stages	level4
Y1Y__36633	biological_process	cellular catabolic process	418	0.0211	GO:0044248	Y1Y__36633_7	group1: disappeard at specific stages	level4
Y1Y__36633	biological_process	cellular biosynthetic process	2795	0.1415	GO:0044249	Y1Y__36633_7	group1: disappeard at specific stages	level4
Y1Y__36633	biological_process	small molecule biosynthetic process	314	0.0159	GO:0044283	Y1Y__36633_7	group1: disappeard at specific stages	level4
Y1Y__36633	biological_process	heterocycle metabolic process	3530	0.1787	GO:0046483	Y1Y__36633_7	group1: disappeard at specific stages	level4
Y1Y__36633	biological_process	nucleobase-containing small molecule metabolic process	469	0.0237	GO:0055086	Y1Y__36633_7	group1: disappeard at specific stages	level4
Y1Y__36633	biological_process	carbohydrate derivative metabolic process	537	0.0271	GO:1901135	Y1Y__36633_7	group1: disappeard at specific stages	level4
Y1Y__36633	biological_process	organic cyclic compound metabolic process	3531	0.1788	GO:1901360	Y1Y__36633_7	group1: disappeard at specific stages	level4
Y1Y__36633	biological_process	organonitrogen compound metabolic process	671	0.0339	GO:1901564	Y1Y__36633_7	group1: disappeard at specific stages	level4
Y1Y__36633	biological_process	organic substance catabolic process	495	0.025	GO:1901575	Y1Y__36633_7	group1: disappeard at specific stages	level4
Y1Y__36633	biological_process	organic substance biosynthetic process	2795	0.1415	GO:1901576	Y1Y__36633_7	group1: disappeard at specific stages	level4
Y1Y__36732	molecular_function	nucleic acid binding	1291	0.0653	GO:0003676	Y1Y__36732_3	group1: disappeard at specific stages	level4
Y1Y__36732	biological_process	nucleobase-containing compound metabolic process	3510	0.1777	GO:0006139	Y1Y__36732_3	group1: disappeard at specific stages	level4
Y1Y__36732	biological_process	cellular aromatic compound metabolic process	3530	0.1787	GO:0006725	Y1Y__36732_3	group1: disappeard at specific stages	level4
Y1Y__36732	molecular_function	enzyme activator activity	31	0.0015	GO:0008047	Y1Y__36732_3	group1: disappeard at specific stages	level4
Y1Y__36732	biological_process	response to extracellular stimulus	58	0.0029	GO:0009991	Y1Y__36732_3	group1: disappeard at specific stages	level4
Y1Y__36732	biological_process	cellular response to extracellular stimulus	45	0.0022	GO:0031668	Y1Y__36732_3	group1: disappeard at specific stages	level4
Y1Y__36732	biological_process	cellular response to stress	530	0.0268	GO:0033554	Y1Y__36732_3	group1: disappeard at specific stages	level4
Y1Y__36732	biological_process	cellular nitrogen compound metabolic process	3572	0.1809	GO:0034641	Y1Y__36732_3	group1: disappeard at specific stages	level4
Y1Y__36732	molecular_function	identical protein binding	443	0.0224	GO:0042802	Y1Y__36732_3	group1: disappeard at specific stages	level4
Y1Y__36732	biological_process	macromolecule metabolic process	3322	0.1682	GO:0043170	Y1Y__36732_3	group1: disappeard at specific stages	level4
Y1Y__36732	biological_process	positive regulation of molecular function	57	0.0028	GO:0044093	Y1Y__36732_3	group1: disappeard at specific stages	level4
Y1Y__36732	biological_process	cellular biosynthetic process	2795	0.1415	GO:0044249	Y1Y__36732_3	group1: disappeard at specific stages	level4
Y1Y__36732	biological_process	cellular macromolecule metabolic process	2995	0.1516	GO:0044260	Y1Y__36732_3	group1: disappeard at specific stages	level4
Y1Y__36732	biological_process	heterocycle metabolic process	3530	0.1787	GO:0046483	Y1Y__36732_3	group1: disappeard at specific stages	level4
Y1Y__36732	biological_process	regulation of catalytic activity	64	0.0032	GO:0050790	Y1Y__36732_3	group1: disappeard at specific stages	level4
Y1Y__36732	biological_process	cellular response to external stimulus	46	0.0023	GO:0071496	Y1Y__36732_3	group1: disappeard at specific stages	level4
Y1Y__36732	biological_process	organic cyclic compound metabolic process	3531	0.1788	GO:1901360	Y1Y__36732_3	group1: disappeard at specific stages	level4
Y1Y__36732	biological_process	organic substance biosynthetic process	2795	0.1415	GO:1901576	Y1Y__36732_3	group1: disappeard at specific stages	level4
Y1Y__36960	molecular_function	nucleic acid binding	1291	0.0653	GO:0003676	Y1Y__36960_6	group1: disappeard at specific stages	level4
Y1Y__36960	biological_process	nucleobase-containing compound metabolic process	3510	0.1777	GO:0006139	Y1Y__36960_4	group1: disappeard at specific stages	level4
Y1Y__36960	biological_process	cellular aromatic compound metabolic process	3530	0.1787	GO:0006725	Y1Y__36960_4	group1: disappeard at specific stages	level4
Y1Y__36960	biological_process	viral process	4311	0.2183	GO:0016032	Y1Y__36960_12	group1: disappeard at specific stages	level4
Y1Y__36960	biological_process	viral process	4311	0.2183	GO:0016032	Y1Y__36960_4	group1: disappeard at specific stages	level4
Y1Y__36960	biological_process	viral process	4311	0.2183	GO:0016032	Y1Y__36960_6	group1: disappeard at specific stages	level4
Y1Y__36960	molecular_function	transferase activity, transferring phosphorus-containing groups	1843	0.0933	GO:0016772	Y1Y__36960_4	group1: disappeard at specific stages	level4
Y1Y__36960	molecular_function	hydrolase activity, acting on acid anhydrides	1713	0.0867	GO:0016817	Y1Y__36960_6	group1: disappeard at specific stages	level4
Y1Y__36960	molecular_function	DNA polymerase activity	1699	0.086	GO:0034061	Y1Y__36960_4	group1: disappeard at specific stages	level4
Y1Y__36960	biological_process	cellular nitrogen compound metabolic process	3572	0.1809	GO:0034641	Y1Y__36960_4	group1: disappeard at specific stages	level4
Y1Y__36960	biological_process	macromolecule metabolic process	3322	0.1682	GO:0043170	Y1Y__36960_4	group1: disappeard at specific stages	level4
Y1Y__36960	biological_process	cellular biosynthetic process	2795	0.1415	GO:0044249	Y1Y__36960_4	group1: disappeard at specific stages	level4
Y1Y__36960	biological_process	cellular macromolecule metabolic process	2995	0.1516	GO:0044260	Y1Y__36960_4	group1: disappeard at specific stages	level4
Y1Y__36960	biological_process	heterocycle metabolic process	3530	0.1787	GO:0046483	Y1Y__36960_4	group1: disappeard at specific stages	level4
Y1Y__36960	biological_process	organic cyclic compound metabolic process	3531	0.1788	GO:1901360	Y1Y__36960_4	group1: disappeard at specific stages	level4
Y1Y__36960	biological_process	organic substance biosynthetic process	2795	0.1415	GO:1901576	Y1Y__36960_4	group1: disappeard at specific stages	level4
Y1Y__37544	cellular_component	host cell part	1347	0.0682	GO:0033643	Y1Y__37544_4	group1: disappeard at specific stages	level4
Y1Y__37544	cellular_component	host cell	1348	0.0682	GO:0043657	Y1Y__37544_4	group1: disappeard at specific stages	level4
Y1Y__37974	molecular_function	ribonuclease activity	301	0.0152	GO:0004540	Y1Y__37974_8	group1: disappeard at specific stages	level4
Y1Y__37974	biological_process	nucleobase-containing compound metabolic process	3510	0.1777	GO:0006139	Y1Y__37974_8	group1: disappeard at specific stages	level4
Y1Y__37974	biological_process	cellular aromatic compound metabolic process	3530	0.1787	GO:0006725	Y1Y__37974_8	group1: disappeard at specific stages	level4
Y1Y__37974	biological_process	viral process	4311	0.2183	GO:0016032	Y1Y__37974_8	group1: disappeard at specific stages	level4
Y1Y__37974	molecular_function	transferase activity, transferring phosphorus-containing groups	1843	0.0933	GO:0016772	Y1Y__37974_8	group1: disappeard at specific stages	level4
Y1Y__37974	molecular_function	hydrolase activity, acting on ester bonds	1071	0.0542	GO:0016788	Y1Y__37974_8	group1: disappeard at specific stages	level4
Y1Y__37974	cellular_component	host cell part	1347	0.0682	GO:0033643	Y1Y__37974_8	group1: disappeard at specific stages	level4
Y1Y__37974	molecular_function	DNA polymerase activity	1699	0.086	GO:0034061	Y1Y__37974_8	group1: disappeard at specific stages	level4
Y1Y__37974	biological_process	cellular nitrogen compound metabolic process	3572	0.1809	GO:0034641	Y1Y__37974_8	group1: disappeard at specific stages	level4
Y1Y__37974	biological_process	macromolecule metabolic process	3322	0.1682	GO:0043170	Y1Y__37974_8	group1: disappeard at specific stages	level4
Y1Y__37974	cellular_component	host cell	1348	0.0682	GO:0043657	Y1Y__37974_8	group1: disappeard at specific stages	level4
Y1Y__37974	biological_process	cellular biosynthetic process	2795	0.1415	GO:0044249	Y1Y__37974_8	group1: disappeard at specific stages	level4
Y1Y__37974	biological_process	cellular macromolecule metabolic process	2995	0.1516	GO:0044260	Y1Y__37974_8	group1: disappeard at specific stages	level4
Y1Y__37974	biological_process	heterocycle metabolic process	3530	0.1787	GO:0046483	Y1Y__37974_8	group1: disappeard at specific stages	level4
Y1Y__37974	biological_process	organic cyclic compound metabolic process	3531	0.1788	GO:1901360	Y1Y__37974_8	group1: disappeard at specific stages	level4
Y1Y__37974	biological_process	organic substance biosynthetic process	2795	0.1415	GO:1901576	Y1Y__37974_8	group1: disappeard at specific stages	level4
Y1Y__37974	biological_process	response to salt	222	0.0112	GO:1902074	Y1Y__37974_8	group1: disappeard at specific stages	level4
Y1Y__40963	molecular_function	nucleic acid binding	1291	0.0653	GO:0003676	Y1Y__40963_4	group1: disappeard at specific stages	level4
Y1Y__40963	biological_process	viral process	4311	0.2183	GO:0016032	Y1Y__40963_4	group1: disappeard at specific stages	level4
Y1Y__40963	molecular_function	hydrolase activity, acting on acid anhydrides	1713	0.0867	GO:0016817	Y1Y__40963_4	group1: disappeard at specific stages	level4
Y1Y__4124	molecular_function	ribonuclease activity	301	0.0152	GO:0004540	Y1Y__4124_2	group1: disappeard at specific stages	level4
Y1Y__4124	biological_process	nucleobase-containing compound metabolic process	3510	0.1777	GO:0006139	Y1Y__4124_2	group1: disappeard at specific stages	level4
Y1Y__4124	biological_process	cellular aromatic compound metabolic process	3530	0.1787	GO:0006725	Y1Y__4124_2	group1: disappeard at specific stages	level4
Y1Y__4124	biological_process	viral process	4311	0.2183	GO:0016032	Y1Y__4124_2	group1: disappeard at specific stages	level4
Y1Y__4124	molecular_function	transferase activity, transferring phosphorus-containing groups	1843	0.0933	GO:0016772	Y1Y__4124_2	group1: disappeard at specific stages	level4
Y1Y__4124	molecular_function	hydrolase activity, acting on ester bonds	1071	0.0542	GO:0016788	Y1Y__4124_2	group1: disappeard at specific stages	level4
Y1Y__4124	cellular_component	host cell part	1347	0.0682	GO:0033643	Y1Y__4124_2	group1: disappeard at specific stages	level4
Y1Y__4124	molecular_function	DNA polymerase activity	1699	0.086	GO:0034061	Y1Y__4124_2	group1: disappeard at specific stages	level4
Y1Y__4124	biological_process	cellular nitrogen compound metabolic process	3572	0.1809	GO:0034641	Y1Y__4124_2	group1: disappeard at specific stages	level4
Y1Y__4124	biological_process	macromolecule metabolic process	3322	0.1682	GO:0043170	Y1Y__4124_2	group1: disappeard at specific stages	level4
Y1Y__4124	cellular_component	host cell	1348	0.0682	GO:0043657	Y1Y__4124_2	group1: disappeard at specific stages	level4
Y1Y__4124	biological_process	cellular biosynthetic process	2795	0.1415	GO:0044249	Y1Y__4124_2	group1: disappeard at specific stages	level4
Y1Y__4124	biological_process	cellular macromolecule metabolic process	2995	0.1516	GO:0044260	Y1Y__4124_2	group1: disappeard at specific stages	level4
Y1Y__4124	biological_process	heterocycle metabolic process	3530	0.1787	GO:0046483	Y1Y__4124_2	group1: disappeard at specific stages	level4
Y1Y__4124	biological_process	organic cyclic compound metabolic process	3531	0.1788	GO:1901360	Y1Y__4124_2	group1: disappeard at specific stages	level4
Y1Y__4124	biological_process	organic substance biosynthetic process	2795	0.1415	GO:1901576	Y1Y__4124_2	group1: disappeard at specific stages	level4
Y1Y__4124	biological_process	response to salt	222	0.0112	GO:1902074	Y1Y__4124_2	group1: disappeard at specific stages	level4
Y1Y__41506	molecular_function	peptidase activity	96	0.0048	GO:0008233	Y1Y__41506_2	group1: disappeard at specific stages	level4
Y1Y__41506	biological_process	protein metabolic process	239	0.0121	GO:0019538	Y1Y__41506_2	group1: disappeard at specific stages	level4
Y1Y__41506	biological_process	macromolecule metabolic process	3322	0.1682	GO:0043170	Y1Y__41506_2	group1: disappeard at specific stages	level4
Y1Y__41506	biological_process	organonitrogen compound metabolic process	671	0.0339	GO:1901564	Y1Y__41506_2	group1: disappeard at specific stages	level4
Y1Y__41550	biological_process	viral process	4311	0.2183	GO:0016032	Y1Y__41550_3	group1: disappeard at specific stages	level4
Y1Y__41670	biological_process	nucleobase-containing compound metabolic process	3510	0.1777	GO:0006139	Y1Y__41670_3	group1: disappeard at specific stages	level4
Y1Y__41670	biological_process	cellular aromatic compound metabolic process	3530	0.1787	GO:0006725	Y1Y__41670_3	group1: disappeard at specific stages	level4
Y1Y__41670	biological_process	viral process	4311	0.2183	GO:0016032	Y1Y__41670_3	group1: disappeard at specific stages	level4
Y1Y__41670	molecular_function	transferase activity, transferring phosphorus-containing groups	1843	0.0933	GO:0016772	Y1Y__41670_3	group1: disappeard at specific stages	level4
Y1Y__41670	molecular_function	DNA polymerase activity	1699	0.086	GO:0034061	Y1Y__41670_3	group1: disappeard at specific stages	level4
Y1Y__41670	biological_process	cellular nitrogen compound metabolic process	3572	0.1809	GO:0034641	Y1Y__41670_3	group1: disappeard at specific stages	level4
Y1Y__41670	biological_process	macromolecule metabolic process	3322	0.1682	GO:0043170	Y1Y__41670_3	group1: disappeard at specific stages	level4
Y1Y__41670	biological_process	cellular biosynthetic process	2795	0.1415	GO:0044249	Y1Y__41670_3	group1: disappeard at specific stages	level4
Y1Y__41670	biological_process	cellular macromolecule metabolic process	2995	0.1516	GO:0044260	Y1Y__41670_3	group1: disappeard at specific stages	level4
Y1Y__41670	biological_process	heterocycle metabolic process	3530	0.1787	GO:0046483	Y1Y__41670_3	group1: disappeard at specific stages	level4
Y1Y__41670	biological_process	organic cyclic compound metabolic process	3531	0.1788	GO:1901360	Y1Y__41670_3	group1: disappeard at specific stages	level4
Y1Y__41670	biological_process	organic substance biosynthetic process	2795	0.1415	GO:1901576	Y1Y__41670_3	group1: disappeard at specific stages	level4
Y1Y__43123	biological_process	viral process	4311	0.2183	GO:0016032	Y1Y__43123_1	group1: disappeard at specific stages	level4
Y1Y__43123	cellular_component	host cell part	1347	0.0682	GO:0033643	Y1Y__43123_1	group1: disappeard at specific stages	level4
Y1Y__43123	cellular_component	host cell	1348	0.0682	GO:0043657	Y1Y__43123_1	group1: disappeard at specific stages	level4
[truncated: 114,155 more rows]
