# Supplementary material for: Developmental Dynamics of the Gut Virome in Tibetan Pigs at High Altitude: A Metagenomic Perspective across Age Groups
Source: Viruses. 2024 Apr 14;16(4):606. doi: 10.3390/v16040606 (PMC11054254; doi:10.3390/v16040606)
Supplement: Supplementary file 1 [file viruses-16-00606-s001.zip › Supplemental Table S5.xls]

## Sheet: Supplemental table5
Table S5:Putative vAMGs results predicted by Dram-v
Unnamed: 0	fasta	scaffold	gene_position	start_position	end_position	strandedness	rank	ko_id	kegg_hit	viral_id	viral_hit	viral_RBH	viral_identity	viral_bitScore	viral_eVal	peptidase_id	peptidase_family	peptidase_hit	peptidase_RBH	peptidase_identity	peptidase_bitScore	peptidase_eVal	pfam_hits	cazy_ids	cazy_hits	cazy_subfam_ec	cazy_best_hit	vogdb_id	vogdb_hits	vogdb_categories	heme_regulatory_motif_count	virsorter_category	auxiliary_score	is_transposon	amg_flags
B3Y__18981__full-cat_1_79	final-viral-combined-for-dramv	B3Y__18981__full-cat_1	79	79506	80042	-1	C	K01520	dUTP diphosphatase [EC:3.6.1.23]	YP_010359475.1	YP_010359475.1 dUTP diphosphatase [uncultured phage cr44_1]	TRUE	0.941	353	6.103e-111								dUTPase [PF00692.23]								0	1	2	FALSE	M
B3Y__18981__full-cat_1_83	final-viral-combined-for-dramv	B3Y__18981__full-cat_1	83	82476	83564	-1	D			YP_010111660.1	YP_010111660.1 anaerobic ribonucleoside reductase large subunit [uncultured phage cr85_1]	FALSE	0.83	610	2.421e-196								ATP cone domain [PF03477.20]; Anaerobic ribonucleoside-triphosphate reductase [PF13597.10]								0	1	2	FALSE	MKE
B5Y__9308__full-cat_1_48	final-viral-combined-for-dramv	B5Y__9308__full-cat_1	48	26871	28148	1	C	K00558	DNA (cytosine-5)-methyltransferase 1 [EC:2.1.1.37]	YP_009285459.1	YP_009285459.1 DNA methyltransferase [Bacillus phage Deep Blue]	FALSE	0.38	271	7.468e-78								C-5 cytosine-specific DNA methylase [PF00145.21]					VOG03804	sp|P34877|MTSA_LACLC Type II methyltransferase M1.ScrFI; XhXp	Xp;Xh	0	1	1	FALSE	M
Y1Y__20493__full-cat_1_29	final-viral-combined-for-dramv	Y1Y__20493__full-cat_1	29	26528	27742	-1	C	K00558	DNA (cytosine-5)-methyltransferase 1 [EC:2.1.1.37]	YP_009626695.1	YP_009626695.1 DNA methyltransferase [Bacillus phage BM15]	FALSE	0.34	217	8.007e-60								C-5 cytosine-specific DNA methylase [PF00145.21]					VOG03804	sp|P34877|MTSA_LACLC Type II methyltransferase M1.ScrFI; XhXp	Xp;Xh	0	1	2	FALSE	M
Y1Y__27846__full-cat_1_145	final-viral-combined-for-dramv	Y1Y__27846__full-cat_1	145	90965	91546	1	C	K01520	dUTP diphosphatase [EC:3.6.1.23]	YP_010359358.1	YP_010359358.1 Dut dUTPase [uncultured phage cr77_1]	FALSE	0.598	186	1.904e-52								dUTPase [PF00692.23]					VOG35642	REFSEQ dUTPase; Xu	Xu	0	1	1	FALSE	M
Y1Y__29664__full-cat_1_34	final-viral-combined-for-dramv	Y1Y__29664__full-cat_1	34	25879	27594	1	C	K00558	DNA (cytosine-5)-methyltransferase 1 [EC:2.1.1.37]	YP_010664482.1	YP_010664482.1 C-5 cytosine-specific DNA methylase [Aeromonas phage vB_AsaM_LPM4]	FALSE	0.459	450	3.492e-137								C-5 cytosine-specific DNA methylase [PF00145.21]					VOG03804	sp|P34877|MTSA_LACLC Type II methyltransferase M1.ScrFI; XhXp	Xp;Xh	0	1	1	FALSE	M
Y1Y__40210__full-cat_1_22	final-viral-combined-for-dramv	Y1Y__40210__full-cat_1	22	15174	15590	-1	C	K01520	dUTP diphosphatase [EC:3.6.1.23]	YP_001426981.1	YP_001426981.1 dUTPase [Acanthocystis turfacea chlorella virus 1]	FALSE	0.337	70	1.633e-13								dUTPase [PF00692.23]								0	1	2	FALSE	M
Y1Y__43797__full-cat_1_13	final-viral-combined-for-dramv	Y1Y__43797__full-cat_1	13	7398	8039	-1	D			YP_010805840.1	YP_010805840.1 acyltransferase [Yangshan Harbor Nitrososphaeria virus]	FALSE	0.311	71	1.065e-12								Bacterial transferase hexapeptide (six repeats) [PF00132.28]; Dynactin subunit 5 [PF21711.1]; Hexapeptide repeat of succinyl-transferase [PF14602.10]					VOG04360	sp|Q5UR11|YL142_MIMIV Uncharacterized protein L142; Xu	Xu	0	2	1	FALSE	MK
Y3Y__32409__full-cat_1_22	final-viral-combined-for-dramv	Y3Y__32409__full-cat_1	22	19501	20715	-1	C	K00558	DNA (cytosine-5)-methyltransferase 1 [EC:2.1.1.37]	YP_009626695.1	YP_009626695.1 DNA methyltransferase [Bacillus phage BM15]	FALSE	0.34	217	8.007e-60								C-5 cytosine-specific DNA methylase [PF00145.21]					VOG03804	sp|P34877|MTSA_LACLC Type II methyltransferase M1.ScrFI; XhXp	Xp;Xh	0	1	1	FALSE	M
Y4Y__35999__full-cat_1_19	final-viral-combined-for-dramv	Y4Y__35999__full-cat_1	19	19630	20271	-1	D			YP_010805840.1	YP_010805840.1 acyltransferase [Yangshan Harbor Nitrososphaeria virus]	FALSE	0.311	71	1.065e-12								Bacterial transferase hexapeptide (six repeats) [PF00132.28]; Dynactin subunit 5 [PF21711.1]; Hexapeptide repeat of succinyl-transferase [PF14602.10]					VOG04360	sp|Q5UR11|YL142_MIMIV Uncharacterized protein L142; Xu	Xu	0	2	1	FALSE	MK
Z1Y__14396__full-cat_1_62	final-viral-combined-for-dramv	Z1Y__14396__full-cat_1	62	71924	72433	1	D			YP_010114447.1	YP_010114447.1 endolysin [Flavobacterium phage vB_FspM_immuto_2-6A]	FALSE	0.345	94	2.459e-21								Mannosyl-glycoprotein endo-beta-N-acetylglucosaminidase [PF01832.24]					VOG12154	sp|Q9I4P4|FLGJ_PSEAE Peptidoglycan hydrolase FlgJ; Xh	Xh	0	1	2	FALSE	MK
Z1Y__14396__full-cat_1_82	final-viral-combined-for-dramv	Z1Y__14396__full-cat_1	82	87681	90422	1	C	K00525	ribonucleoside-diphosphate reductase alpha chain [EC:1.17.4.1]	YP_009910809.1	YP_009910809.1 ribonucleotide reductase [Bacteroides phage crAss001]	FALSE	0.468	754	6.576e-236								Ribonucleotide reductase, barrel domain [PF02867.19]					VOG00052	sp|P00452|RIR1_ECOLI Ribonucleoside-diphosphate reductase 1 subunit alpha; Xh	Xh	0	1	2	FALSE	MKE
Z1Y__14396__full-cat_1_83	final-viral-combined-for-dramv	Z1Y__14396__full-cat_1	83	90419	90922	1	C	K01520	dUTP diphosphatase [EC:3.6.1.23]	YP_010111156.1	YP_010111156.1 dUTP diphosphatase [uncultured phage cr108_1]	FALSE	0.484	149	2.431e-40								dUTPase [PF00692.23]								0	1	2	FALSE	M
Z2Y__14935__full-cat_1_52	final-viral-combined-for-dramv	Z2Y__14935__full-cat_1	52	40193	40735	1	C	K01520	dUTP diphosphatase [EC:3.6.1.23]	YP_010356853.1	YP_010356853.1 deoxyuridine 5'-triphosphate nucleotidohydrolase [Tenacibaculum phage Gundel_1]	FALSE	0.346	103	3.721e-24								dUTPase [PF00692.23]								0	1	2	FALSE	M
Z2Y__25106__full-cat_1_72	final-viral-combined-for-dramv	Z2Y__25106__full-cat_1	72	80012	80521	1	D			YP_010114447.1	YP_010114447.1 endolysin [Flavobacterium phage vB_FspM_immuto_2-6A]	FALSE	0.345	94	2.459e-21								Mannosyl-glycoprotein endo-beta-N-acetylglucosaminidase [PF01832.24]					VOG12154	sp|Q9I4P4|FLGJ_PSEAE Peptidoglycan hydrolase FlgJ; Xh	Xh	0	1	2	FALSE	MK
Z2Y__41426__full-cat_1_54	final-viral-combined-for-dramv	Z2Y__41426__full-cat_1	54	39523	39909	1	C	K01737	6-pyruvoyltetrahydropterin/6-carboxytetrahydropterin synthase [EC:4.2.3.12 4.1.2.50]	YP_007005879.1	YP_007005879.1 QueD-like 6-pyruvoyl-tetrahydropterin synthase [Bacillus phage BCD7]	FALSE	0.327	66	4.94e-12								6-pyruvoyl tetrahydropterin synthase [PF01242.23]					VOG02559	sp|Q1RHI6|QUED_RICBR 6-carboxy-5,6,7,8-tetrahydropterin synthase; Xh	Xh	0	1	1	FALSE	MK
Z2Y__41426__full-cat_1_59	final-viral-combined-for-dramv	Z2Y__41426__full-cat_1	59	41884	43599	1	C	K06920	7-cyano-7-deazaguanine synthase [EC:6.3.4.20]	YP_007005876.1	YP_007005876.1 QueC-like queuosine biosynthesis [Bacillus phage BCD7]	FALSE	0.321	109	4.107e-23								Queuosine biosynthesis protein QueC [PF06508.17]; Radical SAM superfamily [PF04055.25]; 4Fe-4S single cluster domain [PF13353.10]					VOG00444	sp|P19891|ASNS_CRIGR Asparagine synthetase [glutamine-hydrolyzing]; Xh	Xh	0	1	1	FALSE	MK
Z2Y__41426__full-cat_1_62	final-viral-combined-for-dramv	Z2Y__41426__full-cat_1	62	44295	44846	1	C	K01495	GTP cyclohydrolase IA [EC:3.5.4.16]	YP_007005873.1	YP_007005873.1 GTP cyclohydrolase [Bacillus phage BCD7]	FALSE	0.463	137	1.099e-35								GTP cyclohydrolase I [PF01227.26]					VOG02443	sp|A4J5D0|GCH1_DESRM GTP cyclohydrolase 1; Xh	Xh	0	1	1	FALSE	MK
Z3Y__15242__full-cat_1_19	final-viral-combined-for-dramv	Z3Y__15242__full-cat_1	19	20613	21320	-1	D																Dynactin subunit 5 [PF21711.1]; Bacterial transferase hexapeptide (six repeats) [PF00132.28]; Hexapeptide repeat of succinyl-transferase [PF14602.10]								0	2	2	FALSE	MK
Z3Y__15399__full-cat_1_23	final-viral-combined-for-dramv	Z3Y__15399__full-cat_1	23	15904	16314	-1	C	K01520	dUTP diphosphatase [EC:3.6.1.23]	YP_001498748.1	YP_001498748.1 dUTPase [Paramecium bursaria Chlorella virus AR158]	FALSE	0.435	106	5.526e-26								dUTPase [PF00692.23]								0	1	2	FALSE	M
Z3Y__18804__full-cat_1_35	final-viral-combined-for-dramv	Z3Y__18804__full-cat_1	35	27408	28109	-1	C	K06920	7-cyano-7-deazaguanine synthase [EC:6.3.4.20]	YP_004306890.1	YP_004306890.1 QueC-like queuosine biosynthesis [Streptococcus phage Dp-1]	FALSE	0.431	179	2.76e-49								Queuosine biosynthesis protein QueC [PF06508.17]; NAD synthase [PF02540.21]; tRNA methyl transferase HUP domain [PF03054.20]					VOG00444	sp|P19891|ASNS_CRIGR Asparagine synthetase [glutamine-hydrolyzing]; Xh	Xh	0	1	1	FALSE	MK
Z3Y__18804__full-cat_1_36	final-viral-combined-for-dramv	Z3Y__18804__full-cat_1	36	28114	28680	-1	C	K01495	GTP cyclohydrolase IA [EC:3.5.4.16]	YP_004306893.1	YP_004306893.1 GTP cyclohydrolase [Streptococcus phage Dp-1]	FALSE	0.517	177	1.146e-49								GTP cyclohydrolase I [PF01227.26]					VOG02443	sp|A4J5D0|GCH1_DESRM GTP cyclohydrolase 1; Xh	Xh	0	1	1	FALSE	MK
Z3Y__18804__full-cat_1_38	final-viral-combined-for-dramv	Z3Y__18804__full-cat_1	38	29255	29698	-1	C	K01737	6-pyruvoyltetrahydropterin/6-carboxytetrahydropterin synthase [EC:4.2.3.12 4.1.2.50]	YP_007378981.1	YP_007378981.1 QueD-like 6-pyruvoyl-tetrahydropterin synthase [Haloarcula vallismortis tailed virus 1]	FALSE	0.321	62	2.138e-10								6-pyruvoyl tetrahydropterin synthase [PF01242.23]					VOG02559	sp|Q1RHI6|QUED_RICBR 6-carboxy-5,6,7,8-tetrahydropterin synthase; Xh	Xh	0	1	1	FALSE	MK
Z3Y__7516__full-cat_1_62	final-viral-combined-for-dramv	Z3Y__7516__full-cat_1	62	39265	41424	1	C	K21636	ribonucleoside-triphosphate reductase (formate) [EC:1.1.98.6]	YP_010111660.1	YP_010111660.1 anaerobic ribonucleoside reductase large subunit [uncultured phage cr85_1]	TRUE	0.713	1022	0								Anaerobic ribonucleoside-triphosphate reductase [PF13597.10]; ATP cone domain [PF03477.20]					VOG03818	sp|Q9L646|NRDD_SALTY Anaerobic ribonucleoside-triphosphate reductase; Xh	Xh	1	1	2	FALSE	MKE
Z3Y__7516__full-cat_1_66	final-viral-combined-for-dramv	Z3Y__7516__full-cat_1	66	43060	43584	1	C	K01520	dUTP diphosphatase [EC:3.6.1.23]	YP_010111658.1	YP_010111658.1 dUTP diphosphatase [uncultured phage cr85_1]	FALSE	0.702	253	4.408e-76								dUTPase [PF00692.23]								0	1	2	FALSE	M
Z4Y__11480__full-cat_1_93	final-viral-combined-for-dramv	Z4Y__11480__full-cat_1	93	36933	37814	1	C	K21636	ribonucleoside-triphosphate reductase (formate) [EC:1.1.98.6]	YP_009986287.1	YP_009986287.1 NrdD-like anaerobic ribonucleotide reductase large subunit [Escherichia phage nieznany]	TRUE	0.984	610	1.349e-197								Anaerobic ribonucleoside-triphosphate reductase [PF13597.10]								0	1	2	FALSE	M
Z4Y__11480__full-cat_1_95	final-viral-combined-for-dramv	Z4Y__11480__full-cat_1	95	38572	39516	1	C	K21636	ribonucleoside-triphosphate reductase (formate) [EC:1.1.98.6]	YP_009803457.1	YP_009803457.1 anaerobic ribonucleoside reductase large subunit [Klebsiella phage ZCKP1]	TRUE	0.987	654	1.69e-212								Anaerobic ribonucleoside-triphosphate reductase [PF13597.10]; Glycine radical [PF01228.25]								0	1	2	FALSE	M
Z4Y__11480__full-cat_1_219	final-viral-combined-for-dramv	Z4Y__11480__full-cat_1	219	121704	123950	1	D			YP_009786557.1	YP_009786557.1 NrdA-like aerobic NDP reductase large subunit [Escherichia phage ESCO13]	TRUE	0.972	1533	0								Ribonucleotide reductase, barrel domain [PF02867.19]; Ribonucleotide reductase, all-alpha domain [PF00317.25]					VOG00052	sp|P00452|RIR1_ECOLI Ribonucleoside-diphosphate reductase 1 subunit alpha; Xh	Xh	0	1	1	FALSE	MKE
Z4Y__11480__full-cat_1_226	final-viral-combined-for-dramv	Z4Y__11480__full-cat_1	226	126562	127554	1	D			YP_010356397.1	YP_010356397.1 MAG: nucleotide-sugar epimerase [Dompiswa phage TSP7_1]	TRUE	0.993	694	5.372e-226								GDP-mannose 4,6 dehydratase [PF16363.9]; NAD dependent epimerase/dehydratase family [PF01370.25]; 3-beta hydroxysteroid dehydrogenase/isomerase family [PF01073.23]; RmlD substrate binding domain [PF04321.21]; Polysaccharide biosynthesis protein [PF02719.1					VOG00131	sp|Q9EQC1|3BHS7_MOUSE 3 beta-hydroxysteroid dehydrogenase type 7; Xh	Xh	0	1	1	FALSE	MK
Z4Y__11480__full-cat_1_229	final-viral-combined-for-dramv	Z4Y__11480__full-cat_1	229	128998	129840	1	D			YP_010356394.1	YP_010356394.1 MAG: nucleotide-sugar epimerase [Dompiswa phage TSP7_1]	TRUE	0.956	565	4.052e-182								RmlD substrate binding domain [PF04321.21]; NAD dependent epimerase/dehydratase family [PF01370.25]; GDP-mannose 4,6 dehydratase [PF16363.9]; Polysaccharide biosynthesis protein [PF02719.19]; Male sterility protein [PF07993.16]					VOG00131	sp|Q9EQC1|3BHS7_MOUSE 3 beta-hydroxysteroid dehydrogenase type 7; Xh	Xh	0	2	1	FALSE	MK
Z4Y__11480__full-cat_1_233	final-viral-combined-for-dramv	Z4Y__11480__full-cat_1	233	130801	131559	1	D			YP_009986816.1	YP_009986816.1 PhoH-like phosphate starvation-inducible [Escherichia phage ukendt]	TRUE	0.946	503	3.394e-161								PhoH-like protein [PF02562.20]; AAA domain [PF13245.10]; AAA domain [PF13604.10]					VOG02347	sp|O07635|YLAK_BACSU Uncharacterized protein YlaK; Xh	Xh	0	1	2	FALSE	MK
Z4Y__21585__full-cat_1_14	final-viral-combined-for-dramv	Z4Y__21585__full-cat_1	14	26015	26518	-1	C	K01520	dUTP diphosphatase [EC:3.6.1.23]	YP_010111156.1	YP_010111156.1 dUTP diphosphatase [uncultured phage cr108_1]	FALSE	0.484	149	2.431e-40								dUTPase [PF00692.23]								0	1	2	FALSE	M
Z4Y__21585__full-cat_1_15	final-viral-combined-for-dramv	Z4Y__21585__full-cat_1	15	26515	29256	-1	C	K00525	ribonucleoside-diphosphate reductase alpha chain [EC:1.17.4.1]	YP_009910809.1	YP_009910809.1 ribonucleotide reductase [Bacteroides phage crAss001]	TRUE	0.468	754	6.576e-236								Ribonucleotide reductase, barrel domain [PF02867.19]					VOG00052	sp|P00452|RIR1_ECOLI Ribonucleoside-diphosphate reductase 1 subunit alpha; Xh	Xh	0	1	2	FALSE	MKE
Z4Y__21585__full-cat_1_35	final-viral-combined-for-dramv	Z4Y__21585__full-cat_1	35	44504	45013	-1	D			YP_010114447.1	YP_010114447.1 endolysin [Flavobacterium phage vB_FspM_immuto_2-6A]	FALSE	0.345	94	2.459e-21								Mannosyl-glycoprotein endo-beta-N-acetylglucosaminidase [PF01832.24]					VOG12154	sp|Q9I4P4|FLGJ_PSEAE Peptidoglycan hydrolase FlgJ; Xh	Xh	0	1	2	FALSE	MK
Z4Y__24466__full-cat_1_66	final-viral-combined-for-dramv	Z4Y__24466__full-cat_1	66	37740	39422	1	D			YP_010683095.1	YP_010683095.1 virion structural protein [Streptococcus phage P7952]	TRUE	0.507	367	6.269e-109	MER0505185	C104	MER0505185 - family C104 unassigned peptidases (Streptococcus ictaluri) [C104.UPW]#C104#{peptidase unit: 455-586}~source WP_008088848~	FALSE	0.561	143	1.302e-33	Mannosyl-glycoprotein endo-beta-N-acetylglucosaminidase [PF01832.24]					VOG19602	REFSEQ amidase; Xu	Xu	0	0	2	FALSE	MKP
Z4Y__7771__full-cat_1_11	final-viral-combined-for-dramv	Z4Y__7771__full-cat_1	11	6611	7318	-1	D																Dynactin subunit 5 [PF21711.1]; Bacterial transferase hexapeptide (six repeats) [PF00132.28]; Hexapeptide repeat of succinyl-transferase [PF14602.10]								0	2	1	FALSE	MK
Z5Y__23655__full-cat_1_57	final-viral-combined-for-dramv	Z5Y__23655__full-cat_1	57	49688	51181	1	C	K03462	nicotinamide phosphoribosyltransferase [EC:2.4.2.12]	YP_010111353.1	YP_010111353.1 nicotinamide phosphoribosyl transferase [uncultured phage cr111_1]	TRUE	0.874	906	5.845e-296								Nicotinate phosphoribosyltransferase (NAPRTase) family [PF04095.20]; Nicotinamide phosphoribosyltransferase, N-terminal domain [PF18127.5]					VOG00761	sp|Q6FDK2|NAMPT_ACIAD Nicotinamide phosphoribosyltransferase; Xh	Xh	0	1	1	FALSE	MK
Z5Y__23655__full-cat_1_80	final-viral-combined-for-dramv	Z5Y__23655__full-cat_1	80	68503	69609	1	C	K21636	ribonucleoside-triphosphate reductase (formate) [EC:1.1.98.6]	YP_010359665.1	YP_010359665.1 anaerobic ribonucleoside reductase large subunit [uncultured phage cr18_1]	FALSE	0.435	285	1.262e-83								Anaerobic ribonucleoside-triphosphate reductase [PF13597.10]; ATP cone domain [PF03477.20]								0	1	1	FALSE	MKE
Z5Y__23655__full-cat_1_84	final-viral-combined-for-dramv	Z5Y__23655__full-cat_1	84	72050	72532	1	C	K01520	dUTP diphosphatase [EC:3.6.1.23]	YP_010111325.1	YP_010111325.1 putative dUTPase [uncultured phage cr111_1]	FALSE	0.754	238	2.717e-71								dUTPase [PF00692.23]								0	1	1	FALSE	M
Z5Y__24038__full-cat_1_34	final-viral-combined-for-dramv	Z5Y__24038__full-cat_1	34	22608	24539	-1	C	K00558	DNA (cytosine-5)-methyltransferase 1 [EC:2.1.1.37]	YP_007006930.1	YP_007006930.1 DNA methyltransferase [Pectobacterium phage ZF40]	TRUE	0.423	479	6.32e-146								C-5 cytosine-specific DNA methylase [PF00145.21]					VOG03804	sp|P34877|MTSA_LACLC Type II methyltransferase M1.ScrFI; XhXp	Xp;Xh	0	1	2	FALSE	M
Z5Y__25959__full-cat_1_86	final-viral-combined-for-dramv	Z5Y__25959__full-cat_1	86	67337	70645	-1	D			YP_010845116.1	YP_010845116.1 recombinase [Vibrio phage vB_VpaM_VPs20]	FALSE	0.226	253	1.817e-66	MER0194250	N10	MER0194250 - family N10 unassigned peptide lyases (Cyanothece sp. CCY0110) [N10.UPW]#N10#{peptidase unit: 78-272}~source EAZ88681~	FALSE	0.359	77	1.457e-12	Ribonucleotide reductase, barrel domain [PF02867.19]								0	1	1	FALSE	MKE
Z5Y__25959__full-cat_1_107	final-viral-combined-for-dramv	Z5Y__25959__full-cat_1	107	90409	91143	-1	C	K06920	7-cyano-7-deazaguanine synthase [EC:6.3.4.20]	YP_010114440.1	YP_010114440.1 QueC-like queuosine biosynthesis [Flavobacterium phage vB_FspM_immuto_2-6A]	FALSE	0.366	163	8.46e-44								Queuosine biosynthesis protein QueC [PF06508.17]					VOG00444	sp|P19891|ASNS_CRIGR Asparagine synthetase [glutamine-hydrolyzing]; Xh	Xh	0	1	1	FALSE	MK
Z5Y__25959__full-cat_1_112	final-viral-combined-for-dramv	Z5Y__25959__full-cat_1	112	93666	94307	-1	C	K01495	GTP cyclohydrolase IA [EC:3.5.4.16]	YP_007673450.1	YP_007673450.1 GTP cyclohydrolase [Cellulophaga phage phiST]	FALSE	0.466	174	3.959e-48								GTP cyclohydrolase I [PF01227.26]					VOG02443	sp|A4J5D0|GCH1_DESRM GTP cyclohydrolase 1; Xh	Xh	0	1	2	FALSE	MK
Z5Y__25959__full-cat_1_115	final-viral-combined-for-dramv	Z5Y__25959__full-cat_1	115	95321	95911	-1	C	K01737	6-pyruvoyltetrahydropterin/6-carboxytetrahydropterin synthase [EC:4.2.3.12 4.1.2.50]														6-pyruvoyl tetrahydropterin synthase [PF01242.23]					VOG02559	sp|Q1RHI6|QUED_RICBR 6-carboxy-5,6,7,8-tetrahydropterin synthase; Xh	Xh	0	2	2	FALSE	MK
Z5Y__26772__full-cat_1_114	final-viral-combined-for-dramv	Z5Y__26772__full-cat_1	114	68618	69142	1	D			YP_009910829.1	YP_009910829.1 glycoside hydrolase/peptidoglycan hydrolase [Bacteroides phage crAss001]	FALSE	0.741	193	2.899e-55								Mannosyl-glycoprotein endo-beta-N-acetylglucosaminidase [PF01832.24]					VOG12154	sp|Q9I4P4|FLGJ_PSEAE Peptidoglycan hydrolase FlgJ; Xh	Xh	0	1	1	FALSE	MK
Z5Y__26772__full-cat_1_135	final-viral-combined-for-dramv	Z5Y__26772__full-cat_1	135	84718	86202	1	C	K00525	ribonucleoside-diphosphate reductase alpha chain [EC:1.17.4.1]	YP_010111715.1	YP_010111715.1 ribonucleotide reductase [uncultured phage cr126_1]	TRUE	0.764	799	5.771e-259								Ribonucleotide reductase, barrel domain [PF02867.19]					VOG00052	sp|P00452|RIR1_ECOLI Ribonucleoside-diphosphate reductase 1 subunit alpha; Xh	Xh	0	1	1	FALSE	MKE
Z5Y__26772__full-cat_1_136	final-viral-combined-for-dramv	Z5Y__26772__full-cat_1	136	86512	87465	1	D			YP_010111471.1	YP_010111471.1 ribonucleotide reductase [uncultured phage cr112_1]	FALSE	0.694	441	1.08e-138								Ribonucleotide reductase, barrel domain [PF02867.19]								0	1	1	FALSE	MKE
Z5Y__27415__full-cat_1_43	final-viral-combined-for-dramv	Z5Y__27415__full-cat_1	43	26552	27094	-1	C	K01520	dUTP diphosphatase [EC:3.6.1.23]	YP_009010745.1	YP_009010745.1 dUTPase [Croceibacter phage P2559Y]	FALSE	0.309	70	1.148e-12								dUTPase [PF00692.23]								0	1	2	FALSE	M
Z5Y__28252__full-cat_1_36	final-viral-combined-for-dramv	Z5Y__28252__full-cat_1	36	20572	21801	1	C	K00558	DNA (cytosine-5)-methyltransferase 1 [EC:2.1.1.37]	YP_009195825.1	YP_009195825.1 DNA methyltransferase [Clostridium phage phiCD505]	TRUE	0.552	430	5.13e-133								C-5 cytosine-specific DNA methylase [PF00145.21]					VOG03804	sp|P34877|MTSA_LACLC Type II methyltransferase M1.ScrFI; XhXp	Xp;Xh	0	1	2	FALSE	M
Z5Y__28627__full-cat_1_62	final-viral-combined-for-dramv	Z5Y__28627__full-cat_1	62	37449	38270	1	C	K02050	NitT/TauT family transport system permease protein																						0	2	1	FALSE	M
Z5Y__28627__full-cat_1_84	final-viral-combined-for-dramv	Z5Y__28627__full-cat_1	84	51393	53006	1	C	K07192	flotillin	YP_010803522.1	YP_010803522.1 flotillin domain-containing protein [Fadolivirus algeromassiliense]	FALSE	0.197	102	7.266e-21	MER0803447	I87	MER0803447 - family I87 unassigned peptidase inhibitors (Elizabethkingia meningoseptica) [I87.UPW]#I87#{inhibitor unit: 9-232}~source R9CHE6~	FALSE	0.573	248	2.482e-68	SPFH domain / Band 7 family [PF01145.29]								0	2	1	FALSE	MKP
Z5Y__28627__full-cat_1_153	final-viral-combined-for-dramv	Z5Y__28627__full-cat_1	153	94396	96639	1	C	K00525	ribonucleoside-diphosphate reductase alpha chain [EC:1.17.4.1]	YP_010111471.1	YP_010111471.1 ribonucleotide reductase [uncultured phage cr112_1]	FALSE	0.303	378	3.925e-110								Ribonucleotide reductase, barrel domain [PF02867.19]					VOG00052	sp|P00452|RIR1_ECOLI Ribonucleoside-diphosphate reductase 1 subunit alpha; Xh	Xh	0	1	1	FALSE	MKE
Z5Y__28627__full-cat_1_157	final-viral-combined-for-dramv	Z5Y__28627__full-cat_1	157	97319	97675	1	C	K01520	dUTP diphosphatase [EC:3.6.1.23]	YP_006383810.1	YP_006383810.1 putative dUTP diphosphatase [Acinetobacter phage AP22]	FALSE	0.512	123	3.22e-32								dUTPase [PF00692.23]								0	1	1	FALSE	M
